# Supplementary material for: Quantitative Determination of Approximate Centrosymmetry in P 1 Organic Crystals
Source: Royal Society of Chemistry journal article supplement (doi:10.1039/d5ce01181g), 2026-01-01
Supplement: d5ce01181g1.xlsx [file d5ce01181g1.xlsx]

## Sheet: ChiPi Calssification
Refcode	Class	Note	Kryptoracemic?	Diast?	Space Gp. Symbol	Space Gp. Number	Is Sohncke?	Has Disorder?	R-factor	Number of chiral resd	Number of chiral families	Number of chiral center	Chiral Atom Symb	Number of Carbon Chiral Atom	Number of Chiral Center having H	R	S	M	Number and type of chiral configuration	Number of chiral configuration	Number of molecule in Family	AU_chirality	point_group_of_chiral_mol	Unique Chemical Units	Z Prime	Z Value	Note1	Note2	Note3	Note4-H assign	a	b	c	Alpha	Beta	Gamma	Cell Volume	Calc. Density	formula	Compound Name	Study Temp.	pressure	melting_point	color	polymorph	phase_transitions	recrystallisation_solvent	remarks	authors_comma_delimited
ABERIM	CHIRAL	Enantiopure	NO	NO	P1	1	TRUE	FALSE	3.29	2	1	6	C	6	6	4	2	0	(2, RSR)	1	2	chiral	C1	2	2	2	Wa-could be Diast	contains following chiral atom(s)C	NA	NA	8.0192	11.0816	12.3628	98.313	97.337	106.49	1025.75	1.33861	C21 H25 N4 O5	(7-oxyl-3-4-hydroxy-5-(hydroxymethyl)oxolan-2-yl-6,6,8,8-tetramethyl-6,7,8,10-tetrahydropyrimido4,5-bpyrrolo3,4-findol-2(3H)-one radical)	150.0 K	None	None	None	None	None	None	Add symm suggest P-1 but we have confirmed that the starting material is chiral	A.-L.J.Segler, S.Th Sigurdsson
ABIDIA	CHIRAL	Enantiopure + achiral molecule	NO	NO	P1	1	TRUE	FALSE	3.24	2	1	10	C	10	10	4	6	0	(2, SRSRS)	1	2	chiral	C1	4	2	2	Wa-could be Diast	contains following chiral atom(s)C	NA	NA	9.9605	11.4468	13.0628	111.413	100.86	101.302	1303.38	1.5206	C26 H25 Br1 N2 O2,C1 H1 Cl3	7-Bromo-3-(2-nitro-1-phenylethyl)-9-phenyl-2,3,3a,4,9,9a-hexahydro-1H-cyclopentabquinoline chloroform solvate	at 100.3 K	None	None	white	None	None	None	None	K.L.Jensen, G.Dickmeiss, B.S.Donslund, P.H.Poulsen, K.A.Jorgensen
ABIZEQ	CHIRAL	Enantiopure	NO	NO	P1	1	TRUE	FALSE	4.96	2	1	2	C	2	2	0	2	0	(2, S)	1	2	chiral	C1	2	2	2	Wa-could be Diast	contains following chiral atom(s)C	NA	NA	5.641	11.685	15.701	92.94	98.34	101.75	999.035	1.3346	C22 H21 F2 N1 O2 S1	(2S,RS)-(((p-Tolylsulfoxido)methyl)-(2,6-difluorophenyl)methyl)-(4-methoxyphenyl)amide	None	None	483-485 K	colorless	None	None	None	None	C.Zucca, P.Bravo, E.Corradi, S.V.Meille, A.Volonterio, M.Zanda
ABONEM	DIASTEREOMER		NO	NO	P1	1	TRUE	FALSE	4.16	4	1	16	C P	12	12	10	6	0	(2, SRRS), (2, RRRS)	2	4	diast	C1	4	4	4	DIAST-3	contains following chiral atom(s)P,C	NA	NA	10.1381	10.9317	23.438	78.951	80.774	89.706	2515.55	1.17328	C28 H34 B1 O2 P1	Dibenzob,dfuran-6-yl(((-)-mentholato)-(phenyl)(trihydroboryl)phosphorane)	at 173 K	None	None	colorless	None	None	None	None	Hongsui Sun, J.S.Ritch, P.G.Hayes
ABORER	ACHIRAL	+ achiral molecule	NO	NO	P1	1	TRUE	FALSE	4.98	0	0	0	No Chiral atom	0	0	0	0	0						2	2	2	NA	contains following chiral atom(s)No Chiral atom	NA	NA	6.9929	7.4314	10.8133	87.691	81.691	72.949	531.594	1.38843	C14 H10 N2 O1	2-phenyl-4H-pyrido1,2-apyrimidin-4-one	296 K	None	None	colorless	None	None	None	None	Zhengwang Chen, Yuelu Wen, Hao Ding, Guotian Luo, Min Ye, Liangxian Liu, Jun Xue
ABOSIV	ACHIRAL	+ achiral molecule	NO	NO	P1	1	TRUE	FALSE	4.06	0	0	0	No Chiral atom	0	0	0	0	0						2	2	2	NA	contains following chiral atom(s)No Chiral atom	NA	NA	8.4088	8.5398	10.6572	90.356	102.868	97.987	738.284	1.49877	C15 H13 Br1 N2 O2	3-Bromo-N-(2-methoxybenzylidene)benzohydrazide	at 298 K	None	None	colorless	None	None	None	None	Hai-Yun Zhu
ACATOQ	CHIRAL	Enantiopure	NO	NO	P1	1	TRUE	FALSE	4.51	2	1	10	C	10	8	8	2	0	(2, SRRRR)	1	2	chiral	C1	2	2	2	Wa-could be Diast	contains following chiral atom(s)C	NA	NA	6.1822	13.451	14.282	79.78	89.81	76.78	1136.97	1.49954	C22 H28 I1 N1 O5	N-(1-(3,5-dimethyl-2,4-dioxo-6-(2-phenylethyl)tetrahydro-2H-pyran-3-yl)-3-iodobut-2-en-1-yl)-2-hydroxypropanamide	296 K	None	None	colorless	None	None	None	None	Kuan Zheng, Defeng Shen, Ran Hong
ACEYIS	CHIRAL	Enantiopure	NO	NO	P1	1	TRUE	FALSE	3.34	1	1	2	C	2	2	2	0	0	(1, RR)	1	1	chiral	C1	1	1	1	W1_enantiopure AU	contains following chiral atom(s)C	NA	NA	8.0606	8.806	9.7956	75.641	72.147	67.674	605.344	1.29078	C31 H28 F2 O2	4,5-bis(fluoro(diphenyl)methyl)-2,2-dimethyl-1,3-dioxolane	at 100 K	None	None	colorless	None	None	None	None	A.Pichota, V.Gramlich, A.Beck, D.Seebach
ACEZOX	ACHIRAL	+ achiral molecule	NO	NO	P1	1	TRUE	FALSE	4.35	0	0	0	No Chiral atom	0	0	0	0	0						4	4	4	NA	contains following chiral atom(s)No Chiral atom	NA	NA	10.0853	10.0892	30.1129	88.403	88.589	90.021	3061.95	1.14261	C30 H55 O5 P1	Pentacyclohexyloxyphosphorane	at 180 K	None	None	colorless	None	None	None	None	J.E.Davies, A.J.Kirby, C.D.Roussev
ACHIST20	CHIRAL	Enantiopure + achiral molecule	NO	NO	P1	1	TRUE	FALSE	2.9	2	1	2	C	2	2	0	2	0	(2, S)	1	2	chiral	C1	4	2	2	Wa-could be Diast	contains following chiral atom(s)C	NA	NA	8.865	9.097	7.346	102.24	90.3	117.73	508.749	1.40485	C8 H11 N3 O3,H2 O1	L-N-Acetylhistidine monohydrate	None	None	None	None	None	None	None	None	T.J.Kistenmacher, D.J.Hunt, R.E.Marsh
ACHIST21	CHIRAL	Enantiopure + achiral molecule	NO	NO	P1	1	TRUE	FALSE	4.28	2	1	2	C	2	2	0	2	0	(2, S)	1	2	chiral	C1	4	2	2	Wa-could be Diast	contains following chiral atom(s)C	NA	NA	7.2605	8.8025	9.0692	62.439	77.318	89.453	498.46	1.43385	C8 H11 N3 O3,H2 O1	L-N-Acetylhistidine monohydrate	100 K	None	None	colorless	None	None	None	None	B.W.Skelton, M.J.Piggott, M.C.Walkey
ACIWOY	ACHIRAL	+ achiral molecule	NO	NO	P1	1	TRUE	FALSE	4.01	0	0	0	No Chiral atom	0	0	0	0	0						2	1	1	NA	contains following chiral atom(s)No Chiral atom	NA	NA	7.9711	8.3909	9.5169	99.1945	108.748	110.617	536.739	1.47643	C21 H13 O6 P1,C1 H2 Cl2	1-(2-Carboxyphenyl)-1,1-spiro-bi(3H-2,1-benzoxaphosphole)-3,3-dione dichloromethane solvate	at 293 K	None	None	colorless	None	None	heptane/dichloromethane	None	A.Chandrasekaran, R.O.Day, R.R.Holmes
ADAJAQ	CHIRAL	Enantiopure + achiral molecule	NO	NO	P1	1	TRUE	FALSE	4.71	1	1	8	C	8	6	2	6	0	(1, SSSSSSRR)	1	1	chiral	C1	2	1	1	W1_enantiopure AU	contains following chiral atom(s)C	NA	NA	7.3742	10.2464	11.3595	72.976	78.717	74.046	782.874	1.43316	C30 H22 O12,C6 H15 N1	Cytoskyrin A triethylamine solvate	at 173 K	None	None	yellow/orange	None	None	None	None	S.F.Brady, M.P.Singh, J.E.Janso, J.Clardy
ADAWOT	CHIRAL	Enantiopure	NO	NO	P1	1	TRUE	FALSE	4.87	1	1	1	C	1	1	0	1	0	(1, S)	1	1	chiral	C1	1	1	1	W2_enantiopure AU	contains following chiral atom(s)C	NA	NA	5.2707	6.0091	13.3406	95.15	100.549	92.625	412.871	1.29649	C16 H22 N2 O5	Methyl 4-((N-(t-butoxycarbonyl)alanyl)amino)benzoate	at 296 K	None	None	white	None	None	None	None	P.Koley, A.Pramanik
ADERIO	CHIRAL	Enantiopure	NO	NO	P1	1	TRUE	FALSE	3.33	2	1	2	Si	0	0	0	2	0	(2, S)	1	2	chiral	C1	2	2	2	Wa-could be Diast	contains following chiral atom(s)Si	NA	NA	7.2482	9.4977	16.211	81.234	84.074	68.141	1022.33	1.21332	C20 H28 N1 O2 P1 Si1	4-t-butyl-N,N-diethyl-4-phenyl-2H,4H-1,3,2,4-benzodioxaphosphasilin-2-amine	113.2 K	None	None	colorless	None	None	None	None	Hongpeng Zhang, Dongbing Zhao
ADGSMF	CHIRAL	Enantiopure	NO	NO	P1	1	TRUE	FALSE	4.9	1	1	6	C	6	4	3	3	0	(1, RSSRSR)	1	1	chiral	C1	1	1	1	W1_enantiopure AU	contains following chiral atom(s)C	NA	NA	5.569	9.478	10.803	108.56	99.92	98.21	520.414	1.335	C18 H26 O11	cis-2,3,4,6-Tetra-O-acetyl-1-deoxy-D-glucopyranoside-1,2-spiro(3-methyl-3-hydroxy-tetrahydrofuran)	None	None	None	None	None	None	None	None	G.Remy, L.Cottier, G.Descotes, R.Faure, H.Loiseleur, G.Thomas-David
ADGSMH	CHIRAL	Enantiopure	NO	NO	P1	1	TRUE	FALSE	3.5	1	1	6	C	6	4	4	2	0	(1, RSRRSR)	1	1	chiral	C1	1	1	1	W1_enantiopure AU	contains following chiral atom(s)C	NA	NA	5.709	9.491	10.412	105.72	98.37	98.25	527.274	1.31764	C18 H26 O11	trans-2,3,4,6-Tetra-O-acetyl-1-deoxy-D-glucopyranoside-1,2-spiro(3-methyl-3-hydroxy-tetrahydrofuran)	None	None	None	None	None	None	None	None	G.Remy, L.Cottier, G.Descotes, R.Faure, H.Loiseleur, G.Thomas-David
ADIGED	CHIRAL	Enantiopure	NO	NO	P1	1	TRUE	FALSE	3.88	2	1	2	C	2	0	2	0	0	(2, R)	1	2	chiral	C1	2	2	2	Wa-could be Diast	contains following chiral atom(s)C	NA	NA	6.9069	7.5708	15.0339	89.354	84.929	87.912	782.512	1.22393	C21 H20 O1	1-methylidene-6-(naphthalen-2-yl)spiro4.5dec-6-en-8-one	293 K	None	None	colorless	None	None	None	None	Chuncheng Zou, Lei Yang, Lei Zhang, Chengyu Liu, Yueyue Ma, Gonghua Song, Zhen Liu, Ruihua Cheng, Jinxing Ye
ADIREK	CHIRAL	Enantiopure	NO	NO	P1	1	TRUE	FALSE	3.36	2	1	8	C	8	6	6	2	0	(2, RSRR)	1	2	chiral	C1	2	2	2	Wa-could be Diast	contains following chiral atom(s)C	NA	NA	10.219	10.276	12.18	86.46	66.27	70.75	1101.69	1.2828	C24 H27 N1 O4 S1	cis-like-2-Methyl-2-((3aR,8aS)-3-p-toluenesulfonyl-3,3a,8,8a-tetrahydro-2H-indeno(1,2-d)(1,3)oxazolidin-2-yl)cyclohexanone	at 223 K	None	396.3-397.4 K	colorless	None	None	None	None	M.Bruggemann, R.Frohlich, B.Wibbeling, C.Holst, D.Hoppe
ADMPOT10	CHIRAL	Enantiopure + achiral molecule	NO	NO	P1	1	TRUE	FALSE	2.9	2	1	10	C P	8	8	8	2	0	(2, RRRRS)	1	2	chiral	C1	3	2	2	Wa-could be Diast	contains following chiral atom(s)P,C	NA	NA	10.51	9.419	7.803	76.77	97.24	95.99	743.667	1.58204	C11 H16 N5 O6 P1,0.5(H2 O1)	Adenosine-5-methylphosphonate hemihydrate	None	None	None	None	None	None	None	None	C.L.Barnes, S.W.Hawkinson
ADUNAP	CHIRAL	Enantiopure	NO	NO	P1	1	TRUE	FALSE	4.06	3	1	12	C	12	6	3	9	0	(3, SSSR)	1	3	chiral	C1	3	3	3	Wa-could be Diast	contains following chiral atom(s)C	NA	NA	10.5116	11.2613	19.5145	78.166	82.396	64.257	2034.07	1.26255	C29 H39 Br1 O3	(+)-1-(4-Bromobenzyl)-9-hydroxy-5,7-bis(3-methylbut-2-enyl)-6,6-dimethyl-2-methoxybicyclo(3.3.1)non-2-en-4-one	at 150 K	None	404-405 K	colorless	None	None	None	None	V.Rodeschini, N.S.Simpkins, C.Wilson
AFAZEP	CHIRAL	Enantiopure	NO	NO	P1	1	TRUE	FALSE	3.59	2	1	8	C	8	4	4	4	0	(2, SSRR)	1	2	chiral	C1	2	2	2	Wa-could be Diast	contains following chiral atom(s)C	NA	NA	6.2785	10.5538	14.393	100.197	100.924	91.722	919.639	1.20066	C21 H32 O3	(+)-2-(2-hydroxy-2,5,5,8a-tetramethyldecahydronaphthalen-1-yl)methylbenzene-1,4-diol	100 K	None	None	colorless	None	None	None	None	Shasha Zhang, Xia Wang, Jin Hao, Dangdang Li, Rene Csuk, Shengkun Li
AFIBUQ	ACHIRAL	+ achiral molecule	NO	NO	P1	1	TRUE	FALSE	4.24	0	0	0	No Chiral atom	0	0	0	0	0						3	1	1	NA	contains following chiral atom(s)No Chiral atom	NA	NA	8.83868	10.0203	11.2025	106.465	99.1926	105.012	889.415	1.28954	C44 H32 O2 P2,2(H2 O1)	(1,1-binaphthalene-2,2-diyl)bisdiphenylphosphine oxide dihydrate	100 K	None	None	colorless	None	None	The material was recrystallised from ethanol by slow evaporation	None	M.E.Light, G.McGlacken
AFILIN	CHIRAL	Enantiopure	NO	NO	P1	1	TRUE	FALSE	3.22	1	1	8	C	8	4	0	8	0	(1, SSSSSSSS)	1	1	chiral	C1	1	1	1	W1_enantiopure AU	contains following chiral atom(s)C	NA	NA	6.5706	7.0972	13.8873	103.479	90.068	105.91	604.174	1.30425	C26 H34 O8	Asperterpene G	298 K	None	None	None	None	None	None	None	Changxing Qi, Mengting Liu, Qun Zhou, Weixi Gao, Chunmei Chen, Yongji Lai, Zhengxi Hu, Yongbo Xue, Jinwen Zhang, Dongyan Li, Xiao-Nian Li, Qing Zhang, Jianping Wang, Hucheng Zhu, Yonghui Zhang
AFINOW	CHIRAL	Enantiopure	NO	NO	P1	1	TRUE	FALSE	4.59	2	1	2	C	2	2	0	2	0	(2, S)	1	2	chiral	C1	2	2	2	Wa-could be Diast	contains following chiral atom(s)C	NA	NA	5.1699	10.4159	15.57	98.65	97.971	100.164	804.042	1.25723	C18 H24 O4	7-(but-2-en-1-yl)-6,8-dihydroxy-3-pentyl-3,4-dihydro-1H-2-benzopyran-1-one	273 K	None	None	colorless	None	None	None	None	A.I.Elshamy, T.A.Mohamed, T.Yoneyama, M.Noji, S.Ban, H.Imagawa, T.Efferth, M.-E.F.Hegazy, A.Umeyama
AFONOY	CHIRAL	Enantiopure	NO	NO	P1	1	TRUE	FALSE	4.22	4	1	16	C	16	12	12	4	0	(4, RRSR)	1	4	chiral	C1	4	4	4	Wa-could be Diast	contains following chiral atom(s)C	NA	NA	8.215	9.826	21.721	94.987	96.316	90.005	1736.01	1.4628	C16 H18 N2 O9	3,5-Di-O-acetyl-2-C-Î±-acetyloxymethyl-2.2-anhydro-1-(Î²-D-arabinofuranosyl)uracil	at 153 K	None	None	colorless	None	None	acetone/hexane	None	Q.Dai, J.A.Piccirilli, C.Zheng, S.-J.Li
AFOQUK	CHIRAL	Enantiopure	NO	NO	P1	1	TRUE	FALSE	3.6	2	1	2	C	2	2	0	2	0	(2, S)	1	2	chiral	C1	2	2	2	Wa-could be Diast	contains following chiral atom(s)C	NA	NA	9.5285	11.2177	12.848	79.832	70.753	79.19	1263.75	1.39401	C26 H32 Br1 N3 O4	N2-(4-bromophenyl)acetyl-N-cyclohexyl-N2-(4-nitrophenyl)norleucinamide	100 K	None	None	colorless	None	None	None	None	Jian Zhang, Peiyuan Yu, Shao-Yu Li, He Sun, Shao-Hua Xiang, Jun (Joelle) Wang, K.N.Houk, Bin Tan
AGABUI	ACHIRAL	+ achiral molecule	NO	NO	P1	1	TRUE	FALSE	4.9	0	0	0	No Chiral atom	0	0	0	0	0						2	2	2	NA	contains following chiral atom(s)No Chiral atom	NA	NA	9.5504	10.146	15.6039	85.423	85.146	72.302	1432.94	1.66028	C26 H30 Br1 Cl2 I1 O2 S2	2-{2,5-bis(6-chlorohexyl)oxy-4-(5-iodothiophen-2-yl)phenyl}-5-bromothiophene	298 K	None	None	colorless	None	None	None	None	M.Tillard
AGIWUK	ACHIRAL	+ achiral molecule	NO	NO	P1	1	TRUE	FALSE	3.83	0	0	0	No Chiral atom	0	0	0	0	0						1	1	1	NA	contains following chiral atom(s)No Chiral atom	NA	NA	4.5737	8.645	10.203	66.362	88.474	81.886	365.675	1.32747	C19 H16 O3	4-(3-Oxobutyl)-3-phenyl-1H-isochromen-1-one	133 K	None	None	colorless	None	None	None	None	Huan Wang, Xiuling Han, Xiyan Lu
AGIXAT	CHIRAL	Enantiopure	NO	NO	P1	1	TRUE	FALSE	2.7	1	1	1	C	1	1	0	1	0	(1, S)	1	1	chiral	C1	1	1	1	W2_enantiopure AU	contains following chiral atom(s)C	NA	NA	4.5735	6.161	14.067	92.541	98.52	93.735	390.578	1.49732	C17 H12 Cl2 F1 N1 O2	2-3-(3,4-dichlorophenyl)-3-fluoropropyl-1H-isoindole-1,3(2H)-dione	173 K	None	None	colorless	None	None	None	None	Jian Zhang, Tiantian Chen, Yuanhao Wang, Fengfan Zhou, Zhenfeng Zhang, I.D.Gridnev, Wanbin Zhang
AGIYOG	CHIRAL	Enantiopure	NO	NO	P1	1	TRUE	FALSE	2.42	2	1	2	C	2	2	2	0	0	(2, R)	1	2	chiral	C1	2	2	2	Wa-could be Diast	contains following chiral atom(s)C	NA	NA	6.0216	9.2574	16.7185	79.272	80.758	89.418	903.599	1.2108	C23 H23 N1 O1	3-(Diphenylmethyl)-6-phenyl-1,3-oxazinane	at 120 K	None	None	colorless	None	None	n-hexane	None	A.D.J.Calow, A.S.Batsanov, A.Pujol, C.Sole, E.Fernandez, Andrew Whiting
AHOJOZ	CHIRAL	Enantiopure	NO	NO	P1	1	TRUE	FALSE	3.86	2	1	2	C	2	2	0	2	0	(2, S)	1	2	chiral	C1	2	2	2	Wa-could be Diast	contains following chiral atom(s)C	NA	NA	8.336	8.3603	12.679	88.818	85.357	78.411	862.755	1.26044	C19 H21 N1 O2 S1	2-2-(4-methylbenzene-1-sulfinyl)phenyl-4-(propan-2-yl)-4,5-dihydro-1,3-oxazole	160 K	None	None	colorless	None	None	hexane	None	Anthony Linden, E.Drinkel, S.Blumentritt, R.Dorta
AHOQIZ	CHIRAL	Enantiopure + achiral molecule	NO	NO	P1	1	TRUE	FALSE	3.5	1	1	4	C	4	4	0	4	0	(1, SSSS)	1	1	chiral	C1	2	1	1	W1_enantiopure AU	contains following chiral atom(s)C	NA	NA	9.7972	10.4809	12.3285	107.162	102.474	101.595	1132.47	1.15403	C37 H68 N6 O9,C2 H6 O1	(6S,12R,17R,23S)-ethyl 6,17-diisobutyl-2,2,9,9,12,20,20,23-octamethyl-4,7,10,15,18,21-hexaoxo-3-oxa-5,8,11,16,19,22-hexaazahexacosan-26-oate ethanol solvate	100 K	None	None	None	None	None	None	None	M.G.Kumar, S.N.Benke, K.Muruga Poopathi Raja, H.N.Gopi
AHOWUS	CHIRAL	Enantiopure	NO	NO	P1	1	TRUE	FALSE	2.81	2	1	8	C	8	6	4	4	0	(2, SRSR)	1	2	chiral	C1	2	2	2	Wa-could be Diast	contains following chiral atom(s)C	NA	NA	8.1248	9.5619	11.0854	107.532	100.447	90.6934	805.546	1.28796	C20 H24 O3	10-methoxy-3a,6,9-trimethyl-3a,4,5,5a,11b,11c-hexahydrophenanthro3,4-bfuran-2(1H)-one	88 K	None	None	colorless	None	None	None	None	A.S.Karns, B.D.Ellis, P.C.Roosen, Z.Chahine, K.G.Le Roch, C.D.Vanderwal
AHUNOJ	CHIRAL	Enantiopure	NO	NO	P1	1	TRUE	FALSE	3.56	2	1	2	C	2	2	2	0	0	(2, R)	1	2	chiral	C1	2	2	2	Wa-could be Diast	contains following chiral atom(s)C	NA	NA	6.0571	10.1647	14.3715	103.628	98.272	101.112	827.011	1.30674	C19 H23 N3 O2	4-anilino-1-(6-methoxy-2,3-dihydro-1H-pyrrolo2,3-bpyridin-1-yl)-3-methylbutan-1-one	93.2 K	None	None	colorless	None	None	None	None	S.K.Pagire, N.Kumagai, M.Shibasaki
AHUZOT	CHIRAL	Enantiopure	NO	NO	P1	1	TRUE	FALSE	1.6	2	1	10	C	10	10	6	4	0	(2, SRRRS)	1	2	chiral	C1	2	2	2	Wa-could be Diast	contains following chiral atom(s)C	NA	NA	6.1718	7.5275	13.9663	91.577	92.433	91.599	647.744	1.85684	C13 H15 I1 O4	1,6-Anhydro-2-iodo-4-O-benzyl-2-deoxy-Î²-D-glucopyranose	at 100 K	None	None	colorless	None	None	hexanes/diethyl ether	None	D.Hesek, Mijoon Lee, Weilie Zhang, B.C.Noll, S.Mobashery
AJEXAQ	CHIRAL	Enantiopure	NO	NO	P1	1	TRUE	FALSE	4.79	2	1	6	C	6	6	4	2	0	(2, RRS)	1	2	chiral	C1	2	2	2	Wa-could be Diast	contains following chiral atom(s)C	NA	NA	6.8937	8.67	10.3213	103.01	98.947	91.455	592.569	1.5707	C12 H13 F1 N4 O3	5-(4-amino-7-fluoro-1H-imidazo4,5-cpyridin-1-yl)-3-(hydroxymethyl)cyclopent-3-ene-1,2-diol	198 K	None	None	colorless	None	None	Ethyl acetate/methanol	None	Chong Liu, Qi Chen, J.D.Gorden, S.W.Schneller
AJORAU	ACHIRAL	+ achiral molecule	NO	NO	P1	1	TRUE	FALSE	4.42	0	0	0	No Chiral atom	0	0	0	0	0						2	2	2	NA	contains following chiral atom(s)No Chiral atom	NA	NA	7.2841	9.0015	11.683	105.25	90.58	96.87	733.057	1.7541	C18 H11 Br1 O5	7-(6-Bromo-1,3-benzodioxol-5-yl)naphtho2,3-d1,3dioxol-5-ol	173 K	None	None	colorless	None	None	None	The temperature of the study is reported as 446 K in the supporting information and the deposited cif; we have assumed that this should be 173 K.	Zhen-Bang Lou, Xin-Long Pang, Chao Chen, Li-Rong Wen, Ming Li
AJOTID	ACHIRAL	+ achiral molecule	NO	NO	P1	1	TRUE	FALSE	4.93	0	0	0	No Chiral atom	0	0	0	0	0						4	4	4	NA	contains following chiral atom(s)No Chiral atom	NA	NA	9.3292	10.594	28.1996	96.7469	92.6058	90.5389	2764.6	1.35192	C34 H26 O4 S2	(M,S,S)-(1,1-Binaphthalene-2,2-diyl)-bis(4-methoxyphenylsulfoxide)	at 160 K	None	None	colorless	None	None	None	None	R.Mariz, A.Poater, M.Gatti, E.Drinkel, J.J.Burgi, X.Luan, S.Blumentritt, A.Linden, L.Cavallo, R.Dorta
AJOVIG	CHIRAL	Enantiopure	NO	NO	P1	1	TRUE	FALSE	3.77	2	1	6	C	6	2	2	4	0	(2, SRS)	1	2	chiral	C1	2	2	2	Wa-could be Diast	contains following chiral atom(s)C	NA	NA	6.8272	7.7944	13.3283	86.232	78.091	70.492	654.143	1.18971	C15 H22 O2	2,2,6-trimethyltricyclo5.3.1.01,6undec-8-ene-8-carboxylic acid	101 K	None	None	colorless	None	None	None	None	Shuang-Gang Ma, Ya Gao, Hui-Qiang Wang, Li Li, Yun-Bao Liu, Jing Qu, Yong Li, Song Xu, Hai-Ning Lv, Yu-Huan Li, Shi-Shan Yu
AKEHAC	CHIRAL	Enantiopure	NO	NO	P1	1	TRUE	FALSE	3.36	1	1	8	C	8	7	6	2	0	(1, SRRSRRRR)	1	1	chiral	C1	1	1	1	W1_enantiopure AU	contains following chiral atom(s)C	NA	NA	9.14	9.3542	10.6916	104.278	90.57	91.63	885.373	1.20546	C38 H42 O9	4a,8-bis(acetyloxy)-1,1,3,6-tetramethyl-9-methylidene-4-oxo-1a,4,4a,5,6,7,7a,8,9,10,11,11a-dodecahydro-1H-cyclopentaacyclopropaf11annulene-7,10-diyl dibenzoate	296 K	None	None	None	None	None	None	None	Linwei Li, Jianan Huang, Hui Lyu, Fuqin Guan, Pirui Li, Mei Tian, Shu Xu, Xingzeng Zhao, Fei Liu, C.Paetz, Xu Feng, Yu Chen
AKOFUE	ACHIRAL	+ achiral molecule	NO	NO	P1	1	TRUE	FALSE	4.17	0	0	0	No Chiral atom	0	0	0	0	0						2	2	2	NA	contains following chiral atom(s)No Chiral atom	NA	NA	7.8604	10.9975	11.8617	63.403	89.66	70.625	852.501	1.55038	C19 H16 B2 F4 N4	6-ethyl-7,7,12,12-tetrafluoro-1-methyl-7,12-dihydro-6a,7a,11b,12a-tetraaza-7,12-diboradicyclopentab,efluoranthene	100 K	None	None	black	None	None	None	None	T.Freese, L.J.Patalag, J.Luca Merz, P.G.Jones, D.B.Werz
ALADEZ	CHIRAL	Enantiopure	NO	NO	P1	1	TRUE	FALSE	2.78	2	1	2	C	2	0	0	2	0	(2, S)	1	2	chiral	C1	2	2	2	Wa-could be Diast	contains following chiral atom(s)C	NA	NA	9.3482	11.4823	12.0801	109.948	97.683	99.626	1175.98	1.08967	C25 H33 Mg1 N2	(4-{2,6-di(propan-2-yl)phenylimino}pent-2-en-2-yl(1-phenylethyl)amido)-magnesium(i)	123 K	None	None	yellow	None	None	None	None	C.N.de Bruin-Dickason, C.A.Rosengarten, G.B.Deacon, C.Jones
ALEQIU	CHIRAL	Enantiopure	NO	NO	P1	1	TRUE	FALSE	2.93	2	1	4	C	4	2	4	0	0	(2, RR)	1	2	chiral	C1	2	2	2	Wa-could be Diast	contains following chiral atom(s)C	NA	NA	8.0197	9.6836	10.155	63.873	83.678	84.07	702.415	1.38257	C15 H16 O2 S2	(3R,4R)-4-(2-(hydroxymethyl)thiophen-3-yl)-3-phenyltetrahydrothiophen-3-ol	100 K	None	None	colorless	None	None	None	None	A.Skrzynska, S.Frankowski, A.Topolska, M.Dyguda, Xin-Yue Gao, Chang-Jiang Xu, Ying-Chun Chen, L.Albrecht
ALEXEW	ACHIRAL	+ achiral molecule	NO	NO	P1	1	TRUE	FALSE	4.36	0	0	0	No Chiral atom	0	0	0	0	0						2	2	2	NA	contains following chiral atom(s)No Chiral atom	NA	NA	5.7262	12.1802	13.9555	107.612	91.962	95.56	921.282	1.43977	C23 H17 N3 O4	dimethyl 3-(1H-benzimidazol-2-yl)pyrrolo2,1-aisoquinoline-1,2-dicarboxylate	295 K	None	None	colorless	None	None	None	None	R.Belguedj, S.Bouacida, H.Merazig, A.Belfaitah, A.Chibani, A.Bouraiou
ALULEY	CHIRAL	Enantiopure	NO	NO	P1	1	TRUE	FALSE	3.5	1	1	6	C	6	6	5	1	0	(1, RRRRRS)	1	1	chiral	C1	1	1	1	W1_enantiopure AU	contains following chiral atom(s)C	NA	NA	6.247	9.807	9.346	106.48	105.14	95.08	521.752	1.29664	C20 H25 N1 O8	Dimethyl (3R,4S,5R)-3-phenyl-2-((3aR,4R,6aR)-tetrahydro-2,2-dimethylfuro(3,4-d)-1,3-dioxol-4-yl)-4,5-isoxazolidinedicarboxylate	at 293 K	None	70-71deg.C	colorless	None	None	None	None	S.Cicchi, M.Marradi, M.Corsi, C.Faggi, A.Goti
ALUYUE	CHIRAL	Enantiopure	NO	NO	P1	1	TRUE	FALSE	4.03	1	1	4	C	4	4	0	4	0	(1, SSSS)	1	1	chiral	C1	1	1	1	W1_enantiopure AU	contains following chiral atom(s)C	NA	NA	6.1577	9.9577	10.5323	82.321	88.105	73.526	613.731	1.2405	C24 H31 N2 O5 P1	5-(1,1-biphenyl-2-yl)oxy-3,8-bis(butan-2-yl)-1,6-dioxa-4,9-diaza-5Î»5-phosphaspiro4.4nonane-2,7-dione	291.1 K	None	None	colorless	None	None	None	None	Kehui Han, Yanyan Wang, Pei Zhao, Xiaohui You, Jun Wang, Yanchun Guo, Yufen Zhao, Shuxia Cao
AMENAI	CHIRAL	Enantiopure	NO	NO	P1	1	TRUE	FALSE	4.83	1	1	5	C	5	5	2	3	0	(1, SRSSR)	1	1	chiral	C1	1	1	1	W1_enantiopure AU	contains following chiral atom(s)C	NA	NA	5.124	7.0453	14.535	83.182	89.212	68.956	486.02	1.43637	C21 H24 O9	Rhaponticin	at 298 K	None	518-520 K	colorless	None	None	ethanol	None	Ying-Yong Zhao, Xiang-Yang Qin, San-Ping Chen, Yongmin Zhang, Rui-Chao Lin, Wen-Ji Sun
ANOLIZ	CHIRAL	Enantiopure + achiral molecule	NO	NO	P1	1	TRUE	FALSE	3.75	1	1	2	C	2	2	2	0	0	(1, RR)	1	1	chiral	C1	2	1	1	W1_enantiopure AU	contains following chiral atom(s)C	NA	NA	4.9179	5.4897	9.5322	92.426	102.087	94.81	250.283	1.52713	C4 H6 O6,C4 H4 N2	(R,R)-tartaric acid pyrazine	at 293 K	None	None	colorless	None	None	None	None	D.Braga, F.Grepioni, G.I.Lampronti
ANONEX	CHIRAL	Enantiopure	NO	NO	P1	1	TRUE	FALSE	2.68	2	1	2	C	2	2	0	2	0	(2, S)	1	2	chiral	C1	2	2	2	Wa-could be Diast	contains following chiral atom(s)C	NA	NA	7.102	8.033	11.9154	95.252	104.65	99.577	642.119	1.54799	C12 H13 N1 O6 S1	N-((4-(2-Carboxyvinyl)phenyl)sulfonyl)alanine	at 100 K	None	None	colorless	polymorph I	None	acetone	None	K.A.Wheeler, J.D.Wiseman, R.C.Grove
ANONEX01	CHIRAL	Enantiopure	NO	NO	P1	1	TRUE	FALSE	3.65	2	1	2	C	2	2	0	2	0	(2, S)	1	2	chiral	C1	2	2	2	Wa-could be Diast	contains following chiral atom(s)C	NA	NA	7.2536	8.0615	12.2344	79.453	80.663	71.819	663.96	1.49707	C12 H13 N1 O6 S1	N-((4-(2-Carboxyvinyl)phenyl)sulfonyl)alanine	at 296 K	None	None	colorless	polymorph IIa	None	2-butanone	None	K.A.Wheeler, J.D.Wiseman, R.C.Grove
ANONEX02	CHIRAL	Enantiopure	NO	NO	P1	1	TRUE	FALSE	3.21	2	1	2	C	2	2	0	2	0	(2, S)	1	2	chiral	C1	2	2	2	Wa-could be Diast	contains following chiral atom(s)C	NA	NA	7.23	7.9762	12.5729	87.318	77.649	63.576	633.304	1.56954	C12 H13 N1 O6 S1	N-((4-(2-Carboxyvinyl)phenyl)sulfonyl)alanine	at 100 K	None	None	colorless	polymorph IIb	None	2-butanone	None	K.A.Wheeler, J.D.Wiseman, R.C.Grove
ANONIB	CHIRAL	Enantiopure	NO	NO	P1	1	TRUE	FALSE	3.01	1	1	2	C	2	2	0	2	0	(1, SS)	1	1	chiral	C1	1	1	1	W1_enantiopure AU	contains following chiral atom(s)C	NA	NA	7.0754	8.3189	11.0891	94.832	102.101	102.424	617.507	1.60969	C24 H26 N2 O12 S2	2,4-bis(4-((1-carboxyethyl)sulfamoyl)phenyl)cyclobutane-1,3-dicarboxylic acid	at 296 K	None	None	colorless	None	None	None	None	K.A.Wheeler, J.D.Wiseman, R.C.Grove
ANOQEB	CHIRAL	Enantiopure	NO	NO	P1	1	TRUE	FALSE	4.04	1	1	3	C	3	3	2	1	0	(1, RSR)	1	1	chiral	C1	1	1	1	W1_enantiopure AU	contains following chiral atom(s)C	NA	NA	6.134	7.123	10.777	102.328	106.299	90.659	440.246	1.42691	C22 H20 Br1 N1	6-bromo-3-methyl-2,4-diphenyl-1,2,3,4-tetrahydroquinoline	173.2 K	None	None	colorless	None	None	None	None	Zhenhua Zhang, Haifeng Du
ANOZOV	CHIRAL	Enantiopure	NO	NO	P1	1	TRUE	FALSE	2.75	1	1	2	C	2	1	1	1	0	(1, RS)	1	1	chiral	C1	1	1	1	W1_enantiopure AU	contains following chiral atom(s)C	NA	NA	6.7836	6.8789	9.3443	89.618	84.706	63.972	389.866	1.22419	C17 H21 N1 O1 S1	1,7,7-trimethyl-3-{2-(methylsulfanyl)phenylimino}bicyclo2.2.1heptan-2-one	100 K	None	None	yellow	None	None	None	None	V.Filippou, S.Blickle, M.Bubrin, Wolfgang Kaim
ANUJAW	CHIRAL	Enantiopure	NO	NO	P1	1	TRUE	FALSE	4.27	1	1	4	C	4	4	1	3	0	(1, SSSR)	1	1	chiral	C1	1	1	1	W1_enantiopure AU	contains following chiral atom(s)C	NA	NA	6.1852	7.6183	9.2043	75.137	86.167	87.099	418.012	1.34845	C20 H21 N1 O2 S1	11-phenyl-6a,7,8,9,10,10a,11,11a-octahydroindolo1,2-b1,2benzothiazole 5,5-dioxide	293 K	None	None	None	None	None	None	None	qianjin an
AQEYAW	MESO		NO	NO	P1	1	TRUE	FALSE	4.56	1	1	8	C	8	8	5	3	0	(1, SRRSRSRR)	1	1	chiral, MESO	C1	1	1	1	W1_enantiopure AU	contains following chiral atom(s)C	NA	NA	6.379	9.871	13.195	99.55	96.54	96.38	806.805	1.26087	C32 H36 O12	D-1,4-di-O-(O-acetylmandeloyl)-2,3:5,6-di-O-isopropylidene-myo-inositol	at 298.2 K	None	None	colorless	None	None	None	None	K.M.Sureshan, T.Miyasou, M.Hayashi, Y.Watanabe
AQIDIQ	CHIRAL	Enantiopure	NO	NO	P1	1	TRUE	FALSE	2.99	2	1	2	C	2	2	0	2	0	(2, S)	1	2	chiral	C1	2	2	2	Wa-could be Diast	contains following chiral atom(s)C	NA	NA	7.2085	7.3743	22.9447	93.858	94.605	103.982	1174.98	1.45677	C24 H27 Br1 N4 O4	(S)-1-((cis)-1-azido-4-phenylcyclohexyl)pentan-3-yl 4-bromo-3-nitrobenzoate	173 K	None	366-367 K	colorless	None	None	hexane/ether	None	L.Gnagi, R.Arnold, F.Giornal, Harish Jangra, A.Kapat, E.Nyfeler, R.M.Scharer, H.Zipse, P.Renaud
ARAJAE	CHIRAL	Enantiopure	NO	NO	P1	1	TRUE	FALSE	3.79	1	1	2	C	2	2	1	1	0	(1, SR)	1	1	chiral	C1	1	1	1	W1_enantiopure AU	contains following chiral atom(s)C	NA	NA	5.656	10.666	10.995	98.3	103.98	103.41	611.828	1.45854	C27 H25 Br1 N2 O5	Benzyl N-((benzyloxycarbonyl)amino)-N-(4-(3-bromophenoxy)cyclopent-2-en-1-yl)carbamate	at 296 K	None	None	colorless	None	None	None	None	A.P.Luna, M.Cesario, M.Bonin, L.Micouin
ARAYUQ	CHIRAL	Enantiopure	NO	NO	P1	1	TRUE	FALSE	4.63	1	1	4	C	4	4	2	2	0	(1, RSRS)	1	1	chiral	C1	1	1	1	W1_enantiopure AU	contains following chiral atom(s)C	NA	NA	6.067	7.965	11.607	79.9	88.59	87.23	551.481	1.36864	C27 H22 N2 O3 S1	5-(4-methoxyphenyl)-4-nitro-3-(phenylsulfanyl)-3,4,5,5a-tetrahydroindolizino3,4,5-abisoindole	100 K	None	None	orange	None	None	None	None	Nicolaj Inunnguaq Jessen, G.Bertuzzi, M.Bura, M.L.Skipper, K.A.Jrgensen
ARAZUP	CHIRAL	Enantiopure	NO	NO	P1	1	TRUE	FALSE	3.9	2	1	4	C P	2	2	0	4	0	(2, SS)	1	2	chiral	C1	2	2	2	Wa-could be Diast	contains following chiral atom(s)C,P	NA	NA	8.397	9.003	14.944	80.76	74.38	63.31	971.057	1.29415	C23 H23 O3 P1	trans-4-Methyl-2-trityl-1,3,2-dioxaphosphinane 2-oxide	at 291 K	None	None	colorless	None	None	None	None	R.Kruszynski, E.Czubacka, A.Trzesowska-Kruszynska, T.J.Bartczak, K.S.Bruzik, P.Konpik, Z.Kudzin, W.J.Stec, W.M.Wolf
AREWEC	ACHIRAL	+ achiral molecule	NO	NO	P1	1	TRUE	FALSE	2.69	0	0	0	No Chiral atom	0	0	0	0	0						1	1	1	NA	contains following chiral atom(s)No Chiral atom	NA	NA	5.9594	7.747	12.894	103.174	91.499	95.991	575.684	1.34289	C26 H27 N1 O5 S1	5,6,7-trimethoxy-1-(4-methylbenzene-1-sulfonyl)methylidene-8-phenyl-1,2,3,4-tetrahydroisoquinoline	150 K	None	None	yellow	None	None	hexane / eethyl acetate	None	K.Kafuta, C.J.Rugen, T.Heilmann, Tianshu Liu, C.Golz, M.Alcarazo
AROHEX	CHIRAL	Enantiopure	NO	NO	P1	1	TRUE	FALSE	4.79	1	1	9	C	9	5	7	2	0	(1, RSSRRRRRR)	1	1	chiral	C1	1	1	1	W1_enantiopure AU	contains following chiral atom(s)C	NA	NA	7.4475	7.7239	14.5814	97.298	93.052	115.003	748.659	1.15063	C32 H54 O5	20,25-dihydroxy-3-oxodammaran-24-yl acetate	150 K	None	415-417 K	colorless	None	None	None	None	B.Mzondo, N.Dlamini, F.P.Malan, P.Labuschagne, V.R.Bovilla, S.V.Madhunapantula, V.Maharaj
ARUCEV	CHIRAL	Enantiopure	NO	NO	P1	1	TRUE	FALSE	4.3	2	1	2	C	2	2	0	2	0	(2, S)	1	2	chiral	C1	2	2	2	Wa-could be Diast	contains following chiral atom(s)C	NA	NA	5.076	10.076	10.121	95.691	102.529	103.73	484.646	1.1596	C9 H15 N1 O2	(6S)-6-Isobutylpiperidine-2,4-dione	at 293 K	None	395-397 K	colorless	None	None	dichloromethane/diisopropyl ether	None	C.Didierjean, J.Marin, E.Wenger, J.-P.Briand, A.Aubry, G.Guichard
ASOGOE	CHIRAL	Enantiopure	NO	NO	P1	1	TRUE	FALSE	4.59	2	1	2	C	2	2	0	2	0	(2, S)	1	2	chiral	C1	2	2	2	Wa-could be Diast	contains following chiral atom(s)C	NA	NA	11.2174	12.378	12.8428	74.29	72.683	84.53	1638.58	1.33098	C38 H35 F3 N2 O5	Dibenzyl (S)-5-(2-2,2,2-trifluoro-1-methoxyethylphenyl)-2,3,7,8-tetramethyl-10H-dipyrrin-1,9-dicarboxylate	at 153 K	None	413-414 K	red	None	None	chloroform/hexane	None	A.Gossauer, F.Nydegger, T.Kiss, R.Sleziak, H.Stoeckli-Evans
ASUNOU	CHIRAL	Enantiopure	NO	NO	P1	1	TRUE	FALSE	3.07	2	1	10	C	10	8	8	2	0	(2, RSRRR)	1	2	chiral	C1	2	2	2	Wa-could be Diast	contains following chiral atom(s)C	NA	NA	7.2627	10.8558	12.9086	81.804	78.739	84.592	985.642	1.24486	C22 H27 N1 O4	eÏ€-Î²-cedrenyl p-nitrobenzoate	150 K	None	None	colorless	None	None	None	None	V.Stefanow, A.Grandane, M.Eh, J.Panten, A.Spannenberg, T.Werner
ASUYIX	CHIRAL	Enantiopure	NO	NO	P1	1	TRUE	FALSE	4.21	3	1	9	C	9	9	0	9	0	(3, SSS)	1	3	chiral	C1	3	3	3	Wa-could be Diast	contains following chiral atom(s)C	NA	NA	4.6676	17.207	17.7086	75.915	87.483	82.706	1368.22	1.35225	C21 H22 F1 N1 O4	6-(2-(4-Fluorophenyl)ethyl)-3-(4-methoxybenzyl)tetrahydrofuro3,4-d1,3oxazol-2(3H)-one	at 180 K	None	None	colorless	None	None	None	None	Y.Salma, S.Ballereau, S.Ladeira, C.Lepetit, R.Chauvin, N.Andrieu-Abadie, Y.Genisson
ATEKUI	ACHIRAL	+ achiral molecule	NO	NO	P1	1	TRUE	FALSE	4.02	0	0	0	No Chiral atom	0	0	0	0	0						4	4	4	NA	contains following chiral atom(s)No Chiral atom	NA	NA	10.2852	12.8363	14.5035	102.489	105.316	90.2773	1799.19	1.21231	C17 H16 N2 O3 S1	4-(3-methyl-8-oxo-1-thia-3-azaspiro4.5deca-6,9-dien-2-ylidene)aminophenyl acetate	293 K	None	None	colorless	None	None	None	None	M.N.Aziz, R.P.Singh, D.Gout, C.J.Lovely
ATEMAO	CHIRAL	Enantiopure	NO	NO	P1	1	TRUE	FALSE	4.02	4	1	44	C	44	8	20	24	0	(4, SRSRSSRRSRS)	1	4	chiral	C1	4	4	4	Wa-could be Diast	contains following chiral atom(s)C	NA	NA	13.5779	13.641	15.0542	65.339	65.488	64.504	2191.1	1.4323	C25 H28 O9	15-Hydroxy-2,7,7,14,17,20-hexamethyl-9H-spirooxirane-2,23-5,8,16,18,21pentaoxaoctacyclo12.8.1.01,19.02,12.04,6.06,11.012,17.015,19tricos10ene-9,22-dione	at 90 K	None	None	colorless	None	None	None	None	E.D.de Silva, D.E.Williams, D.R.Jayanetti, R.M.Centko, B.O.Patrick, R.L.C.Wijesundera, R.J.Andersen
ATUJOR	CHIRAL	Enantiopure	NO	NO	P1	1	TRUE	FALSE	2.18	3	1	15	C	15	15	6	9	0	(3, SSSRR)	1	3	chiral	C1	3	3	3	Wa-could be Diast	contains following chiral atom(s)C	NA	NA	8.2374	12.4665	13.7074	64.328	88.439	86.714	1266.59	1.38138	C15 H20 Cl2 O5	(2,4-dichlorophenyl)-2,3,4-tri-O-methyl-Î±-L-rhamnopyranoside	100.0 K	None	None	colorless	None	None	None	None	C.A.H.Jones, N.D.Schley
ATUTOA	CHIRAL	Enantiopure	NO	NO	P1	1	TRUE	FALSE	4.11	3	1	12	C	12	12	3	9	0	(3, SRSS)	1	3	chiral	C1	3	3	3	Wa-could be Diast	contains following chiral atom(s)C	NA	NA	7.988	11.524	14.188	101.695	90.411	104.218	1237.53	1.17691	C17 H24 O4	3,6,10-trimethyl-2-oxo-2,3,3a,4,7,8,11,11a-octahydrocyclodecabfuran-4-yl acetate	293 K	None	416-418 K	colorless	None	None	None	None	M.Sanchez-Castellanos, M.A.Bucio, A.Hernandez-Barragan, P.Joseph-Nathan, G.Cuevas, L.Quijano
AVEJES	CHIRAL	Enantiopure	NO	NO	P1	1	TRUE	FALSE	4.25	2	1	4	C	4	2	2	2	0	(2, RS)	1	2	chiral	C1	2	2	2	Wa-could be Diast	contains following chiral atom(s)C	NA	NA	6.9252	8.5633	16.85	84.11	89.29	89.79	993.894	1.45788	C19 H22 Br1 N3 O4	Ethyl 3-(4-bromophenyl)-1-((2R,3S)-3-(methoxycarbonyl)-2-propylaziridin-2-yl)-1H-pyrazole-5-carboxylate	293 K	None	None	colorless	None	None	None	None	Dong An, Xukai Guan, Rui Guan, Lajiao Jin, Guangliang Zhang, Suoqin Zhang
AVEKOE	CHIRAL	Enantiopure	NO	NO	P1	1	TRUE	FALSE	2.98	1	1	8	C	8	7	4	4	0	(1, SRRSRSRS)	1	1	chiral	C1	1	1	1	W1_enantiopure AU	contains following chiral atom(s)C	NA	NA	8.5077	9.5855	11.0881	108.207	108.45	98.692	782.83	1.25709	C30 H40 O12	2,5,8,8-tetramethyl-12-methylidene-4,9-dioxo-1,2,3,4,5,8,9,10,11,12,13,13a-dodecahydro-3aH-cyclopenta12annulene-1,3a,10,11,13-pentayl penta-acetate	170 K	None	None	colorless	None	None	None	None	Hequn Yang, A.Mamatjan, Dan Tang, H.A.Aisa
AVOJEC	CHIRAL	Enantiopure	NO	NO	P1	1	TRUE	FALSE	4.02	2	1	4	C	4	2	0	4	0	(2, SS)	1	2	chiral	C1	2	2	2	Wa-could be Diast	contains following chiral atom(s)C	NA	NA	9.671	10.292	12.233	109.32	98.83	90.87	1132.57	1.3416	C28 H27 N1 O5	3-((5-methoxy-1-(4-methoxybenzyl)-2,3-dihydro-1H-inden-1-yl)carbonyl)-4-phenyl-1,3-oxazolidin-2-one	93 K	None	468 K	colorless	None	None	None	None	S.Yonekubo, N.Fushimi, T.Miyagi, O.Nakanishi, K.Katsuno, M.Ozawa, C.Handa, N.Furuya, H.Muranaka
AVUMEJ	CHIRAL	Enantiopure	NO	NO	P1	1	TRUE	FALSE	3.18	1	1	5	C	5	3	3	2	0	(1, RSRRS)	1	1	chiral	C1	1	1	1	W1_enantiopure AU	contains following chiral atom(s)C	NA	NA	7.509	7.777	8.43	83.776	68.993	71.511	435.843	1.36935	C20 H25 N1 O5	7Î²,14Î²-Epoxyhydrocodone-6,6-dimethoxy ketal	at 103.0 K	None	None	colorless	None	None	methanol	None	J.R.Deschamps, A.Coop, D.A.Parrish, K.C.Rice
AVUTOB	CHIRAL	Enantiopure	NO	NO	P1	1	TRUE	FALSE	3.21	1	1	2	C	2	2	2	0	0	(1, RR)	1	1	chiral	C1	1	1	1	W1_enantiopure AU	contains following chiral atom(s)C	NA	NA	4.945	6.6101	14.853	88.98	81.05	77.28	467.75	1.41376	C18 H17 Cl2 N1 O5	4-(Benzyloxy)-2,3-dichlorobutyl 4-nitrobenzoate	at 296 K	None	None	colorless	None	None	None	None	K.C.Nicolaou, N.L.Simmons, Yongcheng Ying, P.M.Heretsch, J.S.Chen
AWATOK	MESO		NO	NO	P1	1	TRUE	FALSE	3.35	1	1	8	C	8	5	3	5	0	(1, RSSRSSRS)	1	1	chiral, MESO	C1	1	1	1	W1_enantiopure AU	contains following chiral atom(s)C	NA	NA	5.9636	6.9318	10.2011	99.157	97.994	109.11	385.032	1.37728	C17 H21 N1 O5	dimethyl 2-(t-butylcarbamoyl)cubane-1,4-dicarboxylate	100 K	None	None	colorless	None	None	The material was recrystallised from dichloromethane by slow evaporation	None	D.E.Collin, K.Kovacic, M.E.Light, B.Linclau
AWAZIH	ACHIRAL	+ achiral molecule	NO	NO	P1	1	TRUE	FALSE	3.49	0	0	0	No Chiral atom	0	0	0	0	0						1	1	1	NA	contains following chiral atom(s)No Chiral atom	NA	NA	6.0808	9.8509	9.9635	112.061	105.678	92.743	525.038	1.25448	C22 H36 O2 S2	trans-5,20-Dioxa-1,16-dithiatetraspiro(5.2.2.2.5.2.2.2)hexacosane	at 297 K	None	488-490 K	colorless	None	None	None	None	A.Terec, I.Grosu, E.Condamine, L.Breau, G.Ple, Y.Ramondenc, F.D.Rochon, V.Peulon-Agasse, D.Opris
AWITUV	CHIRAL	Enantiopure + achiral molecule	NO	NO	P1	1	TRUE	FALSE	3.97	1	1	4	C	4	4	2	2	0	(1, SRRS)	1	1	chiral	C1	2	1	1	W1_enantiopure AU	contains following chiral atom(s)C	NA	NA	5.5038	10.9996	13.7978	109.081	91.805	95.318	784.324	1.25489	C34 H34 N2 O4,C3 H6 O1	2-((2,4-Dimethoxyphenyl)methyl)-3-(phenylmethyl)-9-(4-methoxyphenyl)-4,9,3a,9a-tetrahydropyrrolidino(3,4-b)quinolin-1-one acetone solvate	at 159.2 K	None	None	colorless	None	None	None	None	M.R.Spaller, W.T.Thielemann, P.E.Brennan, P.A.Bartlett
AWOTUE	CHIRAL	Enantiopure	NO	NO	P1	1	TRUE	FALSE	3.25	2	1	2	C	2	0	0	2	0	(2, S)	1	2	chiral	C1	2	2	2	Wa-could be Diast	contains following chiral atom(s)C	NA	NA	8.9992	11.8597	15.0334	102.794	102.149	111.062	1383.97	1.35953	C30 H28 F2 N2 O7	dibenzyl 1-2-(t-butoxycarbonyl)-5,6-difluoro-1-oxo-2,3-dihydro-1H-inden-2-ylhydrazine-1,2-dicarboxylate	160 K	None	None	colorless	None	None	None	None	Zhenwei WU
AXAREX	ACHIRAL	+ achiral molecule	NO	NO	P1	1	TRUE	FALSE	4.58	0	0	0	No Chiral atom	0	0	0	0	0						1	1	1	NA	contains following chiral atom(s)No Chiral atom	NA	NA	3.8649	6.5233	12.1703	91.374	95.914	103.483	296.426	1.42685	C16 H11 Cl1 O1	(E)-2-(4-Chlorobenzylidene)indan-1-one	at 100 K	None	None	light yellow	None	None	ethanol	None	M.A.Ali, T.S.Choon, L.Y.Lan, M.M.Rosli, H.-K.Fun
AXAREX01	ACHIRAL	+ achiral molecule	NO	NO	P1	1	TRUE	FALSE	3.14	0	0	0	No Chiral atom	0	0	0	0	0						1	1	1	NA	contains following chiral atom(s)No Chiral atom	NA	NA	3.8767	6.5334	12.1727	91.31	96.141	103.688	297.465	1.42187	C16 H11 Cl1 O1	2-(4-chlorophenyl)methylidene-2,3-dihydro-1H-inden-1-one	150 K	None	None	colorless	None	None	None	None	D.Manoharan, S.N.Megha, M.S.R.N.Kiran, Franziska Emmerling, B.Bhattacharya, Soumyajit Ghosh
AXEKAP	CHIRAL	Enantiopure	NO	NO	P1	1	TRUE	FALSE	3.37	2	1	8	C	8	8	6	2	0	(2, RRSR)	1	2	chiral	C1	2	2	2	Wa-could be Diast	contains following chiral atom(s)C	NA	NA	7.771	8.217	9.261	91.26	100.967	96.129	576.694	1.86068	C8 H11 Br1 N4 O5	5-Bromo-1-Î²-D-ribofuranosyl-1,2,4-triazole-3-carboxamide	at 293 K	None	None	colorless	None	None	methanol	None	Qiongyou Wu, Fanqi Qu, Jinqiao Wan, Xun Zhu, Yi Xia, Ling Peng
AXIBIT	CHIRAL	Enantiopure	NO	NO	P1	1	TRUE	FALSE	3.77	4	1	8	C	8	8	8	0	0	(4, RR)	1	4	chiral	C1	4	4	4	Wa-could be Diast	contains following chiral atom(s)C	NA	NA	11.0078	11.3157	17.788	72.11	89.35	73.86	2018.79	1.33377	C20 H24 N1 O6 P1	Diethyl (4-nitro-1-oxo-1,3-diphenylbutan-2-yl)phosphonate	at 113 K	None	None	colorless	None	None	None	None	Kuang Hu, Tao Liu, A.D.Lu, Yunfeng Liu, Youming Wang, Guiping Wu, Zhenghong Zhou, Chuchi Tang
AXIXUB	RACEMATE	Strict definition of kryptoracemate	KRYPTORACEMIC	NO	P1	1	TRUE	FALSE	4.44	2	1	6	C	6	6	3	3	0	(1, SRR), (1, RSS)	2	2	racemic	C1	2	2	2	RAC-1	contains following chiral atom(s)C	NA	NA	7.2949	7.4896	9.1863	69.591	72.516	70.028	432.637	1.52118	C7 H12 F2 O4	3,3-Difluoro-2-(hydroxymethyl)-6-methoxytetrahydro-2H-pyran-4-ol	at 150 K	None	None	colorless	None	None	None	None	G.T.Giuffredi, B.Bernet, V.Gouverneur
AXOZIZ	ACHIRAL	+ achiral molecule	NO	NO	P1	1	TRUE	FALSE	3.2	0	0	0	No Chiral atom	0	0	0	0	0						1	2	2	NA	contains following chiral atom(s)No Chiral atom	NA	NA	8.103	11.056	15.319	73.906	89.652	83.825	1310.54	0.687545	C28 H22 N4 O4 S2	2,2-disulfanediylbis6-(2,4-dimethoxyphenyl)pyridine-3-carbonitrile	293 K	None	None	None	None	None	None	z(O2) is reported as 0.227; we calculate -0.0227;	V.N.Nesterov, L.A.Rodinovskaya, V.P.Litvinov, Yu.A.Sharanin, A.M.Shestopalov, V.Yu.Mortikov, V.I.Shvedov, V.E.Shklover, Yu.T.Struchkov
AYAGOX	CHIRAL	Enantiopure	NO	NO	P1	1	TRUE	FALSE	2.62	1	1	3	C	3	3	1	2	0	(1, SSR)	1	1	chiral	C1	1	1	1	W1_enantiopure AU	contains following chiral atom(s)C	NA	NA	5.5066	9.5403	9.9805	64.11	84.029	84.088	468.166	1.23587	C22 H24 N2 O2	(3S,3aR,6R,7E)-4-(7-(4-Hydroxybenzylidene)-2,6-dimethyl-3,3a,4,5,6,7-hexahydro-2H-indazol-3-yl)phenol	at 295 K	None	527-528 K	colorless	None	None	methanol	None	V.V.Abakumov, N.S.Pivnenko, L.A.Kutulya, I.S.Konovalova, A.D.Roshal, N.B.Novikova, O.V.Shishkin
AYOHUR	ACHIRAL	+ achiral molecule	NO	NO	P1	1	TRUE	FALSE	3.4	0	0	0	No Chiral atom	0	0	0	0	0						1	1	1	NA	contains following chiral atom(s)No Chiral atom	NA	NA	4.0302	6.24	8.22	104.97	92.28	91.73	199.371	1.7001	C9 H4 F4 O1	4-Ethynyl-2,3,5,6-tetrafluoroanisole	at 120 K	None	329-330 K	light brown	None	None	hexane	None	Chaoyang Dai, Zheng Yuan, J.C.Collings, T.M.Fasina, R.Ll.Thomas, K.P.Roscoe, L.M.Stimson, D.S.Yufit, A.S.Batsanov, J.A.K.Howard, T.B.Marder
AZALIY	CHIRAL	Enantiopure	NO	NO	P1	1	TRUE	FALSE	4.11	2	1	6	C	6	6	0	6	0	(2, SSS)	1	2	chiral	C1	2	2	2	Wa-could be Diast	contains following chiral atom(s)C	NA	NA	12.0223	15.7744	15.908	61.685	76.21	82.022	2578.18	1.07962	C48 H75 N3 O9	tri-t-butyl 2,2,2-(benzene-1,3,5-triyltris(carbonylimino))tris(3-cyclohexylpropanoate)	200 K	None	None	colorless	None	None	None	None	X.Caumes, A.Baldi, G.Gontard, P.Brocorens, R.Lazzaroni, N.Vanthuyne, C.Troufflard, M.Raynal, L.Bouteiller
AZUJAH	CHIRAL	Enantiopure	NO	NO	P1	1	TRUE	FALSE	2.84	1	1	4	C	4	3	1	3	0	(1, SSRS)	1	1	chiral	C1	1	1	1	W1_enantiopure AU	contains following chiral atom(s)C	NA	NA	7.7191	8.51	9.963	79.971	67.663	64.605	546.814	1.28007	C26 H31 N1 O4	(7R,8S,9S,12S)-1-Benzyloxy-13,14-didehydro-12-hydroxy-2,13-dimethoxy-N-methylmorphinane	at 133 K	None	None	colorless	None	None	ethyl acetate/hexane	None	Xing-Liang Zheng, Ning-Fei Jiang, Dan Luo, Hong-Sheng Gao, Ai-Shun Ding
BABLAU	CHIRAL	Enantiopure	NO	NO	P1	1	TRUE	FALSE	4.72	2	1	2	C	2	2	0	2	0	(2, S)	1	2	chiral	C1	2	2	2	Wa-could be Diast	contains following chiral atom(s)C	NA	NA	6.0078	11.3885	12.9338	108.22	92.076	94.868	835.685	1.45546	C21 H13 Cl2 N1 O1	(S)-3,10-Dichloro-6-phenyl-6H-benzo5,61,3oxazino3,4-aindole	100 K	None	None	colorless	None	None	None	None	Hongming Li, K.M.Belyk, Jingjun Yin, Qinghao Chen, Alan Hyde, Yining Ji, S.Oliver, M.T.Tudge, L.-C.Campeau, K.R.Campos
BACNUP	CHIRAL	Enantiopure	NO	NO	P1	1	TRUE	FALSE	3.71	2	1	8	C	8	4	4	4	0	(2, RSRS)	1	2	chiral	C2	2	2	2	Wa-could be Diast	contains following chiral atom(s)C	NA	NA	7.755	8.489	19.891	85.24	82.39	89.09	1293.44	1.14665	C24 H38 N4 O4	(3R,6S,7S,10R)-6,7-Diallyl-3,10-di-isopropyl-2,5,9,12-tetramethoxy-1,4,8,11-tetrazadispiro(5.0.5)dodeca-1,4,8,11-tetraene	at 130 K	None	None	colorless	None	None	acetonitrile	None	J.Efskind, H.Hope, K.Undheim
BADSAB	ACHIRAL	+ achiral molecule	NO	NO	P1	1	TRUE	FALSE	3.8	0	0	0	No Chiral atom	0	0	0	0	0						4	2	2	NA	contains following chiral atom(s)No Chiral atom	NA	NA	8.597	10.12	13.311	92.15	101.98	114.11	1024.28	1.39945	C16 H10 N2 S4,C3 H7 N1 O1	5H,10H-(1,2,3,4)Tetrathiocino(5,6-b:8,7-b)di-indole dimethylformamide solvate	at 293 K	None	None	yellow	None	None	None	None	T.Janosik, J.Bergman, B.Stensland, C.Stalhandske
BAGVEM	CHIRAL	Enantiopure + achiral molecule	NO	NO	P1	1	TRUE	FALSE	3.6	2	1	4	C	4	4	2	2	0	(2, SR)	1	2	chiral	C1	3	2	2	Wa-could be Diast	contains following chiral atom(s)C	NA	NA	6.8943	7.0698	17.9334	99.126	92.701	114.185	781.161	1.33219	C16 H20 N2 O4,0.5(H2 O1)	Octahydroindolizin-1-ylmethyl 4-nitrobenzoate hemihydrate	at 150 K	None	None	colorless	None	None	None	None	S.G.Davies, A.M.Fletcher, D.G.Hughes, J.A.Lee, P.D.Price, P.M.Roberts, A.J.Russell, A.D.Smith, J.E.Thomson, O.M.H.Williams
BAHFAT	CHIRAL	Enantiopure	NO	NO	P1	1	TRUE	FALSE	4.86	2	1	4	C	4	4	0	4	0	(2, SS)	1	2	chiral	C1	2	2	2	Wa-could be Diast	contains following chiral atom(s)C	NA	NA	5.5393	9.1	26.476	97.87	94.28	95.46	1310.81	1.26329	C34 H30 N2 O2	2,2-(2,2-Diphenylethene-1,1-diyl)bis(4-benzyl-4,5-dihydro-1,3-oxazole)	at 173 K	None	None	colorless	None	None	None	None	Hongliang Chen, Fengpei Du, Lei Liu, Jing Li, Qiuying Zhao, Bin Fu
BAHROR	CHIRAL	Enantiopure + achiral molecule	NO	NO	P1	1	TRUE	FALSE	3.5	1	1	9	C	9	6	4	5	0	(1, RRSRSSRSS)	1	1	chiral	C1	2	1	1	W1_enantiopure AU	contains following chiral atom(s)C	NA	NA	11.03	13	5.886	95.05	100.52	104.97	793.483	1.14416	C29 H44 O6,C3 H6 O1	Acetylpinnasterol acetone solvate	at -20 deg.C	None	378-380 K	None	None	None	None	None	A.Fukuzawa, Y.Kumagai, T.Masamune, A.Furusaki, C.Katayama, T.Matsumoto
BAJSUD	CHIRAL	Enantiopure	NO	NO	P1	1	TRUE	FALSE	4.62	1	1	6	C	6	6	2	4	0	(1, SRRSSS)	1	1	chiral	C1	1	1	1	W1_enantiopure AU	contains following chiral atom(s)C	NA	NA	6.0519	7.661	11.9361	88.489	87.47	86.454	551.648	1.47941	C20 H21 N5 O8 S1	N-((4aR,6S,7S,8S,8aS)-7-azido-6-methoxy-2-phenylhexahydropyrano3,2-d1,3dioxin-8-yl)-4-nitrobenzenesulfonamide	120 K	None	None	colorless	None	None	None	None	T.Rucil, Z.Travnicek, P.Cankar
BAKHOK	CHIRAL	Enantiopure	NO	NO	P1	1	TRUE	FALSE	3.7	1	1	7	C	7	3	4	3	0	(1, RRSSRSR)	1	1	chiral	C1	1	1	1	W1_enantiopure AU	contains following chiral atom(s)C	NA	NA	7.338	14.856	6.267	97.1	113.6	93.2	617.066	1.14288	C30 H48 O1	Alnusenone	None	None	None	None	None	None	None	dx given as 1.10; we calculate 1.14.	M.Ohki, K.Tachibana, T.Kuroda, A.Takenaka, Y.Sasada
BAKRAI	CHIRAL	Enantiopure	NO	NO	P1	1	TRUE	FALSE	2.8	1	1	3	C	3	2	2	1	0	(1, RSR)	1	1	chiral	C1	1	1	1	W1_enantiopure AU	contains following chiral atom(s)C	NA	NA	7.3497	7.6149	8.6919	101.544	111.169	96.679	434.889	1.31905	C19 H23 N1 O3 S1	1-(10,10-Dimethyl-3,3-dioxido-3-thia-4-azatricyclo5.2.1.01,5dec-4-yl)-3-phenylprop-2-en-1-one	at 100 K	None	None	colorless	None	None	None	None	A.M.Piatek, A.Sadowska, C.Chapuis, J.Jurczak
BANKEH	CHIRAL	Enantiopure	NO	NO	P1	1	TRUE	FALSE	3.07	2	1	2	C	2	2	0	2	0	(2, S)	1	2	chiral	C1	2	2	2	Wa-could be Diast	contains following chiral atom(s)C	NA	NA	9.084	10.2905	11.056	101.931	105.783	114.622	841.429	1.68226	C16 H16 Br1 N3 O6	2,6-Dimethyl-5-nitro-4-(3-nitrophenyl)-1,4-dihydropyridine-3-carboxylic acid 2-bromoethyl ester	at 123 K	None	None	yellow	None	None	None	None	M.Nieger, H.Hupfer, J.Lehmann, D.Diewald
BANKUX	CHIRAL	Enantiopure	NO	NO	P1	1	TRUE	FALSE	2.99	2	1	2	C	2	2	2	0	0	(2, R)	1	2	chiral	C1	2	2	2	Wa-could be Diast	contains following chiral atom(s)C	NA	NA	8.9862	10.1811	11.0996	102.22	103.173	113.916	849.507	1.58812	C17 H16 Br1 N3 O4	5-Cyano-2,6-dimethyl-4-(3-nitrophenyl)-1,4-dihydropyridine-3-carboxylic acid 2-bromo-ethyl ester	at 123 K	None	None	yellow	None	None	None	None	M.Nieger, H.Hupfer, J.Lehmann, D.Diewald
BANPEM	CHIRAL	Enantiopure	NO	NO	P1	1	TRUE	FALSE	3.66	1	1	4	C	4	0	2	2	0	(1, RSSR)	1	1	chiral	C1	1	1	1	W1_enantiopure AU	contains following chiral atom(s)C	NA	NA	6.74	11.295	11.647	67.18	81.59	85.49	808.243	1.29177	C38 H44 O8	(S)-4,16-Dihydroxymethyl(2.2)paracyclophane bis((1S)-camphanoate)	at 178 K	None	None	colorless	None	None	chloroform/pentane	None	P.G.Jones, J.Hillmer, H.Hopf
BANVAO	CHIRAL	Enantiopure	NO	NO	P1	1	TRUE	FALSE	3.06	1	1	1	C	1	1	0	1	0	(1, S)	1	1	chiral	C1	1	1	1	W2_enantiopure AU	contains following chiral atom(s)C	NA	NA	5.2	10.132	10.768	65.66	83.87	79.63	508.121	1.2661	C21 H25 N1 O6	Benzyl (2S)-2-t-butoxycarbonylamino-5-(2-furyl)-5-oxopentanoate	at 160 K	None	391K	colorless	None	None	chloroform/dichloromethane	None	W.Clegg, R.F.W.Jackson, N.Wishart
BANYAS01	CHIRAL	Enantiopure	NO	NO	P1	1	TRUE	FALSE	4.17	2	1	8	C	8	6	4	4	0	(2, RSRS)	1	2	chiral	C1	2	2	2	Wa-could be Diast	contains following chiral atom(s)C	NA	NA	9.5821	9.8474	11.2666	110.259	95.335	118.589	831.438	1.32769	C19 H24 O5	1-methyl-9-(prop-1-en-2-yl)-4,16-dioxatricyclo11.2.1.13,6heptadec-6(17)-ene-5,11,14-trione	170 K	None	None	colorless	None	None	None	None	Yeqing Du, Ligong Yao, Xuwen Li, Yuewei Guo
BAPGIK	CHIRAL	Enantiopure	NO	NO	P1	1	TRUE	FALSE	2.61	1	1	5	C	5	5	4	1	0	(1, RSRRR)	1	1	chiral	C1	1	1	1	W1_enantiopure AU	contains following chiral atom(s)C	NA	NA	5.1716	5.2806	6.082	68.403	67.501	80.743	142.64	1.701	C6 H7 F1 O3	9-Fluoro-3,6,8-trioxatricyclo3.2.1.12,4nonane	at 150 K	None	None	colorless	None	None	None	None	J.Karban, I.Cisarova, T.Strasak, L.C.Stastna, J.Sykora
BAQBUR	CHIRAL	Enantiopure	NO	NO	P1	1	TRUE	FALSE	3.37	1	1	4	C	4	4	1	3	0	(1, SRSS)	1	1	chiral	C1	1	1	1	W1_enantiopure AU	contains following chiral atom(s)C	NA	NA	5.784	7.0342	7.476	63.92	64.72	75.424	246.267	1.30964	C11 H14 O3	(3aS,4S,8aR,8bS)-4-Hydroxy-3,3a,4,5,7,8,8a,8b-octahydro-1-oxa-as-indacen-2-one	at 297 K	None	385-388 K	colorless	None	None	None	None	B.Nosse, R.B.Chhor, Won Boo Jeong, C.Bohm, O.Reiser
BARTUN	ACHIRAL	+ achiral molecule	NO	NO	P1	1	TRUE	FALSE	4.02	0	0	0	No Chiral atom	0	0	0	0	0						1	1	1	NA	contains following chiral atom(s)No Chiral atom	NA	NA	5.3982	8.1894	9.6903	106.116	101.46	103.554	383.808	1.42051	C16 H19 F3 N2 O2	2-butyl-5-(butylamino)-4,6,7-trifluoro-1H-isoindole-1,3(2H)-dione	100 K	None	None	colorless	None	None	None	None	A.Ziegelmeier, W.J.Chain, G.P.A.Yap
BASXID	CHIRAL	Enantiopure	NO	NO	P1	1	TRUE	FALSE	2.9	2	1	6	C	6	4	2	4	0	(2, RSS)	1	2	chiral	C1	2	2	2	Wa-could be Diast	contains following chiral atom(s)C	NA	NA	8.7755	10.6428	13.3011	86.936	89.383	88.099	1239.76	1.43431	C28 H27 Br1 N2 O4	t-butyl 1-benzyl-3-bromo-2-hydroxy-2-oxo-1,2,2,3-tetrahydro-1H-spiroindole-3,4-quinoline-1-carboxylate	at 173 K	None	None	colorless	None	None	None	None	A.B.Dounay, K.Hatanaka, J.J.Kodanko, M.Oestreich, L.E.Overman, L.A.Pfeifer, M.M.Weiss
BAVSUM01	CHIRAL	Enantiopure + achiral molecule	NO	NO	P1	1	TRUE	FALSE	4.5	1	1	5	C	5	5	3	2	0	(1, RRSSR)	1	1	chiral	C1	2	1	1	W1_enantiopure AU	contains following chiral atom(s)C	NA	NA	7.184	8.073	17.071	91.04	93.5	110.06	927.452	1.25838	C36 H40 N4 O6,C6 H6	Methyl bacteriopheophorbide a benzene solvate	at 200 K	None	None	black	None	None	None	None	K.M.Barkigia, D.S.Gottfried, S.G.Boxer, J.Fajer
BAXROK	CHIRAL	Enantiopure	NO	NO	P1	1	TRUE	FALSE	3.94	1	1	2	C	2	2	1	1	0	(1, SR)	1	1	chiral	C1	1	1	1	W1_enantiopure AU	contains following chiral atom(s)C	NA	NA	6.2274	6.3472	8.0648	103.123	104.039	106.797	280.496	1.36313	C14 H14 O3	4-methoxy-12-methylene-10-oxatricyclo7.3.1.02,7trideca-2,4,6-trien-11-one	140 K	None	None	None	None	None	None	None	Xubin Wang, Xiaoming Wang, Zhaobin Han, Zheng Wang, Kuiling Ding
BAZHAM	ACHIRAL	+ achiral molecule	NO	NO	P1	1	TRUE	FALSE	3.46	0	0	0	No Chiral atom	0	0	0	0	0						8	8	8	NA	contains following chiral atom(s)No Chiral atom	NA	NA	4.524	7.339	29.207	89.98	90.02	89.93	969.719	1.04346	C2 H8 O1 Si1	Methoxymethylsilane	at 123 K	None	None	colorless	None	None	None	None	N.W.Mitzel
BDORLA10	CHIRAL	Enantiopure	NO	NO	P1	1	TRUE	FALSE	3.2	1	1	4	C	4	4	3	1	0	(1, RRSR)	1	1	chiral	C1	1	1	1	W1_enantiopure AU	contains following chiral atom(s)C	NA	NA	8.653	5.927	5.564	77.44	105.52	89.39	267.652	1.67631	C10 H10 N2 O7	7,2-Anhydro-Î²-D-arabinosyl-orotidine	None	None	None	None	None	None	None	None	J.L.Smith, A.Chwang, M.Sundaralingam
BEBHUN	CHIRAL	Enantiopure	NO	NO	P1	1	TRUE	FALSE	4.31	2	1	2	C	2	2	0	2	0	(2, S)	1	2	chiral	C1	2	2	2	Wa-could be Diast	contains following chiral atom(s)C	NA	NA	8.1985	10.6562	15.571	101.997	91.313	96.89	1319.43	1.2625	C31 H37 N1 O1 P2	(S)-6-Isopropyl-1,2-dimesityl-3-phenyl-1,2,5,6-tetrahydro1,3oxazolo2,3-e1,2,3azadiphosphole	at 173 K	None	None	colorless	None	None	hexanes	None	J.Dugal-Tessier, S.C.Serin, E.B.Castillo-Contreras, E.D.Conrad, G.R.Dake, D.P.Gates
BEDBET	CHIRAL	Enantiopure	NO	NO	P1	1	TRUE	FALSE	3.63	1	1	3	C	3	3	2	1	0	(1, SRR)	1	1	chiral	C1	1	1	1	W1_enantiopure AU	contains following chiral atom(s)C	NA	NA	10.39	10.4866	12.0159	71.638	75.642	62.998	1098.53	1.10522	C47 H62 O3 Si2	5-((t-Butyl(dimethyl)silyl)oxy)-6-(2-(dimethyl(phenyl)silyl)ethyl)-3-methyl-2-(5-(trityloxy)pentan-2-yl)cyclohex-2-en-1-one	at 198 K	None	None	colorless	None	None	None	None	J.Merten, Yuzhou Wang, T.Krause, O.Kataeva, P.Metz
BEDGOK	CHIRAL	Enantiopure	NO	NO	P1	1	TRUE	FALSE	2.59	2	1	2	C	2	2	2	0	0	(2, R)	1	2	chiral	C1	2	2	2	Wa-could be Diast	contains following chiral atom(s)C	NA	NA	6.02205	10.9893	13.5483	76.0394	84.6111	78.5505	851.802	1.36237	C16 H20 F1 N5 O1 S1	(R)-N-5-({3-(5-fluoropyrimidin-2-yl)methylpiperidin-1-yl}methyl)-1,3-thiazol-2-ylacetamide	100 K	None	437 K	colorless	None	None	tetrahydrofuran	None	Bo Wang, J.F.Bruhn, A.Weldeab, T.S.Wilson, P.T.McGilvray, M.Mashore, Qiong Song, G.Scapin, Yiqing Lin
BEFDIC	CHIRAL	Enantiopure	NO	NO	P1	1	TRUE	FALSE	4.27	2	1	2	C	2	2	0	2	0	(2, S)	1	2	chiral	C1	2	2	2	Wa-could be Diast	contains following chiral atom(s)C	NA	NA	8.5057	8.5593	9.4977	102.001	101.812	97.7165	650.635	1.32859	C15 H16 O4	(Z)-2,4-dihydroxy-3-methyl-6-(((S)-6-methyl-5,6-dihydro-2H-pyran-2-ylidene)methyl)benzaldehyde	293 K	None	441-443 K	yellow	None	None	None	None	Li-Ying Ma, De-Sheng Liu, De-Guo Li, Yu-Ling Huang, Hui-Hui Kang, Chun-Hua Wang, Wei-Zhong Liu
BEGLUY	CHIRAL	Enantiopure	NO	NO	P1	1	TRUE	FALSE	4.91	2	1	16	C	16	12	8	8	0	(2, RRSSSRSR)	1	2	chiral	C1	2	2	2	Wa-could be Diast	contains following chiral atom(s)C	NA	NA	7.6399	10.6178	15.7261	85.376	76.273	85.631	1233.07	1.08448	C27 H46 O2	25-hydroxycholesterol	173 K	None	None	colorless	None	None	None	None	H.Ali, J.E.van Lier
BEHFAW	CHIRAL	Enantiopure	NO	NO	P1	1	TRUE	FALSE	4.61	2	1	8	C	8	8	4	4	0	(2, SRSR)	1	2	chiral	C1	2	2	2	Wa-could be Diast	contains following chiral atom(s)C	NA	NA	9.3044	9.9061	16.2873	73.005	82.729	89.475	1423.49	1.17286	C31 H38 O4 Si1	(1S,2R)-2-((t-Butyl(diphenyl)silyl)oxy)-1-((2R,6S)-6-ethoxy-5,6-dihydro-2H-pyran-2-yl)-2-phenylethanol	at 293 K	None	412 K	colorless	None	None	None	None	M.Deligny, F.Carreaux, L.Toupet, B.Carboni
BEKHUU	CHIRAL	Enantiopure	NO	NO	P1	1	TRUE	FALSE	3.8	1	1	8	C	8	5	4	4	0	(1, RRSSRRSS)	1	1	chiral	C1	1	1	1	W1_enantiopure AU	contains following chiral atom(s)C	NA	NA	9.204	11.977	6.278	102.9	105.43	101.39	625.508	1.23347	C30 H40 O4	3Î²-Benzyloxy-17Î±-hydroxy-5Î²,14Î²-isocard-20(22)-enolide	None	None	470-471K	colorless	None	None	None	None	F.R.Ahmed, M.Przybylska
BENVIC	CHIRAL	Enantiopure	NO	NO	P1	1	TRUE	FALSE	3.08	2	1	2	C	2	2	0	2	0	(2, S)	1	2	chiral	C1	2	2	2	Wa-could be Diast	contains following chiral atom(s)C	NA	NA	8.32646	10.4746	13.7682	110.587	96.9805	91.5538	1112.63	1.19253	C27 H29 N1 O2	(2-(4-isopropyl-5,5-dimethyl-4,5-dihydro-1,3-oxazol-2-yl)phenyl)(diphenyl)methanol	100 K	None	None	colorless	None	None	None	None	Chris Nottingham, R.Benson, H.Muller-Bunz, P.J.Guiry
BEPGOU	CHIRAL	Enantiopure + achiral molecule	NO	NO	P1	1	TRUE	FALSE	2.96	2	1	6	C	6	4	2	4	0	(2, SRS)	1	2	chiral	C1	3	1	1	Wa-could be Diast	contains following chiral atom(s)C	NA	NA	9.1347	10.0013	13.383	105.698	96.765	90.586	1167.72	1.33811	2(C26 H20 N2 O5),C3 H8 O1	trans-6-(4-Nitrophenyl)-2,10-diphenyl-3-oxa-1-azaspiro4.5dec-1-ene-4,8-dione propan-2-ol	at 100 K	None	None	colorless	None	None	None	None	M.Weber, Wolfgang Frey, R.Peters
BEPXEC	CHIRAL	Enantiopure	NO	NO	P1	1	TRUE	FALSE	3.43	2	1	18	C	18	14	10	8	0	(2, RRSRRSSSR)	1	2	chiral	C1	2	2	2	Wa-could be Diast	contains following chiral atom(s)C	NA	NA	7.3783	9.3489	21.4724	96.018	94.877	90.646	1467.34	1.24663	C32 H46 N4 O2 S1	methyl 3-(1-phenyl-1H-tetrazol-5-yl)sulfanylcholan-24-oate	100 K	None	None	colorless	None	None	None	None	R.R.Merchant, J.T.Edwards, Tian Qin, M.M.Kruszyk, Cheng Bi, Guanda Che, Deng-Hui Bao, Wenhua Qiao, Lijie Sun, M.R.Collins, O.O.Fadeyi, G.M.Gallego, J.J.Mousseau, Philippe Nuhant, P.S.Baran
BEQJIQ	CHIRAL	Enantiopure + achiral molecule	NO	NO	P1	1	TRUE	FALSE	4.3	2	1	10	C	10	8	2	8	0	(2, SSRSS)	1	2	chiral	C1	3	2	2	Wa-could be Diast	contains following chiral atom(s)C	NA	NA	7.2989	9.2859	12.4017	89.4709	87.8567	70.768	793.08	1.2077	C18 H24 O2,0.5(C1 H4 O1)	Estradiol methanol solvate	at 100 K	None	None	colorless	None	None	None	None	D.A.Parrish, A.A.Pinkerton
BEQJIQ01	CHIRAL	Enantiopure + achiral molecule	NO	NO	P1	1	TRUE	FALSE	2.54	2	1	10	C	10	8	2	8	0	(2, SSRSS)	1	2	chiral	C1	3	2	2	Wa-could be Diast	contains following chiral atom(s)C	NA	NA	7.31144	9.2985	12.3778	89.7413	88.0129	70.786	794.135	1.2061	C18 H24 O2,0.5(C1 H4 O1)	estra-1,3,5(10)-triene-3,17-diol methanol solvate	150 K	None	None	colorless	None	None	methanol	None	E.L.Stevenson, R.W.Lancaster, A.B.M.Buanz, L.S.Price, D.A.Tocher, S.L.Price
BERNER	CHIRAL	Contains at least 2 different chemicals in enantiopure proportions	NO	NO	P1	1	TRUE	FALSE	4	2	2	2	C	2	2	1	1	0	(1, S), (1, R)	1, 1	1, 1	chiral, chiral	C1	2	1	1	W1_enantiopure AU	contains following chiral atom(s)C	NA	NA	5.1639	5.4076	13.1241	91.779	98.138	111.823	335.393	1.22943	C6 H13 N1 O2,C5 H11 N1 O2	L-Leucine D-2-aminopentanoic acid	at 150 K	None	None	colorless	None	None	water	None	B.Dalhus, C.H.Gorbitz
BERVEZ	CHIRAL	Enantiopure	NO	NO	P1	1	TRUE	FALSE	3.6	1	1	3	C	3	3	0	3	0	(1, SSS)	1	1	chiral	C1	1	1	1	W1_enantiopure AU	contains following chiral atom(s)C	NA	NA	9.977	10.21	8.828	90.68	106.44	63.82	767.32	1.25532	C27 H38 Cl1 N5 O7	Methyl N-p-chlorobenzoyl-L-prolyl-(Î±-aminoisobutyryl)-L-alanyl-(Î±-aminoisobutyryl)-L-alaninate	None	None	194deg.C	None	None	None	None	None	T.S.Cameron, A.W.Hanson, A.Taylor
BETJEP	CHIRAL	Enantiopure	NO	NO	P1	1	TRUE	FALSE	4.6	1	1	4	C	4	4	2	2	0	(1, RSSR)	1	1	chiral	C1	1	1	1	W1_enantiopure AU	contains following chiral atom(s)C	NA	NA	9.239	6.284	9.314	76.98	118.98	110.08	443.144	1.43693	C19 H18 N3 P1 S2	(1,1-Diphenyl-cyclo-1Î»5-phospha-3,5-dithia-2,4,6-triazine-S,S)-norbornadiene adduct	None	None	None	None	None	None	None	None	N.Burford, T.Chivers, A.W.Cordes, W.G.Laidlaw, M.C.Noble, R.T.Oakley, P.N.Swepston
BEWBAK	CHIRAL	Enantiopure	NO	NO	P1	1	TRUE	FALSE	3.22	1	1	2	C	2	2	1	1	0	(1, SR)	1	1	chiral	C1	1	1	1	W1_enantiopure AU	contains following chiral atom(s)C	NA	NA	5.4489	10.3707	11.36	69.953	84.96	79.003	591.798	1.19397	C25 H31 N1 O5	methyl 2-{(t-butoxycarbonyl)amino(4-methoxyphenyl)methyl}-5-phenylpent-4-enoate	150.2 K	None	None	colorless	None	None	None	None	Shun-Zhong Tan, Peng Chen, Lei Zhu, Meng-Qi Gan, Qin Ouyang, Wei Du, Ying-Chun Chen
BEWPOM	CHIRAL	Enantiopure	NO	NO	P1	1	TRUE	FALSE	3.03	4	1	36	C	36	24	8	28	0	(4, SSSSSRRSS)	1	4	chiral	C1	4	4	4	Wa-could be Diast	contains following chiral atom(s)C	NA	NA	11.5456	11.7637	17.2226	76.214	89.309	81.77	2247.78	1.18957	C25 H38 O4	5a-(hydroxymethyl)-1-(1-hydroxypropan-2-yl)-3a,9b-dimethyl-1,2,3,3a,4,5,5a,6,8,9,9a,9b,10,10a,10b,10c-hexadecahydrocyclopropaeindeno4,5-gazulene-7-carboxylic acid	293 K	None	None	None	None	None	None	None	Wencong Yang, Tao Chen, Yan Chen, Qi Tan, Yanghui Ou, Gang Li, Bo Wang, Dan Hu, Hongliang Yao, Zhigang She
BEXCHO	CHIRAL	Enantiopure	NO	NO	P1	1	TRUE	FALSE	4	2	1	18	C	18	12	8	10	0	(2, RRSSSSSRR)	1	2	chiral	C1	2	2	2	Wa-could be Diast	contains following chiral atom(s)C	NA	NA	10.873	13.841	11.037	75.19	78.79	101.57	1519.34	1.27575	C34 H47 Br1 O3	3Î²-p-Bromobenzoyloxy-14Î±,15Î±-epoxy-5Î±-cholest-7-ene	None	None	187-9deg.C	None	None	None	None	None	B.N.Conner, E.J.Parish, G.J.Schroepfer Junior, F.A.Quiocho
BEYFIV	CHIRAL	Enantiopure + achiral molecule	NO	NO	P1	1	TRUE	FALSE	3.54	4	1	8	C	8	4	4	4	0	(4, SR)	1	4	chiral	C1	5	4	4	Wa-could be Diast	contains following chiral atom(s)C	NA	NA	12.456	16.14	9.656	101.7	109.828	93.83	1768.74	1.15995	C18 H24 O4,0.25(H2 O1)	(2R,3S)-3-(6,7-Dimethoxy-2-naphthyl)-4-methyl-2,3-pentanediol hydrate	at 295.2 K	None	99.5-100.5deg.C	colorless	None	None	ethyl acetate/hexane	None	N.Matsunaga, T.Kaku, A.Ojida, A.Tasaka
BIBVAN	CHIRAL	Enantiopure	NO	NO	P1	1	TRUE	FALSE	3	1	1	7	C	7	6	5	2	0	(1, SRRRRRS)	1	1	chiral	C1	1	1	1	W1_enantiopure AU	contains following chiral atom(s)C	NA	NA	7.9586	7.9714	8.9963	104.955	96.484	119.348	460.806	1.29872	C20 H24 O6	methyl 5-hydroxy-4-methyl-1,6-dioxo-8-(prop-1-en-2-yl)-1,2a,3,5,5a,6,7,8,9,9a,9b,9c-dodecahydrobenzo5,6indeno1,7-bcfuran-5-carboxylate	150 K	None	None	colorless	None	None	None	None	Ci-Li Wang, Tian-Yun Jin, Xue-Huan Liu, Jia-Rui Zhang, Xing Shi, Meng-Fei Wang, RunFeng Huang, Yun Zhang, Ke-Chun Liu, Guo-Qiang Li
BIDWOD	CHIRAL	Enantiopure	NO	NO	P1	1	TRUE	FALSE	2.72	1	1	2	C	2	2	0	2	0	(1, SS)	1	1	chiral	C2	1	1	1	W1_enantiopure AU	contains following chiral atom(s)C	NA	NA	5.0903	6.0581	10.724	84.845	86.22	89.447	328.645	1.98086	C16 H8 Br2 O2	2,7-dibromo-4b,9b-dihydroindeno2,1-aindene-5,10-dione	100 K	None	None	colorless	None	None	None	None	M.Hermann, D.Wassy, D.Kratzert, B.Esser
BIFLAG	CHIRAL	Enantiopure	NO	NO	P1	1	TRUE	FALSE	2.94	1	1	1	C	1	1	1	0	0	(1, R)	1	1	chiral	C1	1	1	1	W2_enantiopure AU	contains following chiral atom(s)C	NA	NA	6.8637	7.8212	8.248	102.434	94.103	112.073	394.968	1.15806	C17 H25 N1 S1	2,2-dimethyl-1-(2-phenylazepan-1-yl)propane-1-thione	100 K	None	None	colorless	None	None	None	None	S.Greies, F.J.R.Klauck, Ju Hyun Kim, C.G.Daniliuc, F.Glorius
BIGFUU	CHIRAL	Enantiopure	NO	NO	P1	1	TRUE	FALSE	4.47	1	1	3	C P	2	2	1	2	0	(1, SSR)	1	1	chiral	C1	1	1	1	W1_enantiopure AU	contains following chiral atom(s)P,C	NA	NA	7.7674	9.3961	10.3181	94.823	108.859	110.954	648.286	1.20224	C29 H33 B1 N1 O2 P1	2-(((Borane)(2-methoxybiphenyl-2-yl)phenylphosphoranylidene)(methyl)amino)-1-phenylpropan-1-ol	at 150 K	None	None	colorless	None	None	None	None	B.Mohar, A.Cusak, B.Modec, M.Stephan
BIHCAZ	CHIRAL	Enantiopure	NO	NO	P1	1	TRUE	FALSE	2.72	2	1	6	C	6	2	0	6	0	(2, SSS)	1	2	chiral	C1	2	2	2	Wa-could be Diast	contains following chiral atom(s)C	NA	NA	9.332	10.9097	12.6859	92.765	96.95	104.585	1236.57	1.4358	C26 H22 N4 O5 S2	1-methyl-4-(4-methylphenyl)sulfonyl-3-(methylsulfanyl)-3a-nitro-4,8b-dihydro-3aH-spiroindole-3,1-pyrrolo3,4-bindol-2(1H)-one	100 K	None	None	colorless	None	None	None	None	Jian-Qiang Zhao, Xiao-Jian Zhou, Yong-Zheng Chen, Xiao-Ying Xu, Xiao-Mei Zhang, Wei-Cheng Yuan
BIHHAD	CHIRAL	Enantiopure + achiral molecule	NO	NO	P1	1	TRUE	FALSE	4.07	1	1	4	C	4	4	4	0	0	(1, RRRR)	1	1	chiral	C1	3	1	1	W1_enantiopure AU	contains following chiral atom(s)C	NA	NA	9.822	9.849	10.995	95.962	112.616	106.985	910.412	1.17599	C36 H34 O6,2(C2 H3 N1)	2,5-bis(benzyloxy)-3,4-bis(2-phenylvinyl)hexanedioic acid acetonitrile solvate	at 173 K	None	None	colorless	None	None	None	None	K.S.Feldman, B.R.Selfridge
BIHKAG	ACHIRAL	+ achiral molecule	NO	NO	P1	1	TRUE	FALSE	1.63	0	0	0	No Chiral atom	0	0	0	0	0						4	2	2	NA	contains following chiral atom(s)No Chiral atom	NA	NA	8.2414	9.3417	9.8011	94.71	114.659	105.507	644.439	1.83542	C14 H11 I1 O2,H2 O1	1-(4-Methylphenyl)-1,2-benziodoxol-3(1H)-one monohydrate	at 123 K	None	None	colorless	None	None	None	None	M.S.Yusubov, Roza Y.Yusubova, V.N.Nemykin, V.V.Zhdankin
BIHTAR	ACHIRAL	+ achiral molecule	NO	NO	P1	1	TRUE	FALSE	4.39	0	0	0	No Chiral atom	0	0	0	0	0						2	2	2	NA	contains following chiral atom(s)No Chiral atom	NA	NA	11.9217	12.1367	12.2571	75.268	60.978	89.926	1484.1	1.24561	C40 H29 O1 P1	1-(diphenylmethylidene)-2-phenyl-1H-inden-3-yldiphenylphosphine oxide	273 K	None	None	red	None	None	None	None	S.Hore, Abhijeet Singh, R.P.Singh
BIHVUJ	CHIRAL	Enantiopure	NO	NO	P1	1	TRUE	FALSE	4.6	4	1	24	C	24	16	16	8	0	(4, RSRRSR)	1	4	chiral	C1	4	4	4	Wa-could be Diast	contains following chiral atom(s)C	NA	NA	16.211	16.366	17.637	63.63	76.68	75.41	4019.09	1.47997	C41 H43 Br3 N4 O4	(9R)-9-Hydroxydichotoma-2,14-diene-19,20-dial 4-bromobenzoate bis(4-bromobenzoic acid hydrazide)	None	None	478-479 K	None	None	None	None	None	J.F.Blount, R.W.Dunlop, K.L.Erickson, R.J.Wells
BILJIR	CHIRAL	Enantiopure	NO	NO	P1	1	TRUE	FALSE	4.43	2	1	2	C	2	2	2	0	0	(2, R)	1	2	chiral	C1	2	2	2	Wa-could be Diast	contains following chiral atom(s)C	NA	NA	8.4528	8.5689	12.4424	87.84	72.284	87.368	857.307	1.31475	C18 H21 N5 O2	2-((6-(3R)-3-Aminopiperidin-1-yl-3-methyl-2,4-dioxo-1,2,3,4-tetrahydropyrimidin-1-yl)methyl)benzonitrile	173 K	None	None	colorless	None	None	None	None	T.Gelbrich, V.Kahlenberg, U.J.Griesser
BILJIR01	CHIRAL	Enantiopure	NO	NO	P1	1	TRUE	FALSE	3.74	2	1	2	C	2	2	2	0	0	(2, R)	1	2	chiral	C1	2	2	2	Wa-could be Diast	contains following chiral atom(s)C	NA	NA	8.5041	8.6099	12.5755	88.008	72.246	87.344	875.771	1.28703	C18 H21 N5 O2	2-((6-((3R)-3-Aminopiperidin-1-yl)-3-methyl-2,4-dioxo-3,4-dihydropyrimidin-1(2H)-yl)methyl)benzonitrile	233 K	None	None	colorless	None	None	dichloromethane	None	G.Laus, K.Wurst, H.Schottenberger
BINFEN	CHIRAL	Enantiopure	NO	NO	P1	1	TRUE	FALSE	4.32	1	1	2	C	2	2	2	0	0	(1, RR)	1	1	chiral	C1	1	1	1	W1_enantiopure AU	contains following chiral atom(s)C	NA	NA	9.6227	11.8766	12.5108	71.825	82.689	87.595	1347.41	1.23886	C74 H56 N2 O2	2,5-bis(1-phenylethyl)-3,6-bis4-(triphenylethenyl)phenyl-2,5-dihydropyrrolo3,4-cpyrrole-1,4-dione	295 K	None	None	orange	None	None	None	None	M.M.Talamo, T.Cauchy, Flavia Pop, F.Zinna, L.Di Bari, N.Avarvari
BINHEO	CHIRAL	Enantiopure	NO	NO	P1	1	TRUE	FALSE	4.65	2	1	2	C	2	2	0	2	0	(2, S)	1	2	chiral	C1	2	2	2	Wa-could be Diast	contains following chiral atom(s)C	NA	NA	6.014	8.236	26.34	94.127	93.176	95.222	1293.35	1.34451	C30 H25 N3 O4 S1	N-benzyl-4-{5-(2-nitrophenyl)methyl-4-oxo-2,3,4,5-tetrahydro-1,5-benzothiazepin-2-yl}benzamide	293 K	None	None	colorless	None	None	None	None	Yang Gao, Peng Zhang, Anfeng Cui, De-Yong Ye, Meng Xiang, Yong Chu
BINLAO	CHIRAL	Enantiopure + achiral molecule	NO	NO	P1	1	TRUE	FALSE	3.64	1	1	2	C	2	2	2	0	0	(1, RR)	1	1	chiral	C2	2	1	1	W1_enantiopure AU	contains following chiral atom(s)C	NA	NA	8.2222	8.6821	10.3388	100.217	111.765	96.176	662.318	1.28773	C28 H26 O4,C4 H9 N1 O1	(+)-(2R,3R)-1,1,4,4-tetraphenylbutane-1,2,3,4-tetraol tetrahydro-1,4-oxazine clathrate	200 K	None	420.15 K	colorless	None	None	Re-crystallisation from solvent: morpholine	None	B.Barton, Sasha-Lee Dorfling, E.C.Hosten
BIPBOR	CHIRAL	Enantiopure	NO	NO	P1	1	TRUE	FALSE	4.8	2	1	6	C	6	6	2	4	0	(2, RSS)	1	2	chiral	C1	2	2	2	Wa-could be Diast	contains following chiral atom(s)C	NA	NA	12.96	15.162	8.313	92.38	93.19	68.07	1512.57	1.27504	C35 H40 N4 O4	4,5-Diethyl-methyl-bacteriopheophorbide D	None	None	215-6deg.C	None	None	None	None	None	K.M.Smith, D.A.Goff, J.Fajer, K.M.Barkigia
BIPPEV	CHIRAL	Enantiopure	NO	NO	P1	1	TRUE	FALSE	4.3	1	1	2	C	2	2	2	0	0	(1, RR)	1	1	chiral	C1	1	1	1	W1_enantiopure AU	contains following chiral atom(s)C	NA	NA	5.007	5.492	6.358	68.2	82.76	68.37	150.889	1.78388	C5 H6 O6	D-Erythronic acid 3,4-carbonate	at -150 deg.C	None	None	None	None	None	None	None	T.O.Moen
BISREC	CHIRAL	Enantiopure	NO	NO	P1	1	TRUE	FALSE	4.6	4	1	8	C	8	4	8	0	0	(4, RR)	1	4	chiral	C1	4	4	4	Wa-could be Diast	contains following chiral atom(s)C	NA	NA	8.4913	15.3678	17.3672	64.581	79.69	74.576	1967.7	1.52352	C19 H19 Br1 N2 O4 S1	(3aR,8aR)-Methyl 3a-bromo-8-p-tosyl-3,3a,8,8a-tetrahydropyrrolo2,3-bindole-1(2H)-carboxylate	at 293 K	None	None	colorless	None	None	None	None	Weiqing Xie, Guangde Jiang, Huan Liu, Jiadong Hu, Xixian Pan, Hui Zhang, Xiaolong Wan, Yisheng Lai, D.Ma
BISWOS	CHIRAL	Enantiopure	NO	NO	P1	1	TRUE	FALSE	4.58	1	1	4	C	4	4	2	2	0	(1, RRSS)	1	1	chiral	C1	1	1	1	W1_enantiopure AU	contains following chiral atom(s)C	NA	NA	5.7776	6.4485	12.4143	96.716	91.948	112.53	422.718	1.4551	C16 H22 N2 O6 S1	3,5,6-trihydroxy-N,N-dimethyl-4-{(4-methylphenyl)sulfonylamino}cyclohex-1-ene-1-carboxamide	150 K	None	None	colorless	None	None	None	None	M.Dlugosch, Xinghua Ma, Shuxin Yang, M.G.Banwell, Chenxi Ma, J.S.Ward, Paul Carr
BISXEJ	CHIRAL	Enantiopure	NO	NO	P1	1	TRUE	FALSE	4.38	1	1	4	C	4	4	2	2	0	(1, RSRS)	1	1	chiral	C1	1	1	1	W1_enantiopure AU	contains following chiral atom(s)C	NA	NA	7.2377	8.234	9.9721	99.215	108.174	105.551	524.328	1.17667	C18 H33 N1 O5 Si1	N-5-{t-butyl(dimethyl)silyloxy}-7-(hydroxymethyl)-2,2-dimethyl-3a,4,5,7a-tetrahydro-2H-1,3-benzodioxol-4-ylacetamide	150 K	None	None	colorless	None	None	None	None	M.Dlugosch, Xinghua Ma, Shuxin Yang, M.G.Banwell, Chenxi Ma, J.S.Ward, Paul Carr
BIVLIC	CHIRAL	Enantiopure	NO	NO	P1	1	TRUE	FALSE	3.66	4	1	20	C	20	16	4	16	0	(4, SRSSS)	1	4	chiral	C1	4	4	4	Wa-could be Diast	contains following chiral atom(s)C	NA	NA	7.3039	14.089	16.521	111.1	90.499	101.715	1546.82	1.06665	C17 H28 O1	9-(3-hydroxypropenyl)-4,8,8-trimethyldecahydro-1,4-methanoazulene	at 100 K	None	None	None	None	None	None	None	I.Bichlmaier, M.Kurkela, T.Joshi, A.Siiskonen, T.Ruffer, H.Lang, B.Suchanova, M.Vahermo, M.Finel, J.Yli-Kauhaluoma
BIXHAS	CHIRAL	Enantiopure	NO	NO	P1	1	TRUE	FALSE	3.81	2	1	4	C	4	4	0	4	0	(2, SS)	1	2	chiral	C1	2	2	2	Wa-could be Diast	contains following chiral atom(s)C	NA	NA	11.2102	11.9695	15.9252	93.528	109.934	91.618	2002.26	1.29526	C54 H40 N2 O4	N,N-bis(9-Anthrylcarbonyl)-N,N-((S)-1-phenylethyl)terephthalamide	at 150 K	None	477-479 K	yellow	None	None	None	None	S.Kohmoto, H.Takeichi, K.Kishikawa, H.Masu, I.Azumaya
BIXHOF	CHIRAL	Enantiopure	NO	NO	P1	1	TRUE	FALSE	3.9	1	1	6	C	6	5	3	3	0	(1, SSRSRR)	1	1	chiral	C1	1	1	1	W1_enantiopure AU	contains following chiral atom(s)C	NA	NA	7.796	9.815	10.746	115.64	97.7	101.37	704.019	1.3223	C27 H32 N2 O9 S1	Methyl-2-((1R,3S,4R,5S,6S,8R)-3-benzyl-4,5-bis(methoxycarbonyl)-6-ethoxycarbonyl-9-oxo-7,10-diaza-2-thiatricyclo(6.2.0.03,7)decan-10-yl)-3-methylbut-2-enoate	None	None	411-412 K	None	None	None	None	None	A.M.Mara, O.Singh, E.J.Thomas, D.J.Williams
BIZMIJ	CHIRAL	Enantiopure	NO	NO	P1	1	TRUE	FALSE	3.91	2	1	2	C	2	2	2	0	0	(2, R)	1	2	chiral	C1	2	2	2	Wa-could be Diast	contains following chiral atom(s)C	NA	NA	9.0036	10.9036	11.9944	103.063	98.741	91.068	1132	1.3336	C23 H22 N2 O4 S2	N-3-cyano-3-(4-methylphenyl)propyl-N-(phenylsulfonyl)benzenesulfonamide	298 K	None	None	light colorless	None	None	None	None	Shengbiao Yang, Lihong Wang, Hongwei Zhang, Chunyang Liu, Linli Zhang, Xiaomin Wang, Ge Zhang, Yan Li, Qian Zhang
BOBMAH	CHIRAL	Enantiopure	NO	NO	P1	1	TRUE	FALSE	4.41	2	1	4	C	4	4	0	4	0	(2, SS)	1	2	chiral	C1	2	2	2	Wa-could be Diast	contains following chiral atom(s)C	NA	NA	5.731	9.956	11.765	106.35	96.43	100.74	623.153	1.24317	C13 H15 N1 O3	(5S,6S)-5-Methoxycarbonyl-6-phenylpiperidin-2-one	at 293 K	None	388 K	colorless	None	None	ethyl acetate/hexane	None	N.M.Garrido, M.Garcia, D.Diez, M.R.Sanchez, F.Sanz, J.G.Urones
BOBQUG	CHIRAL	Enantiopure + achiral molecule	NO	NO	P1	1	TRUE	FALSE	2.7	4	1	4	C	4	4	4	0	0	(4, R)	1	4	chiral	C1	6	2	2	Wa-could be Diast	contains following chiral atom(s)C	NA	NA	6.502	7.522	20.6532	97.77	91.964	90.557	1000.14	1.41597	2(C8 H8 O3),C6 H6 N2 O1	hydroxy(phenyl)acetic acid nicotinamide	100 K	None	None	colorless	None	None	None	None	Si-Wei Zhang, M.T.Harasimowicz, M.M.de Villiers, Lian Yu
BODBOO	CHIRAL	Enantiopure	NO	NO	P1	1	TRUE	FALSE	3.55	2	1	6	C	6	6	2	4	0	(2, SSR)	1	2	chiral	C1	2	2	2	Wa-could be Diast	contains following chiral atom(s)C	NA	NA	8.6218	10.265	12.8723	100.308	95.482	97.548	1102.83	1.20297	C21 H31 F2 N1 O4	7-((R)-3,3-difluoro-5-((3S,4S,E)-3-hydroxy-4-methylnon-1-en-6-yn-1-yl)-2-oxopyrrolidin-1-yl)heptanoic acid	173 K	None	None	colorless	None	None	dichloromethane	None	S.D.Barrett, M.C.Holt, J.B.Kramer, B.Germain, C.S.Ho, F.L.Ciske, A.Kornilov, J.M.Colombo, A.Uzieblo, J.P.OMalley, T.A.Owen, A.J.Stein, M.I.Morano
BOGCOS	CHIRAL	Enantiopure	NO	NO	P1	1	TRUE	FALSE	4.37	1	1	4	C N	3	2	2	2	0	(1, RSRS)	1	1	chiral	C1	1	1	1	W1_enantiopure AU	contains following chiral atom(s)C,N	NA	NA	5.9667	8.5345	10.417	87.38	87.11	80.44	522.055	1.21274	C22 H28 B1 N1 O4	(dimethyl 1-ethylidene-9b-methyl-10-methylidene-1,2,3a,4,5,9b-hexahydro-3,5-ethanobenzoeindole-6,7-dicarboxylate)(trihydrido)boron	113.2 K	None	None	whiteish colorless	None	None	None	None	Meng Deng, Yanmin Yao, Xiaohu Li, Nan Li, Xiao Zhang, Guangxin Liang
BOGZOO	CHIRAL	Enantiopure	NO	NO	P1	1	TRUE	FALSE	4.22	1	1	1	C	1	0	0	1	0	(1, S)	1	1	chiral	C1	1	1	1	W2_enantiopure AU	contains following chiral atom(s)C	NA	NA	7.354	8.433	9.291	71.877	79.797	69.628	511.822	1.46102	C24 H20 Br1 N1 O3	methyl 2-(4-bromobenzoyl)-1-phenyl-1,2,3,4-tetrahydroisoquinoline-1-carboxylate	at 97 K	None	None	colorless	None	None	None	None	Xiabing Li, I.Coldham
BOHXUR	CHIRAL	Enantiopure	NO	NO	P1	1	TRUE	FALSE	5	2	1	22	C	22	20	12	10	0	(2, RRRSRRRSSSS)	1	2	chiral	C1	2	2	2	Wa-could be Diast	contains following chiral atom(s)C	NA	NA	9.914	13.678	11.105	67.85	74	73.99	1315.49	1.38233	C24 H37 N1 O13	7-Desoxy-1,2:3,4:8,9:11,12-tetra-O-isopropylidene-7-nitro-Î²-D-manno-D-glycero-Î±-D-galacto-dodeco-1,5-pyranos-7-ulo-7,10-furanose	None	None	158-60deg.C	colorless	None	None	None	None	B.Aebischer, J.H.Bieri, R.Prewo, A.Vasella
BOHZOO01	ACHIRAL	+ achiral molecule	NO	NO	P1	1	TRUE	FALSE	3.23	0	0	0	No Chiral atom	0	0	0	0	0						1	1	1	NA	contains following chiral atom(s)No Chiral atom	NA	NA	4.8809	7.0553	8.463	78.927	76.14	77.063	272.799	1.469	C9 H11 N3 O1 S2	Ethyl N-(3-pyridinecarbonyl)hydrazinedithioate	at 173 K	None	None	dark yellow	P1 triclinic polymorph	None	methanol	None	M.Singh, R.J.Butcher, N.K.Singh
BOKVAB	CHIRAL	Enantiopure	NO	NO	P1	1	TRUE	FALSE	1.93	1	1	2	C	2	2	1	1	0	(1, SR)	1	1	chiral	C1	1	1	1	W1_enantiopure AU	contains following chiral atom(s)C	NA	NA	5.1962	9.0695	9.5843	95.884	105.505	96.053	428.769	1.48142	C13 H22 N2 O5 S3	4-(ethylamino)-6-(3-methoxypropyl)-7,7-dioxo-4,5,6,7-tetrahydro-7Î»6-thieno2,3-bthiopyran-2-sulfonamide	100.2 K	None	None	colorless	None	None	None	None	A.L.Rheingold
BOKYAD	CHIRAL	Enantiopure	NO	NO	P1	1	TRUE	FALSE	2.47	1	1	4	C	4	4	3	1	0	(1, RRSR)	1	1	chiral	C1	1	1	1	W1_enantiopure AU	contains following chiral atom(s)C	NA	NA	5.0392	5.4022	7.5864	99.295	102.547	102.956	191.601	1.5093	C7 H10 O5	6-Hydroxyhexahydrofuro3,2-bfuran-3-carboxylic acid	100 K	None	None	colorless	None	None	None	None	S.Thiyagarajan, Jing Wu, R.J.I.Knoop, J.van Haveren, M.Lutz, D.S.van Es
BONPOM	CHIRAL	Enantiopure	NO	NO	P1	1	TRUE	FALSE	4.65	2	1	6	C	6	4	0	6	0	(2, SSS)	1	2	chiral	C1	2	2	2	Wa-could be Diast	contains following chiral atom(s)C	NA	NA	7.5537	12.8817	13.5102	107.124	94.728	90.025	1251.63	1.46449	C27 H22 Cl1 N3 O8	ethyl 1-benzyl-5-chloro-1-hydroxy-5,7-dinitro-2-oxo-1,2,3,4-tetrahydro-1H-spiroindole-3,2-naphthalene-3-carboxylate	150 K	None	None	colorless	None	None	None	None	Biao Wang, Xiao-Hui Wang, Wei Huang, Jin Zhou, Hong-Ping Zhu, Cheng Peng, Bo Han
BONXAF	CHIRAL	Enantiopure	NO	NO	P1	1	TRUE	FALSE	3.68	2	1	12	C	12	8	6	6	0	(2, SRRSSR)	1	2	chiral	C1	2	2	2	Wa-could be Diast	contains following chiral atom(s)C	NA	NA	7.5745	8.1556	14.9064	74.991	84.522	71.324	842.51	1.27086	C20 H22 N2 O2	15-Ethyl-13-methyl-19-oxa-3,13-diazahexacyclo14.3.1.02,10.04,9.010,15.012,17icosa-2,4,6,8-tetraen-14-one	at 293 K	None	None	None	None	None	None	None	Wei Zhang, Sheng-Yuan Zhang, Zhi-Qi Yin, Lei Wang, Wen-Cai Ye
BORCUJ	CHIRAL	Enantiopure	NO	NO	P1	1	TRUE	FALSE	4.49	2	1	6	C	6	4	2	4	0	(2, SSR)	1	2	chiral	C1	2	2	2	Wa-could be Diast	contains following chiral atom(s)C	NA	NA	10.596	11.6796	12.6988	69.855	70.549	88.791	1383.42	1.35639	C33 H25 Cl1 N2 O5	ethyl 5-chloro-5-(3-cyano-2-oxo-2H-1-benzopyran-4-yl)-1-ethyl-2-oxo-4-phenyl-1,2-dihydrospirocyclopent-2-ene-1,3-indole-2-carboxylate	293 K	None	None	colorless	None	None	None	None	Zhen-Hua Wang, Chuan-Wen Lei, Xia-Yan Zhang, Yong You, Jian-Qiang Zhao, Wei-Cheng Yuan
BORFAR	CHIRAL	Enantiopure	NO	NO	P1	1	TRUE	FALSE	4.95	2	1	4	C	4	4	4	0	0	(2, RR)	1	2	chiral	C1	2	2	2	Wa-could be Diast	contains following chiral atom(s)C	NA	NA	4.8784	10.6424	15.881	99.955	96.953	90.633	805.69	1.65767	C14 H12 Cl2 F3 N1 O5	3-(((2,2,2-trifluoroethoxy)carbonyl)amino)tetrahydrofuran-2-yl 2,4-dichlorobenzoate	at 110 K	None	None	colorless	None	None	dichloromethane	None	Deng-Fu Lu, Cheng-Liang Zhu, Zhen-Xin Jia, Hao Xu
BOTSAE	CHIRAL	Enantiopure	NO	NO	P1	1	TRUE	FALSE	4.3	1	1	3	C	3	1	1	2	0	(1, SSR)	1	1	chiral	C1	1	1	1	W1_enantiopure AU	contains following chiral atom(s)C	NA	NA	7.862	6.667	6.492	109.38	96.25	103.63	305.4	1.21955	C13 H20 O3	5Î²,7aÎ±-Dimethyl-2,3,3aÎ±,4,5,6,7,7a-octahydro-1-oxo-1H-indene-5Î±-acetic acid	None	None	None	None	None	None	None	None	V.Bertolasi, V.Ferretti, G.Gilli
BOVTUD	CHIRAL	Enantiopure	NO	NO	P1	1	TRUE	FALSE	3.2	2	1	2	C	2	2	0	2	0	(2, S)	1	2	chiral	C1	2	2	2	Wa-could be Diast	contains following chiral atom(s)C	NA	NA	9.8359	10.161	10.307	76.557	73.136	64.754	884.585	1.43142	C20 H17 Br1 N2 O1	(4-Bromobenzyl)(2-methyl-3-oxo-3-phenylpropyl)malononitrile	at 173.2 K	None	None	colorless	None	None	None	None	Niankai Fu, Long Zhang, Sanzhong Luo, Jin-Pei Cheng
BOXQUC	CHIRAL	Enantiopure	NO	NO	P1	1	TRUE	FALSE	2.92	2	1	4	C	4	4	2	2	0	(2, SR)	1	2	chiral	C1	2	2	2	Wa-could be Diast	contains following chiral atom(s)C	NA	NA	5.6104	10.4247	17.4478	97.532	92.603	90.112	1010.58	1.25707	C22 H26 N2 O2 S1	t-butyl (2-(1,3-benzothiazol-2-yl)-1-(2-methylphenyl)propyl)carbamate	at 120 K	None	None	colorless	None	None	n-hexane/ethyl acetate	None	B.Choi, A.Saxena, J.J.Smith, G.H.Churchill, A.Nadin, Hon Wai Lam
BUBCEJ	CHIRAL	Enantiopure	NO	NO	P1	1	TRUE	FALSE	2.57	2	1	14	C	14	10	8	6	0	(2, SSRSRRR)	1	2	chiral	C1	2	2	2	Wa-could be Diast	contains following chiral atom(s)C	NA	NA	8.4527	8.9734	11.6418	76.79	82.704	80.16	843.445	1.34039	C20 H24 N2 O3	1-(5,7,16-trimethyl-9,19-dioxa-6,17-diazahexacyclo10.6.1.01,10.02,6.08,18.013,17nonadeca-2,4,13,15-tetraen-10-yl)ethanol	296 K	None	None	None	None	None	None	None	Guang Zhi Dai, Wen Bo Han, Ya Ning Mei, Kuang Xu, Rui Hua Jiao, Hui Ming Ge, Ren Xiang Tan
BUCWON	CHIRAL	Enantiopure	NO	NO	P1	1	TRUE	FALSE	2.49	2	1	2	C	2	2	0	2	0	(2, S)	1	2	chiral	C1	2	2	2	Wa-could be Diast	contains following chiral atom(s)C	NA	NA	9.4814	11.7644	11.8195	77.094	80.521	70.692	1206.87	1.38955	C28 H25 Cl1 N2 O5	N-((1-(4-chlorobenzoyl)-5-methoxy-2-methyl-1H-indol-3-yl)acetyl)phenylalanine	at 296 K	None	None	colorless	None	None	None	None	R.Roy, J.Deb, S.S.Jana, P.Dastidar
BUFBAI	CHIRAL	Enantiopure	NO	NO	P1	1	TRUE	FALSE	2.8	1	1	1	C	1	1	1	0	0	(1, R)	1	1	chiral	C1	1	1	1	W2_enantiopure AU	contains following chiral atom(s)C	NA	NA	6.3038	6.3132	8.9887	95.676	95.64	114.532	319.978	1.46509	C12 H14 N2 O4 S1	2-ethenyl-1-(4-nitrophenyl)sulfonylpyrrolidine	100 K	None	None	colorless	None	None	n-heptane / ethanol	None	D.Berthold, A.G.A.Geissler, S.Giofre, B.Breit
BUGSUT	CHIRAL	Enantiopure	NO	NO	P1	1	TRUE	FALSE	4.08	2	1	2	C	2	0	2	0	0	(2, R)	1	2	chiral	C1	2	2	2	Wa-could be Diast	contains following chiral atom(s)C	NA	NA	5.8903	10.4209	16.182	93.587	91.275	98.55	979.823	1.5297	C24 H19 Br1 O4	Diphenylmethyl (R)-2-(3-bromophenyl)-5-oxotetrahydrofuran-2-carboxylate	103 K	None	391-392 K	colorless	None	None	dichloromethane/n-hexane	None	Zhichao Jin, Ke Jiang, Zhenqian Fu, J.Torres, Pengcheng Zheng, Song Yang, Bao-An Song, Yonggui Robin Chi
BUJTUY	CHIRAL	Enantiopure	NO	NO	P1	1	TRUE	FALSE	2.57	1	1	4	C	4	3	4	0	0	(1, RRRR)	1	1	chiral	C1	1	1	1	W1_enantiopure AU	contains following chiral atom(s)C	NA	NA	6.8186	8.0372	8.2721	91.201	108.501	100.6	421.033	1.41345	C20 H22 O6	methyl 6-(2-(furan-3-yl)-2-oxoethyl)-7-methyl-2-oxo-3,4,5,5a,6,7,8,8a-octahydro-2H-naphtho1,8-bcfuran-6-carboxylate	101 K	None	None	colorless	None	None	None	None	Wei Li, Rui-Min Wang, Yue-Hua Pan, Ying-Yuan Zhao, Fang-Yu Yuan, Dong Huang, Gui-Hua Tang, Hui-Chang Bi, Sheng Yin
BUKNIG	CHIRAL	Enantiopure	NO	NO	P1	1	TRUE	FALSE	4.36	2	1	2	C	2	2	0	2	0	(2, S)	1	2	chiral	C1	2	2	2	Wa-could be Diast	contains following chiral atom(s)C	NA	NA	8.6291	9.4332	12.4474	82.659	70.506	68.236	887.045	1.36821	C18 H23 N1 O5 S1	N-(2-phenyl-2-(2,4,6-trimethoxyphenyl)ethyl)methanesulfonamide	150.0 K	None	None	colorless	None	None	None	None	N.Hsueh, G.J.Clarkson, M.Shipman
BULWIR	CHIRAL	Enantiopure	NO	NO	P1	1	TRUE	FALSE	4.93	4	1	16	C	16	16	8	8	0	(4, SRRS)	1	4	chiral	C1	4	4	4	Wa-could be Diast	contains following chiral atom(s)C	NA	NA	10.4928	10.9595	18.3029	73.12	78.857	64.829	1816.9	1.71178	C18 H17 I1 N2 O5	methyl 6-(1,3-dioxo-1,3-dihydro-2H-isoindol-2-yl)-8-iodo-5-oxooctahydroindolizine-3-carboxylate	150 K	None	None	light colorless	None	None	None	None	N.D.Prasad Atmuri, W.D.Lubell
BUPCAS	CHIRAL	Enantiopure	NO	NO	P1	1	TRUE	FALSE	3.99	4	1	8	C	8	4	4	4	0	(4, SR)	1	4	chiral	C1	4	4	4	Wa-could be Diast	contains following chiral atom(s)C	NA	NA	10.2391	11.4922	24.9637	91.304	98.318	114.935	2624.13	1.45391	C27 H29 Br1 N1 O6 P1	(1-benzyl-5-bromo-3-hydroxy-2-oxo-2,3-dihydro-1H-indol-3-yl)(4-methylphenyl)methyl diethyl phosphate	93 K	None	None	colorless	None	None	None	None	M.A.Horwitz, N.Tanaka, T.Yokosaka, D.Uraguchi, J.S.Johnson, T.Ooi
BUQHED	CHIRAL	Enantiopure	NO	NO	P1	1	TRUE	FALSE	3.97	2	1	4	C	4	2	0	4	0	(2, SS)	1	2	chiral	C1	2	2	2	Wa-could be Diast	contains following chiral atom(s)C	NA	NA	6.9088	9.4007	12.2273	100.119	99.914	94.579	765.128	1.33832	C15 H20 N2 O5	3-methyl-N-3-methyl-8a-(methylperoxy)-5,8-dioxo-1,2,3,5,8,8a-hexahydroindolizin-6-ylbut-2-enamide	100 K	None	None	colorless	None	None	None	None	Ling Liu, Sainan Li, Runze Sun, Xiangjing Qin, Jianhua Ju, Changsheng Zhang, Yanwen Duan, Yong Huang
BUWQER	CHIRAL	Enantiopure + achiral molecule	NO	NO	P1	1	TRUE	FALSE	4.29	1	1	3	C	3	3	2	1	0	(1, RSR)	1	1	chiral	C1	3	1	1	W1_enantiopure AU	contains following chiral atom(s)C	NA	NA	4.8239	7.5476	9.6751	97.944	96.622	95.953	343.979	1.46885	C12 H13 F1 N2 O4,2(H2 O1)	1-(7-fluoroquinoxalin-2-yl)butane-1,2,3,4-tetrol dihydrate	293 K	None	None	colorless	None	None	None	None	A.Darehkordi, F.Rahmani, M.Ramezani, F.Askari, H.A.Rudbari, G.Bruno
BUWWUM	CHIRAL	Enantiopure	NO	NO	P1	1	TRUE	FALSE	4.58	1	1	4	C	4	4	0	4	0	(1, SSSS)	1	1	chiral	C1	1	1	1	W1_enantiopure AU	contains following chiral atom(s)C	NA	NA	5.9632	8.8669	10.0968	76.807	82.639	75.7607	502.342	1.23771	C20 H26 N2 O5	(S,S)-2-(((2-(((Benzyloxy)carbonyl)amino)cyclopentyl)carbonyl)amino)cyclopentanecarboxylic acid	at 190 K	None	417-419 K	colorless	None	None	None	None	E.Abraham, C.W.Bailey, T.D.W.Claridge, S.G.Davies, K.B.Ling, B.Odell, T.L.Rees, P.M.Roberts, A.J.Russell, A.D.Smith, L.J.Smith, H.R.Storr, M.J.Sweet, A.L.Thompson, J.E.Thomson, G.E.Tranter, D.J.Watkin
BUWYUQ	CHIRAL	Enantiopure	NO	NO	P1	1	TRUE	FALSE	3.18	1	1	3	C	3	3	2	1	0	(1, RSR)	1	1	chiral	C1	1	1	1	W1_enantiopure AU	contains following chiral atom(s)C	NA	NA	8.0643	9.5772	9.7272	71.192	74.716	76.923	677.738	1.34426	C33 H28 N2 O4 S1	2-(4-methylbenzene-1-sulfonyl)-4-(3-oxo-3-phenylpropyl)-11-phenyl-1,2,4,5-tetrahydro-3H-5,1-(azenometheno)-2-benzazepin-3-one	100.0 K	None	None	colorless	None	None	None	None	Jin-Tao Ma, Ying Cheng
BUYHEK	CHIRAL	Enantiopure + achiral molecule	NO	NO	P1	1	TRUE	FALSE	4.1	1	1	10	C	10	6	2	8	0	(1, SSSRSSSSRS)	1	1	chiral	C1	2	1	1	W1_enantiopure AU	contains following chiral atom(s)C	NA	NA	6.2827	7.1127	12.6469	91.304	91.32	115.381	510.133	1.25817	C21 H36 O5,H2 O1	Pregnane-3,12,14,17,20-pentol monohydrate	100 K	None	None	colorless	None	None	None	None	Yi Yang See, A.T.Herrmann, Y.Aihara, P.S.Baran
CABBIT	CHIRAL	Enantiopure	NO	NO	P1	1	TRUE	FALSE	2.87	2	1	8	C	8	6	0	8	0	(2, SSSS)	1	2	chiral	C1	2	2	2	Wa-could be Diast	contains following chiral atom(s)C	NA	NA	6.4026	6.7732	18.8933	98.068	90.628	117.557	716.494	1.24386	C17 H20 N2 O1	3-(benzylamino)-2-methyl-5-oxobicyclo2.2.2octane-2-carbonitrile	100 K	None	None	colorless	None	None	None	None	M.F.El-Mansy, Jun Yong Kang, Rajinikanth Lingampally, R.G.Carter
CABWOS	CHIRAL	Enantiopure	NO	NO	P1	1	TRUE	FALSE	3.8	1	1	10	C	10	7	6	4	0	(1, RSRSRRRSSR)	1	1	chiral	C1	1	1	1	W1_enantiopure AU	contains following chiral atom(s)C	NA	NA	8.957	9.667	9.827	110.1	92.42	110.39	736.215	1.2825	C28 H40 O12	10,13-Deacetyl abeo-baccatin IV	at 293 K	None	493-495 K	colorless	None	None	methanol	None	S.K.Chattopadhyay, A.Sharon, U.Yadav, S.Srivastava, V.K.Mehta, P.R.Maulik
CADQUT01	CHIRAL	Enantiopure + achiral molecule	NO	NO	P1	1	TRUE	FALSE	4.77	2	1	10	C	10	10	6	4	0	(2, RSRRS)	1	2	chiral	C1	4	2	2	Wa-could be Diast	contains following chiral atom(s)C	NA	NA	6.3327	11.4364	14.1044	73.787	88.273	88.333	980.19	1.47181	C21 H20 O9,H2 O1	7-hydroxy-3-(4-hydroxyphenyl)-8-3,4,5-trihydroxy-6-(hydroxymethyl)oxan-2-yl-4H-1-benzopyran-4-one monohydrate	173 K	None	None	None	None	None	None	None	PUEMH PANG
CADQUT03	CHIRAL	Enantiopure + achiral molecule	NO	NO	P1	1	TRUE	FALSE	3.35	2	1	10	C	10	10	6	4	0	(2, RSRRS)	1	2	chiral	C1	4	2	2	Wa-could be Diast	contains following chiral atom(s)C	NA	NA	6.3386	11.4449	14.092	73.69	88.434	88.136	980.462	1.4714	C21 H20 O9,H2 O1	7-hydroxy-3-(4-hydroxyphenyl)-8-3,4,5-trihydroxy-6-(hydroxymethyl)oxan-2-yl-4H-1-benzopyran-4-one monohydrate	193 K	None	None	None	None	None	None	None	Hui Chen, Zunting Pang, Qiyang Qiao, Yanming Xia, Yuanfeng Wei, Yuan Gao, Jianjun Zhang, Shuai Qian
CAFNAB	CHIRAL	Enantiopure	NO	NO	P1	1	TRUE	FALSE	2.65	2	1	2	C	2	0	2	0	0	(2, R)	1	2	chiral	C1	2	2	2	Wa-could be Diast	contains following chiral atom(s)C	NA	NA	7.6489	9.0467	11.6236	98.592	98.85	101.379	765.592	1.42817	C18 H17 Br1 O1	7-bromo-1-(2-vinylphenyl)-1,2,3,4-tetrahydronaphthalen-1-ol	293 K	None	None	colorless	None	None	None	None	Lei Li, Zhong-Liang Li, Fu-Li Wang, Zhen Guo, Yong-Feng Cheng, Na Wang, Xiao-Wu Dong, Chao Fang, Jingjiang Liu, Chunhui Hou, Bin Tan, Xin-Yuan Liu
CAHBOD	CHIRAL	Enantiopure	NO	NO	P1	1	TRUE	FALSE	2.7	1	1	5	C	5	5	4	1	0	(1, RRSRR)	1	1	chiral	C1	1	1	1	W1_enantiopure AU	contains following chiral atom(s)C	NA	NA	5.97	7.431	7.774	87.66	88.31	76.03	334.33	1.42222	C12 H18 N2 O4 S1	(6S)-6,5-anhydro-6-hydroxy-1-(2,3-O-isopropylidene-Î²-D-ribofuranosyl)-hexahydropyrimidine-2-thione	None	None	229.0-229.5 deg.C	None	None	None	ethanol	None	A.D.Shutalev, V.F.Zavodnik, G.V.Gurskaya
CAKHIF	CHIRAL	Enantiopure + achiral molecule	NO	NO	P1	1	TRUE	FALSE	3.3	2	1	10	C	10	10	8	2	0	(2, RRSRR)	1	2	chiral	C1	4	2	2	Wa-could be Diast	contains following chiral atom(s)C	NA	NA	5.09	7.868	20.263	91.82	89.99	92.07	810.556	1.40268	C15 H20 N2 O6,H2 O1	N-(2-Acetamido-2-deoxy-Î²-D-glucopyranosyl)benzamide monohydrate	None	None	decomposes at 465 K	colorless	None	None	None	The authors have provided cell angles not published in the paper	D.Sriram, T.Lakshmanan, D.Loganathan, S.Srinivasan
CAKQUC	CHIRAL	Enantiopure	NO	NO	P1	1	TRUE	FALSE	4.62	2	1	8	C	8	8	4	4	0	(2, RSRS)	1	2	chiral	C1	2	2	2	Wa-could be Diast	contains following chiral atom(s)C	NA	NA	8.1078	8.6406	23.281	79.748	82.991	63.334	1432.59	1.32365	C28 H27 Cl1 N2 O9	3,4,5-Triacetoxytetrahydro-2H-pyran-2-yl 1-benzyl-3-(4-chlorophenyl)-1H-pyrazole-5-carboxylate	at 273 K	None	None	colorless	None	None	None	None	Song Lian, Jin-Ting Liu, Liang-Wen Zheng, Wei-Yong Liu, Bao-Xiang Zhao
CAKSOZ	CHIRAL	Enantiopure	NO	NO	P1	1	TRUE	FALSE	4.55	2	1	10	C	10	10	2	8	0	(2, SSSSR)	1	2	chiral	C1	2	2	2	Wa-could be Diast	contains following chiral atom(s)C	NA	NA	6.2197	11.0735	11.6222	102.71	91.8312	101.753	762.005	1.30882	C14 H20 O7	8-t-butyl-3-oxo-2,7-dioxabicyclo3.2.1octane-4,6-diyl diacetate	153 K	None	None	colorless	None	None	None	None	M.J.Schnermann, C.M.Beaudry, A.V.Egorova, R.S.Polishchuk, C.Sutterlin, L.E.Overman
CAMCBX10	CHIRAL	Enantiopure	NO	NO	P1	1	TRUE	FALSE	4.8	2	1	4	C	4	4	2	2	0	(2, SR)	1	2	chiral	C1	2	2	2	Wa-could be Diast	contains following chiral atom(s)C	NA	NA	7.429	12.02	6.081	98.06	104.86	88.63	519.626	1.15198	C11 H16 O2	(-)-Camphene-8-carboxylic acid	None	None	None	None	None	None	None	None	P.C.Moews, J.R.Knox, W.R.Vaughan
CANBEB	CHIRAL	Enantiopure	NO	NO	P1	1	TRUE	FALSE	4.52	2	1	4	C	4	2	4	0	0	(2, RR)	1	2	chiral	C1	2	2	2	Wa-could be Diast	contains following chiral atom(s)C	NA	NA	9.88	10.263	12.4	91.32	103.286	117.829	1069.68	1.3656	C23 H18 Cl1 N1 O6	4-(4-chlorophenyl)-1-(2-oxo-1,3-oxazolidin-3-yl)-2-(5-oxo-2-phenyl-2,5-dihydrofuran-2-yl)butane-1,4-dione	296 K	None	None	None	None	None	None	None	Zhiyong Jiang
CANQUD	CHIRAL	Enantiopure	NO	NO	P1	1	TRUE	FALSE	3.69	2	1	4	C	4	4	2	2	0	(2, RS)	1	2	chiral	C1	2	2	2	Wa-could be Diast	contains following chiral atom(s)C	NA	NA	9.095	9.9375	10.043	109.82	114.67	94.94	747.976	1.38682	C13 H16 N2 O5 S1	(2R,4S)-4-Benzyl-2-(1-(methoxycarbonyl)ethyl)-3-oxo-1,2,5-thiadiazolidine 1,1-dioxide	None	None	376-378 K	None	None	None	None	None	S.Boudjabi, G.Dewynter, N.Voyer, L.Toupet, J.-L.Montero
CANXIA	ACHIRAL	+ achiral molecule	NO	NO	P1	1	TRUE	FALSE	3.04	0	0	0	No Chiral atom	0	0	0	0	0						1	1	1	NA	contains following chiral atom(s)No Chiral atom	NA	NA	6.324	6.454	7.062	111.55	95.505	113.395	235.972	1.69006	C6 H12 N2 O8	2,3-bis(hydroxymethyl)-2,3-dinitrobutane-1,4-diol	at 296 K	None	424 K	colorless	None	None	None	None	Fu-Qiang Bi, Bo-Zhou Wang, Xue-Zhong Fan, Cheng Xu, Zhong-Xue Ge, Qing Liu, Guo-Fang Zhang
CANXUN	CHIRAL	Enantiopure + achiral molecule	NO	NO	P1	1	TRUE	FALSE	4.11	2	1	20	C	20	20	12	8	0	(2, SSRRRSRRSR)	1	2	chiral	C1	4	2	2	Wa-could be Diast	contains following chiral atom(s)C	NA	NA	9.0944	9.6233	20.7019	97.143	91.834	115.608	1613.68	1.60028	C31 H29 Br1 O14,0.5(C3 H6 O1),0.5(C5 H10 O1)	1-bromo-10-((3-((3,5-dihydroxy-4-methoxy-6-methyloxan-2-yl)oxy)-4,5-dihydroxy-6-methyloxan-2-yl)oxy)-6-hydroxybenzog2benzopyrano5,4,3-cde2benzopyran-5,12-dione acetone pentan-3-one solvate	133 K	None	None	colorless	None	None	None	None	N.Ueberschaar, Zhongli Xu, K.Scherlach, M.Metsa-Ketela, T.Bretschneider, H.-M.Dahse, H.Gorls, C.Hertweck
CAQZAW	ACHIRAL	+ achiral molecule	NO	NO	P1	1	TRUE	FALSE	4.23	0	0	0	No Chiral atom	0	0	0	0	0						5	2	2	NA	contains following chiral atom(s)No Chiral atom	NA	NA	10.403	12.451	16.425	102.74	95.43	110.12	1914.42	1.2523	C39 H32 B1 N1 O2,C6 H7 B1 O2,0.5(C1 H2 Cl2)	(2,6-bis(2,2-Diphenyl-2-oxyethyl)pyridyl)phenylboron phenylboronic acid dichloromethane solvate	at 293 K	None	464-466 K	colorless	None	None	None	None	G.Vargas, N.Farfan, R.Santillan, A.Gutierrez, E.Gomez, V.Barba
CASDOT	CHIRAL	Enantiopure + achiral molecule	NO	NO	P1	1	TRUE	FALSE	3.46	2	1	2	C	2	2	0	2	0	(2, S)	1	2	chiral	C1	4	2	2	Wa-could be Diast	contains following chiral atom(s)C	NA	NA	8.2799	10.6794	12.3044	102.734	105.459	104.198	967.89	1.39464	C12 H14 N2 O6 S1,C7 H8	ethyl 3-(2,2-dioxo-3,4-dihydro-2H-1,2Î»6,3-benzoxathiazin-4-yl)-2-(hydroxyimino)propanoate toluene solvate	93.2 K	None	None	colorless	None	None	None	None	S.Mondal, R.D.Aher, V.Bethi, Yu-Ju Lin, T.Taniguchi, K.Monde, F.Tanaka
CATTEZ	CHIRAL	Enantiopure	NO	NO	P1	1	TRUE	FALSE	4.22	2	1	8	C	8	8	0	8	0	(2, SSSS)	1	2	chiral	C1	2	2	2	Wa-could be Diast	contains following chiral atom(s)C	NA	NA	7.9449	8.9886	11.8159	107.74	101.952	103.735	744.25	2.19474	C12 H12 Br4 O1	2,3,4,5-tetrabromo-1-phenylhexan-1-one	293 K	None	None	colorless	None	None	None	None	Yu Tan, Shilong Luo, Dongmei Li, Nan Zhang, Shiqi Jia, Yidong Liu, Wenling Qin, Choong Eui Song, Hailong Yan
CAXBAF	CHIRAL	Enantiopure + achiral molecule	NO	NO	P1	1	TRUE	FALSE	4.95	2	1	6	C	6	6	2	4	0	(2, SRS)	1	2	chiral	C1	4	2	2	Wa-could be Diast	contains following chiral atom(s)C	NA	NA	11.738	12.959	13.19	89.999	90.062	110.351	1881.13	1.34753	C35 H32 N8 O7 S1,C1 H3 Na1 O1	Mechercharmycin A methoxy-sodium	at 298 K	None	506 K	colorless	None	None	dichloromethane/methanol	None	K.Kanoh, Y.Matsuo, K.Adachi, H.Imagawa, M.Nishizawa, Y.Shizuri
CAZLAR02	ACHIRAL	+ achiral molecule	NO	NO	P1	1	TRUE	FALSE	3.62	0	0	0	No Chiral atom	0	0	0	0	0						4	2	2	NA	contains following chiral atom(s)No Chiral atom	NA	NA	8.3081	8.6676	11.4388	94.243	98.28	92.287	811.835	2.56918	C6 H4 S4,C6 Br4 O2	1,1,3,3-Tetrathiafulvalene 2,3,5,6-tetrabromo-p-benzoquinone	at 20 K	None	None	black	low temperature polymorph	phase transition from paramagnetic to nonmagnetic state at 53K	acetonitrile	None	P.Garcia, S.Dahaoui, P.Fertey, E.Wenger, C.Lecomte
CAZWIK	CHIRAL	Enantiopure	NO	NO	P1	1	TRUE	FALSE	3.31	1	1	3	C	3	3	2	1	0	(1, RRS)	1	1	chiral	C1	1	1	1	W1_enantiopure AU	contains following chiral atom(s)C	NA	NA	5.438	8.35	12.549	105.26	97.29	103.97	522.313	1.343	C22 H22 N4 O5	1-(2-Deoxy-3,5-bis-O-(4-methylbenzoyl)pentafuranosyl)-1H-tetrazole	at 150 K	None	None	colorless	None	None	None	None	J.Muller, D.Bohme, P.Lax, M.M.Cerda, M.Roitzsch
CEBZAM	ACHIRAL	+ achiral molecule	NO	NO	P1	1	TRUE	FALSE	3.28	0	0	0	No Chiral atom	0	0	0	0	0						2	2	2	NA	contains following chiral atom(s)No Chiral atom	NA	NA	6.1293	7.0668	14.8599	81.692	79.357	66.033	576.304	1.79269	C12 H7 Br1 O5	Methyl (6-bromo-2-oxo-2H-chromen-3-yl)(oxo)acetate	at 273 K	None	433-434 K	green	None	None	None	None	G.Maiti, R.Karmakar, U.Kayal, R.N.Bhattacharya
CECYIU	CHIRAL	Enantiopure	NO	NO	P1	1	TRUE	FALSE	2.87	2	1	6	C	6	6	4	2	0	(2, RSR)	1	2	chiral	C1	2	2	2	Wa-could be Diast	contains following chiral atom(s)C	NA	NA	7.8754	8.1504	10.0893	108.637	96.327	104.562	580.975	1.43617	C11 H13 N3 O4	4-Amino-5-ethynyl-1-(4-hydroxy-5-(hydroxymethyl)tetrahydrofuran-2-yl)pyrimidin-2(1H)-one	at 130 K	None	None	colorless	None	None	None	None	F.Seela, H.Mei, H.Xiong, S.Budow, H.Eickmeier, H.Reuter
CEFGOJ	CHIRAL	Enantiopure + achiral molecule	NO	NO	P1	1	TRUE	FALSE	4.6	1	1	2	C	2	2	0	2	0	(1, SS)	1	1	chiral	C1	2	1	1	W1_enantiopure AU	contains following chiral atom(s)C	NA	NA	5.801	7.977	9.11	102.33	97.92	109.82	377.172	1.44545	C14 H18 N2 O6,H2 O1	L-Tyrosyl-L-glutamic acid monohydrate	None	None	None	None	None	None	None	The O6-H(O6) bond is 1.33, but H(O6) then is only 1.29 away from Ow. H(O6) has been removed.	J.Pandit, T.P.Seshadri, M.A.Viswamitra
CEFGOJ01	CHIRAL	Enantiopure + achiral molecule	NO	NO	P1	1	TRUE	FALSE	3.84	1	1	2	C	2	2	0	2	0	(1, SS)	1	1	chiral	C1	2	1	1	W1_enantiopure AU	contains following chiral atom(s)C	NA	NA	5.806	7.981	9.114	102.36	97.85	109.86	377.795	1.44306	C14 H18 N2 O6,H2 O1	L-tyrosyl-L-glutamic acid monohydrate	298 K	None	None	colorless	None	None	water	None	I.Fujisawa, S.Itsuno
CEFKAA	CHIRAL	Enantiopure	NO	NO	P1	1	TRUE	FALSE	4.52	2	1	8	C	8	8	8	0	0	(2, RRRR)	1	2	chiral	C1	2	2	2	Wa-could be Diast	contains following chiral atom(s)C	NA	NA	7.8366	11.2356	13.1147	73.142	89.734	75.326	1066.11	1.15433	C19 H34 O5 Si1	t-Butyl((2,2-dimethyl-1,3-dioxolan-4-yl)(5-ethynyl-2,2-dimethyl-1,3-dioxolan-4-yl)methoxy)dimethylsilane	at 100 K	None	None	colorless	None	None	diethyl ether	None	A.Furstner, M.Wuchrer
CEFNUA	CHIRAL	Enantiopure + achiral molecule	NO	NO	P1	1	TRUE	FALSE	3.33	2	1	8	C	8	8	4	4	0	(2, SRSR)	1	2	chiral	C1	3	2	2	Wa-could be Diast	contains following chiral atom(s)C	NA	NA	6.32	9.739	11.787	114.044	100.295	94.954	641.57	1.45085	C11 H17 N3 O5,0.5(H2 O1)	4-amino-5-(1-hydroxyethyl)-1-4-hydroxy-5-(hydroxymethyl)oxolan-2-ylpyrimidin-2(1H)-one hemihydrate	180 K	None	None	colorless	None	None	None	None	F.Gracias, O.Ruiz-Larrabeiti, V.V.Hausnerova, R.Pohl, B.Klepetarova, V.Sykorova, L.Krasny, M.Hocek
CEFPAI	CHIRAL	Enantiopure	NO	NO	P1	1	TRUE	FALSE	2.56	2	1	8	C	8	8	4	4	0	(2, SRSR)	1	2	chiral	C1	2	2	2	Wa-could be Diast	contains following chiral atom(s)C	NA	NA	7.6129	9.1399	11.2377	91.092	103.921	112.07	698.124	1.35719	C12 H19 N3 O5	4-amino-1-4-hydroxy-5-(hydroxymethyl)oxolan-2-yl-5-(1-hydroxypropyl)pyrimidin-2(1H)-one	180 K	None	None	colorless	None	None	None	None	F.Gracias, O.Ruiz-Larrabeiti, V.V.Hausnerova, R.Pohl, B.Klepetarova, V.Sykorova, L.Krasny, M.Hocek
CEFSAJ	CHIRAL	Enantiopure	NO	NO	P1	1	TRUE	FALSE	4.28	1	1	3	C	3	3	1	2	0	(1, SRS)	1	1	chiral	C1	1	1	1	W1_enantiopure AU	contains following chiral atom(s)C	NA	NA	5.8542	9.0365	11.352	108.59	93.94	101.23	552.753	1.21826	C26 H31 N1 O3	Benzyl 2-benzyl-4-(3aS,7aR)-2,3,3a,4,5,6,7,7a-octahydro-1H-isoindol-2-yl-4-oxobutanoate	at 294 K	None	None	colorless	None	None	None	None	Zhenhua Shang, Longpeng Xu, Ligang Zheng, Yong Zhang
CEGLCA	CHIRAL	Enantiopure	NO	NO	P1	1	TRUE	FALSE	4.5	1	1	4	C	4	4	3	1	0	(1, RRSR)	1	1	chiral	C1	1	1	1	W1_enantiopure AU	contains following chiral atom(s)C	NA	NA	4.807	5.093	11.888	91.25	84.48	94.48	288.778	1.48165	C8 H16 Cl1 N1 O6	N-(2-Chloroethyl)-D-gluconamide	None	None	None	None	None	None	None	Reported signs of all coordinates have been reversed to give correct configuration.	L.O.G.Satzke, M.F.Mackay
CEGLCA01	CHIRAL	Enantiopure	NO	NO	P1	1	TRUE	FALSE	5	1	1	4	C	4	4	1	3	0	(1, SSRS)	1	1	chiral	C1	1	1	1	W1_enantiopure AU	contains following chiral atom(s)C	NA	NA	4.807	5.093	11.888	91.25	84.48	94.48	288.778	1.48165	C8 H16 Cl1 N1 O6	N-(2-Chloroethyl)-D-gluconamide	None	None	None	None	None	None	None	X-COORD OF H9 GIVEN AS -.0193 SHOULD BE POSITIVE	A.C.Sindt, M.F.Mackay
CEGPIN	CHIRAL	Enantiopure	NO	NO	P1	1	TRUE	FALSE	3.9	2	1	6	C	6	2	2	4	0	(2, RSS)	1	2	chiral	C1	2	2	2	Wa-could be Diast	contains following chiral atom(s)C	NA	NA	10.167	14.115	7.428	104.61	101.42	103.82	963.07	1.58066	C22 H18 O11	4,4a,11,12a-Tetrahydroxy-2-(1-hydroxyethylidene)-6-methyl-8-methoxy-1,2,3,4,4a,5,7,10,12,12a-decahydro-naphthacen-1,3,7,10,12-pentaone	None	None	None	red	None	None	chloroform/methanol	None	I.Momose, Wei Chen, H.Nakamura, H.Naganawa, H.Iinuma, T.Takeuchi
CEGRAK	CHIRAL	Enantiopure	NO	NO	P1	1	TRUE	FALSE	2.9	1	1	4	C	4	4	1	3	0	(1, SRSS)	1	1	chiral	C1	1	1	1	W1_enantiopure AU	contains following chiral atom(s)C	NA	NA	6.5453	7.9599	12.7396	87.39	76.265	76.28	626.314	1.22904	C28 H33 N1 O5	t-butyl (4-methoxyphenyl)7-methyl-3-oxo-4-(2-phenylethyl)-8-oxabicyclo3.2.1oct-6-en-2-ylcarbamate	150 K	None	None	colorless	None	None	None	None	L.Villar, Uxue Uria, J.I.Martinez, L.Prieto, E.Reyes, L.Carrillo, J.L.Vicario
CEGZOF	ACHIRAL	+ achiral molecule	NO	NO	P1	1	TRUE	FALSE	3.4	0	0	0	No Chiral atom	0	0	0	0	0						1	1	1	NA	contains following chiral atom(s)No Chiral atom	NA	NA	4.0656	7.7855	12.242	96.263	91.38	97.228	381.838	1.46035	C16 H14 Cl1 N1 O3 S1	5-Chloro-2-(3,4,5-trimethoxyphenyl)-1,3-benzothiazole	at 273 K	None	None	colorless	None	None	ethanol	None	S.Yousuf, S.Shah, N.Ambreen, K.M.Khan, S.Ahmad
CEHDAX	CHIRAL	Enantiopure	NO	NO	P1	1	TRUE	FALSE	4.57	2	1	8	C	8	8	4	4	0	(2, RSSR)	1	2	chiral	C1	2	2	2	Wa-could be Diast	contains following chiral atom(s)C	NA	NA	5.3259	10.0118	14.4967	79.925	83.614	87.096	755.964	1.17001	C13 H24 F2 O3	3,9-difluoro-4,8-dihydroxy-2,10-dimethylundecan-6-one	293 K	None	None	colorless	None	None	None	None	A.Quintard, J.Rodriguez
CEHVEQ	CHIRAL	Enantiopure	NO	NO	P1	1	TRUE	FALSE	3.9	1	1	2	C	2	2	2	0	0	(1, RR)	1	1	chiral	C1	1	1	1	W1_enantiopure AU	contains following chiral atom(s)C	NA	NA	10.036	9.476	7.293	109.52	101.68	102.07	610.72	1.45582	C28 H27 Br1 N2 O4	5,6-Benzo-12-p-bromobenzoatomethyl-15-ethylidene-7-methyl-1,7-diazatricyclo(9.2.2.04,8)pentadec-4(8)-ene-9,13-dione	None	None	None	None	None	None	None	None	G.Massiot, C.Lavaud, J.Vercauteren, L.Le Men-Olivier, J.Levy, J.Guilhem, C.Pascard
CEHYEW	RACEMATE	Strict definition of kryptoracemate	KRYPTORACEMIC	NO	P1	1	TRUE	FALSE	4.53	4	1	4	C	4	4	2	2	0	(2, R), (2, S)	2	4	racemic	C1	4	4	4	RAC-2	contains following chiral atom(s)C	NA	NA	10.118	10.99	18.549	88.854	81.932	88.667	2041.33	1.31632	C24 H20 O2 S2	3-benzyl-5-(benzylsulfanyl)-6-phenyl-1,4-oxathiin-2(3H)-one	173.2 K	None	None	colorless	None	None	None	None	Tong Wang, Zhong-hua Gao, Song Ye
CEJHIM	CHIRAL	Enantiopure	NO	NO	P1	1	TRUE	FALSE	4.76	2	1	16	C	16	12	6	10	0	(2, SRSSSSRR)	1	2	chiral	C1	2	2	2	Wa-could be Diast	contains following chiral atom(s)C	NA	NA	8.3171	10.4531	16.3414	84.815	83.036	67.74	1303.6	1.31343	C26 H33 N3 O8	8a-azido-8-ethynyl-6-methoxy-5-(4-methoxyphenyl)methoxy-2,2,2,2-tetramethylhexahydro-2H,5H-spiro1,3dioxolane-4,4-furo3,4-e1,3benzodioxole	198 K	None	None	None	None	None	None	None	XIANGBING qi
CEKXIZ	CHIRAL	Enantiopure + achiral molecule	NO	NO	P1	1	TRUE	FALSE	3.6	1	1	5	C	5	4	4	1	0	(1, SRRRR)	1	1	chiral	C1	2	1	1	W1_enantiopure AU	contains following chiral atom(s)C	NA	NA	5.67	8.02	9.943	91.25	103.03	106.81	419.838	1.29482	C16 H23 N1 O5,H2 O1	Crispatine monohydrate	None	None	None	None	None	None	None	In published Bond Table C9 - C10 should be C9 - O10	M.F.Mackay, M.Sadek, C.C.J.Culvenor
CEMSIA	CHIRAL	Enantiopure	NO	NO	P1	1	TRUE	FALSE	4.92	1	1	1	C	1	0	0	1	0	(1, S)	1	1	chiral	C1	1	1	1	W2_enantiopure AU	contains following chiral atom(s)C	NA	NA	7.7986	9.4793	9.8417	104.543	94.77	104.513	673.432	1.26638	C34 H27 N1 O4	14-(3,5-dimethoxyphenyl)-8-methoxy-8-phenyl-8H-naphtho1,2:5,61,3oxazino3,4-aindole	293 K	None	None	colorless	None	None	None	None	Yuhong Tian, Fengdi Wu, Shiqi Jia, Xiangnan Gong, Hui Mao, Pengfei Wang, Wenling Qin, Hailong Yan
CEMVAS	ACHIRAL	+ achiral molecule	NO	NO	P1	1	TRUE	FALSE	4.35	0	0	0	No Chiral atom	0	0	0	0	0						1	1	1	NA	contains following chiral atom(s)No Chiral atom	NA	NA	6.0773	7.3465	9.7829	102.253	91.961	109.728	399.105	1.46626	C18 H16 N4 O2 S1	N,N-bis(3-pyridylmethyl)thiophene-2,5-dicarboxamide	at 150 K	None	None	colorless	None	None	dichloromethane/ methanol/ tetrahydrofuran	None	N.L.S.Yue, M.C.Jennings, R.J.Puddephatt
CEMZAX	CHIRAL	Enantiopure	NO	NO	P1	1	TRUE	FALSE	4.47	2	1	12	C	12	12	6	6	0	(2, SSRSRR)	1	2	chiral	C1	2	2	2	Wa-could be Diast	contains following chiral atom(s)C	NA	NA	10.54	13.2962	13.7619	71.577	89.697	69.957	1707.44	1.33982	C38 H44 N2 O8 S1	Methyl 11,17-dimethoxy-18-((4-methoxybenzyl)oxy)-1-((4-methylphenyl)sulfonyl)yohimban-16-carboxylate	at 15 K	None	None	pale yellow	None	None	None	None	N.S.Rajapaksa, M.A.McGowan, M.Rienzo, E.N.Jacobsen
CEMZUQ	CHIRAL	Enantiopure	NO	NO	P1	1	TRUE	FALSE	3.69	2	1	6	C	6	6	4	2	0	(2, SRR)	1	2	chiral	C1	2	2	2	Wa-could be Diast	contains following chiral atom(s)C	NA	NA	8.8735	9.7635	11.248	89.749	79.982	64.9723	866.903	1.14701	C16 H29 N1 O4	(4R,2R,3S)-3-(2,4-dimethyl-3-hydroxypentanoyl)-4-isopropyl-6,6-dimethyl1,3oxazinan-2-one	at 190 K	None	85-86deg.C	colorless	None	None	None	None	S.G.Davies, A.C.Garner, P.M.Roberts, A.D.Smith, M.J.Sweet, J.E.Thomson
CENBIH	CHIRAL	Enantiopure	NO	NO	P1	1	TRUE	FALSE	3.12	2	1	10	C	10	10	6	4	0	(2, SSRRR)	1	2	chiral	C1	2	2	2	Wa-could be Diast	contains following chiral atom(s)C	NA	NA	9.499	10.601	11.958	113.345	98.08	103.188	1039.87	1.37124	C18 H21 F6 N1 O4	N-(6-ethoxy-3-hydroxy-2-(trifluoromethyl)-tetrahydro-2H-pyran-4-yl)-2,2,2-trifluoro-N-(1-phenylethyl)acetamide	at 153 K	None	417 K	colorless	None	None	None	None	C.M.Hayman, D.S.Larsen, J.Simpson, K.B.Bailey, G.S.Gill
CENZIH	CHIRAL	Enantiopure	NO	NO	P1	1	TRUE	FALSE	3.57	1	1	4	C	4	2	2	2	0	(1, RSSR)	1	1	chiral	C1	1	1	1	W1_enantiopure AU	contains following chiral atom(s)C	NA	NA	6.935	11.421	13.29	65.671	78.203	88.644	936.725	1.21392	C40 H50 N2 O4 P2	6,7-bis((bis(2-methylphenyl)phosphanyl)methyl)-2,3-dimethoxy-2,3-dimethyloctahydro1,4dioxino2,3-dpyridazine	120 K	None	None	white	None	None	None	None	E.D.(.Knobloch), R.Bruckner
CEPKOY	ACHIRAL	+ achiral molecule	NO	NO	P1	1	TRUE	FALSE	3.8	0	0	0	No Chiral atom	0	0	0	0	0						2	2	2	NA	contains following chiral atom(s)No Chiral atom	NA	NA	4.8871	7.9597	21.788	81.771	89.918	72.223	797.968	1.35822	C22 H14 O3	Î²-Naphthoflavone 4-propargyl ether	at 298 K	None	None	yellow	None	None	methanol/acetone	None	Naijue Zhu, D.Lightsey, M.Foroozesh, W.Alworth, A.Chaudhary, K.L.Willett, C.L.K.Stevens
CETROI	CHIRAL	Enantiopure	NO	NO	P1	1	TRUE	FALSE	3.5	1	1	7	C	7	7	3	4	0	(1, SRSSRSR)	1	1	chiral	C1	1	1	1	W1_enantiopure AU	contains following chiral atom(s)C	NA	NA	5.349	6.664	9.266	85.91	76.35	70.83	303.16	1.43122	C10 H15 N1 O5 S1	(1S,2S)-1,2-S,O-(1-Cyano-2-methyl-1,2-ethanediyl)-1-thio-Î²-D-glucopyranose	at 90 K	None	468-470 K	None	None	None	None	None	L.Norskov-Lauritsen, F.S.Jorgensen, J.W.Jaroszewski
CETROI01	CHIRAL	Enantiopure	NO	NO	P1	1	TRUE	FALSE	3.1	1	1	7	C	7	7	3	4	0	(1, SRSSRSR)	1	1	chiral	C1	1	1	1	W1_enantiopure AU	contains following chiral atom(s)C	NA	NA	6.6991	9.347	5.328	103.56	109.14	86.71	306.324	1.41644	C10 H15 N1 O5 S1	1,2-S,O-(1R,2S-1-Cyano-2-methyl-1,2-ethanediyl)-1-thio-Î²-D-glucopyranose	None	None	465-467 K	None	None	None	None	None	J.F.Richardson, M.H.Benn
CETWAC	CHIRAL	Enantiopure	NO	NO	P1	1	TRUE	FALSE	4.95	2	1	2	C	2	2	2	0	0	(2, R)	1	2	chiral	C1	2	2	2	Wa-could be Diast	contains following chiral atom(s)C	NA	NA	6.8876	9.3397	13.2738	88.577	88.192	75.637	826.65	1.48568	C19 H16 Cl1 N3 O3	(R)-2-(4-chlorobenzene-1-carbonyl)-1,3,4,12a-tetrahydropyrazino2,1-c1,4benzodiazepine-6,12(2H,11H)-dione	100 K	None	None	colorless	None	None	None	None	A.Mieczkowski, M.Psurski, M.Baginski, B.Bieszczad, M.Mroczkowska, M.Wilczek, J.Czajkowska, D.Trzybinski, K.Wozniak, J.Wietrzyk
CEVYEH01	CHIRAL	Enantiopure + achiral molecule	NO	NO	P1	1	TRUE	FALSE	1.9	1	1	10	C P	8	8	7	3	0	(1, RRSRRRRSSR)	1	1	chiral	C1	5	1	1	W1_enantiopure AU	contains following chiral atom(s)C,P	NA	NA	8.592	8.845	11.192	109.64	90.56	103.92	773.712	1.5785	C21 H27 N7 O14 P2,4(H2 O1)	(1-(3-Carbamoylpyridinio)-Î²-D-ribofuranos-5-yl)-(adenosin-5-yl)-pyrophosphate tetrahydrate	at 100 K	None	None	colorless	None	None	None	None	B.Guillot, C.Jelsch, C.Lecomte
CEVYEH11	CHIRAL	Enantiopure + achiral molecule	NO	NO	P1	1	TRUE	FALSE	1.23	1	1	10	C P	8	8	7	3	0	(1, RRSRRRRSSR)	1	1	chiral	C1	5	1	1	W1_enantiopure AU	contains following chiral atom(s)C,P	NA	NA	8.592	8.845	11.192	109.64	90.56	103.92	773.712	1.5785	C21 H27 N7 O14 P2,4(H2 O1)	(1-(3-Carbamoylpyridinio)-Î²-D-ribofuranos-5-yl)-(adenosin-5-yl)-pyrophosphate tetrahydrate	at 100 K	None	None	colorless	None	None	None	Cif has cell temperature 293 K, main diffraction temperature 100 K	B.Guillot, N.Muzet, E.Artacho, C.Lecomte, C.Jelsch
CEWDUG	CHIRAL	Enantiopure	NO	NO	P1	1	TRUE	FALSE	4.65	2	1	18	C	18	14	12	6	0	(2, RSRRSRRRS)	1	2	chiral	C1	2	2	2	Wa-could be Diast	contains following chiral atom(s)C	NA	NA	8.3874	10.6644	13.5952	69.268	89.374	71.779	1073.44	1.28557	C24 H33 N1 O5	methyl 7-(acetyloxy)-5-hydroxy-15-methyl-2,3,3a,4,5,7,7a,8,9,10,11,11a-dodecahydro-2,5,1-(butane1,1,4triyl)benzo6,7indeno7a,1-bpyrrole-6-carboxylate	150 K	None	385.15-387.15 K	pale yellow	None	None	Methanol	None	Ping Lan, A.J.Herlt, A.C.Willis, W.C.Taylor, L.N.Mander
CEWHAR	CHIRAL	Enantiopure	NO	NO	P1	1	TRUE	FALSE	4.31	3	1	3	C	3	3	0	3	0	(3, S)	1	3	chiral	C1	3	3	3	Wa-could be Diast	contains following chiral atom(s)C	NA	NA	4.8394	16.3629	17.2064	63.621	89.08	88.61	1220.26	1.28745	C17 H21 N3 O3	benzyl 2-(1-acetamidoethyl)-1,5-dimethyl-1H-imidazole-4-carboxylate	100 K	None	None	colorless	None	None	None	None	Adam, Abdulselam, Wolper, Christoph, Haberhauer, Gebhard
CEWMAT	CHIRAL	Enantiopure	NO	NO	P1	1	TRUE	FALSE	4.36	2	1	6	C	6	6	2	4	0	(2, SSR)	1	2	chiral	C1	2	2	2	Wa-could be Diast	contains following chiral atom(s)C	NA	NA	5.679	11.5567	12.778	69.216	89.592	78.718	767.125	1.13149	C16 H23 N1 O2	(1R,3S,5S)-(-)-3-Ethyl-1-(2-hydroxy-1-phenylethyl)-5-methylpiperidin-2-one	at 296 K	None	365 K	colorless	None	None	chloroform/cyclohexane	None	A.Castro, J.Juarez, D.Gnecco, J.L.Teran, L.Orea, S.Bernes
CEXFOC	ACHIRAL	+ achiral molecule	NO	NO	P1	1	TRUE	FALSE	4.54	0	0	0	No Chiral atom	0	0	0	0	0						2	2	2	NA	contains following chiral atom(s)No Chiral atom	NA	NA	10.078	10.294	15.787	73.466	73.382	82.855	1502.84	1.39555	C37 H27 Br1 O5	(S)-3-Bromo-2-(methoxymethyl)-6-methylbiphenyl-2,6-diyl bis(2-naphthoate)	123 K	None	450-451 K	colorless	None	None	benzene/ethanol/methanol	None	K.Mori, Y.Ichikawa, M.Kobayashi, Y.Shibata, M.Yamanaka, T.Akiyama
CHOEST22	CHIRAL	Enantiopure	NO	NO	P1	1	TRUE	FALSE	4.58	8	1	64	C	64	48	32	32	0	(8, RRSSSRSR)	1	8	chiral	C1	8	8	8	Wa-could be Diast	contains following chiral atom(s)C	NA	NA	10.278	14.0688	33.99	96.047	94.543	90.441	4871.58	1.05436	C27 H46 O1	cholest-5-en-3-ol	100 K	None	None	light colorless	None	None	high throughput micro crystallisation	None	A.R.Tyler, R.Ragbirsingh, C.J.McMonagle, P.G.Waddell, S.E.Heaps, J.W.Steed, Paul Thaw, M.J.Hall, M.R.Probert
CICWIY	CHIRAL	Enantiopure	NO	NO	P1	1	TRUE	FALSE	4.21	2	1	8	C	8	6	6	2	0	(2, RRRS)	1	2	chiral	C1	2	2	2	Wa-could be Diast	contains following chiral atom(s)C	NA	NA	5.6599	8.6557	16.7605	84.116	82.123	87.371	808.649	1.23369	C19 H24 O3	7-methoxy-2-methyl-3,4,4a,9,10,10a-hexahydro-2H-spirooxolane-2,1-phenanthren-5-one	183 K	None	None	colorless	None	None	None	None	B.Schonecker, Corina Lange, Gorls, Helmar
CICXIZ	CHIRAL	Enantiopure	NO	NO	P1	1	TRUE	FALSE	3.75	1	1	4	C	4	3	3	1	0	(1, RRRS)	1	1	chiral	C1	1	1	1	W1_enantiopure AU	contains following chiral atom(s)C	NA	NA	6.2739	7.773	11.582	90.614	92.731	107.23	538.677	1.19773	C26 H32 N2 O1	3-methoxy-N-2-(pyridin-2-yl)ethylestra-1,3,5(10)-trien-17-imine	183 K	None	None	colorless	None	None	None	None	B.Schonecker, M.Rost, Gorls, Helmar
CICYAS	CHIRAL	Enantiopure	NO	NO	P1	1	TRUE	FALSE	4.5	1	1	5	C	5	4	1	4	0	(1, SSSSR)	1	1	chiral	C1	1	1	1	W1_enantiopure AU	contains following chiral atom(s)C	NA	NA	6.3757	7.753	11.58	88.795	87.021	73.592	548.343	1.18273	C26 H34 N2 O1	3-methoxy-N-2-(pyridin-2-yl)ethylestra-1,3,5(10)-trien-17-amine	183 K	None	None	colorless	None	None	None	None	B.Schonecker, M.Rost, Gorls, Helmar
CIDHAB	ACHIRAL	+ achiral molecule	NO	NO	P1	1	TRUE	FALSE	4.82	0	0	0	No Chiral atom	0	0	0	0	0						12	12	12	NA	contains following chiral atom(s)No Chiral atom	NA	NA	9.5552	14.2099	22.3524	76.511	79.955	81.714	2889.01	1.54914	C9 H5 Cl1 N2 O3	4-(4-chlorophenyl)-3-nitro-1,2-oxazole	293 K	None	None	colorless	None	None	None	None	meiqiang fu
CIDPAJ	ACHIRAL	+ achiral molecule	NO	NO	P1	1	TRUE	FALSE	1.87	0	0	0	No Chiral atom	0	0	0	0	0						1	1	1	NA	contains following chiral atom(s)No Chiral atom	NA	NA	6.7562	7.5182	8.7692	107.83	98.976	113.06	370.282	1.48558	C17 H16 O2 Se1	ethyl 3-phenyl-3-(phenylselanyl)acrylate	100 K	None	None	colorless	None	None	None	None	D.Garcia-Lopez, M.G.Civit, C.M.Vogels, J.M.Ricart, S.A.Westcott, E.Fernandez, J.J.Carbo
CIFGEE	CHIRAL	Enantiopure + achiral molecule	NO	NO	P1	1	TRUE	FALSE	4.92	5	1	15	C	15	5	15	0	0	(5, RRR)	1	5	chiral	C1	6	5	5	Wa-could be Diast	contains following chiral atom(s)C	NA	NA	6.4444	10.941	16.0581	70.9653	89.3442	89.8008	1070.25	1.57632	C8 H6 Cl1 N1 O3,0.2(H2 O1)	endo-(R,R,R)-8-Chloro-4-hydroxy-3-oxo-2-oxabicyclo(2.2.2)oct-5-ene-8-carbonitrile hydrate	at 294 K	None	None	colorless	None	None	chloroform	None	Yi Wang, Hongming Li, Yong-Qiang Wang, Yan Liu, B.M.Foxman, Li Deng
CIFYOF	CHIRAL	Enantiopure	NO	NO	P1	1	TRUE	FALSE	4.6	1	1	13	C	13	10	7	6	0	(1, RRSRSSRRSRRSS)	1	1	chiral	C1	1	1	1	W1_enantiopure AU	contains following chiral atom(s)C	NA	NA	7.887	15.35	6.303	91.8	99.84	93.53	749.741	1.21091	C32 H50 O7	(20S)-20,22-Dihydrodigitoxigenin-3-(2,6-dideoxy-3,4-O-(1-methylethylidene)-Î²-D-ribo-hexopyranoside)	None	None	197-201deg.C	None	None	None	None	None	M.Kihara, K.Yoshioka, T.Deffo, D.S.Fullerton, D.C.Rohrer
CIFYOF10	CHIRAL	Enantiopure	NO	NO	P1	1	TRUE	FALSE	4.6	1	1	13	C	13	10	7	6	0	(1, RRSRSSRRSRRSS)	1	1	chiral	C1	1	1	1	W1_enantiopure AU	contains following chiral atom(s)C	NA	NA	7.887	15.35	6.303	91.8	99.84	93.53	749.741	1.21091	C32 H50 O7	3-((2,6-Dideoxy-3,4-o-(1-methylethylidene)-Î²-D-ribo-hexopyranosyl)oxy)-(20S)-20,22-dihydrodigitoxigenin	None	None	None	None	None	None	None	None	D.C.Rohrer, M.Kihara, T.Deffo, H.Rathore, K.Ahmed, A.H.L.From, D.S.Fullerton
CIHFOP	CHIRAL	Enantiopure	NO	NO	P1	1	TRUE	FALSE	3.72	2	1	6	C	6	6	4	2	0	(2, RRS)	1	2	chiral	C1	2	2	2	Wa-could be Diast	contains following chiral atom(s)C	NA	NA	8.6481	10.7316	13.3576	71.946	84.376	74.051	1133.17	1.26759	C26 H28 N2 O4	4-(1,2:3,4-Di-O-isopropyliden-D-xylo-1,2,3,4-tetrahydroxybutyl)-2,6-diphenylpyrimidine	at 173 K	None	408-411 K	colorless	None	None	ethyl acetate	None	I.Otero, K.Methling, H.Feist, M.Michalik, J.Quincoces, H.Reinke, K.Peseke
CILHAI	ACHIRAL	+ achiral molecule	NO	NO	P1	1	TRUE	FALSE	4.11	0	0	0	No Chiral atom	0	0	0	0	0						2	2	2	NA	contains following chiral atom(s)No Chiral atom	NA	NA	5.697	6.7973	12.0017	90	102.569	90	453.618	1.68634	C6 H6 N4 S3	2,2-Sulfanediylbis(5-methyl-1,3,4-thiadiazole)	at 293 K	None	None	None	None	None	None	None	R.K.Dani, M.K.Bharty, S.K.Kushawaha, S.Paswan, Om Prakash, R.K.Singh, N.K.Singh
CILNOE	CHIRAL	Enantiopure	NO	NO	P1	1	TRUE	FALSE	3.6	2	1	6	C	6	4	0	6	0	(2, SSS)	1	2	chiral	C1	2	2	2	Wa-could be Diast	contains following chiral atom(s)C	NA	NA	6.9206	12.624	15.6915	97.398	96.243	90.62	1351	1.23561	C32 H38 O5	3-2,3-dimethyl-2-{(2-oxo-2H-1-benzopyran-7-yl)oxymethyl}-6-(propan-2-ylidene)cyclohexylpropyl phenylacetate	110.8 K	None	None	None	None	None	None	None	Junchi Wang, Xiaoshuang Huo, Huaxiang Wang, Aijun Dong, Qi Zheng, Jianyong Si
CIQFOY	CHIRAL	Enantiopure + achiral molecule	NO	NO	P1	1	TRUE	FALSE	4.11	2	1	12	C	12	12	8	4	0	(2, SRRSRR)	1	2	chiral	C1	7	2	2	Wa-could be Diast	contains following chiral atom(s)C	NA	NA	5.7521	9.0344	20.7349	95.138	96.3386	108.464	1006.91	1.37674	C15 H24 N4 O7,2.5(H2 O1)	Isopropyl 6-amino-2,5-anhydro-6-N-(2,5-anhydro-6-azido-3,6-dideoxy-L-lyxo-hexonyl)-3,6-dideoxy-L-lyxo-hexonate hydrate	at 150 K	None	None	colorless	None	None	None	None	D.D.Le Pevelen, A.A.Edwards, G.E.Tranter, D.J.Watkin, G.W.J.Fleet
CIQNEV	CHIRAL	Enantiopure	NO	NO	P1	1	TRUE	FALSE	3.39	2	1	2	C	2	0	2	0	0	(2, R)	1	2	chiral	C1	2	2	2	Wa-could be Diast	contains following chiral atom(s)C	NA	NA	9.912	11.953	9.904	96.46	102.87	83.31	1131.59	1.23109	C21 H29 N3 O6	(3R)-3-Benzyl-3-t-butoxycarbonylamino-1-(3-aza-4-carboxy-2-oxo-4-methylpentyl)azetidin-2-one.	at 173 K	None	456-458K	colorless	None	None	None	None	C.Palomo, J.M.Aizpurua, A.Benito, R.Galarza, U.K.Khamrai, J.Vazquez, B.de Pascual-Teresa, P.M.Nieto, A.Linden
CIQTAB	CHIRAL	Enantiopure	NO	NO	P1	1	TRUE	FALSE	2.98	2	1	4	C Si	2	2	0	4	0	(2, SS)	1	2	chiral	C1	2	2	2	Wa-could be Diast	contains following chiral atom(s)C,Si	NA	NA	8.5151	9.1986	11.9741	95.386	103.171	116.829	793.764	1.11464	C14 H22 O3 Si1	2-{t-butyl(methyl)phenylsilyloxy}propanoic acid	300 K	None	None	light colorless	None	None	None	None	Tianbao Hu, Chen Zhao, Yan Zhang, Yuzhong Kuang, Lu Gao, Wanshu Wang, Zhishan Su, Zhenlei Song
CISDAN	CHIRAL	Enantiopure	NO	NO	P1	1	TRUE	FALSE	4.16	1	1	1	C	1	1	0	1	0	(1, S)	1	1	chiral	C1	1	1	1	W2_enantiopure AU	contains following chiral atom(s)C	NA	NA	5.7505	10.1642	10.166	64.806	86.086	89.691	536.232	1.30215	C25 H28 N2 O4	dimethyl 2-(5-benzyl-1,3,4,5-tetrahydro-2H-pyrido4,3-bindol-2-yl)pentanedioate	170 K	None	None	colorless	None	None	None	None	Jiaming Li, Zhencheng Lai, Weiwei Zhang, Linwei Zeng, Sunliang Cui
CISDOA	CHIRAL	Enantiopure	NO	NO	P1	1	TRUE	FALSE	3.8	2	1	2	C	2	0	2	0	0	(2, R)	1	2	chiral	C1	2	2	2	Wa-could be Diast	contains following chiral atom(s)C	NA	NA	6.045	9.9137	12.4644	80.579	83.075	84.118	728.904	1.54741	C8 H13 Cl3 N2 O4 S1	2,2,2-trichloroethyl (4-ethyl-4-methyl-1,3-oxazolidin-2-ylidene)sulfamate	293 K	None	None	colorless	None	None	methyl t-butyl ether	None	G.Grelier, R.Rey-Rodriguez, B.Darses, P.Retailleau, P.Dauban
CISHIZ	CHIRAL	Enantiopure	NO	NO	P1	1	TRUE	FALSE	4.56	1	1	4	C	4	4	2	2	0	(1, RSRS)	1	1	chiral	C1	1	1	1	W1_enantiopure AU	contains following chiral atom(s)C	NA	NA	5.3673	8.6715	9.8581	100.874	96.733	97.678	441.734	1.20065	C21 H21 N1 O2	methyl 3-methyl-5-phenyl-4-(phenylethynyl)prolinate	213 K	None	None	colorless	None	None	None	None	Bo-Ran Wang, Yan-Bo Li, Qi Zhang, Dingding Gao, Ping Tian, Qinghua Li, Liang Yin
CITBAK	CHIRAL	Enantiopure	NO	NO	P1	1	TRUE	FALSE	3.82	1	1	3	C	3	3	2	1	0	(1, SRR)	1	1	chiral	C1	1	1	1	W1_enantiopure AU	contains following chiral atom(s)C	NA	NA	6.079	10.67	11.313	98.558	104.133	102.473	678.866	1.2744	C29 H29 Cl1 N2 O5	Methyl 6-(((benzyloxy)carbonyl)amino)-4-(4-chlorophenyl)-1-(4-methoxyphenyl)-5-methyl-1,4,5,6-tetrahydropyridine-2-carboxylate	at 293 K	None	None	colorless	None	None	None	None	L.He, P.Retailleau, G.Masson
CIVFAR	CHIRAL	Enantiopure	NO	NO	P1	1	TRUE	FALSE	3.73	2	1	2	C	2	2	2	0	0	(2, R)	1	2	chiral	C1	2	2	2	Wa-could be Diast	contains following chiral atom(s)C	NA	NA	8.1392	8.6999	14.6688	84.85	84.541	63.973	927.791	1.29032	C19 H24 N2 O3 S1	(+)-(R,E)-N,N-Dimethyl-2-6-methyl-2-p-tosyl-2,3,3a,4-tetrahydrocyclopentacpyrrol-5(1H)-ylideneacetamide	193 K	None	None	colorless	None	None	None	None	Shunsuke Suzuki, Shuhei Nishigaki, Yu Shibata, K.Tanaka
CIWGUL	CHIRAL	Enantiopure + achiral molecule	NO	NO	P1	1	TRUE	FALSE	4.2	2	1	12	C	12	2	6	6	0	(2, SSRRSR)	1	2	chiral	C1	3	2	2	Wa-could be Diast	contains following chiral atom(s)C	NA	NA	7.627	12.066	12.701	63.76	82.24	80.17	1030.65	1.36665	C20 H28 O6,0.5(C1 H1 Cl3)	Diaporthein B chloroform solvate	at 173.1 K	None	None	colorless	None	None	None	None	S.Yoshida, K.Kito, T.Ooi, K.Kanoh, Y.Shizuri, T.Kusumi
CIWYIU	CHIRAL	Enantiopure	NO	NO	P1	1	TRUE	FALSE	4.76	2	1	10	C P	8	4	8	2	0	(2, RRSRR)	1	2	chiral	C1	2	2	2	Wa-could be Diast	contains following chiral atom(s)C,P	NA	NA	8.9711	12.5936	13.3786	63.086	74.155	69.466	1250.27	1.30335	C28 H31 O2 P1 S1 Si1	3a,6a-dimethyl-7-{(triphenylsilyl)oxymethyl}hexahydro-5H-3,5-methano-5-phospholo3,4-bfuran-5-thione	130 K	None	None	colorless	None	None	None	None	K.Ramazanova, S.Chakrabortty, F.Kallmeier, N.Kretzschmar, S.Tin, P.Lonnecke, J.G.de Vries, E.Hey-Hawkins
CIXHAV	CHIRAL	Enantiopure	NO	NO	P1	1	TRUE	FALSE	3.39	2	1	2	C	2	0	0	2	0	(2, S)	1	2	chiral	C1	2	2	2	Wa-could be Diast	contains following chiral atom(s)C	NA	NA	5.6287	7.6818	17.4646	80.975	86.238	89.259	744.186	1.51617	C16 H13 Cl1 F3 N3	2-(chloromethyl)-1-(4-(E)-phenyldiazenylphenyl)-2-(trifluoromethyl)aziridine	100 K	None	None	colorless	None	None	None	None	L.Ielo, S.Touqeer, A.Roller, T.Langer, Wolfgang Holzer, V.Pace
CIYPAC	ACHIRAL	+ achiral molecule	NO	NO	P1	1	TRUE	FALSE	2.78	0	0	0	No Chiral atom	0	0	0	0	0						2	2	2	NA	contains following chiral atom(s)No Chiral atom	NA	NA	8.9068	10.5174	11.9303	71.989	84.932	70.971	1004.65	1.21812	C18 H28 N2 O4 S1	(R)-Ethyl 4-methyl-5-((t-butylsulfinyl)iminomethyl)-3-(pent-4-en-1-yloxy)-1H-pyrrole-2-carboxylate	at 123 K	None	79 deg.C	colorless	None	None	None	None	G.Dirscherl, P.Rooshenas, P.R.Schreiner, F.Lamaty, B.Konig
CIZLAB	CHIRAL	Enantiopure	NO	NO	P1	1	TRUE	FALSE	3.23	1	1	2	C	2	1	1	1	0	(1, SR)	1	1	chiral	C1	1	1	1	W1_enantiopure AU	contains following chiral atom(s)C	NA	NA	6.35111	9.4376	10.1184	100.626	91.943	97.166	590.426	1.14064	C27 H35 N1 O2	t-butyl 1-(2,3-dimethylbenzyl)-2-(1-phenylprop-2-en-1-yl)prolinate	99.9 K	None	None	light colorless	None	None	None	None	Hyunkyung Cho, Hongjun Jeon, Jae Eui Shin, S.Lee, S.Park, Sanghee Kim
CIZQAD01	ACHIRAL	+ achiral molecule	NO	NO	P1	1	TRUE	FALSE	4.1	0	0	0	No Chiral atom	0	0	0	0	0						12	4	4	NA	contains following chiral atom(s)No Chiral atom	NA	NA	8.57	13.63	14.868	84.26	81.92	87.07	1709.64	1.33957	C17 H13 Cl1 N4,2(H2 O1)	8-Chloro-1-methyl-6-phenyl-4H-1,2,4-triazolo(4,3-a)(1,4)benzodiazepine dihydrate	None	None	None	colorless	None	None	None	None	G.Reck, W.Thiel, F.Bahr, W.Sauer, D.Scharfenberg-Pfeiffer, K.-F.Landgraf
CLAVIC	CHIRAL	Enantiopure	NO	NO	P1	1	TRUE	FALSE	4.2	2	1	4	C	4	4	2	2	0	(2, RS)	1	2	chiral	C1	2	2	2	Wa-could be Diast	contains following chiral atom(s)C	NA	NA	5.669	8.282	15.183	99.18	100.47	86.45	691.607	1.2981	C16 H18 N2 O2	Clavicipitic acid	None	None	262deg.C(dec.)	None	None	None	None	None	J.E.Robbers, H.Otsuka, H.G.Floss, E.V.Arnold, J.Clardy
CMXLCS01	CHIRAL	Enantiopure	NO	NO	P1	1	TRUE	FALSE	2.14	1	1	1	C	1	1	1	0	0	(1, R)	1	1	chiral	C1	1	1	1	W2_enantiopure AU	contains following chiral atom(s)C	NA	NA	4.7029	5.0418	8.133	85.3347	87.2699	74.7011	185.323	1.74898	C5 H9 N1 O5 S1	2-azaniumyl-3-(carboxymethanesulfinyl)propanoate	100 K	None	None	colorless	triclinic polymorph	None	None	None	J.K.Waters, S.P.Kelley, V.V.Mossine, T.P.Mawhinney
COBFIK	ACHIRAL	+ achiral molecule	NO	NO	P1	1	TRUE	FALSE	4.05	0	0	0	No Chiral atom	0	0	0	0	0						1	1	1	NA	contains following chiral atom(s)No Chiral atom	NA	NA	3.8783	6.0514	10.474	103.711	92.154	90.341	238.614	1.56631	C10 H6 Cl2 N2	5,5-Dichloro-2,2-bipyridine	at 296 K	None	None	colorless	None	None	None	None	J.S.Dhaua, Amritpal Singh, Y.Kasetti, S.Bhatia, P.V.Bharatam, P.Brandao, V.Felix, K.N.Singh
COBQEP	CHIRAL	Enantiopure	NO	NO	P1	1	TRUE	FALSE	3.9	2	1	14	C	14	10	8	6	0	(2, RRRRSSS)	1	2	chiral	C1	2	2	2	Wa-could be Diast	contains following chiral atom(s)C	NA	NA	7.869	10.113	10.771	76.21	85.78	84.6	827.586	1.22164	C19 H28 O3	3Î±-Hydroxy-5Î±-androstane-4,17-dione	None	None	None	colorless	None	None	ethyl acetate/hexane	None	L.C.R.Andrade, J.A.Paixao, M.J.de Almeida, E.J.Tavares da Silva, M.L.Sa e Melo, A.S.Campos Neves
COCHOT	CHIRAL	Enantiopure	NO	NO	P1	1	TRUE	FALSE	2.83	1	1	1	C	1	0	1	0	0	(1, R)	1	1	chiral	C1	1	1	1	W2_enantiopure AU	contains following chiral atom(s)C	NA	NA	6.9374	7.651	12.436	95.1307	94.2669	90.5343	655.527	1.44747	C27 H27 Br1 N2 O7	(R)-4-(4-(Benzyloxy)-3-bromophenyl)-4-methylhexyl 3,5-dinitrobenzoate	at 150 K	None	None	yellow	None	None	acetone	None	Tian-Sheng Mei, H.H.Patel, M.S.Sigman
COCYEZ	CHIRAL	Enantiopure	NO	NO	P1	1	TRUE	FALSE	3.86	2	1	4	C	4	4	0	4	0	(2, SS)	1	2	chiral	C1	2	2	2	Wa-could be Diast	contains following chiral atom(s)C	NA	NA	5.422	9.902	13.443	80.42	78.61	89.13	697.539	1.34895	C16 H17 N3 O2	Cyclo(L-tryptophanyl-L-prolyl)	at 291 K	None	None	colorless	None	None	chloroform/n-hexane	None	G.D.Grant, A.L.Hunt, P.J.Milne, H.M.Roos, J.A.Joubert
CODNOB	CHIRAL	Enantiopure	NO	NO	P1	1	TRUE	FALSE	4.63	2	1	2	C	2	2	0	2	0	(2, S)	1	2	chiral	C1	2	2	2	Wa-could be Diast	contains following chiral atom(s)C	NA	NA	7.3973	11.0738	12.082	69.81	77.629	77.212	895.524	1.26227	C20 H20 O5	1,8-dihydroxy-3,6-dimethyl-9-(2-methylprop-1-en-1-yl)-9H-xanthene-2-carboxylic acid	193 K	None	None	colorless	None	None	None	None	N.D.Paguigan, J.Rivera-Chavez, J.J.Stempin, M.Augustinovic, A.I.Noras, H.A.Raja, D.A.Todd, K.D.Triplett, Cynthia Day, M.Figueroa, P.R.Hall, N.B.Cech, N.H.Oberlies
COFJOW	CHIRAL	Enantiopure	NO	NO	P1	1	TRUE	FALSE	2.7	2	1	8	C	8	4	6	2	0	(2, RSRR)	1	2	chiral	C1	2	2	2	Wa-could be Diast	contains following chiral atom(s)C	NA	NA	9.7	10.276	11.082	106.682	92.733	91.04	1056.34	1.25285	C26 H26 N2 O2	(2S,4S,5R,2S)-N,N-Ethylene-2,4-dimethyl-5,2-diphenyl-4,5-benzo-2,2-bioxazolidinyl	None	None	184-186deg.C	white	None	None	chloroform/hexane	None	A.Ortiz, N.Farfan, H.Hopfl, R.Santillan, M.E.Ochoa, A.Gutierrez
COFLUE	CHIRAL	Enantiopure	NO	NO	P1	1	TRUE	FALSE	4.3	1	1	12	C	12	8	3	9	0	(1, SRSSSRSSSSRS)	1	1	chiral	C1	1	1	1	W1_enantiopure AU	contains following chiral atom(s)C	NA	NA	6.1132	10.245	15.216	82.4	82.188	76.62	913.466	1.25572	C36 H50 O13	12-Acetoxybeyer-15-ene-18-carboxy Î²-D-glucopyranoside	None	None	192-194deg.C	None	None	None	None	None	Wang-Hong Lin, Jim-Min Fang, Yu-Shia Cheng
COJPIC	CHIRAL	Enantiopure	NO	NO	P1	1	TRUE	FALSE	2.13	2	1	2	C	2	0	0	2	0	(2, S)	1	2	chiral	C1	2	2	2	Wa-could be Diast	contains following chiral atom(s)C	NA	NA	7.07122	9.3375	9.59261	80.2567	81.5898	78.7909	608.108	1.3719	C10 H12 F3 N1 O3	ethyl 2-acetamido-2-(trifluoromethyl)pent-4-ynoate	at 100.0 K	None	None	colorless	None	None	None	None	S.Fustero, J.Miro, M.Sanchez-Rosello, C.del Pozo
COMCIQ	CHIRAL	Enantiopure	NO	NO	P1	1	TRUE	FALSE	2.3	1	1	6	C	6	6	5	1	0	(1, RSRRRR)	1	1	chiral	C1	1	1	1	W1_enantiopure AU	contains following chiral atom(s)C	NA	NA	7.3157	8.9781	10.8726	75.09	79.93	69.8	644.717	1.40504	C21 H27 N3 O12 S1	O2,O3,O5-Triacetyl-6-acetylamino-1,6-dideoxy-1-Î±-(1,2,3,4-tetrahydro-3-methyl-2,4-dioxo-1-pyrimidinyl)-4-thio-L-glycero-L-idoheptofuranuronic acid methyl ester S-((R)-oxide)	None	None	495 K	None	None	None	None	dx reported as 1.405; we calculate 1.29. c should be 10.8726, not 11.8726	G.Benz, L.Born, M.Brieden, R.Grosser, J.Kurz, H.Paulsen, V.Sinnwell, B.Weber
CONGIX	CHIRAL	Enantiopure	NO	NO	P1	1	TRUE	FALSE	3.51	2	1	4	C	4	4	2	2	0	(2, SR)	1	2	chiral	C1	2	2	2	Wa-could be Diast	contains following chiral atom(s)C	NA	NA	8.2591	8.5961	8.6725	85.16	67.815	83.043	565.434	1.3057	C12 H14 O2 S1	3,4,4-trimethyl-3b,4,4a,5-tetrahydrocyclopropa3,4cyclopenta1,2-cthiophene-1-carboxylic acid	293 K	None	None	None	None	None	None	None	M.H.Bolli, J.Velker, C.Muller, B.Mathys, M.Birker, R.Bravo, D.Bur, R.de Kanter, P.Hess, C.Kohl, D.Lehmann, S.Meyer, O.Nayler, M.Rey, M.Scherz, B.Steiner
CONPAW	ACHIRAL	+ achiral molecule	NO	NO	P1	1	TRUE	FALSE	3.2	0	0	0	No Chiral atom	0	0	0	0	0						2	1	1	NA	contains following chiral atom(s)No Chiral atom	NA	NA	7.37	8.871	9.159	100.55	96.4	96.77	579.127	1.2632	C20 H14 O2,C8 H10 O1 S1	(R)-(+)-bis-Î²-Naphthol (R)-(+)-methyl m-tolyl-sulfoxide	None	None	425-427 K	colorless	None	None	None	None	F.Toda, K.Tanaka, T.C.W.Mak
CORLED	CHIRAL	Enantiopure	NO	NO	P1	1	TRUE	FALSE	4.27	1	1	2	C	2	1	1	1	0	(1, SR)	1	1	chiral	C1	1	1	1	W1_enantiopure AU	contains following chiral atom(s)C	NA	NA	6.5325	7.8576	8.6225	109.428	94.781	113.321	371.287	1.23605	C19 H20 N2	3-ethylidene-4-methylidene-2,3,4,5,10,10a-hexahydro-1,3a-ethanopyrrolo3,2-bcarbazole	100.2 K	None	above 503 K	colorless	None	None	methanol	None	Soon-Kit Wong, Suet-Pick Wong, Kae-Shin Sim, Siew-Huah Lim, Yun-Yee Low, T.-S.Kam
COSQOT	CHIRAL	Enantiopure	NO	NO	P1	1	TRUE	FALSE	3.64	2	1	2	C	2	2	2	0	0	(2, R)	1	2	chiral	C1	2	2	2	Wa-could be Diast	contains following chiral atom(s)C	NA	NA	4.832	9.1394	20.737	83.156	89.865	82.13	900.598	1.10804	C18 H36 O3	9-hydroxyoctadecanoic acid	100 K	None	None	colorless	polymorph 1	None	None	None	F.Asaro, C.Boga, N.Demitri, R.De Zorzi, S.Drioli, L.Gigli, G.Micheletti, P.Nitti, Ennio Zangrando
COTBIY	CHIRAL	Enantiopure	NO	NO	P1	1	TRUE	FALSE	4.42	2	1	4	C	4	4	4	0	0	(2, RR)	1	2	chiral	C1	2	2	2	Wa-could be Diast	contains following chiral atom(s)C	NA	NA	7.32713	11.1278	19.6664	106.211	91.7015	93.2437	1535.54	1.45463	C34 H34 Br1 N5 O5	2-(3-hydroxy-4-(3-methoxy-4-((7-(2-methoxyphenyl)pyrrolo2,1-f1,2,4triazin-2-yl)amino)phenyl)piperidin-1-yl)ethyl 4-bromobenzoate	at 110 K	None	None	yellow	None	None	None	None	E.F.Mesaros, T.S.Angeles, M.S.Albom, J.C.Wagner, L.D.Aimone, Weihua Wan, Lihui Lu, Zeqi Huang, M.Olsen, E.Kordwitz, R.Curtis Haltiwanger, A.J.Landis, Mangeng Cheng, B.A.Ruggeri, M.A.Ator, B.D.Dorsey, G.R.Ott
COVBEV	CHIRAL	Enantiopure	NO	NO	P1	1	TRUE	FALSE	4.36	10	1	10	C	10	10	10	0	0	(10, R)	1	10	chiral	C1	10	10	10	Wa-could be Diast	contains following chiral atom(s)C	NA	NA	12.795	13.528	18.54	80.228	87.238	89.993	3158.76	1.60425	C14 H13 Br1 N2 O1	8-bromo-1,2,5,6,11,11b-hexahydroindolizino8,7-bindol-3-one	at 193 K	None	None	colorless	None	None	None	None	I.T.Raheem, P.S.Thiara, E.A.Peterson, E.N.Jacobsen
COVQEM	CHIRAL	Enantiopure	NO	NO	P1	1	TRUE	FALSE	3.44	4	1	4	C	4	4	0	4	0	(4, S)	1	4	chiral	C1	4	4	4	Wa-could be Diast	contains following chiral atom(s)C	NA	NA	11.3709	16.302	18.9804	80.8044	87.0765	89.8315	3468.57	1.22507	C33 H45 N5 O8	N-(benzyloxy)carbonylphenylalanyl-2-methylalanyl-2-methylalanyl-2-methylalanyl-2-methylalanine	150 K	None	None	colorless	None	None	None	None	A.D.Peters, G.F.S.Whitehead, S.J.Webb
COVRAI	CHIRAL	Enantiopure	NO	NO	P1	1	TRUE	FALSE	3.33	2	1	2	C	2	2	0	2	0	(2, S)	1	2	chiral	C1	2	2	2	Wa-could be Diast	contains following chiral atom(s)C	NA	NA	5.6268	10.6892	19.4869	86.892	85.318	80.176	1150.05	1.30969	C28 H27 N3 O3	methyl N-(1-(3-methyl-5-oxo-1-phenyl-1,5-dihydro-4H-pyrazol-4-ylidene)-2-phenylethyl)phenylalaninate	at 173 K	None	None	colorless	None	None	None	None	Fei-Ran Li, Xin Zhang, Dong-Dong Wang, Zhi-Na Xue, Ying-Ke Ma
COWDOJ	CHIRAL	Enantiopure + achiral molecule	NO	NO	P1	1	TRUE	FALSE	4.66	2	1	8	C	8	8	6	2	0	(2, RRSR)	1	2	chiral	C1	4	2	2	Wa-could be Diast	contains following chiral atom(s)C	NA	NA	9.0722	10.3704	12.3104	100.154	103.516	105.629	1048.48	1.47441	C19 H19 N3 O7 S1,C1 H4 O1	2-(3,4-Dihydroxy-5-(hydroxymethyl)tetrahydrofuran-2-yl)-6-(5-(4-methoxyphenyl)-2-thienyl)-1,2,4-triazine-3,5(2H,4H)-dione methanol solvate	at 100 K	None	None	yellow	None	None	None	None	P.A.Hopkins, R.W.Sinkeldam, Y.Tor
COWFAX	CHIRAL	Enantiopure + achiral molecule	NO	NO	P1	1	TRUE	FALSE	4.01	2	1	8	C	8	8	6	2	0	(2, RRRS)	1	2	chiral	C1	3	2	2	Wa-could be Diast	contains following chiral atom(s)C	NA	NA	9.4297	10.0067	10.3843	74.895	77.875	76.982	909.688	1.59693	C18 H16 F1 N3 O6 S1,0.5(C1 H4 O1)	5-(5-(4-Fluorophenyl)thiophen-2-yl)-6-azauridine	at 100 K	None	None	yellow	None	None	None	None	P.A.Hopkins, R.W.Sinkeldam, Y.Tor
COWMAF	CHIRAL	Enantiopure	NO	NO	P1	1	TRUE	FALSE	4.28	2	1	2	C	2	2	2	0	0	(2, R)	1	2	chiral	C1	2	2	2	Wa-could be Diast	contains following chiral atom(s)C	NA	NA	8.1641	10.713	15.9792	76.587	84.953	89.07	1354.17	1.28512	C31 H26 Cl1 N3 O3	2-(1H-benzimidazol-2-yl)-6-chloro-4-(1-phenylbutyl)carbamoyl1,1-biphenyl-2-carboxylic acid	203 K	None	None	colorless	None	None	methanol/ isopropanol	None	Shun Su, A.Clarke, Ying Han, H.J.Chao, J.Bostwick, W.Schumacher, Tao Wang, Mujing Yan, Mei-Yin Hsu, E.Simmons, Chiuwa Luk, C.Xu, M.Dabros, M.Galella, J.Onorato, D.Gordon, R.Wexler, P.S.Gargalovic, R.Michael Lawrence
COWNOR	CHIRAL	Enantiopure + achiral molecule	NO	NO	P1	1	TRUE	FALSE	3.9	1	1	8	C	8	8	5	3	0	(1, RSRRRSSR)	1	1	chiral	C1	2	1	1	W1_enantiopure AU	contains following chiral atom(s)C	NA	NA	8.62	8.898	8.1	111.86	90.27	72.11	544.478	1.49285	C16 H29 N3 O11 S1,H2 O1	4-O-(2-Acetylamino-2-deoxy-Î²-D-glucopyranosyl)-4-hydroxy-5-hydroxymethyl-prolyl-taurine monohydrate	None	None	467-468 K	colorless	None	None	None	Two positions are given for the hydrogen atom attached to atom N7. One set only is retained	S.Shinagawa, F.Kasahara, Y.Wada, S.Harada, M.Asai
COWPAH	CHIRAL	Enantiopure	NO	NO	P1	1	TRUE	FALSE	4.28	1	1	5	C	5	5	3	2	0	(1, SSRRR)	1	1	chiral	C1	1	1	1	W1_enantiopure AU	contains following chiral atom(s)C	NA	NA	5.0198	9.5967	10.9206	84.776	82.397	83.744	516.783	1.29298	C17 H26 N2 O9	(3-acetamido-4,5-diacetoxypiperidine-2,6-diyl)bis(methylene) diacetate	at 298 K	None	None	colorless	None	None	None	None	Y.Bleriot, N.Auberger, Y.Jagadeesh, C.Gauthier, G.Prencipe, Anh Tuan Tran, J.Marrot, J.Desire, A.Yamamoto, A.Kato, M.Sollogoub
COYKUY	CHIRAL	Enantiopure	NO	NO	P1	1	TRUE	FALSE	3.12	3	1	9	C	9	9	6	3	0	(3, RRS)	1	3	chiral	C1	3	3	3	Wa-could be Diast	contains following chiral atom(s)C	NA	NA	4.7589	13.8113	14.7638	111.443	93.454	97.667	888.859	2.07458	C9 H11 I1 N2 O4 S1	1-(4-hydroxy-5-(hydroxymethyl)tetrahydrofuran-2-yl)-5-iodo-4-thioxo-3,4-dihydropyrimidin-2(1H)-one	at 120 K	None	None	yellow	None	None	None	None	Xiao-Hui Zhang, Hong-Yan Yin, G.Trigiante, R.Brem, P.Karran, M.B.Pitak, S.J.Coles, Yao-Zhong Xu
COYSOY	CHIRAL	Contains at least 2 different chemicals in enantiopure proportions	NO	NO	P1	1	TRUE	FALSE	4.4	2	2	17	C	17	9	10	7	0	(1, RRSSRSSR), (1, RRRRRSSSR)	1, 1	1, 1	chiral, chiral	C1	2	1	1	W1_enantiopure AU	contains following chiral atom(s)C	NA	NA	13.562	14.492	7.691	93.61	90.77	71.31	1429	1.0894	C32 H52 O2,C32 H52 O2	D:C-Friedolup-8-en-3Î²-ol acetate D:C-friedolup-9(11)-en-3Î²-ol acetate complex	None	None	None	colorless	None	None	None	None	H.Nakai, M.Shiro, T.Tozyo, H.Ishii, Zhen-Wen Xu
COZKEI	CHIRAL	Enantiopure	NO	NO	P1	1	TRUE	FALSE	3.83	2	1	16	C	16	12	8	8	0	(2, SRSRRSSR)	1	2	chiral	C1	2	2	2	Wa-could be Diast	contains following chiral atom(s)C	NA	NA	12.1282	14.2574	15.6294	71.584	79.929	77.645	2487.96	1.10954	C54 H80 F2 O4	Cholest-5-en-3-yl 5-((4-(decyloxy)-2,3-difluoro-4-biphenylyl)oxy)pentanoate	at 293 K	None	356.4 K	None	None	None	dichloromethane/ethanol	None	R.K.Sharma, V.K.Gupta, M.Mathews, C.V.Yelamaggad
CUDCAG	CHIRAL	Enantiopure	NO	NO	P1	1	TRUE	FALSE	2.74	1	1	4	C	4	4	3	1	0	(1, RSRR)	1	1	chiral	C1	1	1	1	W1_enantiopure AU	contains following chiral atom(s)C	NA	NA	5.416	5.8236	6.6006	102.836	104.776	102.824	187.504	1.56888	C6 H11 N1 O5	(2S,3R,4R,5R)-3,4-Dihydroxy-5-(hydroxymethyl)pyrrolidine-2-carboxylic acid	at 150 K	None	449 K(dec.)	colorless	None	None	ethanol/water	None	D.Best, S.F.Jenkinson, A.L.Thompson, D.J.Watkin, F.X.Wilson, R.J.Nash, G.W.J.Fleet
CUDVEE	CHIRAL	Enantiopure + achiral molecule	NO	NO	P1	1	TRUE	FALSE	2.8	1	1	9	C	9	4	3	6	0	(1, SSRRRSSSS)	1	1	chiral	C1	2	1	1	W1_enantiopure AU	contains following chiral atom(s)C	NA	NA	6.4921	6.6064	11.634	95.277	99.55	110.967	453.232	1.45243	C20 H26 O7,H2 O1	6,9,16-trihydroxy-5,15-dimethyl-8,13,17-trioxahexacyclo14.2.2.11,12.02,10.05,9.015,21henicos-10-en-14-one monohydrate	at 92 K	None	None	colorless	None	None	None	None	M.M.Onakpa, Ming Zhao, T.Godecke, Wei-Lun Chen, Chun-Tao Che, B.D.Santarsiero, S.M.Swanson, I.U.Asuzu
CUGMAT	CHIRAL	Enantiopure	NO	NO	P1	1	TRUE	FALSE	3.13	2	1	10	C	10	8	6	4	0	(2, RRSSR)	1	2	chiral	C1	2	2	2	Wa-could be Diast	contains following chiral atom(s)C	NA	NA	7.2138	7.283	12.1817	104.569	94.893	112.656	559.607	1.27155	C11 H18 O4	4-Hydroxy-3-methoxy-4,7-dimethylhexahydrocyclopentacpyran-1(3H)-one	at 173 K	None	None	None	None	None	None	None	M.Willot, L.Radtke, D.Konnig, R.Frohlich, V.H.Gessner, C.Strohmann, M.Christmann
CUHZAH	CHIRAL	Enantiopure	NO	NO	P1	1	TRUE	FALSE	3.66	2	1	4	C	4	4	2	2	0	(2, RS)	1	2	chiral	C1	2	2	2	Wa-could be Diast	contains following chiral atom(s)C	NA	NA	6.296	6.743	9.347	95.088	93.518	91.218	394.366	1.91209	C9 H7 Br1 O2	3-Bromobicyclo3.2.2nona-3,8-diene-2,6-dione	at 100 K	None	None	None	None	None	None	None	Pingfan Li, H.Yamamoto
CUKDAN10	RACEMATE	Strict definition of kryptoracemate	KRYPTORACEMIC	NO	P1	1	TRUE	FALSE	4	2	1	4	C	4	0	2	2	0	(1, SR), (1, RS)	2	2	racemic	C1	2	2	2	RAC-1	contains following chiral atom(s)C	NA	NA	8.91	13.703	6.252	93.18	80.29	102.92	733.221	1.16119	C15 H16 N2 S1	2-t-Butylthio-1,2-dicyano-1-phenyl-cyclopropane	None	None	None	colorless	None	None	None	Published bond lengths are mean values for the two independent molecules	B.Tinant, San Wu, J.P.Declercq, M.van Meerssche, A.De Mesmaeker, W.Masamba, R.Merenyi, H.G.Viehe
CUNBET	CHIRAL	Enantiopure	NO	NO	P1	1	TRUE	FALSE	3.5	4	1	20	C	20	20	12	8	0	(4, RRSRS)	1	4	chiral	C1	4	4	4	Wa-could be Diast	contains following chiral atom(s)C	NA	NA	5.7553	11.791	16.211	98.611	90.003	90.004	1087.69	1.41816	C13 H12 O4	2-Phenylhexahydro-5H-furo3,2-boxeto2,3-dfuran-5-one	at 293 K	None	419 K	None	None	None	None	None	V.Popsavin, G.Benedekovic, B.Sreco, J.Francuz, M.Popsavin, V.Kojic, G.Bogdanovic, V.Divjakovic
CUPVUG	CHIRAL	Enantiopure	NO	NO	P1	1	TRUE	FALSE	4.09	1	1	1	C	1	0	1	0	0	(1, R)	1	1	chiral	C1	1	1	1	W2_enantiopure AU	contains following chiral atom(s)C	NA	NA	5.0899	5.9338	14.844	81.526	86.803	67.468	409.582	1.55772	C16 H18 Br1 N1 O5	(3-(3-methoxy-3-oxopropyl)-5-methyl-4,5-dihydro-1,2-oxazol-5-yl)methyl 4-bromobenzoate	173.2 K	None	None	colorless	None	None	None	None	Xiaoyu Han, Li Dong, Caiwei Geng, Peng Jiao
CUTVUJ	CHIRAL	Enantiopure	NO	NO	P1	1	TRUE	FALSE	3.45	2	1	10	C	10	10	10	0	0	(2, RRRRR)	1	2	chiral	C1	2	2	2	Wa-could be Diast	contains following chiral atom(s)C	NA	NA	6.373	6.623	10.22	88.89	72.96	75.9	399.377	1.54778	C6 H9 F3 O3	3,4,5-Trifluoro-6-(hydroxymethyl)tetrahydro-2H-pyran-2-ol	at 93 K	None	376-378 K	colorless	None	None	chloroform	None	S.Bresciani, T.Lebl, A.M.Z.Slawin, D.OHagan
CUVFOO	CHIRAL	Enantiopure	NO	NO	P1	1	TRUE	FALSE	4	1	1	1	C	1	1	1	0	0	(1, R)	1	1	chiral	C1	1	1	1	W2_enantiopure AU	contains following chiral atom(s)C	NA	NA	5.101	10.195	5.02	96.72	111.27	95.63	238.806	1.56652	C6 H11 N1 O4 S2	L-2-Amino-4,5-dithiaoctanedioic acid	None	None	None	None	None	None	None	None	M.Rajeswaran, R.Parthasarathy
CUVKEL	CHIRAL	Enantiopure	NO	NO	P1	1	TRUE	FALSE	3.5	2	1	6	C	6	6	6	0	0	(2, RRR)	1	2	chiral	C1	2	2	2	Wa-could be Diast	contains following chiral atom(s)C	NA	NA	9.8833	10.0297	12.2726	113.934	99.932	104.892	1020.49	1.12439	C20 H27 N1 O2 S1	(S)-N-((1R,2R,3R)-3-Hydroxy-2-methyl-1,3-diphenylpropyl)-2-methylpropane-2-sulfinamide	296 K	None	433-438 K	colorless	None	None	None	None	V.M.Foley, C.M.McSweeney, K.S.Eccles, S.E.Lawrence, G.P.McGlacken
CUWBIG	ACHIRAL	+ achiral molecule	NO	NO	P1	1	TRUE	FALSE	2.73	0	0	0	No Chiral atom	0	0	0	0	0						1	1	1	NA	contains following chiral atom(s)No Chiral atom	NA	NA	8.9639	9.3652	10.9091	96.684	95.668	115.291	811.076	1.25427	C41 H30 N2 P2	(R)-2-(Diphenylphosphino)-1-(2-(diphenylphosphino)-1-naphthyl)-1H-benzimidazole	at 180 K	None	492-494 K	colorless	None	None	dichloromethane/pentane	None	I.Abdellah, N.Debono, Y.Canac, L.Vendier, R.Chauvin
CUWBOM	ACHIRAL	+ achiral molecule	NO	NO	P1	1	TRUE	FALSE	4.37	0	0	0	No Chiral atom	0	0	0	0	0						1	1	1	NA	contains following chiral atom(s)No Chiral atom	NA	NA	8.9539	9.3626	10.9109	96.682	95.659	115.296	810.074	1.25582	C41 H30 N2 P2	(S)-2-(Diphenylphosphino)-1-(2-(diphenylphosphino)-1-naphthyl)-1H-benzimidazole	at 180 K	None	496-498 K	colorless	None	None	dichloromethane/pentane	Study temperature given as 180 K and 110 K in the CIF	I.Abdellah, N.Debono, Y.Canac, L.Vendier, R.Chauvin
CUXMIS	CHIRAL	Contains at least 2 different chemicals in enantiopure proportions	NO	NO	P1	1	TRUE	FALSE	3.82	4	2	6	C	6	6	6	0	0	(2, RR), (2, R)	1, 1	2, 2	chiral, chiral	C1	4	2	2	Wa-could be Diast	contains following chiral atom(s)C	NA	NA	9.4688	9.5958	17.236	78.78	82.12	79.09	1500.18	1.19478	C31 H30 O4,C4 H11 N1	(2,2-Dimethyl-1,3-dioxolane-4,5-diyl)bis(diphenylmethanol) (R)-butan-2-amine solvate	at 173 K	None	None	colorless	None	None	None	None	N.B.Bathori, L.R.Nassimbeni
CUYQIW	CHIRAL	Enantiopure	NO	NO	P1	1	TRUE	FALSE	4	2	1	6	C	6	4	2	4	0	(2, RSS)	1	2	chiral	C1	2	2	2	Wa-could be Diast	contains following chiral atom(s)C	NA	NA	7.854	9.384	13.23	101.563	103.699	90.184	926.796	1.43471	C21 H20 O8	5a-Hydroxy-5-(4-hydroxy-3,5-dimethoxyphenyl)-5,5a,6,8,8a,9-hexahydro-furo3,4:6,7naphtho2,3-d-1,3-dioxol-6-one	None	None	None	colorless	None	None	None	None	D.Du Boulay, K.Shaari, B.W.Skelton, P.G.Waterman, A.H.White
CUZJEO	ACHIRAL	+ achiral molecule	NO	NO	P1	1	TRUE	FALSE	3.8	0	0	0	No Chiral atom	0	0	0	0	0						1	1	1	NA	contains following chiral atom(s)No Chiral atom	NA	NA	5.8623	8.3411	10.9619	90	90	90	536.015	0.427786	C3 H2 N6 O1	tetrazolo1,5-b1,2,4triazin-7(8H)-one	None	None	None	None	None	None	None	None	Xiuxiu Zhao, Shaowen Zhang, Shenghua Li, Jia Lu, Jichuan Zhang, Siping Pang
CUZYIG	CHIRAL	Enantiopure	NO	NO	P1	1	TRUE	FALSE	4.26	1	1	3	C	3	2	3	0	0	(1, RRR)	1	1	chiral	C1	1	1	1	W1_enantiopure AU	contains following chiral atom(s)C	NA	NA	6.7366	8.1325	10.369	78.418	82.601	86.431	551.482	1.32026	C24 H26 N2 O6	(R,R,R)-2-(Bicyclo4.1.0hept-1-yl)-4-phenylbutyl 3,5-dinitrobenzoate	at 173 K	None	None	colorless	None	None	None	None	T.Satoh, T.Kuramoto, S.Ogata, H.Watanabe, T.Saitoh, M.Tadokoro
CUZZED	CHIRAL	Enantiopure	NO	NO	P1	1	TRUE	FALSE	4.52	1	1	2	C	2	2	2	0	0	(1, RR)	1	1	chiral	C1	1	1	1	W1_enantiopure AU	contains following chiral atom(s)C	NA	NA	10.6129	10.7329	12.5667	95.144	108.538	112.916	1212.13	1.22075	C62 H54 N2 O4	3,3-(Cyclohexane-1,2-diylbis(iminomethylene))bis(2-(benzyloxy)-1,1-binaphthalen-2-ol)	at 298 K	None	457-461 K	None	None	None	None	None	Donglu Xiong, Mei Wu, Shoufeng Wang, Fuwei Li, Chungu Xia, Wei Sun
DABWUZ	CHIRAL	Enantiopure	NO	NO	P1	1	TRUE	FALSE	4.25	2	1	18	C	18	8	12	6	0	(2, SRRRRRRSS)	1	2	chiral	C1	2	2	2	Wa-could be Diast	contains following chiral atom(s)C	NA	NA	7.2608	12.3818	15.624	74.855	87.572	86.761	1353.12	1.12092	C30 H48 O3	3Î²-Hydroxy-olean-12-en-29-oic acid	at 293 K	None	553-555 K	colorless	None	None	chloroform	None	G.D.F.Silva, L.P.Duarte, S.A.V.Filho, A.C.Doriguetto, Y.P.Mascarenhas, J.Ellena, E.E.Castellano, A.B.Cota
DACZAL	CHIRAL	Enantiopure	NO	NO	P1	1	TRUE	FALSE	3	2	1	2	C	2	2	0	2	0	(2, S)	1	2	chiral	C1	2	2	2	Wa-could be Diast	contains following chiral atom(s)C	NA	NA	8.7126	10.8944	14.0607	107.549	94.993	93.599	1262.1	1.9631	C26 H18 Br4 O6	(S,Z)-4-(3,5-dibromo-4-methoxyphenyl)-3-((3,5-dibromo-4-methoxyphenyl)(hydroxy)methyl)-5-(4-methoxybenzylidene)furan-2(5H)-one	223 K	None	None	yellow	None	None	methanol	None	Weihong Wang, Hiyoung Kim, R.S.Patil, A.G.Giri, Dong Hwan Won, Dongyup Hahn, Youjung Sung, Jusung Lee, Hyukjae Choi, Sang-Jip Nam, Heonjoong Kang
DADROT	CHIRAL	Enantiopure	NO	NO	P1	1	TRUE	FALSE	3	1	1	1	S	0	0	1	0	0	(1, R)	1	1	chiral	C1	1	1	1	W2_enantiopure AU	contains following chiral atom(s)S	NA	NA	6.2313	8.2793	8.8044	117.174	100.944	93.245	391.365	1.27037	C14 H23 N2 O3 S1	t-butyl (R)-(dimethylamino)(4-methylphenyl)oxo-sulfanylcarbamate	173 K	None	None	colorless	None	None	None	None	S.Greed, E.L.Briggs, F.I.M.Idiris, A.J.P.White, Ulrich Lucking, J.A.Bull
DADSUA	CHIRAL	Enantiopure	NO	NO	P1	1	TRUE	FALSE	2.78	1	1	3	C	3	2	1	2	0	(1, SRS)	1	1	chiral	C1	1	1	1	W1_enantiopure AU	contains following chiral atom(s)C	NA	NA	5.7805	8.3929	8.728	62.505	76.037	72.631	355.798	1.52288	C17 H14 N2 O5	5-methyl-4a,5,6a,7-tetrahydro-11H-1,3dioxolo4,5-gindolo3,3a-cisoquinoline-3,6,8(4H)-trione	93 K	None	None	whiteish colorless	None	None	None	None	H.Takeuchi, S.Inuki, K.Nakagawa, T.Kawabe, A.Ichimura, Shinya Oishi, H.Ohno
DADTIP	CHIRAL	Enantiopure	NO	NO	P1	1	TRUE	FALSE	3.2	1	1	1	C	1	0	0	1	0	(1, S)	1	1	chiral	C1	1	1	1	W2_enantiopure AU	contains following chiral atom(s)C	NA	NA	6.4306	9.1945	10.2884	93.788	100.897	103.584	576.733	1.20867	C23 H35 B1 Cl1 N1 O3	9-(4-chlorophenethyl)-2,2,3,3,9-pentamethyl-7-(piperidin-1-ium-1-ylidene)-1,4,6-trioxa-5-boraspiro4.4nonan-5-uide	173 K	None	None	colorless	None	None	None	None	Taotao Gao
DAGXUH	RACEMATE	Strict definition of kryptoracemate	KRYPTORACEMIC	NO	P1	1	TRUE	FALSE	3.03	2	1	2	C	2	2	1	1	0	(1, S), (1, R)	2	2	racemic	C1	2	2	2	RAC-1	contains following chiral atom(s)C	NA	NA	7.5076	7.9269	13.2339	94.761	94.576	98.12	773.64	1.49912	C17 H17 Br1 O3	ethyl 5-acetyl-4-(4-bromophenyl)-2-methylcyclopenta-1,3-diene-1-carboxylate	150 K	None	None	colorless	None	None	None	None	Mei-Huey Lin, Yu-Chun Chen, Shih-Hao Chiu, Kung-Yu Liang, Yi-Lin Lee, Tsung-Hsun Chuang
DAHGAY	CHIRAL	Enantiopure	NO	NO	P1	1	TRUE	FALSE	3.77	2	1	4	C	4	4	2	2	0	(2, RS)	1	2	chiral	C1	2	2	2	Wa-could be Diast	contains following chiral atom(s)C	NA	NA	7.4734	10.0197	11.3183	114.253	92.117	101.509	750.454	1.59382	C14 H12 Br1 F2 N1 O3	3-2-(4-bromo-2-nitrophenyl)ethenyl-4-ethenyl-2,2-difluorooxolane	293 K	None	None	colorless	None	None	None	None	Jun Liu, Longhui Yu, Changwu Zheng, Gang Zhao
DAJHOL	CHIRAL	Enantiopure	NO	NO	P1	1	TRUE	FALSE	3.51	2	1	4	B C	2	0	2	2	0	(2, SR)	1	2	chiral	C1	2	2	2	Wa-could be Diast	contains following chiral atom(s)B,C	NA	NA	9.277	9.4618	11.5611	94.507	100.444	104.487	958.037	1.28331	C20 H21 B1 F2 N2 O2	4-Allyl-3-(dimethylaminomethylidene)-2-fluoro-2-(2-fluorophenyl)-4-phenyl-1,3,2-oxazaborolidin-5-one	at 133 K	None	None	colorless	None	None	None	None	E.Vedejs, S.C.Fields, R.Hayashi, S.R.Hitchcock, D.R.Powell, M.R.Schrimpf
DAKBIC	ACHIRAL	+ achiral molecule	NO	NO	P1	1	TRUE	FALSE	4.85	0	0	0	No Chiral atom	0	0	0	0	0						2	2	2	NA	contains following chiral atom(s)No Chiral atom	NA	NA	10.6752	12.6029	18.4402	91.644	97.18	114.573	2229.57	1.20683	C55 H52 K1 N1 O1 Si1	(N-(triphenylsilyl)-2,6-bis(diphenylmethyl)-4-methylanilido)-(diethyl ether)-potassium	at 123 K	None	None	colorless	None	None	None	None	Jiaye Li, A.Stasch, C.Schenk, C.Jones
DAMLOV	CHIRAL	Enantiopure	NO	NO	P1	1	TRUE	FALSE	3.15	2	1	6	C	6	6	4	2	0	(2, SRR)	1	2	chiral	C1	2	2	2	Wa-could be Diast	contains following chiral atom(s)C	NA	NA	7.626	9.9271	9.9899	95.28	96.864	91.255	747.255	1.51702	C14 H15 N1 O7 S1	methyl 8-(2-methoxy-2-oxoethyl)-3a,8-dihydro-3H-1,2,3oxathiazolo4,3-aisoindole-3-carboxylate 1,1-dioxide	100 K	None	None	silver	None	None	None	None	R.Achary, S.-M.Son, Jung, In A, Hyeon Kyu Lee
DAMWOH	CHIRAL	Enantiopure	NO	NO	P1	1	TRUE	FALSE	4.61	2	1	2	C	2	2	0	2	0	(2, S)	1	2	chiral	C1	2	2	2	Wa-could be Diast	contains following chiral atom(s)C	NA	NA	4.9016	15.7458	15.9585	113.002	90.264	94.714	1129	1.33403	C29 H24 F1 N1 O3	4-fluoro-N-4-(pyren-1-yl)butanoylphenylalanine	173 K	None	None	colorless	None	None	None	None	yunying Xu
DARXIE	CHIRAL	Enantiopure	NO	NO	P1	1	TRUE	FALSE	4.76	1	1	7	C	7	5	3	4	0	(1, SRSSRRS)	1	1	chiral	C1	1	1	1	W1_enantiopure AU	contains following chiral atom(s)C	NA	NA	6.4851	9.8871	10.5663	100.153	97.752	106.194	628.173	1.32034	C25 H37 Br1 O5	(2R,4R,4aS,6S,8aS)-2-(Benzyloxymethyl)-6-((2S,5R)-5-bromo-2,6,6-trimethyl-tetrahydropyran-2-yl)-8a-methyl-octahydropyrano(3,2-b)pyran-4-ol	at 293 K	None	420-422 K	colorless	None	None	None	None	G.A.Nishiguchi, R.D.Little
DATGEN	CHIRAL	Enantiopure	NO	NO	P1	1	TRUE	FALSE	4.66	2	1	8	C	8	4	4	4	0	(2, RSSR)	1	2	chiral	C1	2	2	2	Wa-could be Diast	contains following chiral atom(s)C	NA	NA	7.3394	12.4108	14.7998	107.312	100.068	91.14	1263.48	1.45233	C28 H28 N2 O10	11-(4-nitrobenzoyl)oxyspiro1,3-dioxolane-2,3-tricyclo4.3.3.01,6dodecan-7-yl 4-nitrobenzoate	100 K	None	None	colorless	None	None	None	None	L.M.Schneider, V.M.Schmiedel, T.Pecchioli, D.Lentz, C.Merten, M.Christmann
DAXJES	CHIRAL	Enantiopure	NO	NO	P1	1	TRUE	FALSE	4.12	1	1	4	C	4	3	3	1	0	(1, SRRR)	1	1	chiral	C1	1	1	1	W1_enantiopure AU	contains following chiral atom(s)C	NA	NA	5.8815	8.0521	10.4906	67.714	84.247	78.551	450.389	1.29191	C19 H26 O6	1,2:4,5-Di-O-(1-methylethylidene)-3-O-(phenylmethyl)-Î²-D-psicopyranose	at 100 K	None	88deg.C	colorless	None	None	None	None	I.Izquierdo, M.T.Plaza, M.Rodriguez, F.Franco, A.Martos
DAXROM	CHIRAL	Enantiopure	NO	NO	P1	1	TRUE	FALSE	2.08	2	1	8	C	8	8	4	4	0	(2, RRSS)	1	2	chiral	C1	2	2	2	Wa-could be Diast	contains following chiral atom(s)C	NA	NA	5.7387	8.161	8.6702	100.226	98.383	96.246	391.536	1.62183	C6 H9 N1 O4 S1	6-hydroxy-5-(hydroxymethyl)tetrahydrofuro2,3-d1,3oxazole-2(3H)-thione	100 K	None	None	colorless	None	None	None	None	S.Stairs, A.Nikmal, D.-K.Bucar, Shao-Liang Zheng, J.W.Szostak, M.W.Powner
DCHPHA01	ACHIRAL	+ achiral molecule	NO	NO	P1	1	TRUE	FALSE	3.38	0	0	0	No Chiral atom	0	0	0	0	0						2	2	2	NA	contains following chiral atom(s)No Chiral atom	NA	NA	6.5796	9.5197	10.9205	84.538	79.942	78.804	659.354	1.1599	C12 H23 O2 P1	dicyclohexylphosphinic acid	293 K	None	None	colorless	None	None	None	None	E.Veerashekhar Goud, D.Das, A.Sivaramakrishna, K.Vijayakrishna, V.Sabareesh, G.Gopakumar, C.V.S.Brahmmananda Rao, Mohsin Y.Lone, P.C.Jha
DEBMIJ	CHIRAL	Enantiopure	NO	NO	P1	1	TRUE	FALSE	4.14	2	1	2	C	2	2	0	2	0	(2, S)	1	2	chiral	C1	2	2	2	Wa-could be Diast	contains following chiral atom(s)C	NA	NA	7.8451	8.3042	11.06	76.583	88.533	75.925	679.459	1.3409	C15 H14 O3 S1	4-(4-methylphenyl)-3,4-dihydro-2H-1,2Î»6-benzoxathiine-2,2-dione	173 K	None	None	colorless	None	None	None	None	Jingzhao Xia, Yu Nie, Guoqiang Yang, Yangang Liu, Wanbin Zhang
DEDVIV	CHIRAL	Enantiopure + achiral molecule	NO	NO	P1	1	TRUE	FALSE	4.23	1	1	2	C	2	2	2	0	0	(1, RR)	1	1	chiral	C2	2	1	1	W1_enantiopure AU	contains following chiral atom(s)C	NA	NA	8.1517	9.8857	10.2202	78.725	69.83	66.297	706.319	1.2664	C28 H26 O4,C7 H12 O1	(+)-(2R,3R)-1,1,4,4-tetraphenylbutane-1,2,3,4-tetrol cycloheptanone	200 K	None	420.15 K	colorless	None	None	cycloheptanone	None	B.Barton, M.R.Caira, M.-A.Adam, E.C.Hosten
DEFJUX	CHIRAL	Enantiopure	NO	NO	P1	1	TRUE	FALSE	4.31	2	1	4	C	4	4	0	4	0	(2, SS)	1	2	chiral	C1	2	2	2	Wa-could be Diast	contains following chiral atom(s)C	NA	NA	8.9	8.958	10.397	92.153	96.035	94.714	820.638	1.20752	C15 H26 N2 O4	methyl 1-isobutyrylprolylvalinate	100 K	None	None	None	None	None	n-hexane	None	S.K.Gupta, S.Banerjee, E.N.Prabhakaran
DEFLOQ	CHIRAL	Enantiopure	NO	NO	P1	1	TRUE	FALSE	3.64	1	1	1	C	1	0	1	0	0	(1, R)	1	1	chiral	C1	1	1	1	W2_enantiopure AU	contains following chiral atom(s)C	NA	NA	6.6174	8.2372	8.3921	87.212	85.282	72.838	435.452	1.24865	C19 H21 N1 O2 S1	(2R,(S)S)-2-Hydroxy-3-methyl-2-(2-(p-tolylsulfinyl)phenyl)butanenitrile	at 296 K	None	403-404 K	colorless	None	None	ethyl acetate/hexane	None	J.L.G.Ruano, M.A.Fernandez-Ibanez, M.C.Maestro, M.M.Rodriguez-Fernandez
DEJXAT	CHIRAL	Enantiopure	NO	NO	P1	1	TRUE	FALSE	4.17	2	1	10	C	10	10	2	8	0	(2, SSSRS)	1	2	chiral	C1	2	2	2	Wa-could be Diast	contains following chiral atom(s)C	NA	NA	7.632	11.063	11.876	83.72	86.92	74.55	960.373	1.32583	C20 H21 N3 O5	Ethyl (3,5-dioxo-4-phenyl-9-vinyl-2,4,6-triazatricyclo5.2.2.02,6undec-10-en-8-yl)(hydroxy)acetate	at 213 K	None	408-411 K	None	None	None	None	None	R.Beniazza, V.Desvergnes, E.Girard, B.Kauffmann, M.Berlande, Y.Landais
DEQJIS	CHIRAL	Enantiopure	NO	NO	P1	1	TRUE	FALSE	3.7	1	1	1	C	1	1	0	1	0	(1, S)	1	1	chiral	C1	1	1	1	W2_enantiopure AU	contains following chiral atom(s)C	NA	NA	5.906	9.059	9.685	77.85	73.69	78.74	481.032	1.16069	C20 H25 B1 N2 O2	DiphenylN-isopropylidene-L-ornithinato-O,Nboron	None	None	523-525 K	colorless	None	None	None	None	J.Trujillo, H.Hopfl, D.Castillo, R.Santillan, N.Farfan
DEQLET	ACHIRAL	+ achiral molecule	NO	NO	P1	1	TRUE	FALSE	3.31	0	0	0	No Chiral atom	0	0	0	0	0						1	1	1	NA	contains following chiral atom(s)No Chiral atom	NA	NA	6.2047	7.9402	8.6482	106.585	94.449	101.754	395.575	1.24406	C22 H16 O1	5-methyl-2,3-diphenyl-1H-inden-1-one	296.1 K	None	None	reddish pink	None	None	None	None	B.Banerji, L.Majumder, S.Adhikary
DERCIM	CHIRAL	Enantiopure	NO	NO	P1	1	TRUE	FALSE	3.1	1	1	2	C	2	2	0	2	0	(1, SS)	1	1	chiral	C1	1	1	1	W1_enantiopure AU	contains following chiral atom(s)C	NA	NA	5.715	7.736	11.45	86.53	82.39	84.96	499.207	1.24892	C20 H29 N3 O4	t-Butylcarbonyl-L-prolyl-L-tyrosyl-methylamine	None	None	None	None	None	None	None	None	A.Aubry, M.T.Cung, M.Marraud
DERGAL	ACHIRAL	+ achiral molecule	NO	NO	P1	1	TRUE	FALSE	3.43	0	0	0	No Chiral atom	0	0	0	0	0						1	1	1	NA	contains following chiral atom(s)No Chiral atom	NA	NA	6.4079	7.7817	11.0637	86.754	85.19	83.495	545.583	1.64404	C25 H11 B1 F10 N2	1-bis(pentafluorophenyl)boranyl-2-(diphenylmethylidene)hydrazine	150 K	None	None	colorless	None	None	None	None	Connie Tang, Quiming Liang, A.R.Jupp, T.C.Johnstone, R.C.Ne, Datong Song, S.Grimme, D.W.Stephan
DESMOD	CHIRAL	Enantiopure	NO	NO	P1	1	TRUE	FALSE	2.68	2	1	4	C	4	4	2	2	0	(2, SR)	1	2	chiral	C1	2	2	2	Wa-could be Diast	contains following chiral atom(s)C	NA	NA	9.589	11.576	11.326	118.8	93.23	111.44	982.948	1.48425	C20 H23 Br1 O6	6-Bromo-3,3,4,5,7-penta-O-methylcatechin	None	None	None	colorless	None	None	None	None	F.W.B.Einstein, E.Kiehlmann, E.K.Wolowidnyk
DETWIM	CHIRAL	Enantiopure	NO	NO	P1	1	TRUE	FALSE	4.69	2	1	10	C	10	6	4	6	0	(2, SSRSR)	1	2	chiral	C1	2	2	2	Wa-could be Diast	contains following chiral atom(s)C	NA	NA	6.0177	12.9026	13.0816	117.122	90.99	92.129	902.725	1.23042	C20 H30 O4	5-hydroxy-2-(2-hydroxybut-3-en-2-yl)-7,7,10a-trimethyl-1,2,5,6,6a,7,8,9,10,10a-decahydro-4H-naphtho2,1-cpyran-4-one	170 K	None	None	colorless	None	None	None	None	Jing-Jing Qi, Jun-Su Zhou, Yan Zhang, Yao-Yue Fan, Bin Zhou, Hong-Chun Liu, Jin-Xin Zhao, Jian-Min Yue
DEYSEH	ACHIRAL	+ achiral molecule	NO	NO	P1	1	TRUE	FALSE	4.42	0	0	0	No Chiral atom	0	0	0	0	0						2	2	2	NA	contains following chiral atom(s)No Chiral atom	NA	NA	5.416	16.0287	18.689	115.342	91.826	94.608	1457.59	1.15453	C36 H42 O2	5,5-bis(2-(4-Hexylphenyl)vinyl)-2,2-bifuran	at 100 K	None	None	yellow	None	None	None	None	O.Gidron, Afshin Dadvand, Emily Wei-Hsin Sun, Insik Chung, L.J.W.Shimon, M.Bendikov, D.F.Perepichka
DEZLAY	CHIRAL	Contains at least 2 different chemicals in enantiopure proportions	NO	NO	P1	1	TRUE	FALSE	3.89	2	2	3	C	3	3	2	1	0	(1, RR), (1, S)	1, 1	1, 1	chiral, chiral	C3	2	1	1	W1_enantiopure AU	contains following chiral atom(s)C	NA	NA	5.0193	8.6051	10.2069	69.005	77.721	89.513	401.06	1.39258	C6 H12 N2 O4,C6 H12 N2 O3	(2R,3R)-(+)-2,3-dihydroxy-N,N-dimethylbutanediamide (2S)-(-)-2-hydroxy-N,N-dimethylbutanediamide	100 K	None	None	colorless	None	None	None	None	E.N.Pinter, L.S.Cantrell, G.M.Day, K.A.Wheeler
DEZMAZ	CHIRAL	Contains at least 2 different chemicals in enantiopure proportions	NO	NO	P1	1	TRUE	FALSE	4.53	2	2	3	C	3	3	2	1	0	(1, S), (1, RR)	1, 1	1, 1	chiral, chiral	C1	2	1	1	W1_enantiopure AU	contains following chiral atom(s)C	NA	NA	4.9064	8.7118	17.1527	102.543	96.249	90.472	711.033	1.17857	C12 H24 N2 O4,C12 H24 N2 O3	(2R,3R)-(+)-2,3-dihydroxy-N,N-dibutylbutanediamide (2S)-(-)-2-hydroxy-N,N-dibutylbutanediamide	100 K	None	None	colorless	None	None	None	None	E.N.Pinter, L.S.Cantrell, G.M.Day, K.A.Wheeler
DICBOI	CHIRAL	Enantiopure	NO	NO	P1	1	TRUE	FALSE	2.98	1	1	2	C	2	2	1	1	0	(1, RS)	1	1	chiral	C1	1	1	1	W1_enantiopure AU	contains following chiral atom(s)C	NA	NA	5.54059	10.0757	10.3999	97.848	100.309	90.16	565.635	1.27263	C25 H27 N3 O4	t-Butyl (2-(5-nitropyridin-2-yl)-1,3-diphenylpropyl)carbamate	at 120 K	None	None	colorless	None	None	None	None	D.Best, S.Kujawa, Hon Wai Lam
DIGOXN10	CHIRAL	Enantiopure	NO	NO	P1	1	TRUE	FALSE	4.2	1	1	21	C	21	18	8	13	0	(1, RSSSSSSRSSRRSSRRSRSRS)	1	1	chiral	C1	1	1	1	W1_enantiopure AU	contains following chiral atom(s)C	NA	NA	7.404	12.781	12.677	91.15	119.89	104.78	990.023	1.30984	C41 H64 O14	Digoxin	None	None	None	None	None	None	None	No study temperature is reported.	K.Go, G.Kartha, J.P.Chen
DIKSEW	CHIRAL	Enantiopure	NO	NO	P1	1	TRUE	FALSE	3.05	1	1	4	C	4	3	3	1	0	(1, RRSR)	1	1	chiral	C1	1	1	1	W1_enantiopure AU	contains following chiral atom(s)C	NA	NA	5.2767	5.5375	10.2809	104.598	90.393	104.834	280.199	1.47719	C10 H19 N1 O6	1-Deoxy-1-morpholino-D-fructopyranose	at 120 K	None	420 K	colorless	None	None	methanol	None	R.Rodriguez, J.Cobo, M.Nogueras, J.N.Low, C.Glidewell
DIKWIE	CHIRAL	Enantiopure	NO	NO	P1	1	TRUE	FALSE	2.66	1	1	3	C	3	3	2	1	0	(1, RSR)	1	1	chiral	C1	1	1	1	W1_enantiopure AU	contains following chiral atom(s)C	NA	NA	5.2347	7.1855	8.9972	110.756	96.827	99.511	306.275	1.62809	C10 H12 N4 O5 S1	5-Amino-3-(2-deoxy-Î²-D-erythro-pentofuranosyl)thiazolo(4,5-d)pyrimidine-2,7(3H,6H)-dione	at 293 K	None	451 K(dec.)	colorless	None	None	ethanol	None	F.Seela, Xin Ming, S.Budow, H.Eickmeier, H.Reuter
DISHIX	ACHIRAL	+ achiral molecule	NO	NO	P1	1	TRUE	FALSE	3.51	0	0	0	No Chiral atom	0	0	0	0	0						1	1	1	NA	contains following chiral atom(s)No Chiral atom	NA	NA	10.376	8.884	4.378	83.046	84.413	71.181	378.451	1.31784	C18 H20 O4	2,4,13,15-Tetraoxa(5.5)metacyclophane	at 293 K	None	387-388 K	colorless	None	None	dichloromethane/heptane/acetone	None	R.Cacciapaglia, S.Di Stefano, L.Mandolini, P.Mencarelli, F.Ugozzoli
DISHOD	ACHIRAL	+ achiral molecule	NO	NO	P1	1	TRUE	FALSE	4.85	0	0	0	No Chiral atom	0	0	0	0	0						1	1	1	NA	contains following chiral atom(s)No Chiral atom	NA	NA	8.32	8.445	7.603	118.167	66.439	124.566	381.352	1.30782	C18 H20 O4	2,4,13,15-Tetraoxa(5.5)paracyclophane	at 293 K	None	None	colorless	None	None	dichloromethane/heptane/acetone	None	R.Cacciapaglia, S.Di Stefano, L.Mandolini, P.Mencarelli, F.Ugozzoli
DISQOO	CHIRAL	Enantiopure	NO	NO	P1	1	TRUE	FALSE	3.43	2	1	2	C	2	2	0	2	0	(2, S)	1	2	chiral	C1	2	2	2	Wa-could be Diast	contains following chiral atom(s)C	NA	NA	6.8827	9.3276	13.2697	88.568	88.194	75.584	824.54	1.48948	C19 H16 Cl1 N3 O3	(S)-2-(4-Chlorobenzoyl)-1,2,3,4-tetrahydrobenzoepyrazino1,2-a1,4diazepine-6,12(11H,12aH)-dione	100 K	None	None	colorless	None	None	None	None	A.Mieczkowski, D.Trzybinski, M.Wilczek, M.Psurski, M.Baginski, B.Bieszczad, M.Mroczkowska, K.Wozniak
DISXIP	CHIRAL	Enantiopure	NO	NO	P1	1	TRUE	FALSE	4.64	4	1	32	C	32	24	16	16	0	(4, SSSRRRSR)	1	4	chiral	C1	4	4	4	Wa-could be Diast	contains following chiral atom(s)C	NA	NA	9.5297	12.383	25.595	81.641	89.2	88.955	2987.59	1.12446	C34 H51 N1 O2	(5S,8S,9S,10R,13R,14S,17R)-3-((4-methoxyphenyl)amino)-10,13-dimethyl-17-((R)-6-methylheptan-2-yl)-1,5,6,7,8,9,10,11,12,13,14,15,16,17-tetradecahydro-2H-cyclopentaaphenanthren-2-one	100 K	None	None	colorless	None	None	None	None	Xiaoming Jie, Yaping Shang, Zhe-Ning Chen, Xiaofeng Zhang, Wei Zhuang, Weiping Su
DIXXEO	ACHIRAL	+ achiral molecule	NO	NO	P1	1	TRUE	FALSE	4.18	0	0	0	No Chiral atom	0	0	0	0	0						3	1	1	NA	contains following chiral atom(s)No Chiral atom	NA	NA	10.6814	11.1396	11.4818	103.635	93.4413	110.096	1231.87	1.671	C43 H26 I3 N5,2(C6 H5 N1 O2)	5-(4-Pyridyl)-10,15,20-tris(4-iodophenyl)porphyrin nitrobenzene solvate	at 110 K	None	None	red	None	None	nitrobenzene	None	S.Muniappan, S.Lipstman, I.Goldberg
DIXYUE01	ACHIRAL	+ achiral molecule	NO	NO	P1	1	TRUE	FALSE	3.93	0	0	0	No Chiral atom	0	0	0	0	0						1	1	1	NA	contains following chiral atom(s)No Chiral atom	NA	NA	6.504	7.594	14.599	92.799	99.319	111.066	659.492	1.28807	C27 H33 N3 O7	12,15,18,21,24,27,30-heptaoxa-35,36,37-triazatetracyclo29.3.1.12,6.17,11heptatriaconta-1(35),2(37),3,5,7(36),8,10,31,33-nonaene	296 K	None	None	colorless	None	None	None	None	F.R.Fronczek
DIYGIC	CHIRAL	Enantiopure	NO	NO	P1	1	TRUE	FALSE	3.74	1	1	2	C	2	2	0	2	0	(1, SS)	1	1	chiral	C1	1	1	1	W1_enantiopure AU	contains following chiral atom(s)C	NA	NA	9.6643	12.7047	13.2562	66.297	87.254	74.928	1436.1	1.13226	C62 H82 N2 P4	1,9-(S,S)-bis(Î±-Methylbenzyl)-3,7,11,15-tetramesityl-1,9-diaza-3,7,11,15-tetraphosphacyclohexadecane	at 213 K	None	421-423 K	colorless	None	None	DMF	None	R.N.Naumov, A.A.Karasik, K.B.Kanunnikov, A.V.Kozlov, S.K.Latypov, K.V.Domasevitch, E.Hey-Hawkins, O.G.Sinyashin
DIZGEY	CHIRAL	Enantiopure	NO	NO	P1	1	TRUE	FALSE	5	2	1	10	C	10	10	6	4	0	(2, SRRSR)	1	2	chiral	C1	2	2	2	Wa-could be Diast	contains following chiral atom(s)C	NA	NA	10.465	11.061	9.48	100.58	105.43	84.41	1038.44	1.34114	C22 H27 Br1 O3	8-p-Bromobenzoato-10,11-dihydro-Î³-cadinen-3-one	None	None	413 K	None	None	None	None	None	V.S.Shukla, N.C.Barua, P.K.Chowdhury, R.P.Sharma, M.Bordoloi, U.Rychlewska
DIZXES	CHIRAL	Enantiopure	NO	NO	P1	1	TRUE	FALSE	4.83	2	1	2	C	2	0	2	0	0	(2, R)	1	2	chiral	C1	2	2	2	Wa-could be Diast	contains following chiral atom(s)C	NA	NA	6.608	10.981	11.559	87.019	89.941	83.426	832.097	1.3585	C19 H20 N2 O4	3-(6-hydroxy-2,4,6-trimethyl-7-oxo-6,7-dihydrospirocyclopropane-1,5-inden-3-yl)methylpyrimidine-2,4(1H,3H)-dione	100.2 K	None	None	yellow	None	None	None	None	A.L.Rheingold
DMTCUN10	ACHIRAL	+ achiral molecule	NO	NO	P1	1	TRUE	FALSE	4.8	0	0	0	No Chiral atom	0	0	0	0	0						2	2	2	NA	contains following chiral atom(s)No Chiral atom	NA	NA	8.089	7.007	9.886	100.47	95.91	115.46	487.037	1.16092	C13 H14	11,11-Dimethyl-tricyclo(4.4.1.01,6)undeca-2,4,7,9-tetraene	None	None	88deg.C	None	None	None	None	None	R.Bianchi, G.Morosi, A.Mugnoli, M.Simonetta
DOCKUB	MESO		NO	NO	P1	1	TRUE	FALSE	4.78	1	1	4	C	4	4	2	2	0	(1, SSRR)	1	1	MESO	Ci	1	1	1	Condition 2	contains following chiral atom(s)C	NA	NA	8.53	9.586	8.162	98.56	100.78	77.86	636.775	1.25841	C30 H30 N2 O4	13,14-Dibenzyl-3,9-bis(methoxycarbonyl)-13,14-diazatricyclo(6.4.1.12,7)tetradeca-3,5,9,11-tetraene	None	None	456-457 K	colorless	None	None	hexane/2-propanol	None	M.Noguchi, H.Yamada, S.Takamura, K.Okada, A.Kakehi, H.Yamamoto
DODPER	CHIRAL	Enantiopure	NO	NO	P1	1	TRUE	FALSE	3.1	2	1	6	C	6	6	4	2	0	(2, SRR)	1	2	chiral	C1	2	2	2	Wa-could be Diast	contains following chiral atom(s)C	NA	NA	9.246	9.898	12.749	129.56	98.75	95.13	862.064	1.48037	C17 H22 Br1 N1 O4	(-)-(3S,4aR,10aR)-9-Bromo-1,2,3,4,4a,5,10,10a-octahydro-1,6-dimethoxy-3-(methoxycarbonyl)-benzo(g)quinoline	None	None	402-403 K	colorless	None	None	None	None	R.Nordmann, A.Widmer
DOFVAX	ACHIRAL	+ achiral molecule	NO	NO	P1	1	TRUE	FALSE	2.54	0	0	0	No Chiral atom	0	0	0	0	0						2	2	2	NA	contains following chiral atom(s)No Chiral atom	NA	NA	9.4525	9.9174	11.0529	76.636	74.816	82.599	970.32	1.33294	C27 H19 N1 O2	1-(2-(2,3-Dihydro-1,4-benzodioxin-6-yl)-1-naphthyl)isoquinoline	at 100 K	None	None	colorless	None	None	None	None	Abel Ros, B.Estepa, P.Ramirez-Lopez, E.Alvarez, R.Fernandez, J.M.Lassaletta
DOGBAD	CHIRAL	Enantiopure + achiral molecule	NO	NO	P1	1	TRUE	FALSE	4.26	1	1	3	C	3	3	2	1	0	(1, RRS)	1	1	chiral	C1	2	1	1	W1_enantiopure AU	contains following chiral atom(s)C	NA	NA	7.2034	8.1459	9.9024	82.842	75.276	89.121	557.513	1.38175	C18 H18 Cl1 N3 O4,C4 H8 O2	9-Chloro-10,12-dihydroxy-15-methyl-1a,15,16,16a-tetrahydro-1H-7,4-(metheno)cyclopropah12,2,3,4benzoxatriazacyclopentadecin-13(8H)-one ethyl acetate solvate	at 125 K	None	513-515 K	colorless	None	None	chloroform/ethanol	None	Xiaoguang Lei, S.J.Danishefsky
DOHHIR	CHIRAL	Enantiopure	NO	NO	P1	1	TRUE	FALSE	3.4	1	1	3	C	3	3	3	0	0	(1, RRR)	1	1	chiral	C1	1	1	1	W1_enantiopure AU	contains following chiral atom(s)C	NA	NA	4.825	5.452	16.1	87.08	93.1	96.1	420.075	1.20727	C15 H31 N1 O5	N-Decyl-D-ribonamide	None	None	None	None	None	None	None	None	B.Tinant, J.P.Declercq, M.Van Meerssche
DOHXUW	CHIRAL	Enantiopure	NO	NO	P1	1	TRUE	FALSE	4.8	2	1	4	C	4	4	4	0	0	(2, RR)	1	2	chiral	C1	2	2	2	Wa-could be Diast	contains following chiral atom(s)C	NA	NA	9.9117	11.4134	14.938	76.536	76.796	67.53	1500.28	1.38034	C30 H31 Br1 N4 O4 S1	4-bromo-N-2-({2-1-(4-methylbenzene-1-sulfonyl)-1H-indol-3-ylethyl}carbamoyl)cyclohexylpyridine-2-carboxamide	297 K	None	None	colorless	None	None	None	None	Xiangqiang Li
DORHOK	CHIRAL	Enantiopure + achiral molecule	NO	NO	P1	1	TRUE	FALSE	4.86	2	1	2	C	2	2	0	2	0	(2, S)	1	2	chiral	C1	4	2	2	Wa-could be Diast	contains following chiral atom(s)C	NA	NA	8.1676	11.9112	12.7014	89.4745	81.236	75.9211	1184.05	1.24406	C22 H19 N5 O1,C4 H10 O1	4-2-(6-methylpyridin-2-yl)-5,6-dihydro-4H-pyrrolo1,2-bpyrazol-3-ylquinoline-6-carboxamide butan-2-ol solvate	100 K	None	None	colorless	None	None	None	None	R.M.Bhardwaj, J.A.McMahon, J.Nyman, L.S.Price, S.Konar, I.D.H.Oswald, C.R.Pulham, S.L.Price, S.M.Reutzel-Edens
DORKAX	CHIRAL	Enantiopure	NO	NO	P1	1	TRUE	FALSE	4.89	1	1	4	C	4	4	2	2	0	(1, RSRS)	1	1	chiral	C1	1	1	1	W1_enantiopure AU	contains following chiral atom(s)C	NA	NA	4.6531	7.2128	10.1556	94.279	95.127	90.241	338.511	1.37507	C15 H20 O5	(+)-Varitriol	at 100 K	None	382-385 K	colorless	None	None	ethyl acetate/hexanes	The authors state the crystal analysed had a small twin component, however no twin data reduction procedure was required in the refinement.	M.Palik, O.Karlubikova, A.Lasikova, J.Kozisek, T.Gracza
DOVHEE	CHIRAL	Enantiopure + achiral molecule	NO	NO	P1	1	TRUE	FALSE	2.84	2	1	10	C	10	10	8	2	0	(2, RRRSR)	1	2	chiral	C1	3	2	2	Wa-could be Diast	contains following chiral atom(s)C	NA	NA	10.98	11.6398	12.3033	71.893	81.479	71.689	1416.65	1.28495	C31 H33 N3 O6,0.25(H2 O1)	3-6-(2,2-dimethyl-1,3-dioxolan-4-yl)-2,2-dimethyltetrahydro-2H-furo3,4-d1,3dioxol-4-yl-1-methyl-N-(quinolin-8-yl)-1H-indole-2-carboxamide hydrate	293 K	None	None	colorless	None	None	None	None	Quanquan Wang, Shuang An, Zhiqiang Deng, Wanjun Zhu, Zeyi Huang, Gang He, Gong Chen
DOVPOW	CHIRAL	Enantiopure	NO	NO	P1	1	TRUE	FALSE	3.77	2	1	4	C	4	4	2	2	0	(2, RS)	1	2	chiral	C1	2	2	2	Wa-could be Diast	contains following chiral atom(s)C	NA	NA	9.1657	9.6499	10.1439	76.926	87.414	61.696	767.443	1.64921	C16 H15 Br2 N1	(2S,3R)-6-bromo-2-(4-bromophenyl)-3-methyl-1,2,3,4-tetrahydroquinoline	293 K	None	86-88 deg.C	colorless	None	None	None	None	Xin-Hu Hu, Xiang-Ping Hu
DOVXIW	CHIRAL	Enantiopure + achiral molecule	NO	NO	P1	1	TRUE	FALSE	3.84	4	1	16	C	16	16	8	8	0	(4, RSRS)	1	4	chiral	C2	8	4	4	Wa-could be Diast	contains following chiral atom(s)C	NA	NA	11.6155	11.7743	20.9339	90.144	93.114	109.897	2687.46	1.15426	C22 H42 N6 O4,0.69(H2 O1)	4,7,11,14-Tetraisopropyl-1,8-dimethyl-1,3,5,8,10,12-hexaazacyclotetradecane-2,6,9,13-tetrone hydrate	at 105 K	None	None	colorless	None	None	acetonitrile/methanol	None	L.Fischer, M.Decossas, J.-P.Briand, C.Didierjean, G.Guichard
DOYVUL	CHIRAL	Enantiopure	NO	NO	P1	1	TRUE	FALSE	4.67	2	1	2	C	2	2	0	2	0	(2, S)	1	2	chiral	C1	2	2	2	Wa-could be Diast	contains following chiral atom(s)C	NA	NA	6.1358	11.0077	13.3588	91.54	100.013	91.645	887.693	1.32588	C21 H22 O5	6-(4,6-dimethylocta-2,4-dienoyl)-2,7-dihydroxy-3-methylnaphthalene-1,4-dione	100 K	None	None	colorless	None	None	None	None	Zhaoming Liu, Pei Qiu, Hongju Liu, Jing Li, Changlun Shao, Tao Yan, Wenhao Cao, Zhigang She
DOYWEW	CHIRAL	Enantiopure	NO	NO	P1	1	TRUE	FALSE	4.49	2	1	20	C	20	8	8	12	0	(2, SRSRSSRSSR)	1	2	chiral	C1	2	2	2	Wa-could be Diast	contains following chiral atom(s)C	NA	NA	8.3219	14.247	17.7771	86.322	89.438	82.265	2084.21	1.24117	C44 H58 O12	5,5-bis(acetyloxy)-3,3,5,5,8a,8a-hexamethyl-2,2-dioxo-4,4,4a,4a,5,5,6,6,7,7,8,8,8a,8a,9,9-hexadecahydro-2H,2H-9a,9a-binaphtho2,3-bfuran-6,6-diyl bis(2-methylbut-2-enoate)	100 K	None	None	colorless	None	None	None	None	Yi Shen, Hao Chen, Lei Shen, Hua-Xuan Li, Xiang Dong, Chao-Jiang Xiao, Bei Jiang
DOZMIO	CHIRAL	Enantiopure	NO	NO	P1	1	TRUE	FALSE	2.3	1	1	6	C	6	6	3	3	0	(1, RSRSSR)	1	1	chiral	C1	1	1	1	W1_enantiopure AU	contains following chiral atom(s)C	NA	NA	8.048	9.684	5.612	94.99	111.85	71.33	384.341	1.54376	C15 H19 N1 O9	2-O-Î²-D-Glucopyranosyl-7-methoxy-1,4(2H)-benzoxazin-3-one	None	None	523-524 K	colorless	None	None	None	alpha should be 94.99 not 99.18	T.Nagao, H.Otsuka, H.Kohda, T.Sato, K.Yamasaki
DUDPIB	CHIRAL	Enantiopure + achiral molecule	NO	NO	P1	1	TRUE	FALSE	2.44	1	1	4	N P	0	2	0	4	0	(1, SSSS)	1	1	chiral	C1	9	1	1	W1_enantiopure AU	contains following chiral atom(s)N,P	NA	NA	8.8361	10.1124	10.4054	81.002	73.665	66.116	814.871	1.29933	C20 H38 N4 O6 P2,8(H2 O1)	4-Benzyl-11-methyl-1,4,8,11-tetra-azacyclotetradecane-1,8-bis(methylenephosphonic acid) octahydrate	None	None	444-445 K	colorless	None	None	water/acetone	None	J.Kotek, P.Vojtisek, I.Cisarova, P.Hermann, P.Jurecka, J.Rohovec, I.Lukes
DUFFAO	ACHIRAL	+ achiral molecule	NO	NO	P1	1	TRUE	FALSE	3.24	0	0	0	No Chiral atom	4	20	0	0	24						2	2	2	NA	contains following chiral atom(s)No Chiral atom	NA	NA	11.0024	12.0926	12.605	72.7472	84.3512	67.734	1482	1.19823	C33 H30 B10	1-(spirofluorene-9,9-fluoren2yl)-2-phenyl-1,2-dicarba-closo-dodecaborane	296 K	None	None	None	None	None	None	None	S.Kim, Ji Hye Lee, Hyunhee So, Jiyeon Ryu, Junseong Lee, Hyonseok Hwang, Youngjo Kim, Myung Hwan Park, Kang Mun Lee
DUGCOA	ACHIRAL	+ achiral molecule	NO	NO	P1	1	TRUE	FALSE	2.7	0	0	0	No Chiral atom	0	0	0	0	0						1	1	1	NA	contains following chiral atom(s)No Chiral atom	NA	NA	4.8203	6.6432	12.2865	82.104	86.121	82.13	385.562	1.37963	C17 H20 O6	methyl 6-(4,6-dihydroxy-7-methyl-3-oxo-1,3-dihydro-2-benzofuran-5-yl)-4-methylhex-4-enoate	90 K	None	None	colorless	None	None	dichloromethane/diethyl ether	None	R.K.Belter, F.R.Fronczek
DUGVOQ	CHIRAL	Enantiopure + achiral molecule	NO	NO	P1	1	TRUE	FALSE	3.95	1	1	4	C	4	4	4	0	0	(1, RRRR)	1	1	chiral	C1	3	1	1	W1_enantiopure AU	contains following chiral atom(s)C	NA	NA	5.206	8.894	11.103	93.14	99.71	91.08	505.761	1.43948	C17 H18 N4 O6,2(C1 H4 O1)	7,8-Dimethyl-10-(Î²-D-ribopyranosyl)benzo(g)pteridine-2,4(3H,10H)-dione methanol solvate	None	None	460 K	yellow	None	None	None	None	A.Schwogler, V.Gramlich, T.Carell
DUHBEQ	CHIRAL	Enantiopure	NO	NO	P1	1	TRUE	FALSE	4.65	1	1	5	C	5	4	2	3	0	(1, SSRSR)	1	1	chiral	C1	1	1	1	W1_enantiopure AU	contains following chiral atom(s)C	NA	NA	7.4904	8.9503	9.9976	109.321	101.638	101.9	591.872	1.08454	C25 H38 O3	3,3,4a,5,5,7,7-heptamethyl-9-(2-methylpropyl)-3,4,4a,5,9,9a-hexahydro-1H-2,4-methanoxanthene-6,8(2H,7H)-dione	289 K	None	None	colorless	None	None	None	None	Xin Deng, Xiu-rong Wang, Lin Wu
DUHKEW	CHIRAL	Enantiopure + achiral molecule	NO	NO	P1	1	TRUE	FALSE	3.7	1	1	2	C	2	2	0	2	0	(1, SS)	1	1	chiral	C1	2	1	1	W1_enantiopure AU	contains following chiral atom(s)C	NA	NA	7.806	8.473	4.965	101.5	100.81	104.72	301.241	1.54472	C9 H14 N2 O7,H2 O1	Î±-L-Glutamyl-L-aspartic acid monohydrate	None	None	None	colorless	None	None	None	None	D.S.Eggleston, D.J.Hodgson
DUHSEH	CHIRAL	Enantiopure + achiral molecule	NO	NO	P1	1	TRUE	FALSE	3.93	2	1	2	C	2	2	0	2	0	(2, S)	1	2	chiral	C1	4	2	2	Wa-could be Diast	contains following chiral atom(s)C	NA	NA	9.6736	11.1735	15.11	71.19	71.605	78.783	1459.14	1.50118	C25 H26 N4 O8 S2,C1 H2 Cl2	1-5,5-bis(benzenesulfonyl)-3-methylhexylidene-2-(2,4-dinitrophenyl)hydrazine dichloromethane solvate	100 K	None	None	yellow	None	None	hexane / ethyl acetate	None	Dequan Zhang, Cai You, Xiuxiu Li, Jialin Wen, Xumu Zhang
DUJTEI	CHIRAL	Enantiopure	NO	NO	P1	1	TRUE	FALSE	2.78	1	1	2	C	2	2	1	1	0	(1, SR)	1	1	chiral	C1	1	1	1	W1_enantiopure AU	contains following chiral atom(s)C	NA	NA	6.0199	9.2592	11.0429	73.365	74.694	75.737	559.045	1.24009	C26 H27 N1 O4	(1R,3S)-Methyl 2-benzyl-6,7-dimethoxy-1-phenyl-1,2,3,4-tetrahydroisoquinoline-3-carboxylate	at 173 K	None	420 K	yellow	None	None	dichloromethane	None	T.Naicker, M.McKay, T.Govender, H.G.Kruger, G.E.M.Maguire
DUNDOH	ACHIRAL	+ achiral molecule	NO	NO	P1	1	TRUE	FALSE	4.42	0	0	0	No Chiral atom	0	0	0	0	0						5	2	2	NA	contains following chiral atom(s)No Chiral atom	NA	NA	5.927	8.342	13.899	79.829	84.029	77.411	658.609	1.53929	C7 H6 O5,0.5(C4 H8 O1),C4 H5 N1 O2	3,4,5-trihydroxybenzoic acid pyrrolidine-2,5-dione tetrahydrofuran solvate	110 K	None	None	colorless	None	None	None	None	R.Kaur, S.Cherukuvada, P.B.Managutti, T.N.G.Row
DUNHAW	CHIRAL	Enantiopure	NO	NO	P1	1	TRUE	FALSE	3.87	2	1	2	C	2	2	2	0	0	(2, R)	1	2	chiral	C1	2	2	2	Wa-could be Diast	contains following chiral atom(s)C	NA	NA	6.8281	7.7624	11.8748	71.733	79.051	73.488	569.502	1.28461	C12 H12 O2 S1	(R)-2-(2-Methoxyphenyl)-2,5-dihydrothiophene-3-carbaldehyde	at 296 K	None	None	yellow	None	None	acetone	None	Jie Tang, Ai-Bao Xia, Jun-Rong Jiang, Yifeng Wang
DUNION01	CHIRAL	Enantiopure	NO	NO	P1	1	TRUE	FALSE	2.7	2	1	2	C	2	2	2	0	0	(2, R)	1	2	chiral	C1	2	2	2	Wa-could be Diast	contains following chiral atom(s)C	NA	NA	7.31	8.64	15.597	102.29	90.5	111.38	892.226	1.53092	C21 H19 Br1 N2 O2	Dunnione p-bromophenylhydrazone	at 100 K	None	None	red	None	None	None	None	R.G.Cooke, E.L.Ghisalberti, B.L.Johnson, C.L.Raston, B.W.Skelton, A.H.White
DUPHOM	ACHIRAL	+ achiral molecule	NO	NO	P1	1	TRUE	FALSE	3.49	0	0	0	No Chiral atom	0	0	0	0	0						1	1	1	NA	contains following chiral atom(s)No Chiral atom	NA	NA	5.0915	8.3251	11.611	71.29	87.74	76.1	452.12	1.38608	C21 H19 N3 O4	4-(4-((3-Methoxybenzoyl)amino)phenoxy)-N-methylpyridine-2-carboxamide	at 113 K	None	391.5 K	colorless	None	None	ethanol	None	Na-Na Meng, Ting-Ting Huang, De-Kuan Li, Wen-Xin Zhang, Luo-Ting Yu
DUSLUB	CHIRAL	Enantiopure	NO	NO	P1	1	TRUE	FALSE	3.47	1	1	6	C	6	3	2	4	0	(1, RSSRSS)	1	1	chiral	C1	1	1	1	W1_enantiopure AU	contains following chiral atom(s)C	NA	NA	6.3417	7.2193	9.6397	89.911	82.709	70.612	412.549	1.22549	C20 H32 O2	16-hydroxyatisan-3-one	293 K	None	None	colorless	None	None	None	None	Zhong-Ping Jiang, Yi Yu, Li Shen
DUTTUK	CHIRAL	Enantiopure	NO	NO	P1	1	TRUE	FALSE	2.33	2	1	2	C	2	2	0	2	0	(2, S)	1	2	chiral	C1	2	2	2	Wa-could be Diast	contains following chiral atom(s)C	NA	NA	7.0294	9.3285	10.475	97.8315	101.945	94.98	661.04	1.33794	C18 H15 F1 O1	(S)-3-(4-Fluorophenyl)-2-methyl-5-phenylcyclopent-2-en-1-one	100 K	None	None	colorless	None	None	None	None	J.B.Metternich, M.Reiterer, E.N.Jacobsen
DUVFEG	CHIRAL	Enantiopure + achiral molecule	NO	NO	P1	1	TRUE	FALSE	2.98	1	1	10	C	10	7	6	4	0	(1, SRSRSRSRRR)	1	1	chiral	C1	2	1	1	W1_enantiopure AU	contains following chiral atom(s)C	NA	NA	8.367	8.5937	10.917	75.312	87.779	68.15	703.417	1.24095	C30 H39 N1 O5,C1 H4 O1	12-Benzyl-6-hydroxy-4,6,13,13a-tetramethyl-10-oxo-4,5,6,9,10,11,12,12a,13,13a,14a,14b-dodecahydro-3H-cycloundecadoxirenofisoindol-9-yl acetate methanol solvate	at 93 K	None	398 K	colorless	None	None	None	None	L.-m.Li, Y.Liu, T.Yang, K.-b.Yu, Q.Zou
DUYTIA	CHIRAL	Enantiopure + achiral molecule	NO	NO	P1	1	TRUE	FALSE	4.7	1	1	6	C	6	6	1	5	0	(1, SSSSRS)	1	1	chiral	C1	4	1	1	W1_enantiopure AU	contains following chiral atom(s)C	NA	NA	7.37	13.092	13.544	66.85	75.05	76.07	1146.57	1.25278	C46 H50 N6 O6,2(C1 H4 O1),H2 O1	Cyclo(L-prolyl-phenylalanyl-phenylalanyl-D-prolyl-phenylalanyl-phenylalanyl) methanol solvate monohydrate	None	None	None	colorless	None	None	None	None	H.Kessler, M.Klein, A.Muller, K.Wagner, J.W.Bats, K.Ziegler, M.Frimmer
EABHIY	CHIRAL	Enantiopure + achiral molecule	NO	NO	P1	1	TRUE	FALSE	3.9	2	1	4	C	4	4	0	4	0	(2, SS)	1	2	chiral	C1	5	1	1	Wa-could be Diast	contains following chiral atom(s)C	NA	NA	12.032	12.924	12.934	110.3	116.12	92.8	1644.45	1.31759	2(C31 H26 Cl4 O4),3(C1 H4 O1)	bis((4R,5R)-2,2-Dimethyl-Î±,Î±,Î±,Î±-tetrakis(p-chlorophenyl)-1,3-dioxolane-4,5-dimethanol) tris(methanol) clathrate	None	None	None	None	None	None	None	None	E.Weber, N.Dorpinghaus, C.Wimmer, Z.Stein, H.Krupitsky, I.Goldberg
EBEPEJ	ACHIRAL	+ achiral molecule	NO	NO	P1	1	TRUE	FALSE	4.06	0	0	0	No Chiral atom	0	0	0	0	0						2	2	2	NA	contains following chiral atom(s)No Chiral atom	NA	NA	5.6155	7.605	17.646	94.794	90.406	92.54	750.17	1.32969	C17 H20 N2 O3	1,3-bis(4-methoxybenzyl)urea	100 K	None	None	colorless	None	None	None	None	O.V.Kulikov, D.A.Siriwardane, G.T.McCandless, C.Barnes, Y.V.Sevryugina, J.D.DeSousa, Jingbo Wu, R.Sommer, B.M.Novak
EBOPOE	CHIRAL	Enantiopure	NO	NO	P1	1	TRUE	FALSE	3.96	4	1	36	C	36	20	16	20	0	(4, SSSSRSRRR)	1	4	chiral	C1	4	4	4	Wa-could be Diast	contains following chiral atom(s)C	NA	NA	12.7982	14.8814	19.2307	71.479	89.922	74.809	3338.1	1.2551	C35 H50 O10	t-butyl 3-5-(acetyloxy)-6,10,10b-trihydroxy-3,4a,7,7,10a-pentamethyl-1-oxododecahydro-1H-naphtho2,1-bpyran-3-yl-2-(4-acetylphenyl)propanoate	100.0 K	None	None	colorless	None	None	None	None	Sicong Chen, Qi Zhu, Yuhui Cao, Chen Li, Yinliang Guo, Lingran Kong, Jinteng Che, Zhixian Guo, Han Chen, Nan Zhang, Xianhe Fang, Jia-Tian Lu, Tuoping Luo
ECABIU	CHIRAL	Enantiopure	NO	NO	P1	1	TRUE	FALSE	3.12	1	1	3	C	3	3	1	2	0	(1, RSS)	1	1	chiral	C1	1	1	1	W1_enantiopure AU	contains following chiral atom(s)C	NA	NA	5.7296	11.8879	5.0674	100.472	92.263	83.228	336.981	1.30249	C17 H16 N2 O1	(1S,2R,(S))-1-(Î±-Cyanobenzylamido)indan-2-ol	at 298 K	None	None	colorless	None	None	None	None	R.Sakurai, S.Suzuki, J.Hashimoto, M.Baba, O.Itoh, A.Uchida, T.Hattori, S.Miyano, M.Yamaura
ECARUV	CHIRAL	Enantiopure	NO	NO	P1	1	TRUE	FALSE	3.78	2	1	4	C	4	4	0	4	0	(2, SS)	1	2	chiral	C1	2	2	2	Wa-could be Diast	contains following chiral atom(s)C	NA	NA	8.5433	11.1139	11.1251	72.371	69.721	89.073	939.645	1.28792	C20 H20 N4 O3	5-((S)-1-(Benzyloxycarbonyl)ethyl)-3,3a(S)-dihydro-1,2,3-triazolo(1,5-a)(1,4)benzodiazepine-4(6H)-one	at 291 K	None	94-96 deg.C	colorless	None	None	None	None	G.Broggini, L.Garanti, G.Molteni, T.Pilati
ECASEJ	CHIRAL	Enantiopure	NO	NO	P1	1	TRUE	FALSE	2.97	1	1	1	C	1	0	0	1	0	(1, S)	1	1	chiral	C1	1	1	1	W2_enantiopure AU	contains following chiral atom(s)C	NA	NA	6.5505	8.7111	9.9103	82.5366	73.6985	76.9181	527.348	1.36623	C25 H20 Cl1 N1 O4	4-chlorophenyl 1-(4-methoxyphenyl)-4-methylene-5-oxo-2-phenylprolinate	173 K	None	400-402 K	colorless	None	None	None	None	Tetsuya Sengoku, K.Kokubo, M.Sakamoto, M.Takahashi, H.Yoda
ECAVUB	CHIRAL	Enantiopure	NO	NO	P1	1	TRUE	FALSE	3.55	2	1	2	C	2	2	2	0	0	(2, R)	1	2	chiral	C1	2	2	2	Wa-could be Diast	contains following chiral atom(s)C	NA	NA	9.058	9.824	14.734	98.499	96.322	92.204	1286.83	1.38085	C26 H29 B2 Br1 N2 O4	2-Bromobenzyl 3-(1H-naphtho1,8-de1,3,2diazaborinin-2(3H)-yl)-3-(4,4,5,5-tetramethyl-1,3,2-dioxaborolan-2-yl)propanoate	at 173 K	None	None	colorless	None	None	methanol	None	J.C.H.Lee, R.McDonald, D.G.Hall
ECEHAY	CHIRAL	Enantiopure	NO	NO	P1	1	TRUE	FALSE	3.65	4	1	8	C	8	4	8	0	0	(4, RR)	1	4	chiral	C1	4	4	4	Wa-could be Diast	contains following chiral atom(s)C	NA	NA	7.9939	8.0488	22.5543	96.579	96.368	90.008	1432.6	1.62359	C16 H13 Br1 F1 N1 O2	3-((2-bromophenyl)(hydroxy)methyl)-3-fluoro-1-methyl-1,3-dihydro-2H-indol-2-one	296 K	None	None	None	None	None	None	None	Lijun Zhang, Wenzhong Zhang, Haibo Mei, Jianlin Han, V.A.Soloshonok, Yi Pan
ECIYAU	CHIRAL	Enantiopure	NO	NO	P1	1	TRUE	FALSE	4.75	1	1	1	C	1	1	1	0	0	(1, R)	1	1	chiral	C1	1	1	1	W2_enantiopure AU	contains following chiral atom(s)C	NA	NA	4.2284	5.2413	14.5118	87.206	83.328	88.681	319.008	1.33121	C13 H18 Cl1 N1 O2	4-chloro-N-(2-hydroxyhexyl)benzamide	119.1 K	None	None	light colorless	None	None	None	None	Wei Zhao, Ke-Zhi Chen, An-Zhen Li, Bi-Jie Li
ECUROM	ACHIRAL	+ achiral molecule	NO	NO	P1	1	TRUE	FALSE	3.12	0	0	0	No Chiral atom	0	0	0	0	0						2	2	2	NA	contains following chiral atom(s)No Chiral atom	NA	NA	8.4979	9.606	9.7613	90.716	105.714	100.679	752.101	1.22475	C19 H19 N1 O1	1-benzyl-3-phenyl-1,5,6,7-tetrahydro-2H-azepin-2-one	296 K	None	None	colorless	None	None	None	None	Yue Hu, Hanmin Huang
ECUYUA	CHIRAL	Enantiopure	NO	NO	P1	1	TRUE	FALSE	3.59	2	1	2	C	2	0	2	0	0	(2, R)	1	2	chiral	C1	2	2	2	Wa-could be Diast	contains following chiral atom(s)C	NA	NA	9.44083	9.9132	10.2773	105.234	90.2568	106.265	887.73	1.26005	C20 H17 Cl1 N2 O1	5-benzyl-5-(6-chloro-1H-indol-3-yl)-4-methyl-1,5-dihydro-2H-pyrrol-2-one	295 K	None	None	colorless	None	None	None	None	M.Saidah, M.I.D.Mardjan, G.Masson, J.-L.Parrain, L.Commeiras
EDAWIT	CHIRAL	Enantiopure	NO	NO	P1	1	TRUE	FALSE	3.54	2	1	2	C	2	0	0	2	0	(2, S)	1	2	chiral	C1	2	2	2	Wa-could be Diast	contains following chiral atom(s)C	NA	NA	9.8162	10.2385	10.8162	100.376	98.849	106.912	998.178	1.36876	C24 H17 F4 N1 O1	4-(3-fluorophenyl)-N,2-diphenyl-2-(2,2,2-trifluoroethyl)but-3-ynamide	173 K	None	None	colorless	None	None	None	None	Dunqi Wu, Lianqian Wu, Pinhong Chen, Guosheng Liu
EDEHAX	CHIRAL	Enantiopure	NO	NO	P1	1	TRUE	FALSE	3.92	2	1	6	C	6	6	0	6	0	(2, SSS)	1	2	chiral	C1	2	2	2	Wa-could be Diast	contains following chiral atom(s)C	NA	NA	9.7315	12.395	12.4509	75.566	78.31	88.11	1424.04	1.11652	C32 H50 N2 O1	5-butyl-3-((2,6-diphenylpiperidin-1-yl)amino)-4,4-dimethylnonan-5-ol	at 100 K	None	None	colorless	None	None	petroleum ether	None	E.Diez, A.Prieto, M.Simon, J.Vazquez, E.Alvarez, R.Fernandez, J.M.Lassaletta
EDEMOR	CHIRAL	Enantiopure	NO	NO	P1	1	TRUE	FALSE	4.41	2	1	2	C	2	2	2	0	0	(2, R)	1	2	chiral	C1	2	2	2	Wa-could be Diast	contains following chiral atom(s)C	NA	NA	10.0136	10.1157	10.9568	108.517	101.863	115.104	874.953	1.28445	C18 H26 O6	Ethyl (3,5-dihydroxy-2-(6-hydroxyoctanoyl)phenyl)acetate	at 147 K	None	None	colorless	None	None	None	None	M.von Delius, C.M.Le, V.M.Dong
EDIYEV	CHIRAL	Enantiopure	NO	NO	P1	1	TRUE	FALSE	3.9	1	1	6	C	6	6	4	2	0	(1, RSRRRS)	1	1	chiral	C1	1	1	1	W1_enantiopure AU	contains following chiral atom(s)C	NA	NA	8.238	13.294	6.504	91.03	93.39	101.9	695.432	1.04262	C30 H45 P1	2,5-bis((-)-Menthyl)-1-phenylphosphole	None	None	118-120deg.C	colorless	None	None	dichloromethane/ethanol	None	M.Ogasawara, K.Yoshida, T.Hayashi
EDODUZ	CHIRAL	Enantiopure	NO	NO	P1	1	TRUE	FALSE	2.81	1	1	8	C	8	5	2	6	0	(1, SSSSRRSS)	1	1	chiral	C1	1	1	1	W1_enantiopure AU	contains following chiral atom(s)C	NA	NA	6.1629	7.0679	11.0523	98.0396	95.2532	112.941	433.321	1.26242	C20 H27 N1 O3	3,17-dihydroxy-4,5-epoxyandrost-2-ene-2-carbonitrile	100 K	None	None	colorless	None	None	None	None	M.Jopp, J.Becker, M.Lerch, A.Miska, H.Hausmann, R.Neiger, S.Schindler
EDOFAH	CHIRAL	Enantiopure	NO	NO	P1	1	TRUE	FALSE	3.67	1	1	7	C	7	4	3	4	0	(1, SSRSRRS)	1	1	chiral	C1	1	1	1	W1_enantiopure AU	contains following chiral atom(s)C	NA	NA	6.2779	7.117	10.6179	98	95.205	114.791	420.59	1.29268	C20 H25 N1 O3	3-hydroxy-17-oxo-4,5-epoxyandrost-2-ene-2-carbonitrile	100 K	None	None	colorless	None	None	None	None	M.Jopp, J.Becker, M.Lerch, A.Miska, H.Hausmann, R.Neiger, S.Schindler
EDOFEI	CHIRAL	Enantiopure	NO	NO	P1	1	TRUE	FALSE	3.51	2	1	2	C	2	2	0	2	0	(2, S)	1	2	chiral	C1	2	2	2	Wa-could be Diast	contains following chiral atom(s)C	NA	NA	6.3159	7.3864	14.8272	94.68	98.605	113.842	617.797	1.43163	C12 H14 N2 O3 S1	3-p-Tosyl-4-vinyl-imidazolin-2-one	at 173 K	None	416-418 K	colorless	None	None	None	None	L.E.Overman, T.P.Remarchuk
EDOFEM	CHIRAL	Enantiopure	NO	NO	P1	1	TRUE	FALSE	4.12	1	1	2	C	2	2	0	2	0	(1, SS)	1	1	chiral	C1	1	1	1	W1_enantiopure AU	contains following chiral atom(s)C	NA	NA	5.1618	8.6542	10.5664	112.852	96.462	99.605	420.62	1.21376	C17 H25 N1 O2 S1	t-butyl 2-(phenylsulfanyl)cyclohexylcarbamate	100 K	None	None	colorless	None	None	None	None	Kai Lang, Yang Hu, Wan-Chen Cindy Lee, X.Peter Zhang
EDOZAB	CHIRAL	Enantiopure	NO	NO	P1	1	TRUE	FALSE	3.66	6	1	12	C	12	6	12	0	0	(6, RR)	1	6	chiral	C1	6	6	6	Wa-could be Diast	contains following chiral atom(s)C	NA	NA	8.33571	16.0784	22.5436	92.618	90.386	98.045	2988.28	1.23523	C26 H26 O2	1-(biphenyl-4-yl)-2-((2R,6R)-methyl-6-phenyltetrahydro-2H-pyran-2-yl)ethanone	93 K	None	None	colorless	None	None	None	None	N.Yoneda, A.Matsumoto, K.Asano, S.Matsubara
EDUFES	CHIRAL	Enantiopure	NO	NO	P1	1	TRUE	FALSE	3.18	1	1	3	C	3	3	1	2	0	(1, SRS)	1	1	chiral	C1	1	1	1	W1_enantiopure AU	contains following chiral atom(s)C	NA	NA	4.5145	7.5184	14.509	81.136	86.813	83.24	482.845	1.41145	C23 H22 O7	5-hydroxy-8,9-dimethoxy-2-(prop-1-en-2-yl)-1,2,12,12a-tetrahydrofuro2,3:7,81benzopyrano2,3-c1benzopyran-6(6aH)-one	189.6 K	None	None	colorless	None	None	methanol	None	V.Suthiphasilp, N.Rujanapun, P.Kumboonma, Boonyanoot Chaiyosang, S.Tontapha, T.Maneerat, B.O.Patrick, R.J.Andersen, Thidarat Duangyod, R.Charoensup, S.Laphookhieo
EFAFUO	ACHIRAL	+ achiral molecule	NO	NO	P1	1	TRUE	FALSE	4.35	0	0	0	No Chiral atom	0	0	0	0	0						1	1	1	NA	contains following chiral atom(s)No Chiral atom	NA	NA	5.7806	7.9407	9.6089	82.579	76.793	83.51	424.209	1.18763	C21 H21 N1 O1	(2E)-1-Phenyl-2-1-(2-phenylprop-2-en-1-yl)pyrrolidin-2-ylideneethanone	at 293 K	None	None	colorless	None	None	None	None	L.G.Madeley, G.L.Morgans, A.Lemmerer, J.P.Michael
EFEQUD	ACHIRAL	+ achiral molecule	NO	NO	P1	1	TRUE	FALSE	4.02	0	0	0	No Chiral atom	0	0	0	0	0						2	2	2	NA	contains following chiral atom(s)No Chiral atom	NA	NA	4.972	13.595	14.056	117.303	90.014	90.03	844.258	1.29979	C22 H22 N2 O1	4-((5-isopropyl-3,8-dimethylazulen-1-yl)diazenyl)benzaldehyde	at 100 K	None	None	green	None	None	None	None	S.Takekuma, A.Seki, T.Minematsu
EGAXOZ01	ACHIRAL	+ achiral molecule	NO	NO	P1	1	TRUE	FALSE	2.96	0	0	0	No Chiral atom	0	0	0	0	0						2	2	2	NA	contains following chiral atom(s)No Chiral atom	NA	NA	6.2971	7.9701	9.4084	79.645	85.522	73.033	444.12	1.28068	C7 H13 N3 S1	2-cyclohexylidenehydrazine-1-carbothioamide	298 K	None	None	white	None	None	None	None	M.Singh, S.Anthal, R.Chandrasekaran, S.Murugavel, S.S.Sankpal, M.B.Deshmukh, R.Kant
EGEVUH	CHIRAL	Enantiopure	NO	NO	P1	1	TRUE	FALSE	4.92	2	1	4	C	4	2	2	2	0	(2, SR)	1	2	chiral	C1	2	2	2	Wa-could be Diast	contains following chiral atom(s)C	NA	NA	5.9018	9.814	15.715	87.863	80.098	85.539	893.676	1.33184	C19 H22 N2 O5	6-O-Benzyl-4-ethoxy-2,3-didehydro-2,3-dideoxy-ribofuranosyl-thymine	at 293K	None	133-135 deg.C	None	None	None	None	None	L.S.Hegedus, K.L.Hervert, S.Matsui
EGIXUO	CHIRAL	Enantiopure	NO	NO	P1	1	TRUE	FALSE	3.48	2	1	6	C	6	4	0	6	0	(2, SSS)	1	2	chiral	C1	2	2	2	Wa-could be Diast	contains following chiral atom(s)C	NA	NA	6.3335	7.2872	20.5729	91.2787	97.7238	114.408	853.613	1.16887	C20 H28 O2	Ottensinin	at 200 K	None	401-402 K	brown	None	None	None	None	J.Boukouvalas, Jian-Xin Wang
EGONIY	CHIRAL	Enantiopure	NO	NO	P1	1	TRUE	FALSE	3.31	2	1	4	C	4	2	2	2	0	(2, SR)	1	2	chiral	C1	2	2	2	Wa-could be Diast	contains following chiral atom(s)C	NA	NA	7.7998	7.8947	13.2617	81.632	79.221	87.462	793.545	1.40761	C20 H16 O5	Salvileucalin A	at 90 K	None	None	colorless	None	None	None	None	Y.Aoyagi, A.Yamazaki, C.Nakatsugawa, H.Fukaya, K.Takeya, S.Kawauchi, H.Izumi
EGOTOK	CHIRAL	Enantiopure	NO	NO	P1	1	TRUE	FALSE	4.76	2	1	6	C	6	0	2	4	0	(2, SRS)	1	2	chiral	C1	2	2	2	Wa-could be Diast	contains following chiral atom(s)C	NA	NA	7.2898	9.3886	15.9051	91.007	97.177	111.934	999.41	1.41031	C18 H24 N4 O8	(2R,5S,6S)-1-((2-Allyl-5,6-dimethoxy-5,6-dimethyl-1,4-dioxan-2-yl)methylene)-2-(2,4-dinitrophenyl)hydrazine	at 180 K	None	384-386 K	colorless	None	None	ethanol	None	K.L.Bridgwood, C.C.Tzschucke, M.OBrien, S.Wittrock, J.M.Goodman, J.E.Davies, A.W.J.Logan, M.R.M.Huttl, S.V.Ley
EGOXIK	CHIRAL	Enantiopure	NO	NO	P1	1	TRUE	FALSE	4.67	2	1	4	C	4	4	2	2	0	(2, RS)	1	2	chiral	C1	2	2	2	Wa-could be Diast	contains following chiral atom(s)C	NA	NA	6.4537	11.7057	12.3034	108.846	102.02	101.741	822.718	1.16823	C15 H19 N1 O3 Si1	3-hydroxy-1-(4-methoxyphenyl)-4-(trimethylsilyl)ethynylazetidin-2-one	296 K	None	None	colorless	None	None	None	None	S.Domin, J.Kedzierski, B.K.Zambron
EGOZAE	CHIRAL	Enantiopure + achiral molecule	NO	NO	P1	1	TRUE	FALSE	4.93	6	1	12	C	12	12	0	12	0	(6, SS)	1	6	chiral	C1	8	6	6	Wa-could be Diast	contains following chiral atom(s)C	NA	NA	10.6849	17.9849	20.2503	91.331	97.757	93.114	3848.3	1.26348	C22 H22 Cl2 N4 O4,0.167(C2 H6 O1),0.167(H2 O1)	N1,N2-bis(3-chloro-2-hydroxyphenyl)methylidenecyclohexane-1,2-dicarbohydrazide ethanol solvate hydrate	291.9 K	None	None	colorless	None	None	None	None	Man Wang, Caiqi Cheng, Chunbo Li, Dehua Wu, Jintong Song, Jun Wang, Xiangge Zhou, Haifeng Xiang, Jin Liu
EGOZIK	CHIRAL	Enantiopure	NO	NO	P1	1	TRUE	FALSE	3.91	2	1	10	C	10	10	6	4	0	(2, RRRSS)	1	2	chiral	C1	2	2	2	Wa-could be Diast	contains following chiral atom(s)C	NA	NA	6.4963	6.676	14.235	102.91	92.764	91.47	600.635	1.35594	C10 H15 N1 O6	2-(((3,4,5-Trihydroxy-6-(hydroxymethyl)tetrahydro-2H-pyran-2-yl)oxy)methyl)acrylonitrile.	at 298 K	None	None	colorless	None	None	methanol	None	J.E.Forero, L.Avila, N.Taborda, P.Tabares, A.Lopez, F.Torres, W.Quinones, M.A.Bucio, Y.Mora-Perez, M.T.Rugeles, P.Joseph-Nathan, F.Echeverri
EGUSEF	ACHIRAL	+ achiral molecule	NO	NO	P1	1	TRUE	FALSE	2.71	0	0	0	No Chiral atom	0	0	0	0	0						1	1	1	NA	contains following chiral atom(s)No Chiral atom	NA	NA	4.8718	6.842	10.709	98.014	93.258	97.413	349.502	1.65412	C14 H10 Br1 N3 O3	(E)-4-Bromo-N-(2-nitrobenzylidene)benzohydrazide	at 298 K	None	None	colorless	None	None	absolute methanol	None	Ming-Jun Zhang, Li-Zi Yin, Da-Cheng Wang, Xu-Ming Deng, Jing-Bo Liu
EGUWOV	CHIRAL	Enantiopure	NO	NO	P1	1	TRUE	FALSE	3.16	2	1	2	C	2	2	0	2	0	(2, S)	1	2	chiral	C1	2	2	2	Wa-could be Diast	contains following chiral atom(s)C	NA	NA	9.8268	10.7524	12.3034	104.385	99.112	92.482	1238.7	1.14903	C28 H32 N2 O2	N-(3,3-dimethylbutan-2-yl)-N2-(triphenylacetyl)glycinamide	130 K	None	None	colorless	None	None	None	None	W.Bendzinska-Berus, M.Jelecki, M.Kwit, U.Rychlewska
EGUYUD	CHIRAL	Enantiopure	NO	NO	P1	1	TRUE	FALSE	3.83	2	1	4	C	4	4	4	0	0	(2, RR)	1	2	chiral	C1	2	2	2	Wa-could be Diast	contains following chiral atom(s)C	NA	NA	9.475	9.6439	10.829	85.185	81.59	82.894	969.163	1.39932	C19 H22 Br1 N1 O2 S1	4-bromo-N-2-methyl-2-(2-phenylcyclopropyl)propylbenzene-1-sulfonamide	293 K	None	None	colorless	None	None	None	None	Gao-Peng Zhang, Shuai Huang, Yang-Jie Jiang, Xiu-Yan Liu, Chang-Hua Ding, Yin Wei, Xue-Long Hou
EHAROV	CHIRAL	Enantiopure	NO	NO	P1	1	TRUE	FALSE	2.54	2	1	4	C	4	4	4	0	0	(2, RR)	1	2	chiral	C1	2	2	2	Wa-could be Diast	contains following chiral atom(s)C	NA	NA	5.101	9.3005	14.8782	87.527	82.517	84.854	696.663	1.46995	C14 H16 N2 O4 S1	cis-Methyl 6-(2-anilino-2-oxoethyl)-5-oxothiomorpholine-3-carboxylate	at 173 K	None	None	colorless	None	None	methanol	None	G.Carr, D.E.Williams, A.R.Diaz-Marrero, B.O.Patrick, H.Bottriell, A.D.Balgi, E.Donohue, M.Roberge, R.J.Andersen
EHAVAL	CHIRAL	Enantiopure	NO	NO	P1	1	TRUE	FALSE	3.84	1	1	1	C	1	0	1	0	0	(1, R)	1	1	chiral	C1	1	1	1	W2_enantiopure AU	contains following chiral atom(s)C	NA	NA	6.7943	6.0697	8.6532	90.358	104.185	90.069	345.964	1.20153	C15 H22 O3	(R)-6-(2-Hydroxyethyl)-2-(hydroxymethyl)-2,5,7-trimethylindan-4-ol	at 123 K	None	None	colorless	None	None	methanol/water	None	G.R.Pettit, Yanhui Meng, R.K.Pettit, D.L.Herald, Z.A.Cichacz, D.L.Doubek, L.Richert
EHIHAG	CHIRAL	Enantiopure	NO	NO	P1	1	TRUE	FALSE	3.52	1	1	2	C	2	1	1	1	0	(1, RS)	1	1	chiral	C1	1	1	1	W1_enantiopure AU	contains following chiral atom(s)C	NA	NA	5.9062	11.344	11.432	66.402	89.527	81.915	693.941	1.37576	C29 H33 Br1 Cl1 N1 O4	t-Butyl 4-(4-bromophenyl)-2-((4-chlorobenzyl)amino)-7,7-dimethyl-5-oxo-3,4,5,6,7,8-hexahydro-2H-chromene-2-carboxylate	173.2 K	None	None	colorless	None	None	None	None	Chao Rong, Hongjie Pan, Mao Liu, Hua Tian, Yian Shi
EHIKAK	CHIRAL	Enantiopure	NO	NO	P1	1	TRUE	FALSE	4.89	2	1	4	C	4	4	2	2	0	(2, SR)	1	2	chiral	C1	2	2	2	Wa-could be Diast	contains following chiral atom(s)C	NA	NA	4.9505	8.582	19.942	88.027	85.435	89.121	843.984	1.47833	C15 H20 Br1 Cl1 N2 O2	N-3-(acetylamino)-2-chlorohexyl-4-bromobenzamide	173 K	None	None	colorless	None	None	None	None	D.C.Steigerwald, B.Soltanzadeh, A.Sarkar, C.C.Morgenstern, R.J.Staples, B.Borhan
EHUGIX	CHIRAL	Enantiopure	NO	NO	P1	1	TRUE	FALSE	3.72	2	1	2	C	2	2	0	2	0	(2, S)	1	2	chiral	C1	2	2	2	Wa-could be Diast	contains following chiral atom(s)C	NA	NA	5.8798	10.8498	17.1745	89.178	81.126	88.784	1082.21	1.28108	C21 H27 N3 O6	N-((Benzyloxy)carbonyl)-1-(2-t-butoxy-2-oxoethyl)histidine methyl ester	at 183 K	None	None	colorless	None	None	ethyl acetate/1-hexene	None	Jae Kyoung Pak, P.Benny, B.Spingler, K.Ortner, R.Alberto
EHUGIZ	CHIRAL	Enantiopure	NO	NO	P1	1	TRUE	FALSE	3.18	2	1	2	C	2	2	2	0	0	(2, R)	1	2	chiral	C1	2	2	2	Wa-could be Diast	contains following chiral atom(s)C	NA	NA	7.02512	8.17982	10.0807	104.135	104.019	91.6954	542.58	1.516	C13 H10 Cl1 N1 O2	(R)-7-chloro-1-oxo-1,2,3,3a-tetrahydropyrrolo1,2-a quinoline-4-carbaldehyde	100.0 K	None	None	colorless	None	None	None	None	E.Sanchez-Diez, D.L.Vesga, E.Reyes, Uxue Uria, L.Carrillo, J.L.Vicario
EJACEZ	CHIRAL	Enantiopure	NO	NO	P1	1	TRUE	FALSE	3.92	2	1	6	C	6	6	4	2	0	(2, RSR)	1	2	chiral	C1	2	2	2	Wa-could be Diast	contains following chiral atom(s)C	NA	NA	8.444	11.055	13.733	98.62	107.12	93	1204.98	1.42604	C29 H25 Br1 O4	5-(4-bromophenyl)-2-methyl-3-phenyldispiro1,3-dioxolane-2,1-cyclohexane-4,2-indene-1,3-dione	200 K	None	None	colorless	None	None	None	None	G.Madhusudhan Reddy, Chi-Ting Ko, Kai-Hong Hsieh, Chia-Jui Lee, U.Das, Wenwei Lin
EJEDIJ	CHIRAL	Enantiopure	NO	NO	P1	1	TRUE	FALSE	3.87	2	1	4	C	4	2	4	0	0	(2, RR)	1	2	chiral	C1	2	2	2	Wa-could be Diast	contains following chiral atom(s)C	NA	NA	8.7657	9.6615	11.4746	79.3918	89.6083	82.2116	946.198	1.31768	C23 H21 N1 O4	methyl (cyclohex-2-en-1-yl)(1,3-dioxo-1,3-dihydro-2H-isoindol-2-yl)phenylacetate	100 K	None	None	colorless	None	None	None	None	T.J.Fulton, A.Q.Cusumano, E.J.Alexy, Y.E.Du, Haiming Zhang, K.N.Houk, B.M.Stoltz
EJEQER	CHIRAL	Enantiopure + achiral molecule	NO	NO	P1	1	TRUE	FALSE	4.23	2	1	2	C	2	2	0	2	0	(2, S)	1	2	chiral	C1	3	1	1	Wa-could be Diast	contains following chiral atom(s)C	NA	NA	5.2967	6.2757	17.5868	84.456	82.571	89.979	576.932	1.44054	C15 H10 O5,2(C5 H9 N1 O2)	5,7-dihydroxy-3-(4-hydroxyphenyl)-4H-chromen-4-one bis(pyrrolidinium-2-carboxylate)	296 K	None	None	colorless	None	None	None	None	Hongyan He, Ying Huang, Qi Zhang, Jian-Rong Wang, Xuefeng Mei
EJEQUH	CHIRAL	Enantiopure + achiral molecule	NO	NO	P1	1	TRUE	FALSE	4.31	2	1	2	C	2	2	2	0	0	(2, R)	1	2	chiral	C1	3	1	1	Wa-could be Diast	contains following chiral atom(s)C	NA	NA	5.3009	6.2793	17.5971	84.458	82.609	89.969	578.112	1.4376	C15 H10 O5,2(C5 H9 N1 O2)	5,7-dihydroxy-3-(4-hydroxyphenyl)-4H-chromen-4-one bis(pyrrolidinium-2-carboxylate)	296 K	None	None	colorless	None	None	None	None	Hongyan He, Ying Huang, Qi Zhang, Jian-Rong Wang, Xuefeng Mei
EJUPUU	CHIRAL	Enantiopure + achiral molecule	NO	NO	P1	1	TRUE	FALSE	4.53	2	1	8	C	8	6	4	4	0	(2, SRRS)	1	2	chiral	C1	4	2	2	Wa-could be Diast	contains following chiral atom(s)C	NA	NA	7.47	7.9529	17.1108	80.923	80.327	83.735	985.95	1.51711	C20 H20 N2 O9,H2 O1	Trichodermamide A monohydrate	at 173 K	None	497-499 K	colorless	None	None	None	None	E.Garo, C.M.Starks, P.R.Jensen, W.Fenical, E.Lobkovsky, J.Clardy
EKAWUK	CHIRAL	Enantiopure	NO	NO	P1	1	TRUE	FALSE	3.63	2	1	4	C	4	4	2	2	0	(2, SR)	1	2	chiral	C1	2	2	2	Wa-could be Diast	contains following chiral atom(s)C	NA	NA	8.6386	9.2367	15.275	85.791	74.646	85.096	1169.39	1.43678	C26 H20 Cl1 N3 O6	(S)-1-(3-Methylquinoxalin-2-yl)-1-((4-nitrobenzoyl)oxy)propan-2-yl 3-chlorobenzoate	123 K	None	None	colorless	None	None	None	None	R.Klemme, C.Bentz, T.Zukowski, L.Schefzig, D.Lentz, H.-U.Reissig, R.Zimmer
EKILEP	CHIRAL	Enantiopure	NO	NO	P1	1	TRUE	FALSE	3.88	1	1	2	C	2	2	1	1	0	(1, SR)	1	1	chiral	C1	1	1	1	W1_enantiopure AU	contains following chiral atom(s)C	NA	NA	5.7043	7.5376	13.94	96.699	91.816	91.662	594.66	1.2747	C24 H28 N2 O7	(4R,5S)-5-(N,N-bis(Benzyloxycarbonyl)hydrazino)hexan-2-on-4-yl acetate	at 296 K	None	None	colorless	None	None	dichloromethane/hexane	None	N.S.Chowdari, D.B.Ramachary, C.F.Barbas III
EKILUI	CHIRAL	Enantiopure	NO	NO	P1	1	TRUE	FALSE	3.88	1	1	7	C	7	4	3	4	0	(1, SRSSRSR)	1	1	chiral	C1	1	1	1	W1_enantiopure AU	contains following chiral atom(s)C	NA	NA	6.6351	7.1483	9.6959	89.551	84.704	76.73	445.641	1.26124	C20 H34 O4	pimar-8(14)-ene-3(R),15(R),16(R),18(R)-tetrol	100 K	None	None	colorless	None	None	None	None	Zhejun Sun, Yuting Zhang, Huihao Zhou, Jun Xu, Qiong Gu
EKOKOE	RACEMATE	Strict definition of kryptoracemate	KRYPTORACEMIC	NO	P1	1	TRUE	FALSE	2.54	2	1	6	C	6	4	3	3	0	(1, SRR), (1, RSS)	2	2	racemic	C1	2	2	2	RAC-1	contains following chiral atom(s)C	NA	NA	8.038	10.391	12.299	100.51	107.29	104.9	909.795	1.2063	C21 H30 O3	6Î±-Hydroxysugiyl methyl ether	at 293 K	None	444-445 K	colorless	None	None	None	None	Anpai Li, Xuegong She, Jiyong Zhang, Tongxing Wu, Xinfu Pan
ELECUW	CHIRAL	Enantiopure	NO	NO	P1	1	TRUE	FALSE	3.84	2	1	4	C	4	4	2	2	0	(2, SR)	1	2	chiral	C1	2	2	2	Wa-could be Diast	contains following chiral atom(s)C	NA	NA	8.3532	10.0074	10.388	101.745	109.189	108.711	728.965	1.31363	C17 H20 O4	4,7-dimethoxy-1,5,8-trimethyl-8,9-dihydronaphtho2,1-bfuran-6(7H)-one	112.8 K	None	380-382 K	colorless	None	None	None	None	Wang Chaochao
ELEJUB01	CHIRAL	Enantiopure	NO	NO	P1	1	TRUE	FALSE	3.21	2	1	4	C	4	4	2	2	0	(2, RS)	1	2	chiral	C1	2	2	2	Wa-could be Diast	contains following chiral atom(s)C	NA	NA	6.0305	10.2143	12.273	92.325	100.757	92.917	740.771	1.34636	C16 H16 N2 O4	6-(((1-Hydroxy-1-phenylpropan-2-yl)amino)methylene)-4-nitrocyclohexa-2,4-dien-1-one	at 100 K	None	None	yellow	None	None	None	None	M.M.Tamizh, D.Kesavan, P.M.Sivakumar, K.Mereiter, M.Deepa, K.Kirchner, M.Doble, R.Karvembu
ELEKAI	CHIRAL	Enantiopure	NO	NO	P1	1	TRUE	FALSE	4.32	2	1	4	C	4	4	2	2	0	(2, RS)	1	2	chiral	C1	2	2	2	Wa-could be Diast	contains following chiral atom(s)C	NA	NA	7.2044	9.3402	12.3377	69.1986	80.3396	75.9081	749.704	1.48049	C16 H16 Br1 N1 O2	2-(((1S,2R)-1-hydroxy-1-phenylpropan-2-ylimino)methyl)-4-bromophenolate	at 293 K	None	None	orange	None	None	None	None	O.Dominguez, B.Rodriguez-Molina, M.Rodriguez, A.Ariza, N.Farfan, R.Santillan
ELEKAI01	CHIRAL	Enantiopure	NO	NO	P1	1	TRUE	FALSE	2.92	2	1	4	C	4	4	2	2	0	(2, RS)	1	2	chiral	C1	2	2	2	Wa-could be Diast	contains following chiral atom(s)C	NA	NA	7.1016	9.2799	12.299	69.075	80.006	75.075	728.541	1.52349	C16 H16 Br1 N1 O2	4-Bromo-6-(((1-hydroxy-1-phenylpropan-2-yl)amino)methylene)cyclohexa-2,4-dien-1-one	at 100 K	None	None	orange	None	None	None	None	M.M.Tamizh, D.Kesavan, P.M.Sivakumar, K.Mereiter, M.Deepa, K.Kirchner, M.Doble, R.Karvembu
ELIDIM	CHIRAL	Enantiopure + achiral molecule	NO	NO	P1	1	TRUE	FALSE	3.8	2	1	16	C	16	12	4	12	0	(2, SSSSRRSS)	1	2	chiral	C1	3	2	2	Wa-could be Diast	contains following chiral atom(s)C	NA	NA	7.781	10.598	12.432	95.131	107.49	97.32	960.937	1.28382	C21 H30 O5,0.5(H2 O1)	1-Î²-Hydroxycorticosterone hemihydrate	at 100 K	None	473-475K	colorless	None	None	None	None	R.S.V.S.Gadepalli, J.M.Rimoldi, F.R.Fronczek
ELUWOY	CHIRAL	Enantiopure	NO	NO	P1	1	TRUE	FALSE	2.95	1	1	4	C	4	4	2	2	0	(1, RSSR)	1	1	chiral	C1	1	1	1	W1_enantiopure AU	contains following chiral atom(s)C	NA	NA	5.3565	7.6392	10.099	76.068	85.27	86.338	399.308	1.29896	C19 H20 O4	(3aR,4R,7R,7aS)-4-(3-Oxopentyl)-7-phenyl-3a,4,7,7a-tetrahydro-2-benzofuran-1,3-dione	at 296 K	None	405-406 K	colorless	None	None	None	None	Chun-Ming Yang, M.Jeganmohan, K.Parthasarathy, Chien-Hong Cheng
EMEMUG	CHIRAL	Enantiopure	NO	NO	P1	1	TRUE	FALSE	3.95	2	1	2	C	2	0	0	2	0	(2, S)	1	2	chiral	C1	2	2	2	Wa-could be Diast	contains following chiral atom(s)C	NA	NA	9.548	10.705	12.059	87.745	67.638	83.773	1133.15	1.37571	C22 H23 F3 N1 O5 P1	Diethyl (2-(((benzyloxy)carbonyl)amino)-1,1,1-trifluoro-4-phenylbut-3-yn-2-yl)phosphonate	296 K	None	None	None	None	None	None	None	K.Morisaki, M.Sawa, R.Yonesaki, H.Morimoto, K.Mashima, T.Ohshima
EMIGEM	CHIRAL	Enantiopure	NO	NO	P1	1	TRUE	FALSE	3.26	1	1	3	C N	2	2	3	0	0	(1, RRR)	1	1	chiral	C1	1	1	1	W1_enantiopure AU	contains following chiral atom(s)C,N	NA	NA	6.71	6.767	8.059	71.51	84.68	70.16	326.397	1.21632	C13 H14 B1 N3 O1	Dicyano(((1S)-(1-phenylethyl)aziridin-2-yl)methanolato-Îº2N,O)boron	at 293 K	None	None	colorless	None	None	dichloromethane	None	Yongkwan Dong, Hoseop Yun, Chan Sun Park, Won Koo Lee, Hyun-Joon Ha
EMISUP	CHIRAL	Enantiopure	NO	NO	P1	1	TRUE	FALSE	3.61	1	1	1	C	1	0	0	1	0	(1, S)	1	1	chiral	C1	1	1	1	W2_enantiopure AU	contains following chiral atom(s)C	NA	NA	6.2174	9.1621	10.3772	68.885	72.909	71.408	511.837	1.19478	C22 H29 B1 O4	Ethyl 3-(2-naphthyl)-3-(4,4,5,5-tetramethyl-1,3,2-dioxaborolan-2-yl)butanoate	at 100 K	None	None	colorless	None	None	None	None	J.M.OBrien, Kang-sang Lee, A.H.Hoveyda
EMOVAG	CHIRAL	Enantiopure	NO	NO	P1	1	TRUE	FALSE	3.22	2	1	2	C	2	2	0	2	0	(2, S)	1	2	chiral	C1	2	2	2	Wa-could be Diast	contains following chiral atom(s)C	NA	NA	4.6153	4.8963	31.1476	89.0121	88.0335	75.7539	681.795	1.19997	C12 H26 N2 O3	(S)-N-(2,3-dihydroxypropyl)-N-octylurea	173 K	None	None	colorless	None	None	None	None	Li-Bo Huang, A.Hardiagon, I.Kocsis, C.-A.Jegu, M.Deleanu, A.Gilles, A.van der Lee, F.Sterpone, M.Baaden, M.Barboiu
EMUNAE	CHIRAL	Enantiopure	NO	NO	P1	1	TRUE	FALSE	3.93	1	1	8	C	8	3	0	8	0	(1, SSSSSSSS)	1	1	chiral	C1	1	1	1	W1_enantiopure AU	contains following chiral atom(s)C	NA	NA	7.0796	8.0559	8.5823	75.305	86.056	74.017	455.157	1.37321	C20 H24 O7	6a-(2,4-dimethyl-5-oxooxolane-2-carbonyl)-6-hydroxy-5,10-dimethyl-6,6a-dihydro-5H-5,8a-ethanocyclopenta1,2-b:2,3-bdifuran-2(3H)-one	175.0 K	None	None	colorless	None	None	None	None	Nantiya Bunbamrung, S.Kittisrisopit, C.Intaraudom, A.Dramae, C.Thawai, N.Niemhom, D.J.Harding, P.Auncharoen, P.Pittayakhajonwut
ENIREY	ACHIRAL	+ achiral molecule	NO	NO	P1	1	TRUE	FALSE	2.57	0	0	0	No Chiral atom	0	0	0	0	0						1	1	1	NA	contains following chiral atom(s)No Chiral atom	NA	NA	6.2144	6.8078	8.4492	102.896	94.7214	110.262	321.861	1.38968	C16 H15 N1 O1 S1	(Z)-(2-Benzo(b)thiophen-3-ylmethylene)-1-azabicyclo(2.2.2)octan-3-one	at 90.0 K	None	None	yellow	None	None	methanol	None	V.N.Sonar, S.Parkin, P.A.Crooks
ENOJIB	CHIRAL	Enantiopure	NO	NO	P1	1	TRUE	FALSE	3.21	2	1	6	C	6	2	6	0	0	(2, RRR)	1	2	chiral	C1	2	2	2	Wa-could be Diast	contains following chiral atom(s)C	NA	NA	8.128	10.975	11.19	118.11	103.43	92.06	843.997	1.11906	C19 H24 O2	4a-Ethyl-2-(prop-1-yn-1-yl)-1,2,3,4,4a,9,10,10a-octahydrophenanthrene-2,7-diol	at 293 K	None	None	None	None	None	None	None	R.P.Robinson, L.Buckbinder, A.I.Haugeto, P.A.McNiff, M.L.Milham, M.R.Reese, J.F.Schaefer, Y.A.Abramov, J.Bordner, Y.A.Chantigny, E.F.Kleinmann, E.R.Laird, B.P.Morgan, J.C.Murray, E.D.Salter, M.D.Wessel, S.A.Yocum
ENUPEJ	CHIRAL	Enantiopure + achiral molecule	NO	NO	P1	1	TRUE	FALSE	4.29	2	1	4	C	4	4	2	2	0	(2, RS)	1	2	chiral	C1	3	2	2	Wa-could be Diast	contains following chiral atom(s)C	NA	NA	10.6987	10.9301	15.3299	80.202	74.102	85.532	1698	1.26886	C36 H34 N4 O5,0.5(C7 H8)	N-(Quinolin-8-yl) (2S,3R)-NÎ±-phthaloyl-Î²-(N-t-butoxycarbonyl(indol-6-yl))leucinamide toluene solvate	at 130 K	None	None	colorless	None	None	None	None	B.T.Y.Li, J.M.White, C.A.Hutton
EPIBUD	CHIRAL	Contains at least 2 different chemicals in enantiopure proportions + achiral molecule	NO	NO	P1	1	TRUE	FALSE	3.32	3	2	11	C	11	11	6	5	0	(1, S), (2, RSRRS)	1, 1	1, 2	chiral, chiral	C1	6	1	1	Wa-could be Diast	contains following chiral atom(s)C	NA	NA	6.3123	12.1389	15.7274	81.733	89.733	87.487	1191.43	1.43552	2(C21 H20 O9),C5 H9 N1 O2,C2 H6 O1,2(H2 O1)	bis(puerarin) L-proline ethanol solvate dihydrate	296 K	None	None	colorless	None	None	None	None	M.Inam, Lu Liu, Jian-Wei Wang, Ka-Xi Yu, Chi-Uyen Phan, Jie Shen, Wen-Hua Zhang, Guping Tang, Xiurong Hu
EPUKOR	CHIRAL	Enantiopure	NO	NO	P1	1	TRUE	FALSE	4.67	2	1	2	C	2	2	0	2	0	(2, S)	1	2	chiral	C1	2	2	2	Wa-could be Diast	contains following chiral atom(s)C	NA	NA	6.8616	8.8688	8.9458	66.923	70.122	85.373	470.115	1.57757	C7 H13 N1 O3 S2	(S)-(+)-2-(1,5,3-dithiazepan-3-yl)-3-hydroxypropanoic acid	200 K	None	None	colorless	None	None	None	None	A.R.Tulyabaev, E.S.Mescheryakova, G.R.Khabibullina, L.M.Khalilov
EQAXOM	CHIRAL	Enantiopure	NO	NO	P1	1	TRUE	FALSE	4.82	2	1	2	C	2	2	2	0	0	(2, R)	1	2	chiral	C1	2	2	2	Wa-could be Diast	contains following chiral atom(s)C	NA	NA	5.3184	12.8968	16.5472	105.662	90.661	98.739	1078.5	1.29169	C25 H25 N1 O5	benzyl N-(4-methoxybenzoyl)-O-phenylhomoserinate	170 K	None	None	colorless	None	None	None	None	Zhen-Yao Dai, Zhong-Sheng Nong, Shun Song, Pu-Sheng Wang
EQEHOA	ACHIRAL	+ achiral molecule	NO	NO	P1	1	TRUE	FALSE	3.47	0	0	0	No Chiral atom	0	0	0	0	0						2	1	1	NA	contains following chiral atom(s)No Chiral atom	NA	NA	5.7858	8.6281	15.0315	102.014	92.9	92.926	731.546	1.42264	C22 H14 N2 O4 S2,C15 H12	2,6-dibenzyl-1H,5H-1,4dithiino2,3-c:5,6-cdipyrrole-1,3,5,7(2H,6H)-tetrone 2-methylanthracene	173.2 K	None	None	red	None	None	dichloromethane / hexane	None	D.S.Botes, S.Khorasani, W.Duminy, D.C.Levendis, M.A.Fernandes
EQIMEZ	CHIRAL	Enantiopure	NO	NO	P1	1	TRUE	FALSE	2.36	1	1	3	C	3	3	2	1	0	(1, SRR)	1	1	chiral	C1	1	1	1	W1_enantiopure AU	contains following chiral atom(s)C	NA	NA	5.916	8.773	10.055	78.878	77.102	87.499	499.144	1.26256	C23 H25 N1 O2 S1	4-benzylidene-5-methyl-2-(4-methylbenzene-1-sulfonyl)-2,3,3a,4,5,7a-hexahydro-1H-isoindole	123 K	None	None	colorless	None	None	None	None	Jun Li, S.R.Gilbertson
EQIMEZ01	CHIRAL	Enantiopure	NO	NO	P1	1	TRUE	FALSE	2.54	1	1	3	C	3	3	2	1	0	(1, SRR)	1	1	chiral	C1	1	1	1	W1_enantiopure AU	contains following chiral atom(s)C	NA	NA	5.9351	8.7706	10.0572	79.099	77.143	87.798	501.182	1.25742	C23 H25 N1 O2 S1	4-benzylidene-5-methyl-2-(4-methylbenzene-1-sulfonyl)-2,3,3a,4,5,7a-hexahydro-1H-isoindole	213 K	None	None	colorless	None	None	None	None	Yulin Han, Anni Qin, Qian Zhang, Xue Zhang, Hui Qian, Shengming Ma
EQOMIJ	CHIRAL	Enantiopure + achiral molecule	NO	NO	P1	1	TRUE	FALSE	3.66	2	1	2	C	2	2	2	0	0	(2, R)	1	2	chiral	C1	4	2	2	Wa-could be Diast	contains following chiral atom(s)C	NA	NA	7.6087	8.9186	16.0863	101.434	91.962	108.62	1008.33	1.36831	C23 H18 O5,C2 H3 N1	(+)-8-benzoyl-5,7-dihydroxy-6-methyl-2-phenyl-2,3-dihydro-4H-1-benzopyran-4-one acetonitrile solvate	109.8 K	None	None	None	None	None	None	None	Jiwu Huang, Chuangjun Li, Jie Ma, Kailing Xu, Xinyi Chen, Jiandong Jiang, Dongming Zhang
EQOMOP	CHIRAL	Enantiopure + achiral molecule	NO	NO	P1	1	TRUE	FALSE	3.81	2	1	2	C	2	2	0	2	0	(2, S)	1	2	chiral	C1	4	2	2	Wa-could be Diast	contains following chiral atom(s)C	NA	NA	7.6112	8.9144	16.092	101.407	92.005	108.638	1008.45	1.36813	C23 H18 O5,C2 H3 N1	(-)-8-benzoyl-5,7-dihydroxy-6-methyl-2-phenyl-2,3-dihydro-4H-1-benzopyran-4-one acetonitrile solvate	110.2 K	None	None	None	None	None	None	None	Jiwu Huang, Chuangjun Li, Jie Ma, Kailing Xu, Xinyi Chen, Jiandong Jiang, Dongming Zhang
EQUREO	ACHIRAL	+ achiral molecule	NO	NO	P1	1	TRUE	FALSE	3.61	0	0	0	No Chiral atom	0	0	0	0	0						2	1	1	NA	contains following chiral atom(s)No Chiral atom	NA	NA	7.2358	9.6653	9.8726	65.223	86.438	76.294	608.501	1.41226	C23 H21 Br1 O1 S1,C7 H8	(Sp,Ss)-5-Bromo-12-((4-methylphenyl)sulfinyl)tricyclo8.2.2.24,7hexadeca-1(12),4,6,10,13,15-hexaene toluene solvate	at 173 K	None	474-476 K	colorless	None	None	petrol/toluene	None	R.Parmar, M.P.Coles, P.B.Hitchcock, G.J.Rowlands
ERIVOS	CHIRAL	Enantiopure	NO	NO	P1	1	TRUE	FALSE	3.85	2	1	10	C	10	6	2	8	0	(2, SSSSR)	1	2	chiral	C1	2	2	2	Wa-could be Diast	contains following chiral atom(s)C	NA	NA	6.0589	9.963	12.954	69.641	82.555	78.631	717.148	1.26138	C15 H28 O4	5,6-bis(hydroxymethyl)-1,1,4a-trimethyldecahydronaphthalene-2,6-diol	273.1 K	None	None	None	None	None	None	None	Ning-Ning Yang, Qing-Yun Ma, Sheng-Zhuo Huang, Fan-Dong Kong, Hao-Fu Dai, Zhi-Fang Yu, You-Xing Zhao
ESEWUX	CHIRAL	Enantiopure	NO	NO	P1	1	TRUE	FALSE	3.95	2	1	2	C	2	2	0	2	0	(2, S)	1	2	chiral	C1	2	2	2	Wa-could be Diast	contains following chiral atom(s)C	NA	NA	5.6314	9.5256	12.3331	67.597	88.3	77.605	596.392	1.61576	C14 H12 Br1 N1 O1	6-bromo-3-phenyl-3,4-dihydro-2H-1,4-benzoxazine	100 K	None	None	colorless	None	None	None	None	Jian Zhang, Jun Wei, Wei-Yi Ding, Shaoyu Li, Shao-Hua Xiang, Bin Tan
ESIFAQ	CHIRAL	Enantiopure	NO	NO	P1	1	TRUE	FALSE	4.93	2	1	10	C	10	10	6	4	0	(2, RRSSR)	1	2	chiral	C1	2	2	2	Wa-could be Diast	contains following chiral atom(s)C	NA	NA	6.6976	10.441	13.719	86.124	81.359	77.426	925.121	1.3727	C19 H23 F1 O7	4-(2,2,7,7-tetramethyltetrahydro-2H,3aH,7H-bis1,3dioxolo4,5-b:4,5-dpyran-5-yl)methoxybenzoyl fluoride	100 K	None	None	colorless	None	None	None	None	L.Schuh, P.Muller, A.Torvisco, H.Stueger, T.M.Wrodnigg, M.Haas
ESIQOO	CHIRAL	Enantiopure	NO	NO	P1	1	TRUE	FALSE	4.01	1	1	1	C	1	1	0	1	0	(1, S)	1	1	chiral	C1	1	1	1	W2_enantiopure AU	contains following chiral atom(s)C	NA	NA	4.085	6.5169	13.3655	80.875	86.742	84.539	349.397	1.53157	C16 H12 F2 O5	(+)-7-((3,4-dimethyl-5-oxo-2,5-dihydrofuran-2-yl)oxy)-6,8-difluoro-4-methyl-2H-chromen-2-one	293 K	None	None	colorless	None	None	acetone/heptane	None	A.de S.Germain, G.Clave, M.-A.Badet-Denisot, J.-P.Pillot, D.Cornu, J.-P.Le Caer, M.Burger, F.Pelissier, P.Retailleau, C.Turnbull, S.Bonhomme, J.Chory, C.Rameau, F.-D.Boyer
ESOPIM	CHIRAL	Enantiopure	NO	NO	P1	1	TRUE	FALSE	3.91	2	1	6	C	6	6	0	6	0	(2, SSS)	1	2	chiral	C1	2	2	2	Wa-could be Diast	contains following chiral atom(s)C	NA	NA	9.0489	11.8543	14.1652	96.5484	99.1573	90.8419	1489.49	1.19014	C32 H43 N1 O4 Si1	trans-4-Benzyl-3-(2,2-di-t-butyl-7,8-dimethyl-9-phenyl-8,9-dihydro-1,3,2-dioxasilonin-4-yl)-1,3-oxazolidin-2-one	at 143 K	None	None	colorless	None	None	None	None	C.C.Ventocilla, K.A.Woerpel
ETAGEO	CHIRAL	Enantiopure	NO	NO	P1	1	TRUE	FALSE	2.73	2	1	8	C	8	8	8	0	0	(2, RRRR)	1	2	chiral	C1	2	2	2	Wa-could be Diast	contains following chiral atom(s)C	NA	NA	5.4048	13.6367	20.6903	71.195	85.372	85.751	1436.97	1.44825	C33 H26 N2 O9 S1	2-(benzoyloxy)methyl-5-(5-methyl-2,4-dioxo-3,4-dihydrothieno3,4-dpyrimidin-1(2H)-yl)oxolane-3,4-diyl dibenzoate	100.2 K	None	None	colorless	None	None	None	None	P.T.Ludford, Yao Li, Shenghua Yang, Y.Tor
ETEXAC	CHIRAL	Enantiopure	NO	NO	P1	1	TRUE	FALSE	3.85	2	1	4	C	4	2	2	2	0	(2, SR)	1	2	chiral	C1	2	2	2	Wa-could be Diast	contains following chiral atom(s)C	NA	NA	10.374	10.8633	13.2251	67.725	79.262	65.743	1256.6	1.40452	C26 H28 Cl2 N4 O4	(+)-cis-1-Acetyl-4-(4-(((2R,4S)-2-(2,4-dichlorophenyl)-2-(1H-imidazol-1-ylmethyl)-1,3-dioxolan-4-yl)methoxy)phenyl)piperazine	at 293 K	None	None	colorless	None	None	methanol/4-methyl-2-pentanone	None	O.M.Peeters, N.M.Blaton, J.G.Gerber, J.Gal
ETEXAC01	CHIRAL	Enantiopure	NO	NO	P1	1	TRUE	FALSE	4.59	2	1	4	C	4	2	2	2	0	(2, SR)	1	2	chiral	C1	2	2	2	Wa-could be Diast	contains following chiral atom(s)C	NA	NA	10.4215	10.846	13.2496	67.943	79.578	65.943	1266.77	1.39325	C26 H28 Cl2 N4 O4	(+)-cis-1-Acetyl-4-(4-(((2R,4S)-2-(2,4-dichlorophenyl)-2-(1H-imidazol-1-ylmethyl)-1,3-dioxolan-4-yl)methoxy)phenyl)piperazin	295 K	None	None	colorless	None	None	methanol	None	A.Perez-Benitez, I.Angel Nieto, S.Bernes
ETISUV	CHIRAL	Enantiopure	NO	NO	P1	1	TRUE	FALSE	4.65	1	1	4	C	4	4	1	3	0	(1, RSSS)	1	1	chiral	C1	1	1	1	W1_enantiopure AU	contains following chiral atom(s)C	NA	NA	4.875	5.306	10.669	101.486	92.884	90.339	270.067	1.63722	C7 H14 N4 O5 S1	4-Amino-3-(1,2,3,4,5-pentahydroxypentyl)-1,2,4-1H-triazole-5(4H)-thione	at 298 K	None	473-475 K	colorless	None	None	aqueous ethanol	None	Li-Xue Zhang, An-Jiang Zhang, Xin-Xiang Lei, Kai-Huang Zou, S.W.Ng
EVARUP	CHIRAL	Enantiopure + achiral molecule	NO	NO	P1	1	TRUE	FALSE	3.11	1	1	9	C	9	6	3	6	0	(1, SSSRRSRSS)	1	1	chiral	C1	4	1	1	W1_enantiopure AU	contains following chiral atom(s)C	NA	NA	5.842	7.3366	12.7922	74.56	83.091	68.93	492.973	1.27494	C19 H32 O4,3(H2 O1)	Androstane-3Î²,5Î±,6Î²,17Î²-tetrol trihydrate	at 293 K	None	547 K	colorless	None	None	None	None	L.C.R.Andrade, M.J.B.M.d.Almeida, J.A.Paixao, J.F.S.Carvalho, M.L.Sa e Melo
EVAXOR	CHIRAL	Enantiopure	NO	NO	P1	1	TRUE	FALSE	3.34	2	1	2	C	2	0	2	0	0	(2, R)	1	2	chiral	C1	2	2	2	Wa-could be Diast	contains following chiral atom(s)C	NA	NA	9.849	9.9955	10.0346	113.883	100.76	111.697	770.697	1.49192	C17 H16 Br1 N1 O2	N-(4-bromophenyl)-2-(3-methyl-2,3-dihydro-1-benzofuran-3-yl)acetamide	296 K	None	None	colorless	None	None	None	None	A.Cerveri, R.Giovanelli, D.Sella, R.Pedrazzani, M.Monari, O.N.Faza, C.S.Lopez, M.Bandini
EVIDOC	CHIRAL	Enantiopure	NO	NO	P1	1	TRUE	FALSE	4.24	1	1	4	C	4	3	3	1	0	(1, RSRR)	1	1	chiral	C1	1	1	1	W1_enantiopure AU	contains following chiral atom(s)C	NA	NA	6.8037	7.7391	11.9131	84.539	74.277	78.323	590.77	1.26651	C24 H34 O6 S1	(8aR,SS)-Dimethyl 3,5,6,7,8,8a-hexahydro-4-(((1S)-exo-2-hydroxy-7,7-dimethylbicyclo(2.2.1)heptan-1-yl)methylsulfinyl)-1,2-naphthalenedicarboxylate	at 298 K	None	None	colorless	None	None	diethyl ether/petrol	None	G.Bruno, A.Rotondo, F.Nicolo, M.C.Aversa, A.Barattucci, P.Bonaccorsi, P.Giannetto
EVOREM	CHIRAL	Enantiopure + achiral molecule	NO	NO	P1	1	TRUE	FALSE	4.17	4	1	24	C	24	16	8	16	0	(4, RSRSSS)	1	4	chiral	C1	6	4	4	Wa-could be Diast	contains following chiral atom(s)C	NA	NA	6.8086	10.5682	32.5223	80.7761	87.7492	74.1122	2221.61	1.26631	C25 H30 F1 N3 O1,0.5(C1 H4 O1)	2-(4-Fluorophenyl)-(1,2,3)triazolo(4,5:16,17)androst-5-en-3Î²-ol methanol solvate	at 160 K	None	487 K	pale yellow	None	None	methanol	None	S.Thamotharan, V.Parthasarathi, R.Gupta, D.P.Jindal, A.Linden
EVOYEW	CHIRAL	Enantiopure	NO	NO	P1	1	TRUE	FALSE	2.71	1	1	2	C	2	2	0	2	0	(1, SS)	1	1	chiral	C1	1	1	1	W1_enantiopure AU	contains following chiral atom(s)C	NA	NA	6.2855	7.5767	8.7197	88.555	74.561	73.387	382.985	1.41068	C19 H19 N1 O4	1-(2,7-dihydroxy-1-methoxy-4,5,6a,7-tetrahydro-6H-dibenzode,gquinolin-6-yl)ethan-1-one	100.0 K	None	542.4-543.4 K	colorless	None	None	None	None	Yuan-kun Zheng, Bao-jun Su, Ya-qi Wang, Heng-shan Wang, Hai-bing Liao, Dong Liang
EVUQAQ	CHIRAL	Enantiopure + achiral molecule	NO	NO	P1	1	TRUE	FALSE	4.48	2	1	12	C	12	8	8	4	0	(2, SRRSRR)	1	2	chiral	C2	5	2	2	Wa-could be Diast	contains following chiral atom(s)C	NA	NA	11.938	12.782	12.925	118.386	92.327	114.237	1512.3	1.37619	C32 H34 O10,1.5(C1 H4 O1)	1,1,5,5-tetrahydroxy-6,6-dimethoxy-3,3,10a,10a-tetramethyl-5,5,6,6,7,7,10a,10a-octahydro-9H,9H-4,4-bixanthene-9,9-dione methanol solvate	100 K	None	None	light yellow	None	None	None	None	K.Sadorn, S.Saepua, N.Boonyuen, Wilunda Choowong, P.Rachtawee, P.Pittayakhajonwut
EWIMIG	CHIRAL	Enantiopure	NO	NO	P1	1	TRUE	FALSE	3.39	1	1	3	C	3	2	2	1	0	(1, RSR)	1	1	chiral	C1	1	1	1	W1_enantiopure AU	contains following chiral atom(s)C	NA	NA	5.1	10.18	11.76	73.29	72.27	79.44	553.924	1.37442	C27 H23 F1 N2 O4	Î±-Cyano-Î±-fluoro-p-tolylacetic acid N-benzyloxycarbonyl-1-amino-2-indanyl ester	at 150.2 K	None	None	colorless	None	None	hexane/chloroform	None	T.Fujiwara, M.Sasaki, K.Omata, C.Kabuto, K.Kabuto, Y.Takeuchi
EWIVOX	CHIRAL	Enantiopure + achiral molecule	NO	NO	P1	1	TRUE	FALSE	3.42	1	1	5	C	5	5	2	3	0	(1, SSRSR)	1	1	chiral	C1	2	1	1	W1_enantiopure AU	contains following chiral atom(s)C	NA	NA	6.3082	7.5108	8.11	88.911	85.044	77.888	374.29	1.27026	C14 H20 O5,H2 O1	2,13-dihydroxy-7-methyl-6,15-dioxabicyclo12.1.0pentadeca-3,11-dien-5-one monohydrate	120 K	None	None	colorless	None	None	None	None	Shuai Liu, Haofu Dai, G.Makhloufi, Christian Heering, C.Janiak, R.Hartmann, A.Mandi, T.Kurtan, W.E.G.Muller, M.U.Kassack, Wenhan Lin, Zhen Liu, P.Proksch
EXADAL	CHIRAL	Enantiopure	NO	NO	P1	1	TRUE	FALSE	2.91	2	1	4	C	4	4	2	2	0	(2, RS)	1	2	chiral	C1	2	2	2	Wa-could be Diast	contains following chiral atom(s)C	NA	NA	10.1717	10.6586	13.16	74.065	82.299	66.348	1256.23	1.22831	C30 H28 N2 O1 S1	2-(dibenzylamino)(phenyl)methyl-2,3-dihydro-1,5-benzothiazepin-4(5H)-one	299 K	None	None	colorless	None	None	ether / dichloromethane	None	Wei Yang, Maoping Pu, Xiaobin Lin, Min Chen, Yanji Song, Xiaohua Liu, Yun-Dong Wu, Xiaoming Feng
EXAFUF	CHIRAL	Enantiopure	NO	NO	P1	1	TRUE	FALSE	3.42	1	1	5	C	5	5	3	2	0	(1, RSRRS)	1	1	chiral	C1	1	1	1	W1_enantiopure AU	contains following chiral atom(s)C	NA	NA	4.8775	6.6038	12.1329	97.63	99.32	99.09	375.736	1.47315	C17 H19 N1 O6	1-(((2,4,5-Trihydroxy-6-(hydroxymethyl)tetrahydro-2H-pyran-3-yl)iminio)methyl)naphthalen-2-olate	at 150 K	None	None	yellow	None	None	None	None	A.Mitra, V.K.Hinge, A.Mittal, S.Bhakta, P.Guionneau, C.P.Rao
EXAFUF01	CHIRAL	Enantiopure	NO	NO	P1	1	TRUE	FALSE	2.48	1	1	5	C	5	5	3	2	0	(1, RSRRS)	1	1	chiral	C1	1	1	1	W1_enantiopure AU	contains following chiral atom(s)C	NA	NA	4.86457	6.592	12.1222	97.7233	99.5183	98.9733	373.528	1.48186	C17 H19 N1 O6	1-({2,4,5-trihydroxy-6-(hydroxymethyl)oxan-3-yliminio}methyl)naphthalen-2-olate	100.1 K	None	None	colorless	None	None	None	None	G.Schaper, M.Wenzel, F.Hennersdorf, L.F.Lindoy, J.J.Weigand
EXIWAM	CHIRAL	Enantiopure	NO	NO	P1	1	TRUE	FALSE	4.05	1	1	13	C	13	8	7	6	0	(1, SRRRSRSSRRRSS)	1	1	chiral	C1	1	1	1	W1_enantiopure AU	contains following chiral atom(s)C	NA	NA	6.2374	9.5938	11.351	112.81	96.49	93.13	618.513	1.31179	C28 H40 O7	5Î±,14Î±,20R-trihydroxy-1-oxo-6Î±,7Î±-epoxy-22R-witha-2-enolide	290 K	None	528 K	colorless	None	None	None	None	R.Y.Okmanov, M.M.Makhmudova, I.D.Bobaev, B.Tashkhodjaev
EXOGEF	MESO		NO	NO	P1	1	TRUE	FALSE	3.6	2	1	14	C	14	12	8	6	0	(1, RRRSRSS), (1, RRRRSSS)	2	2	diast, MESO	C1	2	2	2	DIAST-1, contains DIAST	contains following chiral atom(s)C	NA	NA	10.7617	11.3466	11.4673	77.917	74.085	63.775	1201.65	1.20662	C30 H32 N2 O1	N-(1-(2,8-diphenyladamantan-1-yl)ethyl)pyridine-2-carboxamide	170 K	None	None	colorless	None	None	dichloromethane/n-Hexane	None	Zhoulong Fan, Shiqi Shu, Jiabin Ni, Qizheng Yao, Ao Zhang
EXORER	ACHIRAL	+ achiral molecule	NO	NO	P1	1	TRUE	FALSE	5	0	0	0	No Chiral atom	0	0	0	0	0						1	2	2	NA	contains following chiral atom(s)No Chiral atom	NA	NA	8.448	11.056	7.44	82.87	115.34	108.92	594.024	0.70519	C15 H12 N2 O2	2-2-(methylamino)phenyl-4H-3,1-benzoxazin-4-one	None	None	449 K	yellow	None	None	None	No coordinates have been deposited at CCDC for this structure; no study temperature has been reported.	O.S.Filipenko, L.L.Alimova, L.O.Atovmyan, B.M.Bolotin
EXUCIJ	CHIRAL	Enantiopure	NO	NO	P1	1	TRUE	FALSE	3.87	2	1	2	C	2	2	2	0	0	(2, R)	1	2	chiral	C1	2	2	2	Wa-could be Diast	contains following chiral atom(s)C	NA	NA	6.0335	9.4122	18.7857	81.175	89.271	80.703	1040.26	1.19083	C23 H32 O4	3,6-Dihydroxy-2-(11-phenylundecanoyl)cyclohex-2-en-1-one	at 243 K	None	None	colorless	None	None	None	The hydrogen atom between O6A and O7A is described as not being strictly covalently bonded to either of the oxygen atoms and has been suppressed	E.Castro, L.E.Cuca Suarez, P.Siengalewicz, R.Gutmann, G.Czermak, P.Brueggeller
EYASIG	CHIRAL	Enantiopure + achiral molecule	NO	NO	P1	1	TRUE	FALSE	4.65	2	1	6	C	6	6	4	2	0	(2, SRR)	1	2	chiral	C1	3	2	2	Wa-could be Diast	contains following chiral atom(s)C	NA	NA	7.431	9.534	21.456	79.81	87.75	68	1386.57	1.38679	C28 H28 N2 O9,0.5(C1 H2 Cl2)	(1R,2S,3R)-2-Methyl-3-(1-phenylethoxy)penta-1,5-diyl bis(4-nitrobenzoate) dichloromethane solvate	at 140 K	None	376-377 K	colorless	None	None	pentane/dichloromethane	None	M.Turks, F.Fonquerne, P.Vogel
EYIPIO	CHIRAL	Enantiopure + achiral molecule	NO	NO	P1	1	TRUE	FALSE	4.54	2	1	4	C	4	2	2	2	0	(2, SR)	1	2	chiral	C1	4	2	2	Wa-could be Diast	contains following chiral atom(s)C	NA	NA	7.838	10.335	13.23	84.6	79.18	69.04	982.575	1.45248	C16 H18 N6 O1,C1 H1 Cl3	3-3-methyl-6-(7H-pyrrolo2,3-dpyrimidin-4-yl)-1,6-diazaspiro3.4octan-1-yl-3-oxopropanenitrile chloroform solvate	100 K	None	None	colorless	None	None	None	None	S.Noji, Y.Hara, T.Miura, H.Yamanaka, K.Maeda, A.Hori, H.Yamamoto, Shingo Obika, M.Inoue, Y.Hase, T.Orita, S.Doi, T.Adachi, A.Tanimoto, C.Oki, Y.Kimoto, Y.Ogawa, T.Negoro, H.Hashimoto, M.Shiozaki
EYIVAM	CHIRAL	Enantiopure	NO	NO	P1	1	TRUE	FALSE	2.82	1	1	1	C	1	1	0	1	0	(1, S)	1	1	chiral	C1	1	1	1	W2_enantiopure AU	contains following chiral atom(s)C	NA	NA	7.6	7.9257	8.3564	68.093	89.559	65.504	418.478	1.60394	C17 H14 Br1 N3 O4	5-acetyl-8-bromo-4-(4-nitrophenyl)-1,3,4,5-tetrahydro-2H-1,5-benzodiazepin-2-one	173 K	None	None	colorless	None	None	None	None	M.Bolte, E.Merino, Magnus Rueping
EYOLAG	CHIRAL	Enantiopure	NO	NO	P1	1	TRUE	FALSE	4.65	1	1	4	C	4	4	1	3	0	(1, SRSS)	1	1	chiral	C1	1	1	1	W1_enantiopure AU	contains following chiral atom(s)C	NA	NA	6.2724	8.1395	11.915	99.035	95.226	96.713	592.919	1.22823	C26 H34 N2 O4	1,4-bis(benzyloxy)-3,6-di-sec-butylpiperazine-2,5-dione	at 100 K	None	None	colorless	None	None	None	None	D.W.Lin, T.Masuda, M.B.Biskup, J.D.Nelson, P.S.Baran
EYUDAF	ACHIRAL	+ achiral molecule	NO	NO	P1	1	TRUE	FALSE	4.61	0	0	0	No Chiral atom	0	0	0	0	0						2	2	2	NA	contains following chiral atom(s)No Chiral atom	NA	NA	11.6001	11.8069	14.05	99.059	102.128	118.173	1583.23	1.39893	C38 H26 N4 S4	4,4-dimethyl-2,2,2,2-tetraphenyl-5,5:4,4:5,5-quater-1,3-thiazole	100 K	None	None	colorless	None	None	None	None	G.Gavrel, A.Leaustic, R.Guillot, Pei Yu
EYUJIT	CHIRAL	Enantiopure + achiral molecule	NO	NO	P1	1	TRUE	FALSE	3.67	3	1	15	C	15	12	12	3	0	(3, SRRRR)	1	3	chiral	C1	4	3	3	Wa-could be Diast	contains following chiral atom(s)C	NA	NA	5.7018	10.7524	13.6054	79.318	81.754	87.699	811.113	1.4754	C10 H15 F1 O5,0.33(H2 O1)	(7-fluoro-4,4-dimethyl-3,5,10,11-tetraoxatricyclo6.2.1.02,6undecan-7-yl)methanol hydrate	100 K	None	None	colorless	None	None	None	None	M.Schalli, M.Thonhofer, A.Wolfsgruber, H.Weber, R.Fischer, R.Saf, A.E.Stutz
EYUJOZ	CHIRAL	Enantiopure	NO	NO	P1	1	TRUE	FALSE	4.64	2	1	8	C	8	6	6	2	0	(2, RRRS)	1	2	chiral	C1	2	2	2	Wa-could be Diast	contains following chiral atom(s)C	NA	NA	11.1076	11.5697	12.9357	76.779	71.027	89.411	1526.69	1.24144	C36 H39 F1 O5	3,4,5-tris(benzyloxy)-2-((benzyloxy)methyl)-2-fluorohept-6-en-1-ol	100 K	None	69-71 deg.C	colorless	None	None	None	None	M.Schalli, M.Thonhofer, A.Wolfsgruber, H.Weber, R.Fischer, R.Saf, A.E.Stutz
EYUMIX	CHIRAL	Enantiopure	NO	NO	P1	1	TRUE	FALSE	2.71	2	1	4	C	4	4	2	2	0	(2, SR)	1	2	chiral	C1	2	2	2	Wa-could be Diast	contains following chiral atom(s)C	NA	NA	5.8434	9.9102	17.9362	82.413	86.455	89.466	1027.61	1.22632	C23 H25 N1 O4	1-ethyl 5-methyl 4-methylidene-N-(2-methylphenyl)methylidene-3-phenylglutamate	170 K	None	None	colorless	None	None	None	None	Yimin Hu, Zhengyang Yan, Wangyu Shi, Jianning Liao, Min Liu, Ting Pan, Wei Wang, Yongjun Wu, Xianghong Hao, Hongchao Guo
EZAKEY	CHIRAL	Enantiopure	NO	NO	P1	1	TRUE	FALSE	4.23	2	1	4	C	4	4	0	4	0	(2, SS)	1	2	chiral	C1	2	2	2	Wa-could be Diast	contains following chiral atom(s)C	NA	NA	10.0042	10.9449	12.175	108.288	96.834	100.23	1223.67	1.18922	C27 H32 B2 N2 O2	2-1-phenyl-1-(4,4,5,5-tetramethyl-1,3,2-dioxaborolan-2-yl)pent-3-en-2-yl-2,3-dihydro-1H-naphtho1,8-de1,3,2diazaborinine	123 K	None	None	colorless	None	None	n-pentane / dichloromethane	None	S.K.Dorn, A.E.Tharp, M.Kevin Brown
EZIHEC	CHIRAL	Enantiopure + achiral molecule	NO	NO	P1	1	TRUE	FALSE	3.79	1	1	10	C	10	4	4	6	0	(1, RSSSSSRRSR)	1	1	chiral	C1	2	1	1	W1_enantiopure AU	contains following chiral atom(s)C	NA	NA	6.3429	7.2295	22.835	86.897	87.866	68.166	970.416	1.24912	C43 H60 O7,C2 H3 N1	(2,4a,6a,8a,9,12b,14a-heptamethyl-10-oxodocosahydropicen-2-yl)methyl 3-(3,4-diacetoxyphenyl)acrylate acetonitrile solvate	170 K	None	None	colorless	None	None	acetonitrile	None	Jin-Long Li, Lei Wu, Jian Wu, Hong-Xuan Feng, Hong-Min Wang, Yan Fu, Ru-Jun Zhang, Hai-Yan Zhang, Wei-Min Zhao
EZIRAH	CHIRAL	Enantiopure + achiral molecule	NO	NO	P1	1	TRUE	FALSE	4.52	2	1	22	C	22	18	6	16	0	(2, RSSSRSSRSSS)	1	2	chiral	C1	3	2	2	Wa-could be Diast	contains following chiral atom(s)C	NA	NA	6.0445	12.4052	16.8601	108.671	97.047	94.213	1180.07	1.22873	C25 H40 O5,0.5(C1 H4 O1)	(20R)-2Î±,3Î±,20-Trihydroxy-5Î±-pregnane 16Î²-methacrylate methanol solvate	at 173 K	None	479-480 K	colorless	None	None	None	None	Shi-Biao Wu, Qiu-Ying Bao, Wen-Xuan Wang, Yun Zhao, Gang Xia, Zheng Zhao, Huaqiang Zeng, Jin-Feng Hu
EZUFUA	CHIRAL	Enantiopure	NO	NO	P1	1	TRUE	FALSE	4.68	1	1	2	C	2	2	2	0	0	(1, RR)	1	1	chiral	C1	1	1	1	W1_enantiopure AU	contains following chiral atom(s)C	NA	NA	4.846	5.949	19.861	85	88.23	68.31	530.005	1.16384	C18 H33 N3 O5	1-Cyclohexyl-4,9,13-trimethyl-2,7,12-trioxo-1,6,11-triaza-5,10-dioxatetradecane	at 301 K	None	462-463 K	colorless	None	None	None	None	Dan Yang, Yu-Hui Zhang, Bing Li, Dan-Wei Zhang, J.Chun-Yu Chan, Nian-Yong Zhu, Shi-Wei Luo, Yun-Dong Wu
FABDIY	ACHIRAL	+ achiral molecule	NO	NO	P1	1	TRUE	FALSE	3.44	0	0	0	No Chiral atom	0	0	0	0	0						2	2	2	NA	contains following chiral atom(s)No Chiral atom	NA	NA	8.1107	10.3066	14.4065	71.684	89.752	77.691	1114.45	1.34248	C27 H25 F3 N2 O1	(Ra)-1-2-(N,N-Dimethylamino)methyl-6-(trifluoromethyl)phenyl-1H-pyrrole-2-diphenylmethanol	93 K	None	444 K	colorless	None	None	acetone/chloroform	None	F.Faigl, SZ Deak, ZS Erdelyi, T.Holczbauer, M.Czugler, M.Nyerges, B.Matravolgyi
FABWUD	ACHIRAL	+ achiral molecule	NO	NO	P1	1	TRUE	FALSE	4.38	0	0	0	No Chiral atom	0	0	0	0	0						2	2	2	NA	contains following chiral atom(s)No Chiral atom	NA	NA	4.115	11.24	15.93	100.51	93.72	91.22	722.504	2.03862	C16 H9 Br1 Cl1 I1	6-bromo-2-(4-chlorophenyl)-3-iodonaphthalene	296 K	None	None	colorless	None	None	None	None	D.Lehnherr, J.M.Alzola, E.B.Lobkovsky, W.R.Dichtel
FABYUC10	CHIRAL	Enantiopure	NO	NO	P1	1	TRUE	FALSE	4.8	2	1	10	C	10	10	6	4	0	(2, SRSRR)	1	2	chiral	C1	2	2	2	Wa-could be Diast	contains following chiral atom(s)C	NA	NA	7.679	9.933	11.458	89.31	72.83	86.49	833.432	1.39585	C14 H19 F1 O9	1,3,4,6-Tetra-O-acetyl-2-deoxy-2-fluoro-Î²-D-galactopyranoside	None	None	None	None	None	None	None	None	T.Srikrishnan, S.H.An
FAHLIN	CHIRAL	Enantiopure	NO	NO	P1	1	TRUE	FALSE	2.25	1	1	1	C	1	1	1	0	0	(1, R)	1	1	chiral	C1	1	1	1	W2_enantiopure AU	contains following chiral atom(s)C	NA	NA	5.2561	6.2411	12.379	83.105	86.831	66.23	368.933	1.36104	C16 H18 N2 O2 S1	(-)-2-benzyl-5-phenyl-1,2,6-thiadiazinane-1,1-dione	123 K	None	None	colorless	None	None	None	None	Kai Lang, Chaoqun Li, I.Kim, X.Peter Zhang
FAHYOG	CHIRAL	Enantiopure	NO	NO	P1	1	TRUE	FALSE	1.8	4	1	8	C	8	4	8	0	0	(4, RR)	1	4	chiral	C1	4	4	4	Wa-could be Diast	contains following chiral atom(s)C	NA	NA	9.4098	9.5444	17.9993	88.276	84.563	71.544	1526.49	1.49343	C17 H15 Br1 N2 O1	(1R,2aR)-1-(4-bromophenyl)-2a-methyl-2,2a-dihydro-1H-azeto1,2-aquinoxalin-3(4H)-one	100 K	None	469-472 K	colorless	None	None	ethanol	None	Xinyao Li, J.Grokopf, C.Jandl, T.Bach
FAMDUS	CHIRAL	Enantiopure	NO	NO	P1	1	TRUE	FALSE	3.87	1	1	3	C	3	3	1	2	0	(1, RSS)	1	1	chiral	C1	1	1	1	W1_enantiopure AU	contains following chiral atom(s)C	NA	NA	5.79	5.945	11.884	95.75	95.45	117.8	355.334	1.2326	C12 H22 Cl1 N1 O3	(4S)-3-((2S,3R)-2-Chloro-3-hydroxy-4-methylpentanoyl)-4-(1-methylethyl)oxazolidine	at 273 K	None	None	None	None	None	None	None	D.S.Eggleston, A.Abdel-Magid, L.N.Pridgen, I.Lantos
FAMZIG	CHIRAL	Enantiopure	NO	NO	P1	1	TRUE	FALSE	1.94	2	1	4	C	4	2	2	2	0	(2, SR)	1	2	chiral	C1	2	2	2	Wa-could be Diast	contains following chiral atom(s)C	NA	NA	8.7754	8.8984	12.8772	99.2233	96.0361	91.197	986.309	1.58026	C23 H20 I1 N1 O2	trans-N-(4-iodophenyl)-2-(2-methyl-3-phenyl-2,3-dihydro-1-benzofuran-2-yl)acetamide	100 K	None	None	colorless	None	None	None	None	S.N.Dishman, C.J.Laconsay, J.C.Fettinger, D.J.Tantillo, J.T.Shaw
FAMZOM	CHIRAL	Enantiopure	NO	NO	P1	1	TRUE	FALSE	2.89	2	1	4	C	4	2	2	2	0	(2, RS)	1	2	chiral	C1	2	2	2	Wa-could be Diast	contains following chiral atom(s)C	NA	NA	6.3151	11.198	17.7567	85.4422	85.449	86.8128	1246.24	1.29399	C33 H27 N1 O3	1-hydroxy-N-{4-(2-methyl-2-phenyl-2,3-dihydro-1-benzofuran-3-yl)phenylmethyl}naphthalene-2-carboxamide	90 K	None	None	colorless	None	None	None	None	S.N.Dishman, C.J.Laconsay, J.C.Fettinger, D.J.Tantillo, J.T.Shaw
FAPGIQ	CHIRAL	Enantiopure	NO	NO	P1	1	TRUE	FALSE	4.73	2	1	4	C	4	4	2	2	0	(2, RS)	1	2	chiral	C1	2	2	2	Wa-could be Diast	contains following chiral atom(s)C	NA	NA	7.2654	11.7175	12.5932	109.218	105.54	101.236	926.933	1.32355	C21 H23 N1 O5	methyl 1,4-bis(4-methoxyphenyl)-2-oxopiperidine-3-carboxylate	100 K	None	None	colorless	None	None	None	None	Congcong Yin, Yingmin Pan, Xumu Zhang, Qin Yin
FAPHOX	CHIRAL	Enantiopure	NO	NO	P1	1	TRUE	FALSE	2.89	1	1	3	C	3	3	0	3	0	(1, SSS)	1	1	chiral	C1	1	1	1	W1_enantiopure AU	contains following chiral atom(s)C	NA	NA	7.36481	8.6916	10.4091	95.706	101.335	111.299	597.952	1.31759	C23 H26 N2 O9	3,5-dimethyl-1-(2,2,5-trimethyl-4-oxo-2H,4H-1,3-dioxin-6-yl)hepta-1,6-dien-4-yl 3,5-dinitrobenzoate	100.0 K	None	None	colorless	None	None	None	None	T.T.Schempp, M.J.Krische
FAQMAL	ACHIRAL	+ achiral molecule	NO	NO	P1	1	TRUE	FALSE	4.39	0	0	0	No Chiral atom	0	0	0	0	0						3	2	2	NA	contains following chiral atom(s)No Chiral atom	NA	NA	10.089	11.16	13.871	100.18	108.07	95.47	1442.44	1.36381	C30 H29 O3 P1 S2,0.5(C1 H1 Cl3)	3,4:8,9:13,14-Tribenzo-1-phenyl-1-phospha-6,11-dithiacyclopentadecane-1,6,11-trioxide chloroform solvate	at 108 K	None	above 225deg.C(dec.)	colorless	None	None	chloroform/hexane	None	S.K.Holmgren, P.B.Savage, J.M.Desper, K.D.Schladetzky, D.R.Powell, S.H.Gellman
FARNUI	DIASTEREOMER		NO	NO	P1	1	TRUE	FALSE	3.3	2	1	6	C	6	4	3	3	0	(1, RSR), (1, SSR)	2	2	diast	C1	2	2	2	DIAST-1, contains DIAST	contains following chiral atom(s)C	NA	NA	7.957	9.4	10.711	106.514	98.163	104.922	721.89	1.2024	C15 H23 N3 O1	1,8a;8b,3a-Didehydro-8Î²-hydroxyptilocaulin 1,8a;8b,3a-didehydro-8Î±-hydroxyptilocaulin	at 102 K	None	None	colorless	None	None	methanol	None	Hui-ming Hua, Jiangnan Peng, F.R.Fronczek, M.Kelly, M.T.Hamann
FATXUT	CHIRAL	Enantiopure	NO	NO	P1	1	TRUE	FALSE	4.5	1	1	4	C	4	4	3	1	0	(1, RRSR)	1	1	chiral	C1	1	1	1	W1_enantiopure AU	contains following chiral atom(s)C	NA	NA	4.82	5.083	14.334	96.91	83.1	97.12	343.965	1.37729	C13 H19 N1 O6	N-Benzyl-D-gluconamide	None	None	None	colorless	None	None	None	None	Y.Oddon, N.Darbon-Meyssonnier, J.P.Reboul, G.Pepe, E.Decoster, A.A.Pavia
FAVSUQ	CHIRAL	Enantiopure	NO	NO	P1	1	TRUE	FALSE	3.5	1	1	5	C	5	4	3	2	0	(1, RSRRS)	1	1	chiral	C1	1	1	1	W1_enantiopure AU	contains following chiral atom(s)C	NA	NA	8.204	8.459	8.678	86.22	95.91	118.69	525.395	1.36676	C17 H24 N2 O9 S1	(2S)-3-Acetylimino-1,4-thiazine-2-spiro-1-(3,4,6-tri-O-acetyl-1-deoxy-D-galactopyranose)	None	None	441 K	colorless	None	None	None	C11 C13 is given as 1.432; we calculate 1.481	L.Somsak, G.Batta, I.Farkas, L.Parkanyi, A.Kalman, A.Somogyi
FAWMAU	ACHIRAL	+ achiral molecule	NO	NO	P1	1	TRUE	FALSE	3.74	0	0	0	No Chiral atom	0	0	0	0	0						1	1	1	NA	contains following chiral atom(s)No Chiral atom	NA	NA	7.2895	9.234	11.6572	100.23	102.319	96.3662	745.322	1.36982	C40 H30 O3 Si2	tetrakis(naphthalen-1-yl)disiloxane-1,3-diol	90 K	None	None	colorless	None	None	None	None	K.M.Diemoz, J.E.Hein, S.O.Wilson, J.C.Fettinger, A.K.Franz
FAWNID	CHIRAL	Enantiopure	NO	NO	P1	1	TRUE	FALSE	4.03	2	1	2	C	2	0	0	2	0	(2, S)	1	2	chiral	C1	2	2	2	Wa-could be Diast	contains following chiral atom(s)C	NA	NA	6.5282	14.5999	14.9551	111.076	99.361	92.468	1304.31	1.28215	C27 H29 N5 O5	4-(t-butoxycarbonyl)amino-3,3-dimethyl-5-oxo-1,1-diphenyl4,5-dihydro-1H,1H-4,4-bipyrazole-5-yl acetate	120.0 K	None	None	colorless	None	None	None	None	Pankaj Chauhan, S.Mahajan, Ugur Kaya, A.Peuronen, K.Rissanen, D.Enders
FAZQAY	CHIRAL	Enantiopure	NO	NO	P1	1	TRUE	FALSE	3.38	1	1	2	C	2	2	2	0	0	(1, RR)	1	1	chiral	C1	1	1	1	W1_enantiopure AU	contains following chiral atom(s)C	NA	NA	9.13	9.181	9.732	80.174	72.356	62.913	691.607	1.29557	C33 H34 N1 O4 P1	4-Dimethylamino-9,9-dimethyl-2,2,6,6-tetraphenyl-3,5,8,10-tetraoxa-4-phosphabicyclo(5.3.0)decane	at 130 K	None	None	colorless	None	None	None	None	E.Keller, J.Maurer, R.Naasz, T.Schader, A.Meetsma, B.L.Feringa
FEDBAS	CHIRAL	Enantiopure + achiral molecule	NO	NO	P1	1	TRUE	FALSE	4.49	1	1	7	C	7	5	3	4	0	(1, SRSSSRR)	1	1	chiral	C1	2	1	1	W1_enantiopure AU	contains following chiral atom(s)C	NA	NA	6.589	8.452	10.757	108.41	96.9	92.79	561.893	1.23088	C21 H34 O7,H2 O1	3Î²,8Î±,9Î²-Triacetoxy-4Î±-hydroxy-7-eÏ€-eudesmane monohydrate	at 293 K	None	None	colorless	None	None	hexane/methanol	None	A.Garcia-Granados, M.C.Gutierrez, A.Martinez, F.Rivas
FEFNIO	CHIRAL	Enantiopure	NO	NO	P1	1	TRUE	FALSE	4.5	2	1	2	C	2	2	0	2	0	(2, S)	1	2	chiral	C1	2	2	2	Wa-could be Diast	contains following chiral atom(s)C	NA	NA	6.2384	9.8255	12.5432	69.344	78.054	79.396	698.642	1.22793	C15 H18 N2 O2	3-benzylidene-6-isobutylpiperazine-2,5-dione	at 293 K	None	None	colorless	None	None	methanol/dioxane	None	A.Bagaria, S.Ramakumar, M.Gupta, V.S.Chauhan
FEFZAT	CHIRAL	Enantiopure	NO	NO	P1	1	TRUE	FALSE	3.42	1	1	1	C	1	1	0	1	0	(1, S)	1	1	chiral	C1	1	1	1	W2_enantiopure AU	contains following chiral atom(s)C	NA	NA	6.006	6.8782	7.9717	90.202	98.272	107.193	310.956	1.21908	C11 H20 N2 O3	(4S)-2,2-dimethyl-4-(2-methylpropyl)-5-oxoimidazolidin-3-ium-1-ylacetate	at 298 K	None	None	colorless	None	None	None	None	T.Kiyotani, Y.Sugawara
FEJVUN	CHIRAL	Enantiopure	NO	NO	P1	1	TRUE	FALSE	3.05	2	1	2	C	2	2	0	2	0	(2, S)	1	2	chiral	C1	2	2	2	Wa-could be Diast	contains following chiral atom(s)C	NA	NA	9.548	10.3456	10.9685	111.168	94.1583	115.339	879.392	1.47015	C20 H21 Br1 O3	2-(6-Hydroxy-2,3-dihydro-1H-inden-5-yl)butyl 4-bromobenzoate	at 100 K	None	None	white	None	None	None	None	L.Nachbauer, R.Bruckner
FEKJOW	CHIRAL	Enantiopure	NO	NO	P1	1	TRUE	FALSE	3.17	2	1	2	C	2	0	0	2	0	(2, S)	1	2	chiral	C1	2	2	2	Wa-could be Diast	contains following chiral atom(s)C	NA	NA	9.7122	11.3901	11.8861	71.609	74.856	65.61	1123.24	1.33195	C21 H27 N2 O5 P1 S1	Di-isopropyl (cyano(((4-methylphenyl)sulfonyl)amino)-phenylmethyl)phosphonate	at 100 K	None	None	colorless	None	None	None	None	J.Vicario, J.M.Ezpeleta, F.Palacios
FELMOB	CHIRAL	Enantiopure	NO	NO	P1	1	TRUE	FALSE	3.2	1	1	1	C	1	1	0	1	0	(1, S)	1	1	chiral	C1	1	1	1	W2_enantiopure AU	contains following chiral atom(s)C	NA	NA	6.2002	9.8546	12.384	99.376	97.466	99.562	726.539	1.18313	C28 H43 N3 O6	methyl N-((1-(((t-butoxycarbonyl)amino)methyl)cyclohexyl)acetyl)-2-methylalanylphenylalaninate	150 K	None	None	colorless	None	None	None	None	M.Konda, S.Bhowmik, S.M.Mobin, S.Biswas, A.K.Das
FENTIB	CHIRAL	Enantiopure	NO	NO	P1	1	TRUE	FALSE	3.3	1	1	5	C	5	5	3	2	0	(1, RSRRS)	1	1	chiral	C1	1	1	1	W1_enantiopure AU	contains following chiral atom(s)C	NA	NA	6.168	10.085	12.663	105.21	100.66	105.77	703.083	1.30725	C28 H38 Br1 F1 O5	15-Fluoro-15-desoxy-11-eÏ€-prostaglandin F2Î± p-bromo-phenacyl ester	None	None	None	colorless	None	None	None	Coords of H14 and H23 appear to be in error. These atoms have been deleted. x(C19) should be -0.0704,21 not 0.0704,21	N.V.Nazimova, V.I.Smirnova, G.N.Tishchenko
FEPGUF	CHIRAL	Enantiopure	NO	NO	P1	1	TRUE	FALSE	4.95	1	1	5	C	5	5	3	2	0	(1, SRRSR)	1	1	chiral	C1	1	1	1	W1_enantiopure AU	contains following chiral atom(s)C	NA	NA	6.6254	10.382	11.742	79.092	78.923	81.863	773.654	1.31273	C37 H39 Br1 O3	(-)-(1S,2R)-7-bromo-2-methyl-2,3-dihydro-1H-cyclopentaanaphthalen-1-yl 3-((5-methyl-2-isopropylcyclohexyl)oxy)biphenyl-4-carboxylate	120 K	None	418-419 K	colorless	None	None	None	None	S.Kuwahara, N.Tasaki, Y.Suzuki, M.Nakagawa, M.Ikeda, Y.Habata
FEPSEC	CHIRAL	Enantiopure	NO	NO	P1	1	TRUE	FALSE	3.85	4	1	4	C	4	4	0	4	0	(4, S)	1	4	chiral	C1	4	4	4	Wa-could be Diast	contains following chiral atom(s)C	NA	NA	5.8297	14.516	17.059	80.5156	88.5593	80.2619	1403.34	1.47945	C11 H12 Cl3 N1 O3	2,2,2-trichloro-N-(2-hydroxy-3-phenoxypropyl)acetamide	93 K	None	None	colorless	None	None	None	None	Y.Toda, R.Shiokawa, M.Iwasaki, D.Yamaguchi, K.Kawamura, K.Sukegawa, H.Suga
FEPZOP	ACHIRAL	+ achiral molecule	NO	NO	P1	1	TRUE	FALSE	5	0	0	0	No Chiral atom	0	0	0	0	0						1	1	1	NA	contains following chiral atom(s)No Chiral atom	NA	NA	8.73	9.56	11.32	68.43	89.18	86.51	876.929	1.16428	C36 H58 N2 O6	N,N-Di-n-butyl-29,30-dimethoxy-13,27-dimethyl-6,20-diaza-3,9,17,23-tetraoxatricyclo(23.3.1.111,15)triaconta-1(29),11,13,15(30),25,27-hexaene	None	None	None	colorless	None	None	None	z coord. of C38 is 0.5825 and not 0.8525	Liu Xiaolan, Miao Fangming, Yao Jingwen, He Yongbing, Wu Chengtai, Zhang Shaohui
FEQDIS	CHIRAL	Enantiopure + achiral molecule	NO	NO	P1	1	TRUE	FALSE	3.95	2	1	2	C	2	2	2	0	0	(2, R)	1	2	chiral	C1	3	2	2	Wa-could be Diast	contains following chiral atom(s)C	NA	NA	10.6807	11.1662	12.1952	91.978	108.56	117.334	1196.32	1.26176	C23 H29 N1 O7,0.5(C2 H6 O1)	7-t-butyl-2-methoxy-3-(3-methoxypropoxy)-11-oxo-6,7-dihydro-11H-pyrido1,2-d1,4benzoxazepine-10-carboxylic acid ethanol solvate	296 K	None	None	colorless	None	None	acetone / water	None	Yanbin Hu, Fei Sun, Qiang Yuan, Jinhua Du, Lihong Hu, Zhengxian Gu, Qiong Zhou, Xiaoting Du, Shibo He, Ya Sun, Qian Wang, Lirong Fan, Lina Wang, Shaohua Qin, Shuhui Chen, Jian Li, Wenqiang Wu, John Mao, Yixin Zhou, Qiaoyun Zhou, George Zhang, C.Z.Ding
FERKET	CHIRAL	Contains at least 2 different chemicals in enantiopure proportions + achiral molecule	NO	NO	P1	1	TRUE	FALSE	4.24	4	2	6	C	6	6	4	2	0	(2, S), (2, RR)	1, 1	2, 2	chiral, chiral	C2, C1	6	2	2	Wa-could be Diast	contains following chiral atom(s)C	NA	NA	12.1311	12.7649	12.8405	76.068	74.973	83.572	1861.29	1.3164	C14 H17 N3 O2 S1,C18 H14 O8,C4 H8 O2	(-)-N-((5S)-5-(1H-Imidazol-5-yl)-5,6,7,8-tetrahydro-1-naphthalenyl)methanesulfonamide (-)-dibenzoyl-L-tartaric acid ethyl acetate solvate	293.2 K	None	None	None	None	None	None	The atomic coordinates correspond to the 1H-imidazol-5-yl compound, not 1H-imidazol-4-yl as reported in the paper	R.J.Altenbach, A.Khilevich, T.Kolasa, J.J.Rohde, P.A.Bhatia, M.V.Patel, X.B.Searle, Fan Yang, W.H.Bunnelle, K.Tietje, E.K.Bayburt, W.A.Carroll, M.D.Meyer, R.Henry, S.A.Buckner, J.Kuk, A.V.Daza, I.V.Milicic, J.C.Cain, C.H.Kang, L.M.Ireland, T.L.Carr, T.R.Miller, A.A.Hancock, M.Nakane, T.A.Esbenshade, M.E.Brune, A.B.ONeill, D.M.Gauvin, S.P.Katwala, M.W.Holladay, J.D.Brioni, J.P.Sullivan
FERSAA	CHIRAL	Enantiopure	NO	NO	P1	1	TRUE	FALSE	2.71	1	1	6	C	6	3	1	5	0	(1, SSSRSS)	1	1	chiral	C1	1	1	1	W1_enantiopure AU	contains following chiral atom(s)C	NA	NA	6.1531	7.8385	12.4132	101.584	95.262	105.419	558.684	1.26192	C27 H36 O4	16-hydroxy-3-oxoatisan-17-yl benzoate	173 K	None	None	None	None	None	None	None	Ya Li, Xingzhi Jiao, Tinghong Lv, Meili Yang, Kun Gao
FESCOW01	ACHIRAL	+ achiral molecule	NO	NO	P1	1	TRUE	FALSE	4.75	0	0	0	No Chiral atom	0	0	0	0	0						1	1	1	NA	contains following chiral atom(s)No Chiral atom	NA	NA	6.0984	12.308	12.3112	117.369	101.583	96.494	781.191	1.14067	C30 H39 N3 O4 P1	tris(4-(N-t-Butyl-N-oxylamino)phenyl)phosphine oxide triradical	at 293 K	None	None	orange	room-temperature triclinic polymorph	None	chloroform/diethyl ether	None	O.B.Borobia, P.Guionneau, H.Heise, F.H.Kohler, L.Ducasse, J.Vidal-Gancedo, J.Veciana, S.Golhen, L.Ouahab, J.-P.Sutter
FESRED	CHIRAL	Enantiopure + achiral molecule	NO	NO	P1	1	TRUE	FALSE	2.64	1	1	9	C	9	8	3	6	0	(1, SRSRSSRSS)	1	1	chiral	C1	3	1	1	W1_enantiopure AU	contains following chiral atom(s)C	NA	NA	6.914	7.7202	8.7383	79.467	73.033	67.106	409.711	1.58602	C12 H21 N1 O11,2(H2 O1)	Î²-D-fructofuranosyl-(2-1)-6-amino-6-deoxy-Î±-D-glucopyranoside dihydrate	138 K	None	None	colorless	None	None	None	None	T.Fujimoto, T.Nishio, H.Hosaka, S.Mizoguchi, M.Tashiro
FETFIU	CHIRAL	Enantiopure	NO	NO	P1	1	TRUE	FALSE	3.55	1	1	5	C	5	4	2	3	0	(1, RSRSS)	1	1	chiral	C1	1	1	1	W1_enantiopure AU	contains following chiral atom(s)C	NA	NA	6.852	8.7437	9.7401	91.93	101.881	112.525	523.378	1.239	C26 H30 O3	(17aR)-3-(benzyloxy)-17a-methyl-17-oxa-17a-homo-estra-1,3,5(10)-trien-16-one	at 107 K	None	450-452 K	colorless	None	None	None	None	M.N.Sakac, D.A.Miljkovic, K.M.P.Gasi, M.Popsavin, O.R.Klisuric, S.M.Stankovic, S.Andric, R.Kovacevic
FETWOQ	CHIRAL	Enantiopure	NO	NO	P1	1	TRUE	FALSE	4.6	1	1	5	C	5	5	2	3	0	(1, RRSSS)	1	1	chiral	C1	1	1	1	W1_enantiopure AU	contains following chiral atom(s)C	NA	NA	5.47	6.066	8.953	98.55	97.31	113.96	262.605	1.5127	C11 H13 N1 O5	N-(3,4-Dihydroxy-7-oxobicyclo(3.2.0)hept-6-yl)succinimide	None	None	None	None	None	None	None	None	B.Sheldrick, D.Akrigg, M.I.Page, G.Cox
FETXOS	ACHIRAL	+ achiral molecule	NO	NO	P1	1	TRUE	FALSE	3.88	0	0	0	No Chiral atom	0	0	0	0	0						2	2	2	NA	contains following chiral atom(s)No Chiral atom	NA	NA	8.16	8.451	11.629	97.921	108.234	110.548	685.006	1.20372	C16 H12 N2 O1	4-(2,6-Dimethylphenoxy)phthalonitrile	at 293 K	None	None	colorless	None	None	methanol	None	O.Buyukgungor, B.Kosar, N.Akdemir, E.Agar, I.Gumrukcuoglu
FEVYOY	ACHIRAL	+ achiral molecule	NO	NO	P1	1	TRUE	FALSE	4.84	0	0	0	No Chiral atom	0	0	0	0	0						4	4	4	NA	contains following chiral atom(s)No Chiral atom	NA	NA	12.0221	13.7398	14.1889	96.28	102.191	111.396	2087.77	1.15644	C27 H25 N1	2-t-butyl-9-(2-methylnaphthalen-1-yl)-9H-carbazole	235.8 K	None	None	colorless	None	None	None	None	Chao Niu, Yi Zhou, Qiang Chen, Yan Zhu, Shengbiao Tang, Zhi-Xiang Yu, Jiangtao Sun
FEYHIB	ACHIRAL	+ achiral molecule	NO	NO	P1	1	TRUE	FALSE	4.48	0	0	0	No Chiral atom	0	0	0	0	0						3	2	2	NA	contains following chiral atom(s)No Chiral atom	NA	NA	10.6217	10.6283	10.8588	83.6308	88.2839	76.1307	1182.76	1.76219	C22 H11 B1 F15 N1,0.5(C1 H2 Cl2)	t-butylaminetris(pentafluorophenyl)borane dichloromethane solvate	at 173 K	None	None	colorless	None	None	None	None	G.Schatte, T.Chivers, H.M.Tuononen, R.Suontamo, R.Laitinen, J.Valkonen
FIBMIQ	CHIRAL	Enantiopure	NO	NO	P1	1	TRUE	FALSE	4.32	2	1	14	C	14	10	4	10	0	(2, SSSRSSR)	1	2	chiral	C1	2	2	2	Wa-could be Diast	contains following chiral atom(s)C	NA	NA	6.1269	6.8473	20.2325	98.233	95.708	101.625	815.589	1.17446	C19 H28 O2	(3S,5S,8R,9S,10S,13S,14R)-3-hydroxy-10,13-dimethyl-1,2,3,4,5,6,7,8,9,10,11,12,13,14-tetradecahydro-17H-cyclopentaaphenanthren-17-one	123 K	None	None	colorless	None	None	None	None	S.Al Muthafer, C.Schissler, V.Koch, H.Kuhner, M.Nieger, S.Brase
FIDBUP	ACHIRAL	+ achiral molecule	NO	NO	P1	1	TRUE	FALSE	3.88	0	0	0	No Chiral atom	0	0	0	0	0						2	2	2	NA	contains following chiral atom(s)No Chiral atom	NA	NA	9.59	9.81	10.033	105.6	74.4	94.4	875.614	1.36106	C18 H15 Cl1 O4 Si1	Triphenylsilyl perchlorate	None	None	None	grey	None	None	None	None	G.K.S.Prakash, S.Keyaniyan, R.Aniszfeld, L.Heiliger, G.A.Olah, R.C.Stevens, Hok-Kin Choi, R.Bau
FIJZUX	CHIRAL	Enantiopure	NO	NO	P1	1	TRUE	FALSE	3.82	2	1	8	C	8	2	4	4	0	(2, RSRS)	1	2	chiral	C1	2	2	2	Wa-could be Diast	contains following chiral atom(s)C	NA	NA	9.7966	11.2235	12.888	100.461	104.23	113.971	1190.07	1.27953	C24 H30 N2 O7	dimethyl 3a-ethyl-7,7-dimethoxy-8-oxo-3a,4,6,7,8,10,11,12a-octahydro-1H,6aH-cyclopenta4,5pyrrolo2,3-hpyrrolo3,2,1-ijquinoline-5,6a-dicarboxylate	100 K	None	None	yellow	None	None	None	None	Yang Yu, Jing Wu, Mei-Fen Bao, J.Schinnerl, Xiang-Hai Cai
FIKGIQ	ACHIRAL	+ achiral molecule	NO	NO	P1	1	TRUE	FALSE	4.93	0	0	0	No Chiral atom	0	0	0	0	0						2	2	2	NA	contains following chiral atom(s)No Chiral atom	NA	NA	9.0917	10.7887	16.8411	91.394	93.779	103.101	1604.1	1.27896	C40 H32 N1 O2 P1 Si1	(S,Sp)-(3-(Triphenylsilyl)-1,1-binaphthyl-2,2-diyl)-NN-dimethylphosphoramidite	at 100 K	None	None	colorless	None	None	None	None	M.T.Reetz, Jun-An Ma, R.Goddard
FIMCUC	CHIRAL	Enantiopure + achiral molecule	NO	NO	P1	1	TRUE	FALSE	3.9	8	1	32	C	32	32	0	32	0	(8, SSSS)	1	8	chiral	C1	12	8	8	Wa-could be Diast	contains following chiral atom(s)C	NA	NA	12.1582	19.1469	23.6521	80.268	80.837	84.148	5341.57	1.31955	C26 H36 O4 Se1,0.5(C2 H6 O1 S1)	(2S,3S,4S,5S)-2,5-bis((4-(t-butyl)phenoxy)methyl)tetrahydroselenophene-3,4-diol dimethyl sulfoxide solvate	100 K	None	None	colorless	None	None	Re-crystallisation from solvent	None	Jie Yang See, Hui Yang, Yu Zhao, Ming Wah Wong, Zhihai Ke, Ying-Yeung Yeung
FIMZEJ	CHIRAL	Enantiopure	NO	NO	P1	1	TRUE	FALSE	4.33	1	1	2	C	2	0	2	0	0	(1, RR)	1	1	chiral	C1	1	1	1	W1_enantiopure AU	contains following chiral atom(s)C	NA	NA	6.05	7.181	9.232	97.737	90.909	108.243	376.74	1.59619	C14 H11 Br1 F3 N1 O2	ethyl 2-(4-bromophenyl)-1-cyano-2-(trifluoromethyl)cyclopropane-1-carboxylate	293 K	None	None	colorless	None	None	None	None	Wei-Sheng Huang, C.Schlinquer, T.Poisson, X.Pannecoucke, A.B.Charette, P.Jubault
FINTIF	CHIRAL	Enantiopure	NO	NO	P1	1	TRUE	FALSE	3.4	3	1	15	C	15	6	12	3	0	(3, SRRRR)	1	3	chiral	C1	3	3	3	Wa-could be Diast	contains following chiral atom(s)C	NA	NA	8.701	10.924	12.574	70.3	80.56	82.43	1106.2	1.13642	C15 H24 O3	Punctatin D	None	None	472-474 K	None	None	None	None	None	J.P.Poyser, R.L.Edwards, J.R.Anderson, M.B.Hursthouse, N.P.C.Walker, G.M.Sheldrick, A.J.S.Whalley
FITVOT	CHIRAL	Enantiopure	NO	NO	P1	1	TRUE	FALSE	4	1	1	9	C	9	4	5	4	0	(1, SSRRRRSSR)	1	1	chiral	C1	1	1	1	W1_enantiopure AU	contains following chiral atom(s)C	NA	NA	7.155	14.802	6.744	99.97	114.04	77.59	634.112	1.23257	C30 H46 O4	12Î±-Hydroxy-3-oxo-oleanano-28,13-lactone	None	None	None	colorless	None	None	None	None	D.S.Eggleston
FIVPOR	RACEMATE	Strict definition of kryptoracemate	KRYPTORACEMIC	NO	P1	1	TRUE	FALSE	3.16	2	1	2	C	2	2	1	1	0	(1, S), (1, R)	2	2	racemic	C1	2	2	2	RAC-1	contains following chiral atom(s)C	NA	NA	6.1413	8.6786	14.2186	84.699	83.15	74.522	723.67	1.38272	C18 H11 N3 O2	2-(4-Nitrophenyl)azulene-1,1(8aH)-dicarbonitrile	at 150 K	None	None	yellow	None	None	None	None	S.L.Broman, M.Jevric, A.D.Bond, M.B.Nielsen
FIVQOS	CHIRAL	Enantiopure	NO	NO	P1	1	TRUE	FALSE	2.99	2	1	10	C	10	10	8	2	0	(2, RRRSR)	1	2	chiral	C1	2	2	2	Wa-could be Diast	contains following chiral atom(s)C	NA	NA	10.6443	12.4845	12.8966	104.609	96.556	104.52	1576.38	1.28027	C37 H37 N1 O7	2-(3,4,5-tris(benzyloxy)-6-((benzyloxy)methyl)tetrahydro-2H-pyran-2-yl)-1,2-oxazol-5(2H)-one	at 133 K	None	None	colorless	None	None	None	None	T.Becker, H.Gorls, G.Pauls, R.Wedekind, M.Kai, S.H.von Reu, W.Boland
FIWGUP	CHIRAL	Enantiopure	NO	NO	P1	1	TRUE	FALSE	3.07	1	1	3	C	3	3	3	0	0	(1, RRR)	1	1	chiral	C1	1	1	1	W1_enantiopure AU	contains following chiral atom(s)C	NA	NA	5.041	10.187	10.943	92.56	95.52	101.11	547.713	1.22635	C22 H32 N2 O5	Benzyl N-((2-(((t-butoxycarbonyl)amino)methyl)cyclopentyl)carbonyl)alaninate	100 K	None	None	None	None	None	None	None	M.W.Giuliano, S.J.Maynard, A.M.Almeida, A.G.Reidenbach, Li Guo, E.C.Ulrich, I.A.Guzei, S.H.Gellman
FIXZIV	CHIRAL	Enantiopure	NO	NO	P1	1	TRUE	FALSE	4.2	2	1	8	C	8	8	4	4	0	(2, SRRS)	1	2	chiral	C1	2	2	2	Wa-could be Diast	contains following chiral atom(s)C	NA	NA	9.6223	10.4581	7.9109	105.224	90.415	64.832	690.232	1.44947	C12 H15 N1 O8	2,4-Di-O-acetyl-1-acetamido-1-deoxy-1-N,3-O-carbonyl-Î±-L-arabinopyranose	None	None	406-408 K	colorless	None	None	None	Formula given with cell data is incorrect, it should be H15 not H14. Hence given formula weight is incorrect	F.H.Cano, C.Foces-Foces, J.Jimenez-Barbero, A.Alemany, M.Bernabe, M.Martin-Lomas
FIYJIG	CHIRAL	Enantiopure	NO	NO	P1	1	TRUE	FALSE	3.5	1	1	7	C	7	5	4	3	0	(1, SSRSRRR)	1	1	chiral	C1	1	1	1	W1_enantiopure AU	contains following chiral atom(s)C	NA	NA	7.689	7.869	10.189	75.42	70.27	82.19	560.727	1.3531	C22 H29 Cl1 O8	8Î²-(2R,3S-3-Chloro-2-hydroxy-2-methylbutyryloxy)-14-acetoxy-tithifolin	None	None	493-495 K	None	None	None	None	None	G.Delgado, L.Alvarez, M.Soriano-Garcia, R.A.Toscano, R.Mata, R.Pereda-Miranda
FIYPEI	CHIRAL	Enantiopure	NO	NO	P1	1	TRUE	FALSE	3.71	1	1	2	C	2	2	1	1	0	(1, RS)	1	1	chiral	C1	1	1	1	W1_enantiopure AU	contains following chiral atom(s)C	NA	NA	5.88	7.449	11.197	98.41	90.13	91.97	484.856	1.41223	C20 H17 F5 N2 O2	(2S,5R)-2-Benzyl-5-(pentafluorophenylmethyl)-3,6-dimethoxy-2,5-dihydropyrazine	None	None	None	colorless	None	None	None	None	M.Bolte, B.Benecke, E.Egert
FOKDOZ	ACHIRAL	+ achiral molecule	NO	NO	P1	1	TRUE	FALSE	3.98	0	0	0	No Chiral atom	0	0	0	0	0						2	2	2	NA	contains following chiral atom(s)No Chiral atom	NA	NA	7.6222	8.1632	10.8258	104.204	92.342	94.563	649.663	1.6111	C16 H11 Br1 O2	2-Bromo-6-methoxy-3-phenylindenone	at 295 K	None	96-98 deg.C	red	None	None	hexane/ethyl acetate	None	M.K.Seery, S.M.Draper, J.M.Kelly, T.McCabe, T.B.H.McMurry
FOKMID	CHIRAL	Enantiopure	NO	NO	P1	1	TRUE	FALSE	2.52	1	1	2	C	2	1	2	0	0	(1, RR)	1	1	chiral	C1	1	1	1	W1_enantiopure AU	contains following chiral atom(s)C	NA	NA	6.4597	9.7895	10.0741	70.729	76.156	79.307	579.933	1.38976	C25 H25 Br1 O5	t-Butyl 2-(1-(4-bromophenyl)-2-(methoxycarbonyl)prop-2-en-1-yl)-1-oxoindane-2-carboxylate	at 150 K	None	None	colorless	None	None	None	None	M.Kamlar, S.Hybelbauerova, I.Cisarova, J.Vesely
FOLQIH	CHIRAL	Enantiopure	NO	NO	P1	1	TRUE	FALSE	4.04	1	1	3	C	3	2	1	2	0	(1, RSS)	1	1	chiral	C1	1	1	1	W1_enantiopure AU	contains following chiral atom(s)C	NA	NA	5.888	6.099	9.526	99.53	97.03	106.78	317.711	1.30816	C14 H18 O4	(2S,4R,9S)-4,2-Epoxymethano-5,8-dimethoxy-9-methyl-1,2,3,4-tetrahydronaphthalen-2-ol	at 293 K	None	484-486 K	colorless	None	None	None	None	B.Szechner, O.Achmatowicz, J.K.Maurin
FOLRUU	CHIRAL	Enantiopure	NO	NO	P1	1	TRUE	FALSE	4.86	1	1	3	C	3	3	3	0	0	(1, RRR)	1	1	chiral	C1	1	1	1	W1_enantiopure AU	contains following chiral atom(s)C	NA	NA	4.7558	8.1213	15.1937	82.313	89.57	87.254	580.889	1.22057	C25 H31 Cl1 N2 O2	N-Ethyl-N-(2-(2-(4-phenylbutyl)-5-chloro-2,3-dihydrobenzofuran-4-yl)cyclopropylmethyl)urea	at 293 K	None	None	colorless	None	None	None	None	Li-Qiang Sun, K.Takaki, Jie Chen, S.Bertenshaw, L.Iben, C.D.Mahle, E.Ryan, Dedong Wu, Qi Gao, Cen Xu
FOLTAC	ACHIRAL	+ achiral molecule	NO	NO	P1	1	TRUE	FALSE	4.03	0	0	0	No Chiral atom	0	0	0	0	0						6	2	2	NA	contains following chiral atom(s)No Chiral atom	NA	NA	7.7516	12.8092	13.5909	115.34	90.973	106.343	1155.56	1.36091	C19 H13 N5 O1,2(C3 H7 N1 O1)	3,6-bis(Indol-3-yl)-1,2,4-triazin-4(1H,4H)-one dimethylformamide solvate	at 100 K	None	above 250deg.C(dec.)	colorless	None	None	hexanes/dimethylformamide/methanol	None	N.K.Garg, B.M.Stoltz
FOMDIW	DIASTEREOMER		NO	NO	P1	1	TRUE	FALSE	4.86	2	1	6	C	6	4	1	5	0	(1, SSR), (1, SSS)	2	2	diast	C1	2	2	2	DIAST-1, contains DIAST	contains following chiral atom(s)C	NA	NA	6.6766	7.1292	16.0995	78.423	84.663	65.46	682.875	1.21746	C15 H22 O3	1-hydroxy-6,6,9a-trimethyl-4,5,5a,6,7,8,9,9a-octahydronaphtho1,2-cfuran-3(1H)-one	at 295 K	None	None	colorless	None	None	None	None	C.Paz Robles, D.Mercado, S.Suarez, R.Baggio
FONVOW	DIASTEREOMER		NO	NO	P1	1	TRUE	FALSE	4.07	2	1	4	C	4	2	1	3	0	(1, RS), (1, SS)	2	2	diast	C1	2	2	2	DIAST-1, contains DIAST	contains following chiral atom(s)C	NA	NA	9.345	10.623	12.149	99.111	90.3	114.73	1078.18	1.33231	C25 H24 N2 O3 S1	4-methyl-N-1-methyl-2-oxo-3-(1-phenylprop-2-en-1-yl)-2,3-dihydro-1H-indol-3-ylbenzene-1-sulfonamide	130 K	None	None	colorless	None	None	None	None	Li-Min Shi, Xi-Shang Sun, Chong Shen, Zuo-Fei Wang, Hai-Yan Tao, Chun-Jiang Wang
FONVUC	CHIRAL	Enantiopure + achiral molecule	NO	NO	P1	1	TRUE	FALSE	3.85	4	1	8	C	8	4	0	8	0	(4, SS)	1	4	chiral	C1	5	4	4	Wa-could be Diast	contains following chiral atom(s)C	NA	NA	8.323	13.743	20.113	94.792	94.837	92.419	2281.57	1.32102	C25 H24 N2 O3 S1,0.25(C1 H2 Cl2)	4-methyl-N-1-methyl-2-oxo-3-(1-phenylprop-2-en-1-yl)-2,3-dihydro-1H-indol-3-ylbenzene-1-sulfonamide dichloromethane solvate	130 K	None	None	colorless	None	None	None	None	Li-Min Shi, Xi-Shang Sun, Chong Shen, Zuo-Fei Wang, Hai-Yan Tao, Chun-Jiang Wang
FONXIQ	CHIRAL	Enantiopure	NO	NO	P1	1	TRUE	FALSE	3.9	2	1	8	C	8	8	4	4	0	(2, RSSR)	1	2	chiral	C1	2	2	2	Wa-could be Diast	contains following chiral atom(s)C	NA	NA	8.351	10.977	12.4447	63.902	77.89	67.88	947.739	1.2491	C21 H28 N2 O3	Methyl 5-(hydroxymethyl)corynan-17-oate	at 294 K	None	466-467 K	colorless	None	None	None	None	M.Amat, A.Gomez-Esque, C.Escolano, M.M.M.Santos, E.Molins, J.Bosch
FOPPAD	CHIRAL	Enantiopure	NO	NO	P1	1	TRUE	FALSE	3.44	2	1	2	C	2	2	0	2	0	(2, S)	1	2	chiral	C1	2	2	2	Wa-could be Diast	contains following chiral atom(s)C	NA	NA	7.176	10.859	12.059	100.648	106.125	95.565	876.162	1.3018	C19 H21 N1 O3 S1	10-(t-Butylsulfinyl)-3,9b,10,11-tetrahydrochromeno4,3-bcyclopentadpyridin-2(4H)-one	at 296 K	None	None	None	None	None	None	None	Lin Su, Ting-Shun Zhu, Ming-Hua Xu
FOPYER	ACHIRAL	+ achiral molecule	NO	NO	P1	1	TRUE	FALSE	3.48	0	0	0	No Chiral atom	0	0	0	0	0						6	6	6	NA	contains following chiral atom(s)No Chiral atom	NA	NA	10.9933	12.3516	15.6379	100.537	91.1422	105.104	2010.36	1.11682	C12 H19 N1 O1 S1	N-(3,5-dimethylphenyl)-2-methylpropane-2-sulfinamide	293 K	None	None	colorless	None	None	None	None	Shuanglin Qin, Yunhao Luo, Yue Sun, Le Tian, Shende Jiang, Jun yan, Guang Yang
FOPZIV	CHIRAL	Enantiopure	NO	NO	P1	1	TRUE	FALSE	3.01	2	1	12	C	12	12	8	4	0	(2, RRSRSR)	1	2	chiral	C1	2	2	2	Wa-could be Diast	contains following chiral atom(s)C	NA	NA	9.7564	9.9572	10.1902	109.194	111.437	90.714	860.274	1.36798	C16 H22 N2 O7	5-((4-methoxyphenyl)amino)-2,2-dimethyl-6-nitrohexahydro-1,3-benzodioxole-4,7-diol	at 100 K	None	None	yellow	None	None	None	None	R.C.Acurcioa, R.G.Soengas, F.A.A.Pazb, A.M.S.Silva
FOQRIO	CHIRAL	Enantiopure + achiral molecule	NO	NO	P1	1	TRUE	FALSE	3.89	1	1	4	C	4	4	3	1	0	(1, RRSR)	1	1	chiral	C1	14	1	1	W1_enantiopure AU	contains following chiral atom(s)C	NA	NA	9.44471	10.389	15.6489	77.4892	72.8378	77.6285	1413.55	1.52131	C8 H12 N4 O5,6(C7 H6 O4),7(H2 O1)	1-(3,4-dihydroxy-5-(hydroxymethyl)tetrahydrofuran-2-yl)-1H-1,2,4-triazole-3-carboxamide hexakis(3,5-dihydroxybenzoic acid) heptahydrate	150 K	None	None	colorless	None	None	None	None	Jia-Mei Chen, Song Li, Tong-Bu Lu
FOWBEB	ACHIRAL	+ achiral molecule	NO	NO	P1	1	TRUE	FALSE	4.26	0	0	0	No Chiral atom	0	0	0	0	0						2	2	2	NA	contains following chiral atom(s)No Chiral atom	NA	NA	9.342	10.6297	12.094	64.937	87.716	82.466	1078.33	1.38692	C24 H20 Br1 N1 O3	ethyl 1-(2-bromo-5-methylphenyl)-4-hydroxy-2-phenyl-1H-indole-3-carboxylate	296.1 K	None	None	colorless	None	None	None	None	Lei Wang, Jialing Zhong, Xufeng Lin
FOWBIF	ACHIRAL	+ achiral molecule	NO	NO	P1	1	TRUE	FALSE	2.38	0	0	0	No Chiral atom	0	0	0	0	0						2	2	2	NA	contains following chiral atom(s)No Chiral atom	NA	NA	8.6188	11.0795	12.2635	71.191	82.07	82.018	1092.35	1.47867	C27 H20 Br1 N1 O3	ethyl 1-(4-bromonaphthalen-1-yl)-4-hydroxy-2-phenyl-1H-indole-3-carboxylate	170 K	None	None	yellow	None	None	None	None	Lei Wang, Jialing Zhong, Xufeng Lin
FOWVAO	CHIRAL	Enantiopure	NO	NO	P1	1	TRUE	FALSE	4.66	1	1	1	C	1	1	0	1	0	(1, S)	1	1	chiral	C1	1	1	1	W2_enantiopure AU	contains following chiral atom(s)C	NA	NA	6.86	8.887	9.631	117.24	102.6	97.53	491.094	1.21919	C20 H29 P1 S1 Si1	1,1-Diphenyl-2-triethylphosphonio-1-silapropane-1-sulfide	at 153 K	None	None	colorless	None	None	None	None	V.N.Khrustalev, N.N.Zemlyanskii, I.V.Borisova, Yu.A.Ustynyuk, E.A.Chernyshev
FOWZUN	ACHIRAL	+ achiral molecule	NO	NO	P1	1	TRUE	FALSE	3.57	0	0	0	No Chiral atom	0	0	0	0	0						2	2	2	NA	contains following chiral atom(s)No Chiral atom	NA	NA	8.339	8.349	8.663	94.717	95.21	94.298	596.545	1.23725	C11 H14 N2 O3	N-(3,4-Dimethoxybenzylidene)acetohydrazide	at 223 K	None	468-470 K	colorless	triclinic polymorph	None	ethanol	None	Bao-Cheng Zhou, Lu-Ping Lv, Wen-Bo Yu, Wei-Wei Li, Xian-Chao Hu
FOXRER	CHIRAL	Enantiopure	NO	NO	P1	1	TRUE	FALSE	3.11	1	1	1	C	1	1	0	1	0	(1, S)	1	1	chiral	C1	1	1	1	W2_enantiopure AU	contains following chiral atom(s)C	NA	NA	7.4326	8.4705	8.8458	74.143	74.315	83.209	515.179	1.48392	C22 H22 Br1 N1 O3 S1	2-Benzyl-4-(pyridin-4-yl)butyl 4-bromobenzenesulfonate	at 130 K	None	None	colorless	None	None	None	None	Sinan Wang, Xiangmin Li, Hongwei Liu, Li Xu, Jinchen Zhuang, Jian Li, Hao Li, Wei Wang
FOYLEL	CHIRAL	Enantiopure	NO	NO	P1	1	TRUE	FALSE	3.94	2	1	6	C	6	6	4	2	0	(2, RRS)	1	2	chiral	C1	2	2	2	Wa-could be Diast	contains following chiral atom(s)C	NA	NA	6.677	7.4302	10.355	90.954	108.025	95.194	485.966	1.31356	C11 H12 O3	(3R,4R,5S)-4-Hydroxy-3-methyl-5-phenyltetrahydrofuran-2-one	at 100 K	None	90deg.C	colorless	None	None	ethyl acetate	None	B.Sammet, H.Radzey, B.Neumann, H.-G.Stammler, N.Sewald
FOYMIQ	ACHIRAL	+ achiral molecule	NO	NO	P1	1	TRUE	FALSE	4.44	0	0	0	No Chiral atom	0	0	0	0	1						7	1	1	NA	contains following chiral atom(s)No Chiral atom	NA	NA	8.5596	8.5829	9.6389	88.939	89.336	76.266	687.75	1.40391	C12 H30 Cs1 N2 O9,6(H3 N1)	bis(Ammine)-(18-crown-6)-(ozonido-O,O)-cesium ammonia solvate	at 100K	None	None	None	None	None	None	Temperature given as 446K in the cif and 100K in the paper; the latter has been used.	H.Nuss, J.Nuss, M.Jansen
FOZQOC	CHIRAL	Enantiopure	NO	NO	P1	1	TRUE	FALSE	3.07	1	1	2	C	2	1	0	2	0	(1, SS)	1	1	chiral	C1	1	1	1	W1_enantiopure AU	contains following chiral atom(s)C	NA	NA	6.439	8.7291	10.3553	110.203	94.88	95.232	539.704	1.3644	C24 H21 N5 O4	9-((2,4-dinitrophenyl)hydrazono)-3-methyl-9a-phenyl-2,3,9,9a-tetrahydro-1H-pyrrolo1,2-aindole	291 K	None	None	None	None	None	None	None	Nan Li, Tian-Yi Wang, Liu-Zhu Gong, Liming Zhang
FRANAC03	ACHIRAL	+ achiral molecule	NO	NO	P1	1	TRUE	FALSE	3.41	0	0	0	No Chiral atom	0	0	0	0	0						2	2	2	NA	contains following chiral atom(s)No Chiral atom	NA	NA	3.6825	6.7024	10.185	72.76	83.76	82.83	237.527	1.56713	C5 H4 O3	Furan-2-carboxylic acid	at 100 K	None	None	colorless	None	None	None	The cell length a is 3.6825(7) as given in the cif and not 3.7825(7) as given in the paper.	H.T.Flakus, M.Jablonska, J.Kusz
FUBXAC	CHIRAL	Enantiopure	NO	NO	P1	1	TRUE	FALSE	3.45	1	1	1	C	1	1	1	0	0	(1, R)	1	1	chiral	C1	1	1	1	W2_enantiopure AU	contains following chiral atom(s)C	NA	NA	6.1541	7.9492	8.6988	71.93	70.89	83	382.166	1.29199	C15 H23 N1 O5	(2E,4Z)-Methyl 5-((R)-2,2,5,5-tetramethyl-1,3-dioxane-4-carboxamido)penta-2,4-dienoate	at 120 K	None	None	colorless	None	None	None	None	J.E.Mathieson, J.J.Crawford, M.Schmidtmann, R.Marquez
FUFRUW	ACHIRAL	+ achiral molecule	NO	NO	P1	1	TRUE	FALSE	4.1	0	0	0	No Chiral atom	0	0	0	0	0						2	2	2	NA	contains following chiral atom(s)No Chiral atom	NA	NA	7.4535	12.391	13.0549	101.332	105.969	107.213	1055.34	1.20044	C26 H23 N1 O2	5-methoxy-2-{2-2-(4-methoxyphenyl)ethenylnaphthalen-1-yl}aniline	296.1 K	None	None	yellow	None	None	None	None	Bei-Bei Zhan, Lei Wang, Jun Luo, Xu-Feng Lin, Bing-Feng Shi
FUHZEQ	CHIRAL	Enantiopure	NO	NO	P1	1	TRUE	FALSE	3.47	1	1	1	C	1	0	1	0	0	(1, R)	1	1	chiral	C1	1	1	1	W2_enantiopure AU	contains following chiral atom(s)C	NA	NA	6.0838	7.2384	8.3465	104.527	95.732	105.236	337.846	1.24011	C17 H16 O2	(S)-2-hydroxy-1,2-diphenylpent-4-en-1-one	100 K	None	None	colorless	None	None	ethyl acetate/hexanes	None	R.Lavernhe, E.J.Alexy, Haiming Zhang, B.M.Stoltz
FUNVUF	CHIRAL	Enantiopure	NO	NO	P1	1	TRUE	FALSE	1.9	1	1	11	C	11	8	7	4	0	(1, SRRRRRRRSSS)	1	1	chiral	C1	1	1	1	W1_enantiopure AU	contains following chiral atom(s)C	NA	NA	8.383	10.533	11.141	68.9	80.07	72.09	871.185	1.28608	C35 H46 O13	Baccharinoid B2 triacetate	None	None	None	None	None	None	None	None	B.B.Jarvis, S.N.Comezoglu, H.L.Ammon, C.K.Breedlove, R.W.Miller, M.K.Woode, D.R.Streelman, A.T.Sneden, R.G.Dailey Junior, S.M.Kupchan
FUPVAN	MESO		NO	NO	P1	1	TRUE	FALSE	3.9	1	1	5	C	5	5	3	2	0	(1, RSRRS)	1	1	MESO, MESO	Cs	1	1	1	Condition 2	contains following chiral atom(s)C	NA	NA	5.8922	8.5855	12.2216	78.145	79.181	76.108	581.11	1.19889	C30 H29 N1 O1	1-Methyl-2,3,5,6-tetraphenylpiperidin-4-ol	None	None	265-267deg.C	None	None	None	None	None	V.Parthasarathi, P.T.Beurskens, H.J.J.Behm, S.Garcia-Granda, M.K.Pillay
FUQNIP	ACHIRAL	+ achiral molecule	NO	NO	P1	1	TRUE	FALSE	3.16	0	0	0	No Chiral atom	0	0	0	0	0						4	4	4	NA	contains following chiral atom(s)No Chiral atom	NA	NA	10.5676	13.375	15.023	103.159	95.365	106.548	1953.26	1.33812	C26 H19 N1 O1 S1	(R,P)-1-(2-(p-Tolylsulfinyl)-1-naphthyl)isoquinoline	at 100 K	None	429-431 K	colorless	None	None	None	None	J.Clayden, S.P.Fletcher, J.J.W.McDouall, S.J.M.Rowbottom
FURGAA02	ACHIRAL	+ achiral molecule	NO	NO	P1	1	TRUE	FALSE	3.6	0	0	0	No Chiral atom	0	0	0	0	0						8	4	4	NA	contains following chiral atom(s)No Chiral atom	NA	NA	9.731	18.18	5.294	98.01	99.97	84.87	911.368	1.55378	C7 H9 N5 O2,H2 O1	9-Ethyl-8-hydroxyguanine monohydrate	None	None	None	None	None	None	None	None	M.Doi, Y.In, M.Kikuchi, T.Ishida, M.Inoue
FURHOR	CHIRAL	Enantiopure + achiral molecule	NO	NO	P1	1	TRUE	FALSE	4.86	2	1	36	C	36	36	18	18	0	(2, RSRSRRSSSRSSRSRRSR)	1	2	chiral	C1	9	2	2	Wa-could be Diast	contains following chiral atom(s)C	NA	NA	9.2541	12.59	13.779	101.687	97.02	92.713	1556.01	1.38224	C24 H40 O16,3.5(H2 O1)	2-((4,5-dihydroxy-2-((6-hydroxy-2-methyl-5-((3,4,5-trihydroxy-6-methyltetrahydro-2H-pyran-2-yl)oxy)-3,6-dihydro-2H-pyran-3-yl)oxy)-6-methyltetrahydro-2H-pyran-3-yl)oxy)-6-methyltetrahydro-2H-pyran-3,4,5-triol hydrate	173 K	None	None	None	None	None	None	None	Xian-Wen Yang, Zi Miao, Xiao-Ni Ma, Gai-Yun Zhang, A.Steinmetz, Bin Yang, Jun-Feng Wang, Juan Liu, Yonghong Liu, Ning Wang
FURLOV	CHIRAL	Enantiopure	NO	NO	P1	1	TRUE	FALSE	3.65	3	1	12	C	12	9	12	0	0	(3, RRRR)	1	3	chiral	C1	3	3	3	Wa-could be Diast	contains following chiral atom(s)C	NA	NA	6.8116	12.163	13.5671	112.835	103.767	91.324	997.768	1.23979	C15 H20 O3	5-hydroxy-5,8-dimethyl-3-methylene-3a,4,4a,5,6,7,9,9a-octahydroazuleno6,5-bfuran-2(3H)-one	180 K	None	None	colorless	None	None	None	None	M.G.Hyldgaard, S.Purup, A.D.Bond, X.C.Frette, Haiyan Qu, K.T.Jensen, L.P.Christensen
FUVVIC	CHIRAL	Enantiopure	NO	NO	P1	1	TRUE	FALSE	3.49	1	1	4	C	4	4	2	2	0	(1, RRSS)	1	1	chiral	C1	1	1	1	W1_enantiopure AU	contains following chiral atom(s)C	NA	NA	5.231	6.481	9.311	88.5	75.39	82.16	302.589	1.5654	C11 H15 N3 O6	5-(1-Aminoethylidene)-3-(3,4-dihydroxy-5-(hydroxymethyl)tetrahydrofuran-2-yl)pyrimidine-2,4(3H,5H)-dione	at 296 K	None	None	None	None	None	None	None	J.-J.Bosc, L.Latxague, J.-M.Leger, J.Balzarini, I.Forfar, C.Jarry, J.Guillon
FUXBIJ	CHIRAL	Enantiopure	NO	NO	P1	1	TRUE	FALSE	3.4	1	1	3	C	3	3	2	1	0	(1, RSR)	1	1	chiral	C1	1	1	1	W1_enantiopure AU	contains following chiral atom(s)C	NA	NA	6.0321	6.775	9.6699	76.917	78.871	75.344	368.518	1.41619	C13 H18 N2 O7	3-Acetyloxy-2-deoxy-5-methoxymethyluridine	None	None	378-380K	None	None	None	None	None	J.W.Quail, G.Tourigny, L.T.J.Delbaere, O.A.L.El-Kabbani, A.L.Stuart, S.V.Gupta
FUXBIJ01	CHIRAL	Enantiopure	NO	NO	P1	1	TRUE	FALSE	1.6	1	1	3	C	3	3	2	1	0	(1, RSR)	1	1	chiral	C1	1	1	1	W1_enantiopure AU	contains following chiral atom(s)C	NA	NA	5.9701	6.7357	9.577	77.21	79.95	75.45	360.623	1.4472	C13 H18 N2 O7	3-O-Acetyl-2-deoxy-5-methoxymethyluridine	at 145 K	None	None	None	None	None	None	None	Yunyi Wei, R.J.Barton, B.Robertson
FUXYUS	CHIRAL	Enantiopure	NO	NO	P1	1	TRUE	FALSE	4.2	3	1	24	C	24	12	12	12	0	(3, RSRSSRSR)	1	3	chiral	C1	3	3	3	Wa-could be Diast	contains following chiral atom(s)C	NA	NA	6.435	12.749	17.351	87.6	100.7	92.05	1396.93	1.18565	C21 H32 O3	Methyl 2a,6,9a-trimethyl-3b,3-epoxymethanoperhydrocyclopropano(i)phenanthrene-6-carboxylate	None	None	None	colorless	None	None	None	In bond table, C16-O28 is given as C16-C28. Also C34-C48 should be 1.533, not 1.553. Author corrections supplied: z of H165 is 0.6859, not 0.8659; z of H175 is 0.4578, not 0.5478; distance C65-C66 is 1.552, not 1.522	G.Precigoux, F.Leroy, B.Arreguy-San Miguel, M.Taran, B.Delmond
FUZTIE	CHIRAL	Enantiopure	NO	NO	P1	1	TRUE	FALSE	4.29	2	1	6	C	6	4	0	6	0	(2, SSS)	1	2	chiral	C1	2	2	2	Wa-could be Diast	contains following chiral atom(s)C	NA	NA	7.4784	7.4915	12.8876	100.421	90.817	107.985	673.513	1.17516	C14 H22 O3	1-Hydroxy-5,5,8a-trimethyl-1,4,4a,5,6,7,8,8a-octahydronaphthalene-2-carboxylic acid	at 298 K	None	None	None	None	None	None	None	Ming-sheng Liu, Chang Liu, Xiao-po Zhang, Lin Sheng, Jun-qing Zhang, Sheng-li Kang
GAFTOX	CHIRAL	Enantiopure	NO	NO	P1	1	TRUE	FALSE	2.93	1	1	2	C	2	2	1	1	0	(1, SR)	1	1	chiral	C1	1	1	1	W1_enantiopure AU	contains following chiral atom(s)C	NA	NA	6.1035	8.9701	9.7458	117.015	93.643	94.915	470.44	1.27236	C16 H28 N2 O5 S1	N-(2-Cyano-3-(1,3-dioxolan-2-yl)-1-(2-(1,3-dioxolan-2-yl)ethyl)propyl)methanesulfinamide	at 170.2 K	None	380-381 K	colorless	None	None	pentane/dichloromethane	None	L.B.Schenkel, J.A.Ellman
GAGFAX	RACEMATE	Strict definition of kryptoracemate	KRYPTORACEMIC	NO	P1	1	TRUE	FALSE	4.82	2	1	2	C	2	2	1	1	0	(1, S), (1, R)	2	2	racemic	C1	2	2	2	RAC-1	contains following chiral atom(s)C	NA	NA	9.495	10.33	11.612	110.73	97.3	113.68	926.075	1.34993	C18 H20 N2 O5 S1	Ethyl 5-(-2,4-dimethoxyphenyl)-7-methyl-3-oxo-3,5-dihydro-2H-thiazolo(3,2-a)pyrimidine-6-carboxylate	at 293 K	None	402-403 K	orange	None	None	ethanol	The deposited cif has the structure modelled in space group P1, as opposed to P-1 as given in the paper	I.V.Kulakov, G.M.Isabaeva, S.D.Fazylov, D.M.Turdybekov, O.A.Nurkenov, K.M.Yurdybekov
GAGFEZ11	CHIRAL	Enantiopure + achiral molecule	NO	NO	P1	1	TRUE	FALSE	3.58	1	1	14	C	14	13	7	7	0	(1, RRSRSSSSRSRRSR)	1	1	chiral	C1	2	1	1	W1_enantiopure AU	contains following chiral atom(s)C	NA	NA	9.842	10.205	12.698	89.284	78.363	88.413	1248.63	1.3486	C50 H63 N1 O19,C1 H4 O1	4-{1-21-(acetyloxy)-5,17,19-trihydroxy-2,4,12,18,20,22-hexamethyl-23-(4-methyltetrahydro-2H,4H-1,3dioxolo4,5-cpyran-6-yl)oxy-1,6,9,11-tetraoxo-1,2,6,9-tetrahydro-2,7-(epoxypentadeca1,11,13trienoimino)naphtho2,1-bfuran-16-ylethoxy}-3,3-dimethyl-4-oxobutanoic acid methanol solvate	120 K	None	None	yellow	None	None	Re-crystallisation from solvent: methanol	None	H.Mosaei, V.Molodtsov, B.Kepplinger, J.Harbottle, C.W.Moon, R.E.Jeeves, L.Ceccaroni, Yeonoh Shin, S.Morton-Laing, E.C.L.Marrs, C.Wills, W.Clegg, Yulia Yuzenkova, J.D.Perry, J.Bacon, Jeff Errington, N.E.E.Allenby, M.J.Hall, K.S.Murakami, N.Zenkin
GAGFEZ12	CHIRAL	Enantiopure + achiral molecule	NO	NO	P1	1	TRUE	FALSE	3.59	1	1	14	C	14	13	7	7	0	(1, RRSRSSSSRSRRSR)	1	1	chiral	C1	2	1	1	W1_enantiopure AU	contains following chiral atom(s)C	NA	NA	9.8562	10.2052	12.7069	89.294	78.348	88.446	1251.29	1.34574	C50 H63 N1 O19,C1 H4 O1	4-{1-21-(acetyloxy)-5,17,19-trihydroxy-2,4,12,18,20,22-hexamethyl-23-(4-methyltetrahydro-2H,4H-1,3dioxolo4,5-cpyran-6-yl)oxy-1,6,9,11-tetraoxo-1,2,6,9-tetrahydro-2,7-(epoxypentadeca1,11,13trienoimino)naphtho2,1-bfuran-16-ylethoxy}-3,3-dimethyl-4-oxobutanoic acid methanol solvate	150 K	None	None	yellow	None	None	None	None	H.Mosaei, V.Molodtsov, B.Kepplinger, J.Harbottle, C.W.Moon, R.E.Jeeves, L.Ceccaroni, Yeonoh Shin, S.Morton-Laing, E.C.L.Marrs, C.Wills, W.Clegg, Yulia Yuzenkova, J.D.Perry, J.Bacon, Jeff Errington, N.E.E.Allenby, M.J.Hall, K.S.Murakami, N.Zenkin
GAGSOA	CHIRAL	Enantiopure	NO	NO	P1	1	TRUE	FALSE	4.24	1	1	1	C	1	1	0	1	0	(1, S)	1	1	chiral	C1	1	1	1	W2_enantiopure AU	contains following chiral atom(s)C	NA	NA	6.335	8.365	9.375	113.629	90.122	90.73	455.099	1.25648	C22 H16 O4	(S)-3-oxo-1,3-dihydroisobenzofuran-1-yl 2,2-diphenylacetate	297 K	None	None	colorless	None	None	None	None	Muxing Zhou, T.Gridneva, Zhenfeng Zhang, Ende He, Yangang Liu, Wanbin Zhang
GAJBAY	CHIRAL	Enantiopure	NO	NO	P1	1	TRUE	FALSE	3.43	1	1	1	C	1	1	1	0	0	(1, R)	1	1	chiral	C1	1	1	1	W2_enantiopure AU	contains following chiral atom(s)C	NA	NA	5.4945	5.6272	10.4756	89.553	78.962	67.652	293.268	1.26418	C12 H17 N1 O3	2-amino-1-(2,2-dimethyl-2H,4H-1,3-benzodioxin-6-yl)ethan-1-ol	293 K	None	None	colorless	None	None	None	None	Yu-Cong Zheng, Fu-Long Li, Zuming Lin, Guo-Qiang Lin, Ran Hong, Hui-Lei Yu, Jian-He Xu
GAJMEN	CHIRAL	Enantiopure	NO	NO	P1	1	TRUE	FALSE	2.9	2	1	2	C	2	2	0	2	0	(2, S)	1	2	chiral	C1	2	2	2	Wa-could be Diast	contains following chiral atom(s)C	NA	NA	6.0016	7.031	10.0116	84.788	87.726	82.632	417.073	1.64124	C4 H6 N4 O6	2-methyl-1,3,3-trinitroazetidine	223 K	None	None	colorless	None	None	None	None	Heun-Jong Ha, Su-Jeong Lee, Duk-Ho Chang, Hyo-Jun Lee, Bora Kim, Seung Hee Kim, Jin Seuk Kim, Chang-Woo Cho
GANDIL	CHIRAL	Enantiopure	NO	NO	P1	1	TRUE	FALSE	3.44	2	1	14	C	14	6	4	10	0	(2, SSSSRSR)	1	2	chiral	C1	2	2	2	Wa-could be Diast	contains following chiral atom(s)C	NA	NA	6.0685	7.4278	21.1388	90.333	94.589	113.326	871.428	1.16034	C20 H32 O2	beyer-15-ene-2,18-diol	293 K	None	None	colorless	None	None	None	None	Jian-chen Li, Xian-rui Yuan, Yong-li Liu, Ye Li, Ning-ning Cui, Llii- Li, Jing Ha
GANKUE	CHIRAL	Enantiopure	NO	NO	P1	1	TRUE	FALSE	4.67	2	1	8	C	8	8	2	6	0	(2, SRSS)	1	2	chiral	C1	2	2	2	Wa-could be Diast	contains following chiral atom(s)C	NA	NA	9.7671	9.8657	11.8768	114.498	106.767	96.974	958.221	1.21471	C17 H26 N4 O2 S1	(1S,2S,3R,6S)-N-(2-azido-6-isopropyl-3-methyl-cyclohexyl)-4-methylbenzenesulfonamide	302 K	None	428 K	colorless	None	None	None	None	P.Roszkowski, J.K.Maurin, Z.Czarnocki
GAQCUX	CHIRAL	Enantiopure	NO	NO	P1	1	TRUE	FALSE	3.44	1	1	9	C	9	8	7	2	0	(1, RRRRSRRRS)	1	1	chiral	C1	1	1	1	W1_enantiopure AU	contains following chiral atom(s)C	NA	NA	8.584	9.118	9.605	67.01	68.02	78.3	640.347	1.33452	C25 H38 O9 S1	2-Oxo-2-(2,2,4,4-tetramethyl-7-((methylsulfonyl)oxy)dodecahydro-3bH-5,7a-(epoxymethano)phenanthro(9,10-d)(1,3)dioxol-10-yl)ethyl acetate	at 289 K	None	423-424 K	colorless	None	None	cyclohexane/acetone	None	Liang Xu, Feng-Peng Wang
GAQTAX	ACHIRAL	+ achiral molecule	NO	NO	P1	1	TRUE	FALSE	4.24	0	0	0	No Chiral atom	0	0	0	0	0						1	1	1	NA	contains following chiral atom(s)No Chiral atom	NA	NA	9.6232	10.0676	12.2837	76.354	78.755	61.664	1013.1	1.32573	C54 H38 N2 O2 P2	4,4-2,2-bis(diphenylphosphoryl)1,1-binaphthalene-4,4-diyldipyridine	140 K	None	None	colorless	None	None	hexane/ dimethylformamide/ methanol	None	K.Samarakoon, B.Averkiev, T.Gadzikwa
GASXIK	ACHIRAL	+ achiral molecule	NO	NO	P1	1	TRUE	FALSE	3.37	0	0	0	No Chiral atom	0	0	0	0	0						2	2	2	NA	contains following chiral atom(s)No Chiral atom	NA	NA	8.52761	9.18592	12.163	67.835	88.329	85.564	879.724	1.14902	C17 H25 N2 O1 P1	1-(di-t-butylphosphoryl)-3-phenyl-imidazol-2-ylidene	123 K	None	None	colorless	None	None	None	None	Y.Hoshimoto, T.Asada, S.Hazra, T.Kinoshita, P.Sombut, R.Kumar, M.Ohashi, S.Ogoshi
GATLOF	ACHIRAL	+ achiral molecule	NO	NO	P1	1	TRUE	FALSE	2.75	0	0	0	No Chiral atom	0	0	0	0	0						2	2	2	NA	contains following chiral atom(s)No Chiral atom	NA	NA	8.0739	8.4676	8.6682	98.0228	96.071	97.19	577.602	1.52178	C11 H9 Cl1 N4 O2	N-(4-chloro-6-methoxy-1,3,5-triazin-2-yl)benzamide	103 K	None	None	colorless	None	None	None	None	M.Kunishima, D.Kato, N.Kimura, M.Kitamura, K.Yamada, K.Hioki
GATPAW	CHIRAL	Enantiopure	NO	NO	P1	1	TRUE	FALSE	4.45	2	1	4	C	4	2	4	0	0	(2, RR)	1	2	chiral	C1	2	2	2	Wa-could be Diast	contains following chiral atom(s)C	NA	NA	8.4924	10.5805	12.4778	93.506	102.76	99.165	1074.11	1.4178	C22 H20 F1 N3 O3 S2	ethyl 2-(1,3-benzothiazol-2-yl)-2-fluoro-5-(1-methyl-1H-imidazol-2-yl)-5-oxo-3-(thiophen-2-yl)pentanoate	273.1 K	None	None	colorless	None	None	ethyl acetate/ hexane	None	Arko Das, H.Joshi, V.K.Singh
GATPOI	CHIRAL	Enantiopure + achiral molecule	NO	NO	P1	1	TRUE	FALSE	3.79	2	1	4	C P	2	0	4	0	0	(2, RR)	1	2	chiral	C1	6	2	2	Wa-could be Diast	contains following chiral atom(s)C,P	NA	NA	8.1581	9.0992	9.3617	105.929	97.568	91.778	660.788	1.6194	C10 H11 N2 O6 P1,2(H2 O1)	(-)-Hydrogen (1-carboxy-1-hydroxy-2-(imidazo1,2-apyridin-1-ium-3-yl)ethyl)phosphonate dihydrate	at 153 K	None	None	colorless	None	None	None	None	K.M.Blazewska, Feng Ni, R.Haiges, B.A.Kashemirov, F.P.Coxon, C.A.Stewart, R.Baron, M.J.Rogers, M.C.Seabra, F.H.Ebetino, C.E.McKenna
GATROL	CHIRAL	Enantiopure	NO	NO	P1	1	TRUE	FALSE	3.68	2	1	4	C	4	4	0	4	0	(2, SS)	1	2	chiral	C1	2	2	2	Wa-could be Diast	contains following chiral atom(s)C	NA	NA	10.442	11.0317	17.4061	94.319	93.772	104.259	1930.38	1.26939	C35 H55 N5 O12	N-(benzyloxy)carbonyl-2-methylalanyl-2-methylalanyl-2-methylalanyl-N-(3S,4S)-1-(methoxycarbonyl)-3,4-bis(methoxymethoxy)cyclopentyl-2-methylalaninamide	90 K	None	429-431 K	colorless	None	None	None	None	Y.Demizu, M.Doi, H.Yamashita, T.Misawa, M.Oba, M.Kurihara, H.Suemune, M.Tanaka
GAVLUL	CHIRAL	Enantiopure	NO	NO	P1	1	TRUE	FALSE	4.44	1	1	3	C	3	3	2	1	0	(1, RSR)	1	1	chiral	C1	1	1	1	W1_enantiopure AU	contains following chiral atom(s)C	NA	NA	6.1397	7.6596	11.1439	72.484	89.979	85.553	498.122	1.36486	C24 H21 F2 N1 O3	(2R*,3R*,6S*)-N,6-bis(4-Fluorophenyl)-2-(4-hydroxyphenyl)-3,4,5,6-tetrahydro-2H-pyran-3-carboxamide	at 273 K	None	None	colorless	None	None	methanol	None	G.Y.S.K.Swamy, K.Ravikumar, L.K.Wadhwa, R.Saxena, S.Singh
GAWDUG	CHIRAL	Enantiopure	NO	NO	P1	1	TRUE	FALSE	3.73	2	1	2	C	2	2	2	0	0	(2, R)	1	2	chiral	C1	2	2	2	Wa-could be Diast	contains following chiral atom(s)C	NA	NA	10.9103	12.8039	12.816	94.2055	104.224	112.073	1580.65	1.25813	C42 H34 O2 Si1	di-1-naphthylmethyl 2-(triphenylsilyl)propanoate	150 K	None	None	colorless	None	None	None	None	Y.Nakagawa, S.Chanthamath, I.Fujisawa, K.Shibatomi, S.Iwasa
GAYDET	CHIRAL	Enantiopure	NO	NO	P1	1	TRUE	FALSE	2.79	1	1	1	P	0	0	1	0	0	(1, R)	1	1	chiral	C1	1	1	1	W2_enantiopure AU	contains following chiral atom(s)P	NA	NA	5.9802	7.6226	8.4206	70.706	74.365	89.487	347.529	1.24359	C15 H17 O2 P1	2-{2-methyl(phenyl)phosphorylphenyl}ethan-1-ol	293.1 K	None	None	colorless	None	None	None	None	Yanli Li, Xiao Jin, Peng Liu, Haijuan Zhang, Xiuling Yu, Yanjuan Liu, Baixue Liu, Wenqiang Yang
GEFNAK	CHIRAL	Enantiopure	NO	NO	P1	1	TRUE	FALSE	4.54	2	1	16	C	16	10	12	4	0	(2, RRRRRSSR)	1	2	chiral	C1	2	2	2	Wa-could be Diast	contains following chiral atom(s)C	NA	NA	7.4681	10.8872	16.6263	80.965	83.804	79.339	1307.67	1.16499	C30 H50 O3	Inobliqus A	100.0 K	None	None	colorless	None	None	None	None	Yan-Mei Wei, Li Yang, Hao Wang, Cai-Hong Cai, Zhi-Bao Chen, Hui-Qin Chen, Wen-Li Mei, Hao-Fu Dai
GEFQEO	CHIRAL	Enantiopure	NO	NO	P1	1	TRUE	FALSE	3.61	1	1	5	C	5	4	2	3	0	(1, SSRRS)	1	1	chiral	C1	1	1	1	W1_enantiopure AU	contains following chiral atom(s)C	NA	NA	8.22	9.013	9.635	68.718	74.078	63.603	590.314	1.20266	C24 H36 F3 N1 O2	(2S,2S,4aS,7R,8aR)-2-(3-Benzyl-4,4,7-trimethyloctahydro-2H-benzo(e)(1,3)oxazin-2-yl)-1,1,1-trifluorohexan-2-ol	at 298 K	None	381-382 K	colorless	None	None	methanol	None	R.Pedrosa, S.Sayalero, M.Vicente, A.Maestro
GEFVIA	CHIRAL	Enantiopure + achiral molecule	NO	NO	P1	1	TRUE	FALSE	3.48	1	1	6	C	6	3	3	3	0	(1, SSSRRR)	1	1	chiral	C1	2	1	1	W1_enantiopure AU	contains following chiral atom(s)C	NA	NA	6.5559	6.5688	10.5341	92.382	99.933	112.215	410.83	1.27882	C16 H26 O5,H2 O1	3-hydroxy-1-(2,6,8-trihydroxy-1,2,6-trimethyl-1,2,4a,5,6,7,8,8a-octahydronaphthalen-1-yl)propan-1-one monohydrate	150 K	None	None	colorless	None	None	None	None	jinshan hu
GEFYOJ	CHIRAL	Enantiopure + achiral molecule	NO	NO	P1	1	TRUE	FALSE	3.98	2	1	16	C	16	10	12	4	0	(2, RRRSRSRR)	1	2	chiral	C1	6	2	2	Wa-could be Diast	contains following chiral atom(s)C	NA	NA	10.0155	10.9995	11.4081	79.293	77.923	75.88	1179.74	1.46799	C22 H22 O11,C2 H3 N1,H2 O1	6a,8,9,10,13-pentahydroxy-6,17-dimethyl-3,4,6,6a,9,10,11,12-octahydro-2H-12,9-(epoxymethano)-4,14a-methanoanthra2,3-b1,5dioxocine-2,7,14-trione acetonitrile solvate monohydrate	293 K	None	None	None	None	None	None	None	Gui
GEGPAN	CHIRAL	Enantiopure	NO	NO	P1	1	TRUE	FALSE	2.75	1	1	2	C	2	2	2	0	0	(1, RR)	1	1	chiral	C1	1	1	1	W1_enantiopure AU	contains following chiral atom(s)C	NA	NA	8.3244	9.6014	10.9252	106.031	98.183	114.292	731.566	1.29762	C30 H37 N1 O8 S1	diethyl 2-(2,4-dimethylphenyl)-5-(3-ethoxy-3-oxoprop-1-en-2-yl)-1-(4-methylbenzene-1-sulfonyl)pyrrolidine-3,3-dicarboxylate	100 K	None	None	colorless	None	None	None	None	Fuhao Zhang, Xuan Dai, Lei Dai, Wenrui Zheng, Wai-Lun Chan, Xiaodong Tang, Xumu Zhang, Yixin Lu
GEHBUR	CHIRAL	Enantiopure + achiral molecule	NO	NO	P1	1	TRUE	FALSE	4.72	1	1	8	C	8	0	0	8	0	(1, SSSSSSSS)	1	1	chiral	C2	3	1	1	W1_enantiopure AU	contains following chiral atom(s)C	NA	NA	8.87	12.009	12.744	116.294	88.966	101.443	1189.07	1.44117	C32 H40 N8 S8,2(C1 H1 Cl3)	1,5,9,13,17,21,25,29-Octamethyl-3,7,11,15,19,23,27,31-octathia-33,34,35,36,37,38,39,40-octa-azanonacyclo-(28.2.1.12,5.110,13.114,17.118,21.122,25.126,29)-tetraconta-2(40),6(39),10(38),14(37),18(36),22(35),26(34),30(33)-octaene chloroform solvate	at 153 K	None	None	colorless	None	None	None	None	F.S.Han, H.Osajima, M.Cheung, H.Tokuyama, T.Fukuyama
GEHDAY	MESO	+ achiral molecule	NO	NO	P1	1	TRUE	FALSE	3.4	1	1	6	C	6	6	5	1	0	(1, RSRRRR)	1	1	chiral, MESO	C1	2	1	1	W1_enantiopure AU	contains following chiral atom(s)C	NA	NA	5.074	6.599	7.75	106.02	93.47	109.09	232.431	1.51598	C7 H14 O6,H2 O1	(+)-Ononitol monohydrate	None	None	186deg.C	None	None	None	None	None	Shi Kailiang, Li Ruisheng, Zhou Kaihong, Huang Youqing, Hu Sheng-zhi
GEHMUB	CHIRAL	Enantiopure	NO	NO	P1	1	TRUE	FALSE	3	2	1	10	C	10	8	8	2	0	(2, RSRRR)	1	2	chiral	C1	2	2	2	Wa-could be Diast	contains following chiral atom(s)C	NA	NA	7.924	9.711	10.461	92.48	79.39	100.24	778.562	1.31961	C16 H23 N1 O5	(1Î±,7Î²,8Î±-H,12Î±,13Î±,14Î±)-12-Î²-Hydroxycrotalane-11,15-dione	None	None	142-143deg.C	colorless	None	None	None	None	L.W.Smith, J.A.Edgar, R.I.Willing, R.W.Gable, M.F.Mackay, O.P.Suri, C.K.Atal, C.C.J.Culvenor
GEHREU	CHIRAL	Enantiopure	NO	NO	P1	1	TRUE	FALSE	3.6	4	1	8	C	8	8	0	8	0	(4, SS)	1	4	chiral	C1	4	4	4	Wa-could be Diast	contains following chiral atom(s)C	NA	NA	9.9853	14.4769	17.9623	112.831	106.124	90.049	2281.63	1.39849	C26 H26 Br1 N1 O3	3-(benzyloxy)-N-(4-bromophenyl)methyl-2-(4-methoxyphenyl)pent-4-enamide	173 K	None	None	colorless	None	None	None	None	Hua-Chen Lin, G.J.Knox, C.M.Pearson, Chao Yang, V.Carta, T.N.Snaddon
GEHZOK	CHIRAL	Enantiopure	NO	NO	P1	1	TRUE	FALSE	3.72	2	1	4	C	4	4	0	4	0	(2, SS)	1	2	chiral	C1	2	2	2	Wa-could be Diast	contains following chiral atom(s)C	NA	NA	5.38153	10.427	14.8881	103.186	99.305	93.281	798.83	1.21989	C16 H23 N1 O2 S1	3-(1-Hydroxy-3-methylbutyl)-1-(4-methoxyphenyl)pyrrolidine-2-thione	at 93 K	None	None	colorless	None	None	None	None	D.Sureshkumar, Y.Kawato, M.Iwata, N.Kumagai, M.Shibasaki
GEKKIT	CHIRAL	Enantiopure + achiral molecule	NO	NO	P1	1	TRUE	FALSE	4.51	2	1	22	C	22	18	12	10	0	(2, RRSRRSRSSSR)	1	2	chiral	C1	3	2	2	Wa-could be Diast	contains following chiral atom(s)C	NA	NA	8.1221	12.1749	14.1791	105.157	91.59	93.296	1349.77	1.21219	C24 H40 O5,0.5(C9 H12 O3)	3,7,12-trihydroxycholan-24-oic acid hemikis(1,3,5-trimethoxybenzene)	173 K	None	None	colorless	None	None	None	None	J.S.B.Boudiombo, Hong Su, S.A.Bourne, L.R.Nassimbeni
GEMKUH	CHIRAL	Contains at least 2 different chemicals in enantiopure proportions + achiral molecule	NO	NO	P1	1	TRUE	FALSE	3.06	3	2	5	C	5	5	5	0	0	(2, RR), (1, R)	1, 1	2, 1	chiral, chiral	C1	4	1	1	W1_enantiopure AU	contains following chiral atom(s)C	NA	NA	9.4119	9.9078	17.9625	93.2004	92.029	93.0321	1668.83	1.24335	2(C34 H34 O4),C14 H18 O2,H2 O1	bis((-)-(2R,3R)-trans-2,3-bis(hydroxydiphenylmethyl)-1,4-dioxaspiro5.4decane) (R)-(+)-2-(2-benzyloxyethyl)cyclopentan monohydrate	95 K	None	None	colorless	None	None	None	None	H.Kaku, M.Ito, M.Horikawa, T.Tsunoda
GEMLAO	CHIRAL	Contains at least 2 different chemicals in enantiopure proportions	NO	NO	P1	1	TRUE	FALSE	4.27	3	2	5	C	5	5	5	0	0	(2, RR), (1, R)	1, 1	2, 1	chiral, chiral	C1	3	1	1	W1_enantiopure AU	contains following chiral atom(s)C	NA	NA	9.5233	10.1019	16.2071	83.1599	84.6149	89.3561	1541.25	1.24489	2(C34 H34 O4),C8 H14 O2	bis((-)-(2R,3R)-trans-2,3-bis(hydroxydiphenylmethyl)-1,4-dioxaspiro5.4decane) (R)-(+)-2-(2-methoxyethyl)cyclopentanone	103 K	None	None	colorless	None	None	None	None	H.Kaku, M.Ito, M.Horikawa, T.Tsunoda
GEMYIH	CHIRAL	Enantiopure	NO	NO	P1	1	TRUE	FALSE	3.51	1	1	3	C	3	3	3	0	0	(1, RRR)	1	1	chiral	C1	1	1	1	W1_enantiopure AU	contains following chiral atom(s)C	NA	NA	5.8939	8.5144	11.3355	82.108	87.448	82.337	558.231	1.19119	C23 H29 O4 P1	t-Butyl 2-(1-(diphenylphosphoryloxy)propyl)cyclopropane-1-carboxylate	at 180 K	None	None	colorless	None	None	None	None	D.J.Fox, D.S.Pedersen, S.Warren
GENGAK	ACHIRAL	+ achiral molecule	NO	NO	P1	1	TRUE	FALSE	2.62	0	0	0	No Chiral atom	0	0	0	0	0						2	1	1	NA	contains following chiral atom(s)No Chiral atom	NA	NA	7.5373	8.032	9.1361	112.869	90.241	95.621	506.63	1.88614	C16 H12 Br2 N2 O4,C1 H1 Cl3	6,11-dibromo-2,3-dihydro-4a,12b-(epoxyethanooxy)1,4dioxino2,3-f1,10phenanthroline chloroform solvate	291 K	None	None	colorless	None	None	None	None	Yu-Xin Peng, Yi-Tao Gan, Tao Tao, Hui-Fen Qian, Wei Huang
GENRID	CHIRAL	Enantiopure + achiral molecule	NO	NO	P1	1	TRUE	FALSE	3.27	2	1	6	C	6	4	6	0	0	(2, RRR)	1	2	chiral	C1	4	2	2	Wa-could be Diast	contains following chiral atom(s)C	NA	NA	9.0112	9.8045	10.2163	89.964	78.459	76.61	859.334	1.24225	C19 H24 N2 O1,0.5(C1 H4 O1),0.5(H2 O1)	14,15-dihydroeburnamenin-14-ol methanol solvate hemihydrate	145 K	None	386-388 K	colorless	None	None	None	None	Kam-Weng Chong, J.S.-Y.Yeap, Siew-Huah Lim, J.-F.F.Weber, Yun-Yee Low, T.-S.Kam
GEPMIB	ACHIRAL	+ achiral molecule	NO	NO	P1	1	TRUE	FALSE	4.95	0	0	0	No Chiral atom	0	0	0	0	0						4	4	4	NA	contains following chiral atom(s)No Chiral atom	NA	NA	7.95355	9.21984	24.963	84.7922	88.1032	88.5825	1821.56	1.33608	C24 H18 N2 O2	1-methyl-2-3-(4-phenoxyphenyl)furan-2-yl-1H-benzimidazole	100.0 K	None	None	colorless	None	None	None	None	K.E.Shepelenko, K.A.Nikolaeva, I.G.Gnatiuk, O.G.Garanzha, A.A.Alexandrov, M.E.Minyaev, V.M.Chernyshev
GERMIC	CHIRAL	Enantiopure	NO	NO	P1	1	TRUE	FALSE	4.6	2	1	2	C	2	2	2	0	0	(2, R)	1	2	chiral	C1	2	2	2	Wa-could be Diast	contains following chiral atom(s)C	NA	NA	11.322	7.873	7.476	110.7	102.33	99.32	588.085	1.45851	C15 H14 O4	Germichrysone	None	None	None	dark yellow	None	None	None	None	H.Noguchi, U.Sankawa, Y.Iitaka
GERNEX	CHIRAL	Enantiopure + achiral molecule	NO	NO	P1	1	TRUE	FALSE	4.34	2	1	10	C	10	4	2	8	0	(2, SSRSS)	1	2	chiral	C1	3	2	2	Wa-could be Diast	contains following chiral atom(s)C	NA	NA	10.042	10.674	11.045	63.87	75.05	78.5	1021.89	1.21365	C20 H28 O6,0.5(H2 O1)	1Î±-Angeloyloxy-8Î², 10Î²-dihydroxyeremophil-7(11)-en-8Î±,12-olide hemihydrate	at 293 K	None	94-95 deg.C	colorless	None	None	None	None	E.Burgueno-Tapia, B.Hernandez-Carlos, P.Joseph-Nathan
GESXOU	CHIRAL	Enantiopure	NO	NO	P1	1	TRUE	FALSE	2.89	2	1	4	C	4	4	0	4	0	(2, SS)	1	2	chiral	C1	2	2	2	Wa-could be Diast	contains following chiral atom(s)C	NA	NA	7.4536	7.4603	13.6011	79.6877	89.2981	69.3688	695.305	1.38698	C15 H18 N2 O2 S1	3-benzyl-2-methyldihydro-2H,6H-pyrazino1,2-c1,3thiazine-1,4(3H,8H)-dione	150 K	None	None	colorless	None	None	None	None	M.Budesinsky, I.Cisarova, F.Borremans, J.C.Martins, E.Pauwels
GESYUA	CHIRAL	Enantiopure	NO	NO	P1	1	TRUE	FALSE	4.51	2	1	2	C	2	2	2	0	0	(2, R)	1	2	chiral	C1	2	2	2	Wa-could be Diast	contains following chiral atom(s)C	NA	NA	8.8278	8.9741	14.7343	102.024	96.09	92.8	1132.2	1.52791	C20 H17 Cl1 F4 N4 O4 S1	N2-((4-Chlorophenyl)sulfonyl)-5,5,5-trifluoro-N2-(2-fluoro-4-(1,2,4-oxadiazol-3-yl)benzyl)norvalinamide	at 296 K	None	None	None	None	None	None	None	A.F.Stepan, C.Subramanyam, I.V.Efremov, J.K.Dutra, T.J.OSullivan, K.J.DiRico, W.S.McDonald, A.Won, P.H.Dorff, C.E.Nolan, S.L.Becker, L.R.Pustilnik, D.R.Riddell, G.W.Kauffman, B.L.Kormos, Liming Zhang, Yasong Lu, S.H.Capetta, M.E.Green, K.Karki, E.Sibley, K.P.Atchison, A.J.Hallgren, C.E.Oborski, A.E.Robshaw, B.Sneed, C.J.ODonnell
GETBEM	CHIRAL	Enantiopure	NO	NO	P1	1	TRUE	FALSE	4.94	2	1	10	C	10	6	8	2	0	(2, SRRRR)	1	2	chiral	C1	2	2	2	Wa-could be Diast	contains following chiral atom(s)C	NA	NA	7.3125	12.0072	12.0244	111.428	94.947	100.571	952.471	1.06864	C20 H34 O2	2-((+)-Camphor-3-ylmethylcarboxy)-2-hydroxybornane	None	None	77-79deg.C	colorless	None	None	None	None	J.W.Huffman, R.H.Wallace, W.T.Pennington
GETDAO	CHIRAL	Enantiopure	NO	NO	P1	1	TRUE	FALSE	3.82	4	1	8	C	8	8	4	4	0	(4, SR)	1	4	chiral	C1	4	4	4	Wa-could be Diast	contains following chiral atom(s)C	NA	NA	8.0677	12.0503	16.4213	103.148	96.81	91.635	1541.09	1.23415	C17 H19 F1 N2 O1	N-(E)-(6,6-dimethylbicyclo3.1.1hept-2-en-2-yl)methylidene-2-fluorobenzohydrazide	100 K	None	453-454 K	colorless	None	None	ethyl acetate / cyclohexane	None	M.Garberova, I.Potocnak, M.Tvrdonova, M.Bago-Pilatova, S.Bekesova, Z.Kudlickova, E.Samolova, A.Keselakova, J.Elecko, M.Vilkova
GETDIW	CHIRAL	Enantiopure	NO	NO	P1	1	TRUE	FALSE	4.84	4	1	8	C	8	8	4	4	0	(4, SR)	1	4	chiral	C1	4	4	4	Wa-could be Diast	contains following chiral atom(s)C	NA	NA	8.1194	9.4211	19.7816	89.816	82.141	82.838	1487.11	1.19859	C17 H20 N2 O1	N-(E)-(6,6-dimethylbicyclo3.1.1hept-2-en-2-yl)methylidene-4-fluorobenzohydrazide	100 K	None	499-501 K	colorless	None	None	ethyl acetate / cyclohexane	None	M.Garberova, I.Potocnak, M.Tvrdonova, M.Bago-Pilatova, S.Bekesova, Z.Kudlickova, E.Samolova, A.Keselakova, J.Elecko, M.Vilkova
GETZUD	CHIRAL	Enantiopure	NO	NO	P1	1	TRUE	FALSE	4.72	2	1	4	C	4	4	0	4	0	(2, SS)	1	2	chiral	C1	2	2	2	Wa-could be Diast	contains following chiral atom(s)C	NA	NA	9.7608	10.6134	11.2721	77.398	75.589	87.635	1103.64	1.33435	C23 H24 F2 N3 O2 P1	N-{bis(1-phenylethyl)aminophosphoryl}-2,6-difluorobenzamide	120 K	None	None	colorless	None	None	None	None	M.Eghbali Toularoud, M.Pourayoubi, M.Dusek, V.Eigner, K.Damodaran
GEVBAN	CHIRAL	Enantiopure	NO	NO	P1	1	TRUE	FALSE	3.94	2	1	4	C	4	4	4	0	0	(2, RR)	1	2	chiral	C1	2	2	2	Wa-could be Diast	contains following chiral atom(s)C	NA	NA	9.7524	10.6117	11.251	77.3381	75.6221	87.7313	1100.33	1.33838	C23 H24 F2 N3 O2 P1	N-{bis(1-phenylethyl)aminophosphoryl}-2,6-difluorobenzamide	95 K	None	None	colorless	None	None	None	None	M.Eghbali Toularoud, M.Pourayoubi, M.Dusek, V.Eigner, K.Damodaran
GEVHOI	CHIRAL	Enantiopure	NO	NO	P1	1	TRUE	FALSE	3.83	2	1	4	C	4	4	2	2	0	(2, RS)	1	2	chiral	C1	2	2	2	Wa-could be Diast	contains following chiral atom(s)C	NA	NA	8.78	8.92	11.62	84.56	81.25	76.39	872.551	1.42497	C20 H22 O7	2,3,8-trimethoxy-9-methyl-5,6a,7,12a-tetrahydro2benzopyrano4,3-b1benzopyran-4,10-diol	100 K	None	None	green	None	None	None	None	Kenneth Zhang
GEXQIJ	CHIRAL	Enantiopure	NO	NO	P1	1	TRUE	FALSE	3.8	2	1	4	C	4	4	0	4	0	(2, SS)	1	2	chiral	C1	2	2	2	Wa-could be Diast	contains following chiral atom(s)C	NA	NA	4.283	10.97	13.593	70.23	82.94	80.32	590.956	1.65857	C13 H11 Br1 O3	(3aS,8bS)-(-)-Methyl 3a,8b-cis-dihydro-3H-7-bromocyclopenta(b)benzofuran-5-carboxylate	None	None	None	None	None	None	None	None	H.Wakita, H.Yoshiwara, A.Tajima, Y.Kitano, H.Nagase
GEYDUL	CHIRAL	Enantiopure	NO	NO	P1	1	TRUE	FALSE	3.37	2	1	2	C	2	2	0	2	0	(2, S)	1	2	chiral	C1	2	2	2	Wa-could be Diast	contains following chiral atom(s)C	NA	NA	7.392	7.4342	11.7274	98.503	98.135	103.85	608.256	1.36099	C12 H15 N3 O3	Ethyl (2Z)-2-(8aS)-4-oxo-1,2,6,7,8,8a-hexahydropyrrolo1,2-apyrazin-3-ylidene-2-cyanoacetate	at 160 K	None	486 K	pale yellow	None	None	None	None	G.Mloston, A.M.Pieczonka, A.Wroblewska, A.Linden, H.Heimgartner
GEYFEX	CHIRAL	Enantiopure	NO	NO	P1	1	TRUE	FALSE	2.34	1	1	3	C	3	3	1	2	0	(1, SRS)	1	1	chiral	C1	1	1	1	W1_enantiopure AU	contains following chiral atom(s)C	NA	NA	6.1041	10.7152	10.9998	60.869	81.304	82.503	619.881	1.41296	C27 H24 Cl2 N2 O3 S1	(4-Chlorophenyl)(3-(4-chlorophenyl)-4-oxo-1-(1-phenylethyl)-2-thioxohexahydropyrimidin-5-yl)methyl acetate	at 150 K	None	None	colorless	None	None	None	None	V.Kumar, K.Kumar, Anang Pal, G.L.Khatik, V.A.Nair
GEYMEC	CHIRAL	Enantiopure	NO	NO	P1	1	TRUE	FALSE	5	1	1	10	C	10	10	5	5	0	(1, RSSSRRSRSR)	1	1	chiral	C1	1	1	1	W1_enantiopure AU	contains following chiral atom(s)C	NA	NA	8.018	9.834	11.24	78.51	80.64	85.68	856.093	1.26204	C27 H38 O16 S1	3,5-Di-O-acetyl-6-S-(2,3,4,6-tetra-O-acetyl-Î²-D-glucopyranosyl)-6-deoxy-1,2-O-isopropylidene-6-thio-Î±-D-glucofuranose	None	None	None	None	None	None	None	None	G.B.Carpenter, H.Kristen
GEZPAG	CHIRAL	Enantiopure	NO	NO	P1	1	TRUE	FALSE	4.13	1	1	3	C	3	1	2	1	0	(1, RSR)	1	1	chiral	C1	1	1	1	W1_enantiopure AU	contains following chiral atom(s)C	NA	NA	7.94	8.6313	9.5767	71.676	66.821	73.661	563.33	1.42782	C28 H22 Br1 N1 O2	3-(4-bromophenyl)-1,9a-dimethyl-3,9a-dihydrospirofluorene-2,3-indole-2,9(1H,1H)-dione	193 K	None	None	None	None	None	None	None	ye zhang
GIBXOH	ACHIRAL	+ achiral molecule	NO	NO	P1	1	TRUE	FALSE	4.85	0	0	0	No Chiral atom	0	0	0	0	0						4	2	2	NA	contains following chiral atom(s)No Chiral atom	NA	NA	4.8655	6.4488	21.972	89.864	89.453	75.707	668.037	1.46321	C13 H12 N2 O3 S1,H2 O1	(E)-N-(2-hydroxy-4-methoxybenzylidene)thiophene-2-carbohydrazide monohydrate	153 K	None	None	None	None	None	Re-crystallisation from solvent	None	M.Mohan, Srikala Pangannaya, M.N.Satyanarayan, D.R.Trivedi
GIFDIL	CHIRAL	Enantiopure	NO	NO	P1	1	TRUE	FALSE	4.8	2	1	4	C	4	2	0	4	0	(2, SS)	1	2	chiral	C1	2	2	2	Wa-could be Diast	contains following chiral atom(s)C	NA	NA	8.5416	10.3731	12.3695	109.138	103.068	105.684	935.268	1.42847	C20 H20 Br1 N1 O3	methyl 3-(3-(4-bromobenzyl)-2-oxo-2,3-dihydro-1H-indol-3-yl)butanoate	289 K	None	None	None	None	None	None	None	Lin Chen, Yong You, Ming-Liang Zhang, Jian-qiang Zhao, Jian Zuo, Xiao-Mei Zhang, Wei-Cheng Yuan, Xiao-Ying Xu
GIGNAN	CHIRAL	Enantiopure + achiral molecule	NO	NO	P1	1	TRUE	FALSE	2.81	1	1	3	C	3	3	2	1	0	(1, RSR)	1	1	chiral	C1	3	1	1	W1_enantiopure AU	contains following chiral atom(s)C	NA	NA	4.7968	7.1425	9.6965	100.09	96.843	94.552	323.033	1.44582	C9 H15 N3 O5,2(H2 O1)	1-4-(1,2R,3S,4R-tetrahydroxybutyl)-1H-imidazol-2-ylethanone oxime dihydrate	at 100 K	None	None	colorless	None	None	None	None	Haiming Zhang, Jie Yan, M.S.Bednarz, G.Hernandez, Yuelie Lu, L.F.Courtney, Jason Chen, Weifeng Hu, Renmao Liu, Xiaogen Yang, Wenxue Wu
GIGNOB	CHIRAL	Enantiopure	NO	NO	P1	1	TRUE	FALSE	4.04	2	1	8	C	8	8	2	6	0	(2, SSSR)	1	2	chiral	C1	2	2	2	Wa-could be Diast	contains following chiral atom(s)C	NA	NA	5.2387	10.613	15.421	105.843	96.764	94.424	813.694	1.2952	C17 H19 N1 O5	(6-Acetyl-4-(allyloxy)-3-oxa-6-azabicyclo3.1.0hex-2-yl)methyl benzoate	at 173 K	None	None	colorless	None	None	None	None	Md Faiaz Ahmed, T.L.Lowary
GIGWUS	CHIRAL	Enantiopure	NO	NO	P1	1	TRUE	FALSE	3.69	2	1	6	C	6	4	4	2	0	(2, SRR)	1	2	chiral	C1	2	2	2	Wa-could be Diast	contains following chiral atom(s)C	NA	NA	7.8644	9.6116	10.9589	76.142	73.64	89.932	769.746	1.14928	C16 H26 O3	2-2-(4-hydroxy-2,6,6-trimethylcyclohex-1-en-1-yl)ethenyl-2-methyloxolan-3-ol	190 K	None	None	None	None	None	None	None	Qiannan Xu, Wenjing Tian, Shoulun He, Mi Zhou, Yue Gao, Xiangzhong Liu, Cuiling Sun, Rong Ding, Guanghui Wang, Haifeng Chen
GIJGUE	CHIRAL	Enantiopure	NO	NO	P1	1	TRUE	FALSE	4.11	2	1	8	C	8	4	6	2	0	(2, SRRR)	1	2	chiral	C1	2	2	2	Wa-could be Diast	contains following chiral atom(s)C	NA	NA	8.756	8.92	10.487	86.225	81.663	77.246	789.935	1.26292	C19 H24 O3	benzyl 1,2,3-trimethyl-5-oxobicyclo2.2.2octane-2-carboxylate	123 K	None	None	white	None	None	None	None	R.Bruckner, A.-C.Losche
GIJGUF	CHIRAL	Enantiopure	NO	NO	P1	1	TRUE	FALSE	3.74	2	1	6	C	6	6	0	6	0	(2, SSS)	1	2	chiral	C1	2	2	2	Wa-could be Diast	contains following chiral atom(s)C	NA	NA	8.4704	10.5953	13.1722	95.152	93.48	95.479	1169.14	1.62863	C24 H32 Br2 F1 N3 O2	5,6-dibromo-1-(2-fluoroethyl)-3-{3-(hydroxymethyl)-1-(spiro2.5octan-4-yl)methylpiperidin-4-yl}-1,3-dihydro-2H-benzimidazol-2-one	100.2 K	None	None	colorless	None	None	None	None	A.L.Rheingold
GIJMEV	CHIRAL	Enantiopure	NO	NO	P1	1	TRUE	FALSE	3.64	1	1	2	C	2	0	0	2	0	(1, SS)	1	1	chiral	C1	1	1	1	W1_enantiopure AU	contains following chiral atom(s)C	NA	NA	6.378	7.4348	8.5655	73.589	84.608	64.643	351.913	1.27555	C13 H22 N2 O4	3-acetamido-1,2,2-trimethyl-3-(methylcarbamoyl)cyclopentanecarboxylic acid	296 K	None	556 K	colorless	None	None	None	None	M.Gorichko
GIJPIY	CHIRAL	Enantiopure + achiral molecule	NO	NO	P1	1	TRUE	FALSE	4.4	1	1	4	C	4	4	4	0	0	(1, RRRR)	1	1	chiral	C1	3	1	1	W1_enantiopure AU	contains following chiral atom(s)C	NA	NA	7.995	11.035	13.371	68.34	74.62	82.84	1056.63	1.18135	C40 H48 O10,H6 B1 N1,0.75(C1 H4 O1)	2,3,11,12-Tetra-anisyl-18-crown-6 ammonia-borane methanol solvate	None	None	None	None	None	None	None	None	D.A.Pears, H.Shahriari-Zavareh, J.F.Stoddart, J.Crosby, B.L.Allwood, D.J.Williams
GIMCAI	CHIRAL	Enantiopure	NO	NO	P1	1	TRUE	FALSE	3.31	1	1	2	C	2	2	2	0	0	(1, RR)	1	1	chiral	C1	1	1	1	W1_enantiopure AU	contains following chiral atom(s)C	NA	NA	7.2077	7.7905	9.264	112.558	107.791	91.734	450.937	1.44819	C19 H21 Br1 O4	Dimethyl (5S,6S)-6-(3-bromophenyl)-5-isopropylcyclohexa-1,3-diene-1,3-dicarboxylate	at 230.3 K	None	None	colorless	None	None	None	None	B.Pezzati, M.Chellat, J.J.Murphy, C.Besnard, G.Reginato, J.C.Stephens, A.Alexakis
GINRII	CHIRAL	Enantiopure	NO	NO	P1	1	TRUE	FALSE	2.19	1	1	2	C	2	2	2	0	0	(1, RR)	1	1	chiral	C1	1	1	1	W1_enantiopure AU	contains following chiral atom(s)C	NA	NA	8.022	8.2914	10.1712	76.898	85.404	62.195	582.577	1.24429	C30 H28 O3	t-butyl 2-(2-formyl-3-phenyl-1H-inden-1-yl)(phenyl)methylprop-2-enoate	100 K	None	None	colorless	None	None	None	None	A.Cieslinski, S.Frankowski, L.Albrecht
GIPBEM	CHIRAL	Enantiopure	NO	NO	P1	1	TRUE	FALSE	4.9	2	1	8	C	8	8	2	6	0	(2, SSSR)	1	2	chiral	C1	2	2	2	Wa-could be Diast	contains following chiral atom(s)C	NA	NA	4.857	10.071	16.889	97.48	95.56	90.19	815.133	1.42731	C16 H18 N2 O7	3-Benzyloxy-1-Î²-D-ribofuranosylpyrazole-4-carboxylic acid	None	None	411 K	None	None	None	None	None	Y.S.Sanghvi, K.G.Upadhya, N.K.Dalley, R.K.Robins, G.R.Revankar
GIPRII	CHIRAL	Enantiopure + achiral molecule	NO	NO	P1	1	TRUE	FALSE	4.03	2	1	8	C	8	8	6	2	0	(2, RRSR)	1	2	chiral	C1	5	2	2	Wa-could be Diast	contains following chiral atom(s)C	NA	NA	9.4373	12.8563	17.2237	90.693	100.759	99.515	2022.76	1.27559	C45 H41 N5 O4,C1 H4 O1,0.5(C3 H6 O1)	25,29-Dibenzyl-27-(2-hydroxyphenyl)-8-oxa-16,23,26,28,31-penta-azapentacyclo14.10.4.110,14.02,7.017,22hentriaconta-2,4,6,10(31),11,13,17,19,21-nonaene-24,30-dione acetone methanol solvate	at 110 K	None	None	colorless	None	None	None	None	Shengnan Guo, Guo Wang, Lin Ai
GIPTAA	ACHIRAL	+ achiral molecule	NO	NO	P1	1	TRUE	FALSE	3.88	0	0	0	No Chiral atom	0	0	0	0	0						2	2	2	NA	contains following chiral atom(s)No Chiral atom	NA	NA	8.304	5.667	5.683	102.48	75.96	104.07	248.129	0.896684	C1 H7 B3 O1	Triborane(7)-carbonyl	at -113 deg.C	None	-93 deg.C	None	None	None	None	H5 deleted; suspected coordinate error	J.D.Glore, J.W.Rathke, K.Schaeffer
GIQPOP	CHIRAL	Enantiopure	NO	NO	P1	1	TRUE	FALSE	4.87	1	1	5	C	5	4	0	5	0	(1, SSSSS)	1	1	chiral	C1	1	1	1	W1_enantiopure AU	contains following chiral atom(s)C	NA	NA	6.4778	8.1459	10.1467	71.796	86.666	82.824	504.531	1.23262	C26 H30 O2	3-(benzyloxy)estra-1,3,5(10)-triene-17-carbaldehyde	103 K	None	None	colorless	None	None	None	None	Tobias Schierling, B.Tosi, C.Eisenhardt, Sophie Reining, C.G.Daniliuc, C.Brenker, T.Strunker, B.Wunsch
GISGIZ	CHIRAL	Enantiopure	NO	NO	P1	1	TRUE	FALSE	4.6	2	1	2	C	2	0	0	2	0	(2, S)	1	2	chiral	C1	2	2	2	Wa-could be Diast	contains following chiral atom(s)C	NA	NA	6.1642	11.2018	11.6915	115.936	100.621	95.362	699.58	1.155	C12 H21 N1 O4	t-Butyl N-((S)-3-isobutyl-2-oxo-oxetan-3-yl)carbamate	at 293 K	None	382-383 K	colorless	None	None	acetone	None	L.Sieron, A.Kudaj, A.Olma, J.Karolak-Wojciechowska
GIVXUF	CHIRAL	Enantiopure + achiral molecule	NO	NO	P1	1	TRUE	FALSE	4.71	2	1	10	C	10	10	4	6	0	(2, SRSSR)	1	2	chiral	C1	7	2	2	Wa-could be Diast	contains following chiral atom(s)C	NA	NA	7.6575	11.2094	11.8749	79.967	87.988	72.164	955.284	1.62485	C19 H18 O11,2.5(H2 O1)	2-Î²-D-glucopyranosyl-1,3,6,7-tetrahydroxy-9H-xanthen-9-one hydrate	at 150 K	None	513 K	yellow	None	None	ethanol/water	None	J.W.da Cruz Junior, L.R.de Moraes, M.H.dos Santos, G.A.da Silva, M.R.P.L.Brigagao, J.Ellana, A.C.Doriguetto
GIVXUF01	CHIRAL	Enantiopure + achiral molecule	NO	NO	P1	1	TRUE	FALSE	4.46	2	1	10	C	10	10	6	4	0	(2, RSRRS)	1	2	chiral	C1	7	2	2	Wa-could be Diast	contains following chiral atom(s)C	NA	NA	7.6952	11.207	11.998	80.281	88.445	72.484	972.262	1.59648	C19 H18 O11,2.5(H2 O1)	1,3,6,7-tetrahydroxy-2-3,4,5-trihydroxy-6-(hydroxymethyl)oxan-2-yl-9H-xanthen-9-one hydrate	273.1 K	None	None	None	None	None	None	None	Ruiqing Long, Cui Tang, Qisheng Wei, Chaoying Tong, Xia Tong, Shuyun Shi, Ying Guo, Yahui Yang
GIWVER	CHIRAL	Enantiopure	NO	NO	P1	1	TRUE	FALSE	3.86	1	1	1	C	1	1	1	0	0	(1, R)	1	1	chiral	C1	1	1	1	W2_enantiopure AU	contains following chiral atom(s)C	NA	NA	9.253	9.3566	9.9037	106.668	101.698	117.979	665.243	1.3445	C32 H27 F1 N2 O3 S1	N-(2-3-(4-fluorophenyl)-3-oxoprop-1-en-1-yl-1-methyl-1H-indol-3-yl)(phenyl)methyl-4-methylbenzene-1-sulfonamide	302 K	None	None	yellowish yellow	None	None	None	None	Bo Jiang, Wu-Tao Gui, Hao-Tian Wang, Ke Xie, Zhi-Chao Chen, Lei Zhu, Qin Ouyang, Wei Du, Ying-Chun Chen
GIXNAC	ACHIRAL	+ achiral molecule	NO	NO	P1	1	TRUE	FALSE	4.92	0	0	0	No Chiral atom	0	0	0	0	0						2	2	2	NA	contains following chiral atom(s)No Chiral atom	NA	NA	10.02	14.848	9.57	104.98	96.86	76.95	1337.06	1.23349	C33 H28 N4 O1	bis(1-Methyl-4,5-diphenylimidazol-2-yl)methanol	None	None	503-505 K	colorless	None	None	dichloromethane/ethanol	Data given for sg P-1, but in the paper the structure is shown in the sg P1 with 2 molecules in the asymmetric unit. Data in P1 sg has been sent by authors	R.Bhalla, M.Helliwell, R.L.Beddoes, D.Collison, C.D.Garner
GIXPAE	ACHIRAL	+ achiral molecule	NO	NO	P1	1	TRUE	FALSE	4.3	0	0	0	No Chiral atom	0	0	0	0	0						3	1	1	NA	contains following chiral atom(s)No Chiral atom	NA	NA	10.3654	12.1845	7.5077	92.503	97.772	93.561	936.377	1.23573	C30 H28 N2 O4,2(C7 H8 O1)	anti-N,N-bis(2-t-Butylphenyl)pyromellitic di-imide bis(p-cresol) clathrate	None	None	decomposes at 433.9 K	yellow	None	None	None	None	K.Kishikawa, S.Tsubokura, S.Kohmoto, M.Yamamoto
GIXREK	ACHIRAL	+ achiral molecule	NO	NO	P1	1	TRUE	FALSE	4.5	0	0	0	No Chiral atom	0	0	0	0	0						3	1	1	NA	contains following chiral atom(s)No Chiral atom	NA	NA	11.278	11.879	7.9492	95.743	97.154	102.08	1024.51	1.24623	C30 H28 N2 O4,2(C10 H8 O1)	anti-N,N-bis(2-t-Butylphenyl)pyromellitic di-imide bis(Î±-naphthol) clathrate	None	None	decomposes at 485.9 K	orange	None	None	None	None	K.Kishikawa, S.Tsubokura, S.Kohmoto, M.Yamamoto
GIYPEJ	CHIRAL	Enantiopure	NO	NO	P1	1	TRUE	FALSE	2.53	1	1	3	C	3	2	3	0	0	(1, RRR)	1	1	chiral	C1	1	1	1	W1_enantiopure AU	contains following chiral atom(s)C	NA	NA	7.264	7.302	9.939	85.98	72.53	78.9	493.415	1.29374	C21 H24 N2 O5	(3R,4R)-4-((1R)-1-Hydroxyethyl)-3-((2-hydroxymethylbenzoyl)amino)-1- (4-methoxyphenyl)-2-azetidinone	None	None	451K	colorless	None	None	None	None	Gy Argay, A.Kalman
GIZKEI	CHIRAL	Enantiopure	NO	NO	P1	1	TRUE	FALSE	4.09	2	1	2	C	2	2	2	0	0	(2, R)	1	2	chiral	C1	2	2	2	Wa-could be Diast	contains following chiral atom(s)C	NA	NA	5.7997	7.802	10.7127	101.38	93.123	94.168	472.779	1.2729	C10 H12 F1 N1 O1	N-benzyl-2-fluoropropanamide	100 K	None	None	colorless	None	None	None	None	E.Cosimi, N.Trapp, M.-O.Ebert, H.Wennemers
GOCLIV	ACHIRAL	+ achiral molecule	NO	NO	P1	1	TRUE	FALSE	4.66	0	0	0	No Chiral atom	0	0	0	0	0						2	1	1	NA	contains following chiral atom(s)No Chiral atom	NA	NA	7.3823	8.4674	10.4894	77.886	86.838	87.937	639.904	1.43938	C16 H14 N2 O4 S2,C15 H12	2,6-Dicyclobutyl-1H,5H-pyrrolo3,4:5,61,4dithiino2,3-cpyrrole-1,3,5,7(2H,6H)-tetrone 9-methylanthracene	at 173 K	None	None	red	None	None	None	None	S.Khorasani, M.A.Fernandes
GOCQAT	CHIRAL	Enantiopure	NO	NO	P1	1	TRUE	FALSE	2.58	2	1	2	C	2	2	0	2	0	(2, S)	1	2	chiral	C1	2	2	2	Wa-could be Diast	contains following chiral atom(s)C	NA	NA	5.4639	10.6881	13.4596	78.594	81.459	89.929	761.634	1.4407	C17 H18 N2 O3 S1	5-(benzenecarbonyl)-2-benzyl-1,2,6-thiadiazinane-1,1-dione	100.0 K	None	None	colorless	None	None	None	None	Chaoqun Li, Kai Lang, Hongjian Lu, Yang Hu, Xin Cui, L.Wojtas, X.Peter Zhang
GOFTIF	ACHIRAL	+ achiral molecule	NO	NO	P1	1	TRUE	FALSE	4.5	0	0	0	No Chiral atom	0	0	0	0	0						1	1	1	NA	contains following chiral atom(s)No Chiral atom	NA	NA	7.926	8.244	8.709	98.323	96.18	103.915	540.499	1.42392	C20 H17 N1 O8 S2	2-Nitro-p-phenylene-1,4-bis(toluenesulfonate)	at 294 K	None	415 K	colorless	None	None	chloroform	None	Xiujie Ji, Bowen Cheng, Jun Song, Chao Liu
GOJHIW	CHIRAL	Enantiopure	NO	NO	P1	1	TRUE	FALSE	3.2	1	1	2	C	2	2	0	2	0	(1, SS)	1	1	chiral	C1	1	1	1	W1_enantiopure AU	contains following chiral atom(s)C	NA	NA	5.021	8.911	9.43	74.74	83.75	75.1	392.972	1.30723	C15 H23 N3 O4	L-Tyrosyl-L-lysine	None	None	None	None	None	None	None	None	L.Urpi, M.Coll, J.A.Subirana
GOLPII	CHIRAL	Enantiopure	NO	NO	P1	1	TRUE	FALSE	2.34	1	1	5	C	5	5	1	4	0	(1, RSSSS)	1	1	chiral	C1	1	1	1	W1_enantiopure AU	contains following chiral atom(s)C	NA	NA	6.4513	8.0413	8.3415	74.668	69.467	71.102	377.801	1.44316	C12 H16 N4 O5 S1	methyl 4-azido-2,2-dimethyl-5-oxohexahydro-3aH-1,3dioxolo4,5-c1,3thiazolo3,2-apyridine-7-carboxylate	173 K	None	None	colorless	None	None	None	None	B.Eckhardt, A.Geyer, K.Harms, M.Marsch
GOPQEJ	CHIRAL	Enantiopure	NO	NO	P1	1	TRUE	FALSE	4.05	3	1	12	C	12	12	12	0	0	(3, RRRR)	1	3	chiral	D2	3	3	3	Wa-could be Diast	contains following chiral atom(s)C	NA	NA	7.0255	14.6532	22.0962	86.353	87.271	80.237	2235.66	1.54344	C40 H28 N4 O8	1,8,21,28-tetraazaundecacyclo31.7.1.18,16.113,21.128,36.02,7.010,15.014,19.022,27.030,35.034,39tetratetraconta-10,12,14,16,18,30,32,34,36,38-decaene-9,20,29,40,41,42,43,44-octone	100 K	None	None	yellow	None	None	dichloromethane/acetonitrile	None	Yilei Wu, M.Frasconi, D.M.Gardner, P.R.McGonigal, S.T.Schneebeli, M.R.Wasielewski, J.Fraser Stoddart
GOVNOU	CHIRAL	Enantiopure	NO	NO	P1	1	TRUE	FALSE	3.84	1	1	8	C	8	8	5	3	0	(1, RSRSSRRR)	1	1	chiral	C1	1	1	1	W1_enantiopure AU	contains following chiral atom(s)C	NA	NA	7.921	10.277	12.448	71.79	82.98	79.65	944.537	1.30787	C38 H45 N7 O5 S2	Lissoclinamide 7	None	None	None	None	None	None	None	The space group reported in the supplementary data is P1 not P-1 as stated in the paper	P.Wipf, P.C.Fritch, S.J.Geib, A.M.Sefler
GOVTAO	CHIRAL	Enantiopure	NO	NO	P1	1	TRUE	FALSE	3.02	2	1	2	C	2	2	0	2	0	(2, S)	1	2	chiral	C1	2	2	2	Wa-could be Diast	contains following chiral atom(s)C	NA	NA	6.25441	12.592	13.6185	100.755	92.7028	95.0674	1047.35	1.33963	C24 H26 N2 O5	1,4-dibenzyl-6-(2-(2-methyl-1,3-dioxolan-2-yl)ethyl)piperazine-2,3,5-trione	at 100.0 K	None	None	colorless	None	None	None	None	A.Cabanillas, C.D.Davies, L.Male, N.S.Simpkins
GOVZEZ	CHIRAL	Enantiopure	NO	NO	P1	1	TRUE	FALSE	3.36	2	1	20	C	20	12	10	10	0	(2, RSRSSSRRRS)	1	2	chiral	C1	2	2	2	Wa-could be Diast	contains following chiral atom(s)C	NA	NA	7.43158	12.6411	16.6155	68.6576	84.8142	83.4169	1442.29	1.3416	C32 H38 O10	1-(furan-3-yl)-6-hydroxy-10-(1-hydroxy-2-methoxy-2-oxoethyl)-9,10a,12a-trimethyl-3-oxo-1,3,6,7a,8,9,10,10a,10b,11,12,12a-dodecahydro-6,9-methanocyclopentaapyrano4,3-g3benzoxepin-13-yl 2-methylbut-2-enoate	100 K	None	None	colorless	None	None	None	None	D.R.Solipeta, S.Bandi, S.P.B.Vemulapalli, P.M.C.Pallavi, S.Vemireddy, S.Balasubramania, S.K.H.Mahabalarao, S.B.Katragadda
GOWBIG	CHIRAL	Enantiopure + achiral molecule	NO	NO	P1	1	TRUE	FALSE	4.32	3	1	30	C	30	18	18	12	0	(3, RRSRRSSRRS)	1	3	chiral	C1	6	3	3	Wa-could be Diast	contains following chiral atom(s)C	NA	NA	7.3195	16.8609	21.8814	69.35	87.717	83.935	2512.8	1.12174	C31 H50 O4,C5 H5 N1	23-hydroxy-3-methoxy-9,19-cyclolanost-24-en-26-oic acid pyridine solvate	292.4 K	None	None	colorless	None	None	None	None	Wen-Jun Wei, Qiu-Yan Song, Jin-Chuan Ying, Hang-Ying Li, Kai-Liang Ma, Yida Li, Ya Li, Kun Gao
GOWGOR	CHIRAL	Enantiopure + achiral molecule	NO	NO	P1	1	TRUE	FALSE	3.66	2	1	10	C	10	8	6	4	0	(2, RRSRS)	1	2	chiral	C1	4	2	2	Wa-could be Diast	contains following chiral atom(s)C	NA	NA	9.3591	12.5274	12.547	74.614	88.037	88.948	1417.45	1.2204	C29 H36 O7,0.75(C1 H4 O1)	3a-(acetyloxy)-11-hydroxy-2,5,8,8,12-pentamethyl-4,9-dioxo-2,3,3a,4,7,8,9,10,11,13a-decahydro-1H-cyclopenta12annulen-1-yl benzoate methanol solvate	173 K	None	None	colorless	None	None	None	None	Jun-Cheng Su, Wen Cheng, Jian-Guo Song, Yuan-Lin Zhong, Xiao-Jun Huang, Ren-Wang Jiang, Yao-Lan Li, Man-Mei Li, Wen-Cai Ye, Ying Wang
GRAYTZ	CHIRAL	Enantiopure	NO	NO	P1	1	TRUE	FALSE	3.8	2	1	14	C	14	10	8	6	0	(2, RRRSSSR)	1	2	chiral	C1	2	2	2	Wa-could be Diast	contains following chiral atom(s)C	NA	NA	10.406	10.648	8.003	90	94.25	102.76	862.357	1.2264	C20 H30 O3	Grayanotoxin xix	None	None	405-406 K	colorless	None	None	None	None	A.Furusaki, S.Gasa, R.Ikeda, T.Matsumoto, N.Yasuoka, Y.Matsuura
GRISFL14	CHIRAL	Enantiopure	NO	NO	P1	1	TRUE	FALSE	2.58	4	1	8	C	8	4	4	4	0	(4, SR)	1	4	chiral	C1	4	4	4	Wa-could be Diast	contains following chiral atom(s)C	NA	NA	11.176	11.8633	12.6435	79.844	89.188	83.786	1640.35	1.42843	C17 H17 Cl1 O6	7-chloro-2,4,6-trimethoxy-6-methyl-3H,4H-spiro1-benzofuran-2,1-cyclohex2ene-3,4-dione	100 K	None	478 K	colorless	polymorph III	None	None	None	Ming Lu
GRISFL15	CHIRAL	Enantiopure	NO	NO	P1	1	TRUE	FALSE	2.63	4	1	8	C	8	4	4	4	0	(4, SR)	1	4	chiral	C1	4	4	4	Wa-could be Diast	contains following chiral atom(s)C	NA	NA	11.2153	11.8671	12.6727	79.874	89.166	83.731	1650.43	1.41971	C17 H17 Cl1 O6	7-chloro-2,4,6-trimethoxy-6-methyl-3H,4H-spiro1-benzofuran-2,1-cyclohex2ene-3,4-dione	153.0 K	None	478 K	colorless	polymorph III	None	None	None	Ming Lu
GRISFL16	CHIRAL	Enantiopure	NO	NO	P1	1	TRUE	FALSE	3.01	4	1	8	C	8	4	4	4	0	(4, SR)	1	4	chiral	C1	4	4	4	Wa-could be Diast	contains following chiral atom(s)C	NA	NA	11.354	11.911	12.7608	79.844	89.195	83.473	1687.66	1.38839	C17 H17 Cl1 O6	7-chloro-2,4,6-trimethoxy-6-methyl-3H,4H-spiro1-benzofuran-2,1-cyclohex2ene-3,4-dione	298.0 K	None	478 K	colorless	polymorph III	None	None	None	Ming Lu
GUDMOI	CHIRAL	Enantiopure	NO	NO	P1	1	TRUE	FALSE	3.78	2	1	4	P	0	0	0	4	0	(2, SS)	1	2	chiral	C1	2	2	2	Wa-could be Diast	contains following chiral atom(s)P	NA	NA	8.8864	9.7663	13.739	84.651	74.529	73.472	1101.49	1.80671	C21 H20 N2 P2 Se3	2,5-Diphenyl-N-(2-phenylethyl)-2,5-dihydro-1,3,2,5-selenazadiphosphol-4-amine 2,5-diselenide	at 93 K	None	406-407 K	yellow	None	None	None	None	Guoxiong Hua, Qingzhi Zhang, Yang Li, A.M.Z.Slawin, J.D.Woollins
GUGHOH	ACHIRAL	+ achiral molecule	NO	NO	P1	1	TRUE	FALSE	4.84	0	0	0	No Chiral atom	0	0	0	0	0						1	1	1	NA	contains following chiral atom(s)No Chiral atom	NA	NA	6.1461	7.3648	14.031	76.834	82.082	72.763	588.953	1.77182	C31 H10 F10 N4	3-Methyl-6,12-bis(pentafluorophenyl)-3H-2,3,8a,9-tetraazatetracyclopentab,ef,h,klheptalene	100 K	None	None	brown	None	None	None	None	S.C.Gadekar, B.K.Reddy, V.G.Anand
GUHCES	ACHIRAL	+ achiral molecule	NO	NO	P1	1	TRUE	FALSE	4.06	0	0	0	No Chiral atom	0	0	0	0	0						1	1	1	NA	contains following chiral atom(s)No Chiral atom	NA	NA	4.7681	6.7538	12.0351	92.75	94.681	102.983	375.518	1.54668	C19 H12 Cl1 N3 O2	4-Chloro-8,15-dihydro-1H-quino8,1:2,3,41,4oxazocino6,7-bquinoxalin-1-one	at 296 K	None	None	yellowish	None	None	None	None	P.Paira, R.Paira, A.Hazra, S.Naskar, K.B.Sahu, P.Saha, S.Mondal, A.Maity, S.Banerjee, N.B.Mondal
GUKDAU	CHIRAL	Enantiopure	NO	NO	P1	1	TRUE	FALSE	2.91	1	1	5	C	5	5	3	2	0	(1, RSRSR)	1	1	chiral	C1	1	1	1	W1_enantiopure AU	contains following chiral atom(s)C	NA	NA	5.6782	11.7351	12.7603	115.226	101.818	93.6185	741.943	1.3688	C31 H33 N1 O12	1-acetyl-5-benzyloxy-1H-indol-3-yl 2,3,4,6-tetra-O-acetyl-Î²-D-glucopyranoside	100 K	None	None	colorless	None	None	hexanes/dichloromethane	None	H.Fujita, Yunlong Zhang, Zhiyuan Wu, J.S.Lindsey
GUKXOZ	CHIRAL	Enantiopure	NO	NO	P1	1	TRUE	FALSE	3.19	2	1	2	C	2	2	0	2	0	(2, S)	1	2	chiral	C1	2	2	2	Wa-could be Diast	contains following chiral atom(s)C	NA	NA	10.328	11.605	14.796	70	86.37	76.19	1617.95	1.32329	C33 H36 N6 O8	N-(t-Butoxycarbonylglycyl-Î±,Î²-dehydrophenylalanylglycylphenylalanyl)-4-nitroaniline	at 105 K	None	None	yellow	None	None	ethyl acetate/diethyl ether/hexane	None	K.Ejsmont, M.Makowski, J.Zaleski
GULPUY	CHIRAL	Enantiopure	NO	NO	P1	1	TRUE	FALSE	4.7	3	1	9	C Si	6	6	6	3	0	(3, RRS)	1	3	chiral	C1	3	3	3	Wa-could be Diast	contains following chiral atom(s)C,Si	NA	NA	14.8474	14.8549	10.8778	104.141	104.073	114.257	1954.4	1.20234	C33 H33 N1 Si1	(bis((R)-1-Phenylethyl)amino)((S)-1-naphthyl)phenylmethylsilane	None	None	124.0-125.0 deg.C	colorless	None	None	hexane	None	A.Kawachi, H.Maeda, K.Mitsudo, K.Tamao
GULZAQ	CHIRAL	Enantiopure	NO	NO	P1	1	TRUE	FALSE	2.78	1	1	3	C	3	2	2	1	0	(1, RRS)	1	1	chiral	C1	1	1	1	W1_enantiopure AU	contains following chiral atom(s)C	NA	NA	5.8519	6.0331	11.7433	102.305	92.4551	117.588	354.189	1.50596	C10 H18 Cl2 O5 S1	(2R,3S,4R)-Dichloro-4,5-isopropylidenedioxy-2-methylpentan-1-methanesulfonate	at 143 K	None	None	colorless	None	None	None	None	C.V.Vogel, H.Pietraszkiewicz, O.M.Sabry, W.H.Gerwick, F.A.Valeriote, C.D.Vanderwal
GUMCEY	RACEMATE	Strict definition of kryptoracemate + achiral molecule	KRYPTORACEMIC	NO	P1	1	TRUE	FALSE	2.71	2	1	8	C	8	6	4	4	0	(1, RSRS), (1, SRSR)	2	2	racemic	C1	3	2	2	RAC-1	contains following chiral atom(s)C	NA	NA	7.3829	9.9311	16.9977	89.569	78.232	71.925	1157.79	1.44973	C25 H21 Br1 N2 O2,0.5(C4 H8 O2)	3-acetyl-6-bromo-4,5-diphenylspiroindole-3,2-pyrrolidin-2(1H)-one ethyl acetate	at 120 K	None	None	colorless	None	None	None	None	Chuqin Peng, Jiwei Ren, Jun-An Xiao, Honggang Zhang, Hua Yang, Yiming Luo
GUMDUQ	CHIRAL	Enantiopure	NO	NO	P1	1	TRUE	FALSE	3.42	4	1	8	C	8	4	4	4	0	(4, RS)	1	4	chiral	C1	4	4	4	Wa-could be Diast	contains following chiral atom(s)C	NA	NA	10.1492	10.1392	25.2626	96.515	96.515	107.35	2435.42	1.49859	C25 H23 F4 N5 O5	N-(1-{2-7-fluoro-3-(trifluoromethyl)-2,3-dihydro-1,4-benzoxazepin-4(5H)-yl-2-oxoethyl}-2,5-dioxo-2,3-dihydrospiroimidazolidine-4,1-inden-5-yl)-N-methylurea	173 K	None	None	colorless	None	None	None	None	Yaxi Yang, Rukang Zhang, Zhaojun Li, Lianghe Mei, Shili Wan, Hong Ding, Zhifeng Chen, Jing Xing, Huijin Feng, Jie Han, Hualiang Jiang, Mingyue Zheng, Cheng Luo, Bing Zhou
GUMWET	CHIRAL	Enantiopure	NO	NO	P1	1	TRUE	FALSE	2.91	1	1	8	C	8	3	5	3	0	(1, RSSRSRRR)	1	1	chiral	C1	1	1	1	W1_enantiopure AU	contains following chiral atom(s)C	NA	NA	7.0005	7.3078	10.9418	71.334	87.561	84.38	527.734	1.28235	C23 H37 N1 O5	(-)-3-methoxy-18-(methylamino)-3,9-epoxypregn-7-ene-11,14,21-triol	180.0 K	None	None	colorless	None	None	None	None	Yinliang Guo, Zhixian Guo, Jia-Tian Lu, Runting Fang, Si-Cong Chen, Tuoping Luo
GUQKIN	CHIRAL	Enantiopure	NO	NO	P1	1	TRUE	FALSE	4.16	2	1	4	C	4	4	2	2	0	(2, SR)	1	2	chiral	C1	2	2	2	Wa-could be Diast	contains following chiral atom(s)C	NA	NA	8.061	10.513	11.444	67.43	80.858	87.369	884.051	1.26738	C20 H19 N1 O4	(S)-2-((R)-1-(4-Nitrophenyl)-3-oxo-3-phenylpropyl)cyclopentanone	at 296 K	None	404-405 K	colorless	None	None	petroleum ether/ethyl acetate	None	Junfeng Wang, Xin Wang, Zemei Ge, Tieming Cheng, Runtao Li
GURBIG	CHIRAL	Enantiopure	NO	NO	P1	1	TRUE	FALSE	3.05	2	1	10	C	10	8	0	10	0	(2, SSSSS)	1	2	chiral	C1	2	2	2	Wa-could be Diast	contains following chiral atom(s)C	NA	NA	6.7128	9.2273	22.4255	86.47	83.099	89.5329	1376.38	1.15746	C34 H41 N1 O1	N,N-dibenzyl-1-(3-methoxyestra-1,3,5(10)-trien-17-yl)methanamine	100 K	None	None	colorless	None	None	None	None	Shaolin Zhu, S.L.Buchwald
GURFAD	CHIRAL	Enantiopure + achiral molecule	NO	NO	P1	1	TRUE	FALSE	4.17	2	1	10	C	10	8	4	6	0	(2, SRSSR)	1	2	chiral	C1	4	2	2	Wa-could be Diast	contains following chiral atom(s)C	NA	NA	6.2685	8.1906	22.287	85.22	87.267	89.338	1138.97	1.37307	C22 H25 Cl1 O8,H2 O1	{2-chloro-5-3,4,5-trihydroxy-6-(hydroxymethyl)-2-methoxyoxan-2-ylphenyl}(4-ethoxyphenyl)methanone monohydrate	293 K	None	None	None	None	None	None	THIS IS A HARDCOPY DEPOSITION	Lin Hu, Ping Zou, Wanguo Wei, Xi-Meng Yuan, Xiao-Long Qiu, Shao-Hua Gou
GURRIW	CHIRAL	Enantiopure	NO	NO	P1	1	TRUE	FALSE	2.49	1	1	2	C	2	0	2	0	0	(1, RR)	1	1	chiral	C1	1	1	1	W1_enantiopure AU	contains following chiral atom(s)C	NA	NA	5.8864	9.254	12.6617	104.549	95.9357	105.233	633.458	1.21546	C26 H41 N1 O4 S1	1-methyl-5-((2-methyl-1,3-dioxolan-2-yl)methyl)-3-((2,4,6-triisopropylphenyl)sulfonyl)-3-azabicyclo3.1.0hexane	120 K	None	None	colorless	None	None	None	None	B.M.Trost, M.C.Ryan, M.Rao, T.Z.Markovic
GUTXAW	CHIRAL	Enantiopure	NO	NO	P1	1	TRUE	FALSE	3.06	1	1	1	C	1	0	1	0	0	(1, R)	1	1	chiral	C1	1	1	1	W2_enantiopure AU	contains following chiral atom(s)C	NA	NA	6.8482	7.9264	8.7986	92.069	99.774	96.704	466.688	1.48506	C21 H14 Cl2 O1 S2	5-chloro-2-((4-chlorophenyl)sulfanyl)-2-(phenylsulfanyl)indan-1-one	296 K	None	None	colorless	None	None	None	None	Kui Liao, Feng Zhou, Jin-Sheng Yu, Wei-Ming Gao, Jian Zhou
GUVBUU	CHIRAL	Enantiopure	NO	NO	P1	1	TRUE	FALSE	3.49	1	1	8	C	8	4	4	4	0	(1, RRSSRSRS)	1	1	chiral	C1	1	1	1	W1_enantiopure AU	contains following chiral atom(s)C	NA	NA	6.248	7.131	11.521	85.285	76.957	73.272	478.826	1.41653	C20 H24 O7 S1	(15R,SR)-Epipodolactone D	at 296 K	None	474-476 K	colorless	None	None	None	None	Hyun-Sun Park, Y.Takahashi, H.Fukaya, Y.Aoyagi, K.Takeya
GUVRIB	CHIRAL	Enantiopure	NO	NO	P1	1	TRUE	FALSE	4.3	2	1	2	C	2	2	2	0	0	(2, R)	1	2	chiral	C1	2	2	2	Wa-could be Diast	contains following chiral atom(s)C	NA	NA	7.8579	11.3749	11.4596	68.33	89.439	88.361	951.511	1.31036	C20 H21 N7 O1	2-(3-methylmorpholin-4-yl)-4-(1-methyl-1H-pyrazol-5-yl)-8-(1H-pyrazol-5-yl)-1,7-naphthyridine	110 K	None	None	light yellow	None	None	None	None	Ulrich Lucking, L.Wortmann, A.M.Wengner, J.Lefranc, Philip Lienau, H.Briem, G.Siemeister, U.Bomer, K.Denner, M.Schafer, M.Koppitz, Knut Eis, F.Bartels, B.Bader, W.Bone, D.Moosmayer, S.J.Holton, U.Eberspacher, J.Grudzinska-Goebel, C.Schatz, Gesa Deeg, D.Mumberg, F.von Nussbaum
GUVROF	CHIRAL	Enantiopure	NO	NO	P1	1	TRUE	FALSE	3.6	3	1	15	C	15	15	12	3	0	(3, RSRRR)	1	3	chiral	C1	3	3	3	Wa-could be Diast	contains following chiral atom(s)C	NA	NA	7.0836	10.832	14.895	96.01	98.85	108.59	1055.84	1.45463	C11 H16 O8 S1	(6,6-Dimethyl-2,2-dioxidotetrahydro-3H-1,3dioxolo4,5furo2,3-d1,2oxathiol-3-yl)methyl acetate	at 296 K	None	378-379 K	colorless	None	None	None	None	Lei Zhang, Guo-Hua Wei, Yu-Guo Du
GUWFEL	CHIRAL	Enantiopure	NO	NO	P1	1	TRUE	FALSE	2.83	1	1	2	C	2	1	0	2	0	(1, SS)	1	1	chiral	C1	1	1	1	W1_enantiopure AU	contains following chiral atom(s)C	NA	NA	7.1747	7.9625	8.5502	69.509	84.347	75.715	443.367	1.36452	C18 H21 O6 P1	Diethyl ((2S.3S)-5-oxo-2-phenyl-2,3,4,5-tetrahydro-2,3-bifuran-2-yl)phosphonate	100.0 K	None	None	colorless	None	None	dichloromethane/hexanes	None	Ki Po Jang, G.E.Hutson, R.C.Johnston, E.O.McCusker, P.H.-Y Cheong, K.A.Scheidt
GUWJIS	CHIRAL	Enantiopure	NO	NO	P1	1	TRUE	FALSE	3.6	2	1	4	C S	2	2	2	2	0	(2, RS)	1	2	chiral	C1	2	2	2	Wa-could be Diast	contains following chiral atom(s)C,S	NA	NA	9.8937	10.0435	19.1219	86.839	83.024	84.547	1875.66	1.20711	C42 H45 B1 N1 O1 P1 S1 Si1	(Diphenyl(1-phenyl-2-(N-(t-butyldiphenylsilyl)-S-phenylsulfonimidoyl)ethyl)phosphine)-borane	at 293 K	None	None	colorless	None	None	None	None	F.Lemasson, H.-J.Gais, J.Runsink, G.Raabe
GUWZAC	CHIRAL	Enantiopure	NO	NO	P1	1	TRUE	FALSE	2.75	4	1	4	C	4	4	0	4	0	(4, S)	1	4	chiral	C1	4	4	4	Wa-could be Diast	contains following chiral atom(s)C	NA	NA	10.298	10.8963	12.8723	112.985	101.971	100.376	1244.94	1.42086	C13 H14 O4 S1	2-(1-hydroxypropan-2-yl)sulfanyl-5-methoxy-4H-1-benzopyran-4-one	100 K	None	None	colorless	None	None	None	None	M.P.Beller, K.Harms, U.Koert
GUYZUX	ACHIRAL	+ achiral molecule	NO	NO	P1	1	TRUE	FALSE	4.39	0	0	0	No Chiral atom	0	0	0	0	0						1	1	1	NA	contains following chiral atom(s)No Chiral atom	NA	NA	5.6674	8.267	9.097	101.836	101.813	92.712	406.541	1.23496	C21 H19 P1	(2-(4-methylphenyl)vinyl)(diphenyl)phosphine	200 K	None	None	colorless	None	None	None	None	M.Itazaki, S.Katsube, M.Kamitani, H.Nakazawa
GUZVIG	ACHIRAL	+ achiral molecule	NO	NO	P1	1	TRUE	FALSE	4.62	0	0	0	No Chiral atom	0	0	0	0	0						2	2	2	NA	contains following chiral atom(s)No Chiral atom	NA	NA	10.4238	11.404	14.704	101.117	108.382	90.023	1624.08	1.16092	C24 H60 N9 P3	2,2,4,4,6,6-hexakis(t-Butylamino)cyclotriphosphazene	at 150 K	None	437 K	colorless	None	None	from the melt	None	J.F.Bickley, R.Bonar-Law, G.T.Lawson, P.I.Richards, F.Rivals, A.Steiner, S.Zacchini
HACQOV01	CHIRAL	Enantiopure	NO	NO	P1	1	TRUE	FALSE	4.57	2	1	2	C	2	2	0	2	0	(2, S)	1	2	chiral	C1	2	2	2	Wa-could be Diast	contains following chiral atom(s)C	NA	NA	6.4692	9.917	15.316	76.271	79.621	84.521	937.476	1.52821	C17 H16 F3 N3 O5 S1	(S)-2-(2-methyl-1,4-dioxa-8-azaspiro4.5decan-8-yl)-8-nitro-6-(trifluoromethyl)-4H-1,3-benzothiazin-4-one	296 K	None	465-466 K	pale yellow	None	None	None	None	A.Richter, M.Patzer, R.Goddard, J.B.Lingnau, Peter Imming, R.W.Seidel
HADBUJ	CHIRAL	Enantiopure	NO	NO	P1	1	TRUE	FALSE	4.25	2	1	4	C	4	2	0	4	0	(2, SS)	1	2	chiral	C1	2	2	2	Wa-could be Diast	contains following chiral atom(s)C	NA	NA	10.159	13.533	10.016	108.1	102.92	96.3	1251.65	1.30165	C28 H26 O6 S1	(1S,3S)-3-Acetyl-5-methoxy-3-methylthio-1,2,3,4-tetrahydronaphthalene-1,8-diyl dibenzoate	None	None	None	Colorless	None	None	None	None	S.Kamei, Y.Sakai, Y.Ohashi, A.Adachi, K.Tanino, I.Kuwajima
HADWOC	CHIRAL	Enantiopure	NO	NO	P1	1	TRUE	FALSE	3.68	1	1	1	C	1	1	0	1	0	(1, S)	1	1	chiral	C1	1	1	1	W2_enantiopure AU	contains following chiral atom(s)C	NA	NA	5.1578	8.9611	9.5418	92.623	103.752	95.143	425.624	1.27748	C19 H21 N1 O2 S1	4-methyl-N-(2-propyl-1H-inden-1-yl)benzene-1-sulfonamide	170.0 K	None	None	colorless	None	None	None	None	Xiang Wu, Du Ding, Ying Zhang, Hua-Jie Jiang, Tao Wang, Li-Ping Zhao
HAGFAW	CHIRAL	Enantiopure	NO	NO	P1	1	TRUE	FALSE	2.9	1	1	4	C	4	4	2	2	0	(1, SSRR)	1	1	chiral	C1	1	1	1	W1_enantiopure AU	contains following chiral atom(s)C	NA	NA	9.047	11.45	5.031	100.1	98	86.47	507.713	1.38477	C18 H22 N4 O8	3-(Benzoxycarbonyl-alanyl-aspartyl)oxirane-2-amide	None	None	None	None	None	None	None	None	D.F.Rane, V.M.Girijavallabhan, A.K.Ganguly, R.E.Pike, A.K.Saksena, A.T.McPhail
HAGYUK	ACHIRAL	+ achiral molecule	NO	NO	P1	1	TRUE	FALSE	3.66	0	0	0	No Chiral atom	0	0	0	0	0						1	1	1	NA	contains following chiral atom(s)No Chiral atom	NA	NA	7.4573	7.9472	11.748	96.859	104.061	108.599	625.253	1.40886	C30 H18 N4 O6	(S)-2,2-bis(4-Nitro-2-pyridyloxy)-1,1-binaphthalene	at 293 K	None	None	colorless	None	None	methanol	None	Ruihu Wang, Lijin Xu, Gang Chen, Zhongyuan Zhou, Maochun Hong, Rong Cao, A.S.C.Chan
HAHQOX	CHIRAL	Contains at least 2 different chemicals in enantiopure proportions	NO	NO	P1	1	TRUE	FALSE	3.53	2	2	7	C	7	6	4	3	0	(1, R), (1, SRSRSR)	1, 1	1, 1	chiral, chiral	C1	2	1	1	W1_enantiopure AU	contains following chiral atom(s)C	NA	NA	9.201	10.321	10.888	100.753	91.279	103.235	986.537	1.35484	C23 H26 N2 O4,C24 H26 O6	2,3-Dimethoxystrychnidin-10-one (3R)-3-(1,4-dimethoxy-3-methyl-2-naphthyl)-3-(4-(methoxymethoxy)phenyl)propanoic acid	at 93.2 K	None	356.5-357.5 K	colorless	None	None	None	None	T.Ikemoto, T.Nagata, M.Yamano, T.Ito, Y.Mizuno, K.Tomimatsu
HAJBID	CHIRAL	Enantiopure	NO	NO	P1	1	TRUE	FALSE	3.3	2	1	4	C	4	4	2	2	0	(2, SR)	1	2	chiral	C1	2	2	2	Wa-could be Diast	contains following chiral atom(s)C	NA	NA	4.8125	12.9148	13.8862	86.962	89.12	88.044	861.267	1.33563	C19 H22 O6	Tetra-O-methyl-(+)-catechin	None	None	416-417 K	colorless	None	None	None	None	F.R.Fronczek, R.W.Hemingway, G.W.McGraw, J.P.Steynberg, C.A.Helfer, W.L.Mattice
HAJBID01	CHIRAL	Enantiopure	NO	NO	P1	1	TRUE	FALSE	3.6	2	1	4	C	4	4	2	2	0	(2, SR)	1	2	chiral	C1	2	2	2	Wa-could be Diast	contains following chiral atom(s)C	NA	NA	4.775	12.6499	13.8519	86.976	89.007	87.736	834.785	1.378	C19 H22 O6	2-(3,4-Dimethoxyphenyl)-5,7-dimethoxy-chroman-3-ol	90 K	None	417-418 K	colorless	None	None	None	None	F.R.Fronczek
HAKDEG	CHIRAL	Contains at least 2 different chemicals in enantiopure proportions + achiral molecule	NO	NO	P1	1	TRUE	FALSE	4.6	2	2	10	C	10	10	8	2	0	(1, RRRRS), (1, RRRRS)	1, 1	1, 1	chiral, chiral	C1	4	1	1	W1_enantiopure AU	contains following chiral atom(s)C	NA	NA	6.4511	9.6269	12.1719	103.314	90.464	94.967	732.539	1.34137	C15 H23 N3 O2,C15 H22 N2 O3,2(H2 O1)	9-aminomatridine-10,15-dione 9-hydroxymatridine-10,15-dione hydrate	150 K	None	None	colorless	None	None	None	None	Ding Luo, Qiang Lin, Jin-Lin Tan, Hai-Yue Zhao, Xiao Feng, Neng-Hua Chen, Zhong-Nan Wu, Chun-Lin Fan, Yao-Lan Li, Wei-Long Ding, Fei Xiao, Guo-Cai Wang, Yu-Bo Zhang
HALXEA	ACHIRAL	+ achiral molecule	NO	NO	P1	1	TRUE	FALSE	4.92	0	0	0	No Chiral atom	0	0	0	0	0						2	2	2	NA	contains following chiral atom(s)No Chiral atom	NA	NA	10.9339	11.3695	14.208	107.602	96.818	109.876	1534.15	1.30483	C33 H39 K1 O8	(1,4,7,10,13,16-hexaoxacyclooctadecane)-(2-methoxy-1,1-binaphthalen-2-olato)-potassium	296.1 K	None	None	colorless	None	None	None	None	Yaqin Cui, Changjuan Chen, Yangyang Sun, Jincai Wu, Xiaobo Pan
HAMDEH	CHIRAL	Enantiopure	NO	NO	P1	1	TRUE	FALSE	4	1	1	4	C	4	2	0	4	0	(1, SSSS)	1	1	chiral	C1	1	1	1	W1_enantiopure AU	contains following chiral atom(s)C	NA	NA	7.5304	7.793	8.782	65.936	67.821	77.035	434.244	1.27122	C20 H28 O4	8a-hydroxy-3,4a,5-trimethyl-4,4a,5,6,7,8,8a,9-octahydronaphtho2,3-bfuran-4-yl 2-methylbut-2-enoate	115 K	None	None	colorless	None	None	None	None	C.L.Cantrell, S.O.Duke, F.R.Fronczek, W.L.A.Osbrink, L.K.Mamonov, J.I.Vassilyev, D.E.Wedge, F.E.Dayan
HAMFIO	ACHIRAL	+ achiral molecule	NO	NO	P1	1	TRUE	FALSE	2.91	0	0	0	No Chiral atom	0	0	0	0	0						4	4	4	NA	contains following chiral atom(s)No Chiral atom	NA	NA	9.6041	12.3867	18.5533	71.809	79.532	81.887	2053.51	1.51801	C23 H20 I1 N1 O2	N-benzyl-2-(2-iodo-6,6-dimethyl1,1-biphenyl-2-yl)-2-oxoacetamide	296.1 K	None	None	light yellow	None	None	None	None	jian han
HAMFOR	CHIRAL	Enantiopure	NO	NO	P1	1	TRUE	FALSE	4.01	4	1	8	C	8	8	8	0	0	(4, RR)	1	4	chiral	C1	4	4	4	Wa-could be Diast	contains following chiral atom(s)C	NA	NA	10.0934	14.2147	15.991	84.789	73.844	77.361	2149.2	1.18842	C25 H24 N2 S1	(R,R)-N,N-bis(1-(1-naphthyl)ethyl)thiourea	at 296 K	None	436-438 K	colorless	None	None	None	None	J.Vazquez, S.Bernes, Y.Reyes, M.Moya, P.Sharma, C.Alvarez, R.Gutierrez
HAMFOS	ACHIRAL	+ achiral molecule	NO	NO	P1	1	TRUE	FALSE	3.58	0	0	0	No Chiral atom	0	0	0	0	0						8	8	8	NA	contains following chiral atom(s)No Chiral atom	NA	NA	7.8817	10.6991	13.7537	91.574	99.497	97.942	1131.44	1.59836	C4 N4 S1	1,2,5-Thiadiazole-3,4-dicarbonitrile	at 173 K	None	328 K	colorless	None	None	None	None	E.A.Suturina, N.A.Semenov, A.V.Lonchakov, I.Yu.Bagryanskaya, Y.V.Gatilov, I.G.Irtegova, N.V.Vasilieva, E.Lork, R.Mews, N.P.Gritsan, A.V.Zibarev
HAMFUX	CHIRAL	Enantiopure	NO	NO	P1	1	TRUE	FALSE	4.43	2	1	16	C	16	16	12	4	0	(2, RRSRRSRR)	1	2	chiral	C1	2	2	2	Wa-could be Diast	contains following chiral atom(s)C	NA	NA	10.3699	11.0903	11.1125	91.047	112.62	111.838	1075.44	1.07647	C21 H36 N2 S1	N,N-bis((1R,2R,3R,5S)-isopinocamph-3-yl)thiourea	at 296 K	None	488-491 K	white	None	None	None	None	J.Vazquez, S.Bernes, Y.Reyes, M.Moya, P.Sharma, C.Alvarez, R.Gutierrez
HAMGAG	CHIRAL	Enantiopure	NO	NO	P1	1	TRUE	FALSE	3.58	2	1	4	C	4	4	4	0	0	(2, RR)	1	2	chiral	C1	2	2	2	Wa-could be Diast	contains following chiral atom(s)C	NA	NA	7.1727	11.2245	13.0783	77.338	85.909	73.221	983.552	1.33178	C23 H20 F2 N2 O2	N-((R)-carbamoylphenylmethyl)-N-(R)-1-(3,5-difluorophenyl)ethylbenzamide	93 K	None	149 deg.C	colorless	None	None	1:2 ethyl acetate:hexane	None	J.Kobayashi, H.Hirasawa, T.Ozawa, T.Ozawa, H.Takeda, Y.Fujimori, O.Nakanishi, N.Kamada, T.Ikeda
HANCAD	CHIRAL	Enantiopure	NO	NO	P1	1	TRUE	FALSE	3.49	2	1	2	C	2	2	2	0	0	(2, R)	1	2	chiral	C1	2	2	2	Wa-could be Diast	contains following chiral atom(s)C	NA	NA	4.1747	10.9965	11.0671	70.466	85.814	80.816	472.573	1.49126	C10 H12 O5	7-(hydroxymethyl)-4-methoxy-7,8-dihydro-2H,5H-pyrano4,3-bpyran-2-one	193 K	None	None	colorless	None	None	None	None	T.El-Elimat, H.A.Raja, C.S.Day, H.McFeeters, R.L.McFeeters, N.H.Oberlies
HANKOA	ACHIRAL	+ achiral molecule	NO	NO	P1	1	TRUE	FALSE	3.61	0	0	0	No Chiral atom	0	0	0	0	0						2	2	2	NA	contains following chiral atom(s)No Chiral atom	NA	NA	7.325	8.4387	14.2741	89.625	87.826	68.045	817.726	1.70679	C18 H11 Br1 F1 N1 O3 S1	3-2-(4-bromophenyl)-2-oxoethyl-5-(2-fluorophenyl)methylidene-1,3-thiazolidine-2,4-dione	273 K	None	None	colorless	None	None	None	None	Juan Sun, Han-Yu Liu, Yi-Heng Zhang, Ze-Yu Fang, Peng-Cheng Lv
HANNOD	CHIRAL	Enantiopure + achiral molecule	NO	NO	P1	1	TRUE	FALSE	2.39	1	1	4	C	4	4	3	1	0	(1, RRSR)	1	1	chiral	C1	2	1	1	W1_enantiopure AU	contains following chiral atom(s)C	NA	NA	5.3166	7.5604	10.2329	70.71	87.629	69.42	362.147	1.48725	C13 H14 N4 O3 S1,H2 O1	2-(4-amino-5-ethynyl-7H-pyrrolo2,3-dpyrimidin-7-yl)-5-(hydroxymethyl)thiolane-3,4-diol monohydrate	294.8 K	None	None	light colorless	None	None	None	None	K.K.Mashelkar, Woong Sub Byun, Hyejin Ko, Kisu Sung, S.K.Tripathi, Seungchan An, Yun A Yum, Jee Youn Kwon, Minjae Kim, G.Kim, Eun-Ji Kwon, Hyuk Woo Lee, M.Noh, Sang Kook Lee, Lak Shin Jeong
HANSEY	CHIRAL	Enantiopure	NO	NO	P1	1	TRUE	FALSE	2.89	1	1	7	C	7	5	5	2	0	(1, RSRRRRS)	1	1	chiral	C1	1	1	1	W1_enantiopure AU	contains following chiral atom(s)C	NA	NA	7.448	7.858	8.154	100.83	103.14	106.95	427.673	1.28292	C20 H26 O4	4,7-dimethyl-2,3,4,4a,5,6,6a,7,10b,12b-decahydro-1H,12H-phenanthro5,4a-bc:6,7-bdifuran-4-carboxylic acid	170 K	None	None	colorless	None	None	None	None	Yue Jin, Miao Wang, Yan-Fang Yan, Xin-Xin Zhang, Xian-Zhe Li, Hui-Yuan Gao
HATTOM	ACHIRAL	+ achiral molecule	NO	NO	P1	1	TRUE	FALSE	4.42	0	0	0	No Chiral atom	0	0	0	0	0						1	1	1	NA	contains following chiral atom(s)No Chiral atom	NA	NA	4.469	6.759	14.267	92.38	91.49	91.47	430.277	1.54666	C19 H13 Cl1 N2 O6	2-Chloro-3-((4-ethoxycarbonyl-2-nitrophenyl)amino)-1,4-naphthoquinone	at 120 K	None	466-468 K	yellow	None	None	chloroform	None	T.Win, S.Yerushalmi, S.Bittner
HATZUX	DIASTEREOMER		NO	NO	P1	1	TRUE	FALSE	4.4	2	1	8	C	8	6	5	3	0	(1, RRSS), (1, RSRR)	2	2	diast	C1	2	2	2	DIAST-1, contains DIAST	contains following chiral atom(s)C	NA	NA	9.6729	10.5434	7.3228	99.85	109.361	98.229	677.965	1.2164	C15 H20 O3	3R-(3Î±,3aÎ²,7Î²,8aÎ±)-1,2,3,7,8,8a-Hexahydro-5-hydroxy-3,6,8,8-tetramethyl-4H-3a,7-methanoazulene-4,9-dione 3R-(3Î±,3aÎ±,7Î±,8aÎ²)-hexahydro-5-hydroxy-3,6,8,8-tetramethyl-4H-3a,7-methanoazulene-4,9-dione	None	None	None	Colorless	None	None	None	None	S.V.Evans, V.C.Yee, M.Garcia-Garibay, J.Trotter
HAWLAV	CHIRAL	Enantiopure + achiral molecule	NO	NO	P1	1	TRUE	FALSE	3.63	2	1	2	C	2	2	2	0	0	(2, R)	1	2	chiral	C1	3	2	2	Wa-could be Diast	contains following chiral atom(s)C	NA	NA	9.9939	10.2957	13.9251	94.7775	100.362	116.113	1243.99	1.32034	C25 H24 N6 O2,0.5(C7 H8 O1)	1-(3-(4-amino-3-(4-phenoxyphenyl)-1H-pyrazolo3,4-dpyrimidin-1-yl)piperidin-1-yl)prop-2-en-1-one methoxybenzene solvate	95 K	None	None	colorless	None	None	anisole	None	V.Zvonicek, E.Skorepova, M.Dusek, M.Babor, P.Zvatora, M.Soos
HAWLUP	CHIRAL	Enantiopure + achiral molecule	NO	NO	P1	1	TRUE	FALSE	2.75	2	1	2	C	2	2	2	0	0	(2, R)	1	2	chiral	C1	3	2	2	Wa-could be Diast	contains following chiral atom(s)C	NA	NA	10.1055	10.459	13.8796	95.399	100.222	116.754	1263.62	1.29723	C25 H24 N6 O2,0.5(C8 H10)	1-(3-(4-amino-3-(4-phenoxyphenyl)-1H-pyrazolo3,4-dpyrimidin-1-yl)piperidin-1-yl)prop-2-en-1-one m-xylene solvate	95 K	None	None	colorless	None	None	m-xylene	None	V.Zvonicek, E.Skorepova, M.Dusek, M.Babor, P.Zvatora, M.Soos
HAWPUQ	CHIRAL	Enantiopure	NO	NO	P1	1	TRUE	FALSE	3.1	1	1	2	C	2	2	1	1	0	(1, RS)	1	1	chiral	C1	1	1	1	W1_enantiopure AU	contains following chiral atom(s)C	NA	NA	5.451	8.9	9.337	116.609	93.297	105.698	381.396	1.43402	C17 H15 N1 O4 S1	N-Tosyl-indano1,2-doxazolidin-2-one	None	None	None	colorless	None	None	dichloromethane/diethyl ether	None	C.Bit, A.A.Mitrochkine, G.Gil, M.Pierrot, M.Reglier
HAZFEU	CHIRAL	Enantiopure	NO	NO	P1	1	TRUE	FALSE	3.78	1	1	4	C	4	4	3	1	0	(1, RSRR)	1	1	chiral	C1	1	1	1	W1_enantiopure AU	contains following chiral atom(s)C	NA	NA	5.319	10.758	12.229	72.38	89.97	87.07	665.982	1.32033	C30 H27 N1 O8	Methyl E-4,7-anhydro-5-benzamido-6,8-di-O-benzoyl-2,3,5-trideoxy-D-allo-oct-2-enoate	at 293 K	None	438 K	white	None	None	dichloromethane/hexane	None	A.Kapor, D.Zobel, M.Strumpel, L.Torovic, M.Popsavin
HAZHEX	CHIRAL	Enantiopure + achiral molecule	NO	NO	P1	1	TRUE	FALSE	4.48	1	1	3	C	3	2	0	3	0	(1, SSS)	1	1	chiral	C1	2	1	1	W1_enantiopure AU	contains following chiral atom(s)C	NA	NA	8.653	9.768	10.149	101.317	102.464	105.508	777.154	1.24502	C31 H30 N2 O4,C4 H8 O2	1-benzyl-6-(1-hydroxyethylidene)-7-(2-methoxyphenyl)-2,3,6,7,8,8a-hexahydro-5H-spiroindole-3,1-indolizine-2,5(1H)-dione ethyl acetate solvate	at 296 K	None	None	white	None	None	Ethyl Acetate/Petroleum ether	None	Xiaoyu Wu, Qin Liu, Huihui Fang, Jie Chen, Weiguo Cao, Gang Zhao
HCARDO01	CHIRAL	Enantiopure	NO	NO	P1	1	TRUE	FALSE	4.9	1	1	9	C	9	6	4	5	0	(1, SSRRSRRSS)	1	1	chiral	C1	1	1	1	W1_enantiopure AU	contains following chiral atom(s)C	NA	NA	7.726	10.224	6.379	84.55	97.46	90.92	497.354	1.25713	C23 H36 O4	(20S)-3Î²,14-Dihydroxy-5Î²,14Î²-cardanolide	None	None	None	None	None	None	None	None	D.C.Rohrer, D.S.Fullerton, K.Yoshioka, E.Kitatsuji, K.Ahmed, A.H.L.From
HCLENE10	CHIRAL	Enantiopure + achiral molecule	NO	NO	P1	1	TRUE	FALSE	4.9	1	1	8	C	8	5	3	5	0	(1, SRRSRSSS)	1	1	chiral	C1	3	1	1	W1_enantiopure AU	contains following chiral atom(s)C	NA	NA	8.438	10.339	7.155	98.37	92.83	97.02	611.492	1.20956	C21 H26 Cl2 O2,2(C1 H4 O1)	2Î±,17Î±-bis(2-Chloroethynyl)-A-nor-5Î±-estrane-2Î²,17Î²-diol methanol solvate	None	None	410K	None	None	None	None	None	F.Baert, M.Foulon, G.Odou
HEBJIH	CHIRAL	Enantiopure + achiral molecule	NO	NO	P1	1	TRUE	FALSE	5	1	1	2	C	2	2	0	2	0	(1, SS)	1	1	chiral	C1	2	1	1	W1_enantiopure AU	contains following chiral atom(s)C	NA	NA	10.436	11.095	8.607	100.46	102.24	110.03	879.261	1.30443	C29 H38 N8 O10,C1 H4 O1	2,4-Dinitrophenyl-valyl-Î±-aminoisobutyryl-glycyl-L-leucyl-p-nitronailine methanol	None	None	205-206deg.C	None	None	None	None	None	T.Yamada, M.Nakao, T.Miyazawa, S.Kuwata, M.Sugiura, Y.In, T.Ishida
HEDQEP	CHIRAL	Enantiopure	NO	NO	P1	1	TRUE	FALSE	4.94	2	1	4	C	4	2	4	0	0	(2, RR)	1	2	chiral	C1	2	2	2	Wa-could be Diast	contains following chiral atom(s)C	NA	NA	7.925	8.141	10.592	104.921	109.227	99.411	599.96	1.52932	C12 H11 F3 O2 S1	(1R,4R)-1-((4-(trifluoromethyl)phenyl)sulfonyl)bicyclo2.1.0pentane	None	None	None	None	None	None	None	None	J.M.Lopchuk, K.Fjelbye, Yu.Kawamata, L.R.Malins, Chung-Mao Pan, R.Gianatassio, Jie Wang, L.Prieto, J.Bradow, T.A.Brandt, M.R.Collins, J.Elleraas, J.Ewanicki, W.Farrell, O.Fadeyi, G.M.Gallego, J.J.Mousseau, R.Oliver, N.W.Sach, J.K.Smith, J.E.Spangler, Huichin Zhu, Jinjiang Zhu, P.S.Baran
HEGVAU	CHIRAL	Enantiopure	NO	NO	P1	1	TRUE	FALSE	4.54	2	1	4	C	4	4	4	0	0	(2, RR)	1	2	chiral	C1	2	2	2	Wa-could be Diast	contains following chiral atom(s)C	NA	NA	9.269	12.293	14.731	104.52	97.42	101.14	1566.17	1.47682	C36 H30 Cl4 N2 O4	5,6,12,13-tetrachloro-2,9-bis((2R)-hexan-2-yl)isoquinolino4,5,6:6,5,10anthra2,1,9-defisoquinoline-1,3,8,10(2H,9H)-tetrone	100 K	None	None	orange	None	None	None	None	Xiaobo Shang, Inho Song, Jeong Hyeon Lee, Wanuk Choi, Jaeyong Ahn, H.Ohtsu, Jin Chul Kim, Jin Young Koo, Sang Kyu Kwak, Joon Hak Oh
HEGYEX	CHIRAL	Enantiopure	NO	NO	P1	1	TRUE	FALSE	3.8	2	1	8	C	8	6	6	2	0	(2, RRRS)	1	2	chiral	C1	2	2	2	Wa-could be Diast	contains following chiral atom(s)C	NA	NA	9.96	25.965	7.5358	94.889	90.464	93.835	1937.22	1.50953	C41 H36 Br2 O12	Methyl 1,6-di-O-(4-bromobenzoyl)-3,4-di-O-(4-methoxycinnamoyl)-Î²-D-fructofuranoside	None	None	None	None	None	None	None	Several bond length discrepancies	N.Ikemoto, G.K.Schulte
HEJCOS	CHIRAL	Enantiopure	NO	NO	P1	1	TRUE	FALSE	4.75	6	1	18	C	18	18	0	18	0	(6, SSS)	1	6	chiral	C1	6	6	6	Wa-could be Diast	contains following chiral atom(s)C	NA	NA	9.861	13.39	23.837	96.96	95.08	105.19	2991.19	1.39681	C21 H27 Br1 N2 O2	(S)-1-{4-(bicyclo2.2.1hept-5-en-2-yl)methylpiperazin-1-yl}-2-(4-bromo-2-methylphenoxy)ethan-1-one	113.2 K	None	None	colorless	None	None	acetone	None	Dawei Wang, Zhili Pang, Haiyang Yu, B.Thiombiano, A.Walmsley, Shuyi Yu, Yingying Zhang, Tao Wei, Lu Liang, Jing Wang, Xin Wen, H.J.Bouwmeester, Ruifeng Yao, Zhen Xi
HENMAS	CHIRAL	Enantiopure	NO	NO	P1	1	TRUE	FALSE	3.85	1	1	1	C	1	1	0	1	0	(1, S)	1	1	chiral	C1	1	1	1	W2_enantiopure AU	contains following chiral atom(s)C	NA	NA	5.359	8.1557	10.8121	104.053	97.042	104.482	435.313	1.12689	C20 H25 N1 O1	N-(2-phenylheptyl)benzamide	293 K	None	None	colorless	None	None	None	None	Lei Zhao, Yuqin Zhu, Mengyuan Liu, Leipeng Xie, Jimin Liang, Haoran Shi, Xiao Meng, Zhengyang Chen, Jian Han, Chao Wang
HESKUM	CHIRAL	Enantiopure	NO	NO	P1	1	TRUE	FALSE	4	1	1	3	C	3	3	0	3	0	(1, SSS)	1	1	chiral	C1	1	1	1	W1_enantiopure AU	contains following chiral atom(s)C	NA	NA	7.8231	9.0594	9.204	119.287	105.764	98.734	515.067	1.11711	C17 H38 N4 O3	(S)-1,4,7-tris(2-Hydroxypropyl)-1,4,7,10-tetraazacyclododecane	at 100 K	None	None	colorless	None	None	hexane	None	R.C.Luckay
HEVZEP	CHIRAL	Enantiopure	NO	NO	P1	1	TRUE	FALSE	4.44	1	1	1	C	1	1	1	0	0	(1, R)	1	1	chiral	C1	1	1	1	W2_enantiopure AU	contains following chiral atom(s)C	NA	NA	5.0685	5.6696	13.5082	97.192	91.116	94.903	383.534	1.33921	C14 H19 N3 O5	t-Butyl (1-((3-nitrophenyl)amino)-1-oxopropan-2-yl)carbamate	at 296 K	None	None	colorless	None	None	None	None	A.D.Konar
HEVZIT	CHIRAL	Enantiopure	NO	NO	P1	1	TRUE	FALSE	3.41	1	1	1	C	1	1	0	1	0	(1, S)	1	1	chiral	C1	1	1	1	W2_enantiopure AU	contains following chiral atom(s)C	NA	NA	5.0385	5.6116	13.3741	97.152	91.665	95.767	372.968	1.37715	C14 H19 N3 O5	t-Butyl (1-((3-nitrophenyl)amino)-1-oxopropan-2-yl)carbamate	at 296 K	None	None	colorless	None	None	None	None	A.D.Konar
HEYZAQ	CHIRAL	Enantiopure	NO	NO	P1	1	TRUE	FALSE	3.44	1	1	1	C	1	1	0	1	0	(1, S)	1	1	chiral	C1	1	1	1	W2_enantiopure AU	contains following chiral atom(s)C	NA	NA	5.181	9.6048	11.9887	67.824	85.664	78.436	541.243	1.29011	C31 H20 N2	(anthracen-9-yl){(anthracen-9-yl)methylideneamino}acetonitrile	293 K	None	None	yellow	None	None	None	None	E.A.Younes, N.Aljaar, M.F.Abdollahi, M.Shtaiwi, M.J.Issa, Yuming Zhao
HEZPIO	CHIRAL	Enantiopure	NO	NO	P1	1	TRUE	FALSE	3.27	1	1	4	C	4	4	2	2	0	(1, SSRR)	1	1	chiral	C1	1	1	1	W1_enantiopure AU	contains following chiral atom(s)C	NA	NA	5.8464	7.1522	13.4511	97.322	100.704	94.614	545.022	1.57057	C24 H22 F5 N1 O4 S1	4-benzyl 2-methyl 5-(naphthalen-2-yl)-3-(pentafluorosulfanyl)pyrrolidine-2,4-dicarboxylate	180 K	None	None	colorless	None	None	None	None	Qun Zhao, Thi Minh Ha Vuong, Xing-Fen Bai, X.Pannecoucke, Li-Wen Xu, J.-P.Bouillon, P.Jubault
HEZSUE	CHIRAL	Enantiopure	NO	NO	P1	1	TRUE	FALSE	4.67	2	1	8	C	8	6	4	4	0	(2, SRSR)	1	2	chiral	C1	2	2	2	Wa-could be Diast	contains following chiral atom(s)C	NA	NA	5.4772	10.9071	15.8238	87.181	81.592	83.697	928.979	1.32424	C20 H18 O5 S1	methyl 2-hydroxy-2-methyl-4-(phenylethynyl)-5-(thiophene-2-carbonyl)oxolane-3-carboxylate	293 K	None	None	colorless	None	None	None	None	Hang Yan, Cui Zhang, Jiao-Jiao Han, Si-Si Du, Yuan-Zhao Hua, Min-Can Wang, Guang-Jian Mei, Shi-Kun Jia
HEZWIT	CHIRAL	Enantiopure + achiral molecule	NO	NO	P1	1	TRUE	FALSE	3.26	2	1	6	C	6	6	4	2	0	(2, RRS)	1	2	chiral	C1	3	2	2	Wa-could be Diast	contains following chiral atom(s)C	NA	NA	6.6557	10.1584	10.397	65.158	83.596	85.909	633.696	1.59454	C12 H13 N3 O6,0.5(H2 O1)	5-(oxazol-2-yl)-2-deoxyuridine hemihydrate	at 100 K	None	None	colorless	None	None	None	None	N.J.Greco, Y.Tor
HIBGIL	ACHIRAL	+ achiral molecule	NO	NO	P1	1	TRUE	FALSE	3.58	0	0	0	No Chiral atom	0	0	0	0	0						2	2	2	NA	contains following chiral atom(s)No Chiral atom	NA	NA	8.4954	8.679	10.7105	100.366	100.314	90.093	763.793	1.24947	C13 H22 N1 O2 P1 S1	O,O-diethyl N-(2,4,6-trimethylphenyl)phosphoramidothioate	100.2 K	None	None	light yellow	None	None	None	None	E.Torabi Farkhani, M.Pourayoubi, M.Izadyar, P.V.Andreev, E.S.Shchegravina
HIBJAH	CHIRAL	Enantiopure	NO	NO	P1	1	TRUE	FALSE	4.24	1	1	1	C	1	1	1	0	0	(1, R)	1	1	chiral	C1	1	1	1	W2_enantiopure AU	contains following chiral atom(s)C	NA	NA	7.6178	9.532	10.344	83.24	70.42	72.99	676.555	1.29041	C26 H31 N5 O1 S3	2-({5-t-butyl-2-(5-t-butyl-1,3,4-thiadiazol-2-yl)imino-1,3,4-thiadiazol-3(2H)-yl}(4-methylphenyl)sulfanylmethyl)phenol	183 K	None	None	colorless	None	None	None	None	Anders, Ernst, M.Walther, Gorls, Helmar
HIDHUY	CHIRAL	Enantiopure	NO	NO	P1	1	TRUE	FALSE	3.54	1	1	3	C	3	3	1	2	0	(1, SRS)	1	1	chiral	C1	1	1	1	W1_enantiopure AU	contains following chiral atom(s)C	NA	NA	7.195	7.418	7.491	106.25	113.73	106.07	315.011	1.36119	C11 H14 O7	Methyl 3,4-di-O-acetyl-1,5-anhydro-2-deoxy-D-arabino-hex-1-enitol-pyranuronate	at 295 K	None	84-87deg.C	white	None	None	None	None	B.Liberek, D.Tuwalska, A.Konitz, A.Sikorski
HIDJUA	ACHIRAL	+ achiral molecule	NO	NO	P1	1	TRUE	FALSE	2.75	0	0	0	No Chiral atom	0	0	0	0	0						2	2	2	NA	contains following chiral atom(s)No Chiral atom	NA	NA	5.838	9.441	11.595	77.15	87.89	86.22	621.555	1.27331	C11 H14 N2 O2 S1	N-Ethoxycarbonyl-N-m-tolylthiourea	at 293 K	None	375-376 K	colorless	None	None	dimethylformamide/ethanol/water	None	Qi Lin, Tai-Bao Wei, You-Ming Zhang
HIDMEQ	CHIRAL	Enantiopure	NO	NO	P1	1	TRUE	FALSE	3.52	4	1	8	C	8	8	0	8	0	(4, SS)	1	4	chiral	C1	4	4	4	Wa-could be Diast	contains following chiral atom(s)C	NA	NA	8.5633	8.5633	10.9417	97.864	97.864	113.086	715.01	1.19063	C7 H12 O2	3-ethylcyclopent-3-ene-1,2-diol	293 K	None	None	None	None	None	None	None	Hong-Lei Li, Xiao-Ming Li, Zhen Ying, Yan-He Li, Bin-Gui Wang
HIDNER	CHIRAL	Enantiopure	NO	NO	P1	1	TRUE	FALSE	4.3	2	1	6	C	6	4	4	2	0	(2, SRR)	1	2	chiral	C1	2	2	2	Wa-could be Diast	contains following chiral atom(s)C	NA	NA	5.9034	6.6719	18.3783	85.564	83.297	72.986	686.74	1.2688	C12 H22 O4 S1	7-hydroxy-9-isopropyl-1-oxa-4Î»6-thiaspiro5.5undecane-4,4-dione	150 K	None	None	colorless	None	None	None	None	D.P.Gerasimova, I.R.Gilfanov, R.S.Pavelyev, L.E.Nikitina, O.A.Lodochnikova
HIFPOB	CHIRAL	Enantiopure + achiral molecule	NO	NO	P1	1	TRUE	FALSE	4.63	1	1	2	C	2	2	0	2	0	(1, SS)	1	1	chiral	C1	2	1	1	W1_enantiopure AU	contains following chiral atom(s)C	NA	NA	5.222	8.389	4.759	93.04	102.59	92.57	202.839	1.44221	C6 H10 N2 O3,H2 O1	cis-6-Hydroxymethyl-3-methyl-2,5-piperazinedione monohydrate	None	None	None	colorless	None	None	None	None	D.C.Swenson, S.M.Habermann, K.P.Murphy
HIFTAV	CHIRAL	Enantiopure	NO	NO	P1	1	TRUE	FALSE	3.53	2	1	2	C	2	2	0	2	0	(2, S)	1	2	chiral	C1	2	2	2	Wa-could be Diast	contains following chiral atom(s)C	NA	NA	6.2862	9.1953	9.8592	84.4015	82.4974	84.6302	560.431	1.21631	C12 H15 N1 O2	4-benzyl-5,5-dimethyl-1,3-oxazolidin-2-one	173 K	None	None	colorless	None	None	Re-crystallisation from solvent: dichloromethane/n-pentane	None	Jiwoo Jeong, Hoimin Jung, Dongwook Kim, Sukbok Chang
HIGBEE	CHIRAL	Enantiopure	NO	NO	P1	1	TRUE	FALSE	4.54	1	1	2	C	2	2	1	1	0	(1, RS)	1	1	chiral	C1	1	1	1	W1_enantiopure AU	contains following chiral atom(s)C	NA	NA	5.1086	8.251	13.94	105.15	94.95	104.27	542.484	1.2626	C22 H28 N4 O4	(S-(R*,S*))-((7-Azido-1-oxoheptyl)amino) (1-(2-naphthalenyl)ethoxy)acetic acid methyl ester	None	None	52deg.C	white	None	None	diethyl ether - petroleum ether	None	P.Durand, P.Richard, P.Renaut
HIGHAH	ACHIRAL	+ achiral molecule	NO	NO	P1	1	TRUE	FALSE	3.89	0	0	0	No Chiral atom	0	0	0	0	0						2	2	2	NA	contains following chiral atom(s)No Chiral atom	NA	NA	8.7116	8.9282	10.3514	81.577	71.429	66.61	700.295	1.3009	C19 H14 O2	9-Phenyl-9H-xanthen-9-ol	at 273 K	None	None	colorless	None	None	ethyl acetate/hexane	None	V.Kavala, S.Murru, B.K.Patel, G.Das
HILQOI	CHIRAL	Enantiopure	NO	NO	P1	1	TRUE	FALSE	4.3	4	1	4	C	4	4	0	4	0	(4, S)	1	4	chiral	C1	4	4	4	Wa-could be Diast	contains following chiral atom(s)C	NA	NA	10.8011	15.0951	15.9	83.118	73.209	82.776	2452.63	1.15237	C25 H31 N1 O5	4-Benzyloxycarbonyl-7,9-di-t-butyl-3-methyl-4-aza-1-oxaspiro(4,5)decan-6,9-dien-2,8-dione	None	None	97-98deg.C	colorless	None	None	hexane	None	G.Reischl, M.El-Mobayed, R.Beisswenger, K.Regier, C.Maichle-Mossmer, A.Rieker
HIMYOV	ACHIRAL	+ achiral molecule	NO	NO	P1	1	TRUE	FALSE	2.7	0	0	0	No Chiral atom	0	0	0	0	0						1	1	1	NA	contains following chiral atom(s)No Chiral atom	NA	NA	4.8813	6.7806	10.3135	98.101	94.174	97.612	333.515	1.51209	C14 H10 Cl1 N3 O3	4-chloro-N-(1E)-(2-nitrophenyl)methylidenebenzohydrazide	160 K	None	None	colorless	None	None	None	None	L.H.Al-Wahaibi, O.Blacque, E.R.T.Tiekink, A.A.El-Emam
HINKUN	CHIRAL	Enantiopure	NO	NO	P1	1	TRUE	FALSE	4.12	6	1	6	C	6	6	0	6	0	(6, S)	1	6	chiral	C1	6	6	6	Wa-could be Diast	contains following chiral atom(s)C	NA	NA	7.3254	7.3405	34.143	83.832	86.931	60.225	1584.34	1.34741	C13 H14 N2 O1	2-phenyl-2,6,7,8-tetrahydropyrrolo1,2-apyrimidin-4(3H)-one	173 K	None	None	colorless	None	None	None	None	Anthony Linden, P.Kuehne, M.Hesse
HIPBAN	CHIRAL	Enantiopure	NO	NO	P1	1	TRUE	FALSE	3.36	2	1	2	C	2	2	2	0	0	(2, R)	1	2	chiral	C1	2	2	2	Wa-could be Diast	contains following chiral atom(s)C	NA	NA	9.0483	10.5533	11.0036	70.065	86.368	66.571	903.148	1.23326	C21 H22 N1 O1 P1	P,P-diphenyl-N-(1-phenylpropyl)phosphinic amide	95 K	None	None	colorless	None	None	None	None	F.Eslami, M.Pourayoubi, F.Sabbaghi, E.Skorepova, M.Dusek, S.Baniyaghoob
HIPKAS	CHIRAL	Enantiopure + achiral molecule	NO	NO	P1	1	TRUE	FALSE	3.4	3	1	12	C	12	12	9	3	0	(3, SRRR)	1	3	chiral	C1	5	3	3	Wa-could be Diast	contains following chiral atom(s)C	NA	NA	4.7845	8.7663	16.3329	101.134	96.113	95.87	663.006	1.45902	C6 H14 O6,0.67(H2 O1)	D-Glucitol hydrate	at 100 K	None	None	colorless	None	None	None	None	A.Schouten, J.A.Kanters, J.Kroon, S.Comini, P.Looten, M.Mathlouthi
HIRHIC	CHIRAL	Enantiopure	NO	NO	P1	1	TRUE	FALSE	3.82	2	1	8	C	8	2	2	6	0	(2, RSSS)	1	2	chiral	C1	2	2	2	Wa-could be Diast	contains following chiral atom(s)C	NA	NA	6.9631	10.2646	11.2511	74.472	81.297	70.974	730.663	1.15616	C15 H26 O3	1-3,5-dihydroxy-7a-methyl-5-(propan-2-yl)octahydro-3aH-inden-3a-ylethan-1-one	296 K	None	None	None	None	None	None	None	Jiaozhen Zhang, Yongjie Wang, Rongxiu Zhu, Yi Li, Yuelan Li, Yanan Qiao, Jinchuan Zhou, Hongxiang Lou
HIRKIG	CHIRAL	Enantiopure	NO	NO	P1	1	TRUE	FALSE	5	2	1	2	C	2	2	0	2	0	(2, S)	1	2	chiral	C1	2	2	2	Wa-could be Diast	contains following chiral atom(s)C	NA	NA	9.7924	9.9313	10.368	92.455	90.71	117.455	893.331	1.35073	C19 H16 F3 N1 O3	4-acetamido-1,1-difluoro-4-phenylbut-2-en-1-yl 3-fluorobenzoate	293 K	None	None	colorless	None	None	None	None	Xingwei Li, Heng Song, Songjie Yu, Ruijie Mi, Xiao-Xi Li
HISHIE	CHIRAL	Enantiopure	NO	NO	P1	1	TRUE	FALSE	2.74	2	1	4	C	4	4	0	4	0	(2, SS)	1	2	chiral	C1	2	2	2	Wa-could be Diast	contains following chiral atom(s)C	NA	NA	5.5116	12.2119	12.4445	65.715	83.388	87.906	758.352	1.66568	C12 H13 F5 O4 S2	(4S)-5,5-difluoro-3-(methanesulfonyl)-1-((2S)-3,3,3-trifluoro-2-methylpropoxy)-5,6-dihydro-4H-cyclopentacthiophene-4-ol	100.0 K	None	None	colorless	None	None	Re-crystallisation from solvent: THF	None	H.-P.Buchstaller, A.Sala-Hojman, M.Leiendecker, J.Albers, Uwe Anlauf, N.Berges, Liming Dong, T.Fuch, M.Germann, Tim Knehans, M.Krier, M.Lecomte, D.Muller, S.R.Muller, B.Leuthner, R.Lindemann, D.Musil, M.Nowak, V.Reither, C.Rettig, C.E.M.Schindler, U.Pakulska, D.Spuck, A.Wegener, A.Zarebski
HISHOK	CHIRAL	Enantiopure	NO	NO	P1	1	TRUE	FALSE	4.15	2	1	4	C	4	4	2	2	0	(2, RS)	1	2	chiral	C1	2	2	2	Wa-could be Diast	contains following chiral atom(s)C	NA	NA	5.5104	12.1668	12.4446	65.612	83.226	87.884	754.519	1.67415	C12 H13 F5 O4 S2	(4S)-5,5-difluoro-3-(methanesulfonyl)-1-((2R)-3,3,3-trifluoro-2-methylpropoxy)-5,6-dihydro-4H-cyclopentacthiophene-4-ol	100.0 K	None	None	colorless	None	None	Re-crystallisation from solvent: THF	None	H.-P.Buchstaller, A.Sala-Hojman, M.Leiendecker, J.Albers, Uwe Anlauf, N.Berges, Liming Dong, T.Fuch, M.Germann, Tim Knehans, M.Krier, M.Lecomte, D.Muller, S.R.Muller, B.Leuthner, R.Lindemann, D.Musil, M.Nowak, V.Reither, C.Rettig, C.E.M.Schindler, U.Pakulska, D.Spuck, A.Wegener, A.Zarebski
HISPAB	ACHIRAL	+ achiral molecule	NO	NO	P1	1	TRUE	FALSE	3.6	0	0	0	No Chiral atom	0	0	0	0	0						4	4	4	NA	contains following chiral atom(s)No Chiral atom	NA	NA	9.121	9.651	18.764	100.96	101.06	100.08	1552.68	1.49132	C12 H12 S6	(E,Z,Z,Z,Z,Z)-1,4,7,10,13,16-Hexathiacyclopentadeca-2,5,8,11,14,17-hexaene	at 293 K	None	405-406 K	colorless	None	None	acetone	None	T.Tsuchiya, Y.Okada, T.Shimizu, K.Hirabayashi, N.Kamigata
HITNED	ACHIRAL	+ achiral molecule	NO	NO	P1	1	TRUE	FALSE	4.98	0	0	0	No Chiral atom	0	0	0	0	0						2	2	2	NA	contains following chiral atom(s)No Chiral atom	NA	NA	6.591	8.541	14.062	98.24	95.42	97.08	772.374	1.30844	C14 H16 N4 O4	2,2-Dimethylhexa-3,4-dienal 2,4-dinitrophenylhydrazone	None	None	114-115.5 deg.C	orange	None	None	methanol	None	R.Marek, M.Potacek, J.Marek, A.De Groot, R.Dommisse
HIVLAA	CHIRAL	Enantiopure	NO	NO	P1	1	TRUE	FALSE	4.22	2	1	2	C	2	2	0	2	0	(2, S)	1	2	chiral	C1	2	2	2	Wa-could be Diast	contains following chiral atom(s)C	NA	NA	5.1071	7.4594	12.221	82.23	89.01	82.52	457.37	1.59165	C6 H13 N5 O4	L-Nitroarginine	at 293 K	None	None	colorless	triclinic beta polymorph	None	None	None	R.A.Apreyan, H.A.Karapetyan, A.M.Petrosyan
HIVLAA01	CHIRAL	Enantiopure	NO	NO	P1	1	TRUE	FALSE	3.08	2	1	2	C	2	2	0	2	0	(2, S)	1	2	chiral	C1	2	2	2	Wa-could be Diast	contains following chiral atom(s)C	NA	NA	5.0847	7.394	12.1779	81.4901	88.4779	83.0205	449.43	1.61977	C6 H13 N5 O4	L-Nitroarginine	at 100 K	None	None	colorless	None	None	None	None	A.O.Borissova, M.Yu.Antipin, H.A.Karapetyan, A.M.Petrosyan, K.A.Lyssenko
HIWREM	CHIRAL	Enantiopure	NO	NO	P1	1	TRUE	FALSE	4.51	4	1	8	C	8	4	0	8	0	(4, SS)	1	4	chiral	C1	4	4	4	Wa-could be Diast	contains following chiral atom(s)C	NA	NA	7.5282	13.8718	14.4637	95.79	97.794	92.714	1486	1.43166	C16 H16 O7	Methyl 4,8-dihydroxy-1-methoxy-9-oxo-2,3,4,9-tetrahydro-4aH-xanthene-4a-carboxylate	at 100 K	None	None	colorless	None	None	None	None	Tian Qin, J.A.Porco Junior
HIWVIV	CHIRAL	Enantiopure	NO	NO	P1	1	TRUE	FALSE	3.69	1	1	4	C	4	3	1	3	0	(1, SSSR)	1	1	chiral	C1	1	1	1	W1_enantiopure AU	contains following chiral atom(s)C	NA	NA	6.424	8.148	11.8965	108.357	103.555	93.668	568.103	1.35223	C26 H26 N2 O2 S2	7-methyl-3-(4-methylphenyl)sulfonyl-1-(thiophen-3-yl)-2,3,4,4a,6a,7-hexahydro-1H-pyrido4,3:2,3cyclopenta1,2-bindole	170.0 K	None	None	colorless	None	None	None	None	Yan-Yan Zhang, Yin Wei, Min Shi
HIXWUJ02	DIASTEREOMER		NO	NO	P1	1	TRUE	FALSE	3.97	2	1	8	C	8	6	4	4	0	(1, SRRS), (1, SRSR)	2	2	diast	C1	2	2	2	DIAST-1, contains DIAST	contains following chiral atom(s)C	NA	NA	9.1632	10.7284	13.1158	96.548	104.019	96.064	1230.87	1.28051	C30 H34 O5	6-benzoyl-7,9-dihydroxy-2,2,4a-trimethyl-13-methylidene-1,2,2a,3,4,4a,10,10a,11,12,13,13a-dodecahydrobenzobcyclobuta5,6cyclonona1,2-epyran-8-carbaldehyde	113.7 K	None	None	None	None	None	None	None	Chen Xinyi, Huang Jiwu, Li Chuangjun, Ma Jie, Zang Yingda, Zhang Dongming
HIYDEZ	CHIRAL	Enantiopure	NO	NO	P1	1	TRUE	FALSE	3.47	2	1	2	C	2	2	2	0	0	(2, R)	1	2	chiral	C1	2	2	2	Wa-could be Diast	contains following chiral atom(s)C	NA	NA	9.8536	9.9101	10.9855	101.697	98.47	107.063	979.416	1.30041	C22 H25 N1 O3 S1	(R)-(+)-1-(2-(4-Ethylidene-1-(toluene-4-sulfonyl)pyrrolidin-3-ylmethyl)phenyl)ethanone	at 123 K	None	None	colorless	None	None	None	None	K.Tanaka, Y.Otake, H.Sagae, K.Noguchi, M.Hirano
HIYVAO	ACHIRAL	+ achiral molecule	NO	NO	P1	1	TRUE	FALSE	2.79	0	0	0	No Chiral atom	0	0	0	0	0						2	1	1	NA	contains following chiral atom(s)No Chiral atom	NA	NA	5.542	9.0086	9.0345	86.407	76.627	86.428	437.429	1.29203	C19 H19 N2 O1 P1,H2 O1	1-(6-((diphenylphosphoryl)methyl)pyridin-2-yl)methanamine monohydrate	100 K	None	None	colorless	None	None	MeOH, t-BuOH, CH2Cl2, Et2O 1:1:1:1	None	S.Ouizem, S.L.Pailloux, A.D.Ray, E.N.Duesler, D.A.Dickie, R.T.Paine, B.P.Hay
HMOZST01	CHIRAL	Enantiopure + achiral molecule	NO	NO	P1	1	TRUE	FALSE	2.5	1	1	4	C	4	1	1	3	0	(1, SSRS)	1	1	chiral	C1	2	1	1	W1_enantiopure AU	contains following chiral atom(s)C	NA	NA	6.077	10.039	11.403	114.62	97.05	102.22	600.424	1.62243	C19 H19 Br1 N2 O7,C1 H1 Cl3	3-Hydroxy-3-methyl-12-methylene-4-(p-bromobenzoyloxy)-trans-1,9-dioxa-6,13-diazadispiro(4.2.4.2)tetradeca-7,14-dione chloroform solvate	at -50 deg.C	None	215-218deg.C	colorless	None	None	None	None	A.Santillan Junior, Xiangdong Zhang, J.Hardesty, W.R.Widger, H.Kohn
HOCREZ	CHIRAL	Enantiopure	NO	NO	P1	1	TRUE	FALSE	3.28	2	1	2	C	2	0	0	2	0	(2, S)	1	2	chiral	C1	2	2	2	Wa-could be Diast	contains following chiral atom(s)C	NA	NA	6.0344	10.0462	22.3621	81.685	85.78	83.966	1331.62	1.35095	C30 H43 N3 O6	benzyl 1,4,21,26-tetraoxa-8,13,17-triazapentaspiro4.1.1.2.1.514.312.29.37.25nonacosane-17-carboxylate	100 K	None	None	colorless	None	None	None	None	F.Saito, N.Trapp, J.W.Bode
HOCYEG	CHIRAL	Enantiopure	NO	NO	P1	1	TRUE	FALSE	3.7	5	1	20	C	20	20	20	0	0	(5, RRRR)	1	5	chiral	C1	5	5	5	Wa-could be Diast	contains following chiral atom(s)C	NA	NA	12.7	12.756	43.4	81.58	88.39	60.36	6036.96	1.184	C56 H56 Li2 N4 P2	bis(Î¼-P,P-diphenyl-N,N-bis((R)-1-phenylethyl)phosphinimidic amide)-di-lithium	150 K	None	None	colorless	None	None	None	None	T.J.Feuerstein, B.Goswami, P.Rauthe, R.Koppe, S.Lebedkin, M.M.Kappes, P.W.Roesky
HOFVED	ACHIRAL	+ achiral molecule	NO	NO	P1	1	TRUE	FALSE	3	0	0	0	No Chiral atom	0	0	0	0	0						3	3	3	NA	contains following chiral atom(s)No Chiral atom	NA	NA	10.249	15.559	8.759	100.46	105.07	72.55	1278.48	3.04651	C12 H6 Se8	Bitetraselenafulvalene	None	None	None	orange	None	None	None	None	M.Iyoda, K.Hara, C.R.Venkateswara Rao, Y.Kuwatani, K.Takimiya, A.Morikami, Y.Aso, T.Otsubo
HOGBOW	ACHIRAL	+ achiral molecule	NO	NO	P1	1	TRUE	FALSE	2.91	0	0	0	No Chiral atom	0	0	0	0	0						1	1	1	NA	contains following chiral atom(s)No Chiral atom	NA	NA	5.205	6.87	8.803	106.19	91.612	103.098	293.026	1.92753	C12 H10 N2 Se2	2,5-Diethyl-7,8-diselenabicyclo4.2.0octa-1,3,5-triene-3,4-dicarbonitrile	at 100 K	None	None	red	None	None	None	None	T.Kimura, T.Nakahodo, H.Fujihara, E.Suzuki
HOGFAM	CHIRAL	Enantiopure	NO	NO	P1	1	TRUE	FALSE	2.6	1	1	3	C	3	3	0	3	0	(1, SSS)	1	1	chiral	C1	1	1	1	W1_enantiopure AU	contains following chiral atom(s)C	NA	NA	7.9687	9.4665	9.6211	62.398	77.124	81.985	626.449	1.22879	C30 H29 N3 O2	ethyl 4,6-bis(1H-indol-3-yl)-1-phenylpiperidine-2-carboxylate	at 120 K	None	None	colorless	None	None	None	None	Sabilla Zhong, M.Nieger, A.Bihlmeier, Min Shi, S.Brase
HOLOTM	CHIRAL	Enantiopure	NO	NO	P1	1	TRUE	FALSE	4.8	1	1	8	C	8	4	1	7	0	(1, SSSRSSSS)	1	1	chiral	C1	1	1	1	W1_enantiopure AU	contains following chiral atom(s)C	NA	NA	17.367	6.277	7.034	112.78	89.79	92.25	706.383	1.17704	C31 H48 O5	Holotoxinogenin 25-methyl ether	None	None	236-8deg.C	None	None	None	None	X-COORD OF C4 GIVEN AS .9655 IN TAB 3 SHOULD BE .09655	W.L.Tan, C.Djerassi, J.Fayos, J.Clardy
HOLYIQ	CHIRAL	Enantiopure	NO	NO	P1	1	TRUE	FALSE	3.35	1	1	2	C	2	2	1	1	0	(1, RS)	1	1	chiral	C1	1	1	1	W1_enantiopure AU	contains following chiral atom(s)C	NA	NA	8.767	10.193	10.307	85.26	65.43	84.44	832.803	1.23179	C43 H39 N1 O3	(4R,5S)-5-((4-Anilinophenyl-diphenyl)methyl)-2,2-dimethyl-1,3-dioxazolane-4-diphenylmethanol	None	None	473-475 K	colorless	None	None	None	None	D.Seebach, A.Pichota, A.K.Beck, A.B.Pinkerton, T.Litz, J.Karjalainen, V.Gramlich
HOMFUM	CHIRAL	Enantiopure	NO	NO	P1	1	TRUE	FALSE	4.9	2	1	4	C	4	2	2	2	0	(2, SR)	1	2	chiral	C1	2	2	2	Wa-could be Diast	contains following chiral atom(s)C	NA	NA	9.3592	9.858	13.1796	86.612	87.077	84.894	1207.77	1.16737	C28 H28 N2 O2	t-Butyl 1,4-diphenyl-2,3,4,9-tetrahydro-1H-Î²-carboline-4-carboxylate	293 K	None	481-482 K	None	None	None	None	None	Jian-Quan Weng, Qiao-Man Deng, Liang Wu, Kai Xu, Hao Wu, Ren-Rong Liu, Jian-Rong Gao, Yi-Xia Jia
HOMPOO	CHIRAL	Enantiopure + achiral molecule	NO	NO	P1	1	TRUE	FALSE	3.92	2	1	6	C	6	4	0	6	0	(2, SSS)	1	2	chiral	C1	4	2	2	Wa-could be Diast	contains following chiral atom(s)C	NA	NA	10.165	10.536	12.664	86.27	78.62	87.52	1326.17	1.15101	C26 H39 N3 O3,H2 O1	N-Isopropyl N-t-butylcarbonylproline-(2S,3S)-1-amino-2-phenylcyclohexanecarboxamide monohydrate	None	None	None	None	None	None	None	y(C23B) is 0.1417,4 not 0.1517,4; x(HC18A) is 0.4109, not 0.5109	A.I.Jimenez, C.Cativiela, M.Paris, J.M.Peregrina, A.Avenoza, A.Aubry, M.Marraud
HOMSIN	CHIRAL	Enantiopure	NO	NO	P1	1	TRUE	FALSE	3.64	2	1	2	C	2	2	0	2	0	(2, S)	1	2	chiral	C1	2	2	2	Wa-could be Diast	contains following chiral atom(s)C	NA	NA	5.2328	5.3872	14.9081	98.493	92.137	108.936	391.524	1.40958	C8 H10 N2 O2	2-ammonio-3-(pyridin-2-yl)propanoate	at 292 K	None	None	None	None	None	None	None	M.Wojtas, A.Gagor, A.Kholkin
HORHII	CHIRAL	Enantiopure	NO	NO	P1	1	TRUE	FALSE	4.45	1	1	8	C	8	5	2	6	0	(1, RSSSSRSS)	1	1	chiral	C1	1	1	1	W1_enantiopure AU	contains following chiral atom(s)C	NA	NA	6.2053	8.5119	9.3471	84.014	76.948	71.401	455.553	1.31385	C21 H28 O5	10,12b-dihydroxy-3,7b-dimethyl-5-oxo-1,2,2a,3,6,7,7a,7b,8,9,10,11,12a,12b-tetradecahydro-5H-benzo6,7-as-indaceno3,3a-cfuran-12-carbaldehyde	293 K	None	None	colorless	None	None	methanol	None	Fang-Yu Yuan, Xiao-Ling Wang, Tian Wang, Tao Shen, Dongmei Ren, Hongxiang Lou, Xiao-Ning Wang
HORJAC	CHIRAL	Enantiopure	NO	NO	P1	1	TRUE	FALSE	3.51	2	1	4	C	4	2	2	2	0	(2, SR)	1	2	chiral	C1	2	2	2	Wa-could be Diast	contains following chiral atom(s)C	NA	NA	7.5258	8.41	15.2735	84.233	80.971	67.427	880.714	1.37782	C20 H19 N3 O4	1-benzyl-10-hydroxy-1-methoxy-4-methyl-2H-pyrazino2,1-bquinazoline-3,6(1H,4H)-dione	100 K	None	None	whiteish colorless	None	None	methanol	None	Xiao Liang, Xuelian Zhang, Xinhua Lu, Zhihui Zheng, Xuan Ma, Shuhua Qi
HOTKIM	CHIRAL	Enantiopure	NO	NO	P1	1	TRUE	FALSE	4.56	1	1	3	C	3	3	2	1	0	(1, RRS)	1	1	chiral	C1	1	1	1	W1_enantiopure AU	contains following chiral atom(s)C	NA	NA	5.2395	8.3284	9.9746	82.687	84.711	83.146	427.32	1.38658	C16 H17 Cl1 O5 S1	(3-acetoxy-6-((3-chlorophenyl)sulfanyl)-3,6-dihydro-2H-pyran-2-yl)methyl acetate	293 K	None	None	colorless	None	None	None	None	D.Stevanovic, A.Pejovic, I.Damljanovic, A.Minic, G.A.Bogdanovic, M.Vukicevic, N.S.Radulovic, R.D.Vukicevic
HOTMOT	CHIRAL	Enantiopure + achiral molecule	NO	NO	P1	1	TRUE	FALSE	4.86	2	1	8	C	8	8	4	4	0	(2, SRSR)	1	2	chiral	C1	9	2	2	Wa-could be Diast	contains following chiral atom(s)C	NA	NA	6.5949	11.9	12.9774	87.696	85.816	82.688	1006.99	1.47565	C15 H17 F1 N4 O5 S1,3.5(H2 O1)	(1R,2S,3R,4S)-1-(6-(4-Fluorophenyl)-7H-1,2,4triazolo3,4-b1,3,4thiadiazin-3-yl)pentane-1,2,3,4,5-pentaol hydrate	at 298 K	None	None	colorless	None	None	ethanol	None	Yu-Zhen Liu, Qi-Chun Ding, Jing Zhang, Jiang-Yu Jin, Xin-Xiang Lei, Li-Xue Zhang
HOVDAY	RACEMATE	Contains also at least an other enantiomer in enantiopure proportion	KRYPTORACEMIC	NO	P1	1	TRUE	FALSE	4.59	3	2	4	C	4	4	1	3	0	(1, S), (1, R), (1, SS)	2, 1	2, 1	racemic, chiral	C1	3	1	1	W1_enantiopure AU	contains following chiral atom(s)C	NA	NA	8.206	12.1472	14.457	105.296	105.248	92.646	1330.71	1.32912	2(C20 H21 N1 O4),C20 H18 O8	bis((-)-5,8,13,13a-Tetrahydro-9,10-dimethoxy-2,3-methylenedioxy-6H-dibenzo(a,g)quinolizine) (+)-2,3-bis(((4-methylphenyl)carbonyl)oxy)butanedioic acid	at 273 K	None	431-432 K	colorless	None	None	methanol	None	Jing-Ming Gao, Wei-Tao Liu, Man-Lin Li, Han-Wei Liu, Xing-Chang Zhang, Zong-Xiao Li
HOVFEG	ACHIRAL	+ achiral molecule	NO	NO	P1	1	TRUE	FALSE	3.82	0	0	0	No Chiral atom	0	0	0	0	0						2	2	2	NA	contains following chiral atom(s)No Chiral atom	NA	NA	7.1581	9.9418	12.4859	93.092	98.086	106.655	838.64	1.64068	C22 H10 F4 O4	5,5,8,8-tetrafluoro-3,3-dihydroxy1,1-binaphthalene-2,2-dicarbaldehyde	123 K	None	None	colorless	None	None	None	None	R.M.Witzig, V.C.Faseke, D.Haussinger, C.Sparr
HOVFON	CHIRAL	Enantiopure	NO	NO	P1	1	TRUE	FALSE	3.2	1	1	2	C	2	2	1	1	0	(1, RS)	1	1	chiral	C1	1	1	1	W1_enantiopure AU	contains following chiral atom(s)C	NA	NA	7.1179	7.8192	8.7364	83.763	76.012	82.907	466.636	1.2932	C21 H21 N3 O3	2-Methoxycarbonyl-5-((S)-1-phenylethyl)-3,3a-dihydro-(3aR)-pyrazolo(1,5-a)(1,4)benzodiazepine-4(6H)-one	None	None	411 K	yellow	None	None	pentane/dichloromethane	None	G.Broggini, G.Casalone, L.Garanti, G.Molteni, T.Pilati, G.Zecchi
HOWPUG	CHIRAL	Enantiopure + achiral molecule	NO	NO	P1	1	TRUE	FALSE	3.42	2	1	2	C	2	2	0	2	0	(2, S)	1	2	chiral	C1	4	2	2	Wa-could be Diast	contains following chiral atom(s)C	NA	NA	6.8994	10.0527	13.1374	98.852	94.25	105.957	859.111	1.58976	C16 H15 Br1 N2 O4,C1 H4 O1	1-(2-(4-bromophenyl)-2-oxoethyl)-7,9-diazaspiro4.5decane-6,8,10-trione methanol solvate	at 150 K	None	None	colorless	None	None	None	None	Yinan Zhang, Xixi Song, Xiaobei Chen, Aiguo Song, Shilei Zhang, Wei Wang
HOYHAH	CHIRAL	Enantiopure	NO	NO	P1	1	TRUE	FALSE	3.27	2	1	6	C	6	6	4	2	0	(2, RSR)	1	2	chiral	C1	2	2	2	Wa-could be Diast	contains following chiral atom(s)C	NA	NA	6.7833	8.3898	10.4806	73.5018	82.1953	82.8744	564.303	1.46093	C12 H12 N2 O4	3-methoxy-6-(3-nitrophenyl)-3-azabicyclo3.1.0hexan-2-one	120 K	None	None	colorless	None	None	None	None	H.S.A.Mandour, Y.Nakagawa, M.Tone, H.Inoue, N.Otog, I.Fujisawa, S.Chanthamath, S.Iwasa
HOYLAL	CHIRAL	Enantiopure	NO	NO	P1	1	TRUE	FALSE	3.93	1	1	5	C	5	5	4	1	0	(1, RRRSR)	1	1	chiral	C1	1	1	1	W1_enantiopure AU	contains following chiral atom(s)C	NA	NA	5.4195	9.7608	14.8083	73.333	86.546	89.501	749.036	1.32704	C29 H34 N4 O10	2-(acetyloxy)methyl-6-{1-(2,6,8-trimethylquinolin-4-yl)-1H-1,2,3-triazol-4-ylmethoxy}oxane-3,4,5-triyl triacetate	100 K	None	None	light colorless	None	None	None	None	Nguyen Dinh Thanh, Le The Duan, Doan Thi Hien, Luu Son Quy, Nguyen Hung Huy
HOYYEA	CHIRAL	Enantiopure	NO	NO	P1	1	TRUE	FALSE	4.2	1	1	2	C	2	2	0	2	0	(1, SS)	1	1	chiral	C1	1	1	1	W1_enantiopure AU	contains following chiral atom(s)C	NA	NA	7.4769	10.4729	11.633	75.606	85.901	76.389	857.465	1.14801	C40 H48 O4	(3S,3S)-3,3-Dihydroxy-7,7,8,8-tetradehydro-Î²,Î²-carotene-4,4-dione	at 100 K	None	None	red	None	None	None	None	G.Bartalucci, S.Fisher, J.R.Helliwell, M.Helliwell, S.Liaaen-Jensen, J.E.Warren, J.Wilkinson
HTENTX10	CHIRAL	Enantiopure	NO	NO	P1	1	TRUE	FALSE	4.5	1	1	3	C	3	3	1	2	0	(1, SSR)	1	1	chiral	C1	1	1	1	W1_enantiopure AU	contains following chiral atom(s)C	NA	NA	9.511	9.614	6.92	114.42	86.77	93.94	574.516	1.20386	C22 H32 N4 O4	Cyclo(L-leucyl-D-methylphenylalanyl-glycyl-L-methylalanyl)	None	None	None	None	None	None	None	None	P.N.Swepston, A.W.Cordes, L.F.Kuyper, W.L.Meyer
HUBREE	CHIRAL	Enantiopure	NO	NO	P1	1	TRUE	FALSE	3.24	2	1	10	C	10	2	6	4	0	(2, RSRSR)	1	2	chiral	C1	2	2	2	Wa-could be Diast	contains following chiral atom(s)C	NA	NA	10.9335	11.6132	14.4251	96.45	98.237	90.128	1800.92	1.11914	C39 H58 O5	6-methyl-1,3,7-tris(3-methylbut-2-en-1-yl)-6-(4-methylpent-3-en-1-yl)-5-(2-methylpropanoyl)-3-(3-oxobutyl)bicyclo3.3.1nonane-2,4,9-trione	100 K	None	None	colorless	None	None	None	None	Na-Na Jiang, Shu-Zong Du, Yan-Song Ye, Hui Yan, Xing-Wei Yang, Jian Yang, Yin Nian, Gang Xu
HUCFOD	ACHIRAL	+ achiral molecule	NO	NO	P1	1	TRUE	FALSE	4.23	0	0	0	No Chiral atom	0	0	0	0	0						2	2	2	NA	contains following chiral atom(s)No Chiral atom	NA	NA	5.2621	7.3496	18.4982	82.118	86.611	72.448	675.535	1.18621	C15 H15 N1 O2	2-(3-cyanopropyl)-4-phenylpenta-2,3-dienoic acid	170.0 K	None	None	colorless	None	None	None	None	Wei-Feng Zheng, Wanli Zhang, Chaofan Huang, Penglin Wu, Hui Qian, Lei Wang, Yin-Long Guo, Shengming Ma
HUFYIR01	CHIRAL	Enantiopure	NO	NO	P1	1	TRUE	FALSE	4.46	2	1	12	C	12	4	6	6	0	(2, RSRSRS)	1	2	chiral	C1	2	2	2	Wa-could be Diast	contains following chiral atom(s)C	NA	NA	6.44227	12.4785	12.9809	69.5412	87.6781	80.5551	964.294	1.19337	C22 H34 O3	ethyl 16-oxobeyeran-18-oate	100 K	None	395.2-395.8 K	light colorless	None	None	ethanol	None	Peng Chen, Dianwen Zhang, Meng Li, Qiong Wu, Y.P.Y.Lam, Yan Guo, Chen Chen, Nan Bai, S.Malhotra, Wei Li, P.B.OConnor, Hongzheng Fu
HUHDUK01	ACHIRAL	+ achiral molecule	NO	NO	P1	1	TRUE	FALSE	4.51	0	0	0	No Chiral atom	0	0	0	0	0						2	1	1	NA	contains following chiral atom(s)No Chiral atom	NA	NA	3.811	10.342	10.844	65.84	85.83	89.45	388.833	1.43637	C12 H10 N2,C7 H6 O4	2,4-Dihydroxybenzoic acid 4,4-ethene-1,2-diyldipyridine	298 K	None	None	None	P1 polymorph	None	None	None	S.Varughese, A.A.Hoser, K.N.Jarzembska, V.R.Pedireddi, K.Wozniak
HUHKEC	CHIRAL	Enantiopure	NO	NO	P1	1	TRUE	FALSE	4.51	2	1	14	C	14	6	10	4	0	(2, SRRRRSR)	1	2	chiral	C1	2	2	2	Wa-could be Diast	contains following chiral atom(s)C	NA	NA	6.108	7.159	20.206	97.983	91.8	111.632	810.083	1.28074	C17 H28 O5	5-(hydroxymethyl)-5,9,13-trimethyl-12,14,16-trioxatetracyclo11.2.1.01,10.04,9hexadecan-6-ol	296 K	None	None	colorless	None	None	None	None	Bian-Lin Wang, Hai-Tao Gao, W.-D.Z.Li
HUMWUI	CHIRAL	Enantiopure	NO	NO	P1	1	TRUE	FALSE	3.7	1	1	3	C	3	2	2	1	0	(1, SRR)	1	1	chiral	C1	1	1	1	W1_enantiopure AU	contains following chiral atom(s)C	NA	NA	6.4156	8.4837	9.793	65.997	83.926	69.026	454.164	1.23736	C22 H27 O1 P1	Diphenyl(1,3,3-trimethylbicyclo2.2.1hept-2-yl)phosphine oxide	at 150 K	None	None	colorless	None	None	None	None	J.Beckmann, A.Schutrumpf
HUMXAP	CHIRAL	Enantiopure	NO	NO	P1	1	TRUE	FALSE	3.72	1	1	3	C	3	2	1	2	0	(1, SRS)	1	1	chiral	C1	1	1	1	W1_enantiopure AU	contains following chiral atom(s)C	NA	NA	6.1868	8.6101	9.9431	107.691	101.7	106.169	460.122	1.22133	C22 H27 O1 P1	Diphenyl(1,3,3-trimethylbicyclo2.2.1hept-2-yl)phosphine oxide	at 150 K	None	None	colorless	None	None	None	None	J.Beckmann, A.Schutrumpf
HUNGEC	CHIRAL	Enantiopure	NO	NO	P1	1	TRUE	FALSE	4.7	2	1	4	C	4	4	0	4	0	(2, SS)	1	2	chiral	C1	2	2	2	Wa-could be Diast	contains following chiral atom(s)C	NA	NA	10.358	16.996	5.005	90.6	97.66	80.62	861.507	1.30833	C19 H21 N3 O3	(S,R)-N-(1-(Benzoylamino)ethyl)-2-methyl-N-phenylmalonamide	None	None	234-235 deg.C	None	None	None	ethanol	None	A.Carotti, A.Carrieri, S.Cellamare, F.P.Fanizzi, E.Gavuzzo, F.Mazza
HURTOF	CHIRAL	Enantiopure	NO	NO	P1	1	TRUE	FALSE	3.66	1	1	2	C	2	0	1	1	0	(1, SR)	1	1	chiral	C1	1	1	1	W1_enantiopure AU	contains following chiral atom(s)C	NA	NA	8.4125	9.7659	11.5692	108.577	95.876	110.228	820.896	1.35437	C35 H30 Br1 F1 N4 O4	t-butyl (1-benzyl-3-(3-(4-bromophenyl)-4-fluoro-5-oxo-1-phenyl-4,5-dihydro-1H-pyrazol-4-yl)-2-oxo-2,3-dihydro-1H-indol-3-yl)carbamate	296 K	None	None	white	None	None	None	None	Xiaoze Bao, Baomin Wang, Longchen Cui, Guodong Zhu, Yuli He, Jingping Qu, Yuming Song
HURYUQ	CHIRAL	Enantiopure	NO	NO	P1	1	TRUE	FALSE	3.86	1	1	3	C	3	2	2	1	0	(1, RSR)	1	1	chiral	C1	1	1	1	W1_enantiopure AU	contains following chiral atom(s)C	NA	NA	5.8748	6.6516	7.3831	67.621	84.526	66.767	244.635	1.31837	C11 H14 O3	8-methylenehexahydro-6H-cyclopentacfuro2,3-dpyran-2(3H)-one	293 K	None	None	colorless	None	None	None	None	Y.Mostinski, V.Valerio, D.Lankri, D.Tsvelikhovsky
HUSLUE	CHIRAL	Enantiopure	NO	NO	P1	1	TRUE	FALSE	3.9	2	1	4	C	4	4	4	0	0	(2, RR)	1	2	chiral	C1	2	2	2	Wa-could be Diast	contains following chiral atom(s)C	NA	NA	8.366	9.56	11.005	113.946	107.506	92.316	753.704	1.5694	C14 H14 Br1 N1 O5	methyl 5-(((4-bromobenzoyl)oxy)methyl)-3-methyl-4,5-dihydro-1,2-oxazole-4-carboxylate	173 K	None	None	colorless	None	None	None	None	Li Dong, Caiwei Geng, Peng Jiao
HUVGEL	CHIRAL	Enantiopure	NO	NO	P1	1	TRUE	FALSE	3.01	2	1	6	C	6	6	4	2	0	(2, RSR)	1	2	chiral	C1	2	2	2	Wa-could be Diast	contains following chiral atom(s)C	NA	NA	6.8757	10.367	12.993	84.705	82.939	87.812	914.862	1.26127	C15 H21 N5 O3 Si1	1-(4-Azido-5-(3-(trimethylsilyl)prop-2-yn-1-yl)tetrahydrofuran-2-yl)-5-methylpyrimidine-2,4(1H,3H)-dione	at 100 K	None	None	colorless	None	None	acetone/hexane	None	T.Fujino, N.Tsunaka, M.Guillot-Nieckowski, W.Nakanishi, T.Iwamoto, E.Nakamura, H.Isobe
HUVXIF	CHIRAL	Enantiopure	NO	NO	P1	1	TRUE	FALSE	4.31	2	1	4	C	4	2	2	2	0	(2, RS)	1	2	chiral	C1	2	2	2	Wa-could be Diast	contains following chiral atom(s)C	NA	NA	8.025	8.3162	13.1094	78.58	72.622	63.302	743.846	1.17112	C14 H18 N2 O3	(5S)-5-Allyl-5-((2R)-hex-3-yn-2-yl)-1-methylbarbituric acid	at 297 K	None	None	colorless	None	None	hexane	None	H.Brunner, K.-P.Ittner, D.Lunz, S.Schmatloch, T.Schmidt, M.Zabel
HUWHUF	CHIRAL	Enantiopure	NO	NO	P1	1	TRUE	FALSE	3.27	2	1	4	C	4	4	0	4	0	(2, SS)	1	2	chiral	C1	2	2	2	Wa-could be Diast	contains following chiral atom(s)C	NA	NA	8.5574	9.8938	14.8351	91.403	93.658	97.92	1240.8	1.37174	C27 H26 F2 N2 O6	1,1-bis(4-fluorophenyl)propan-2-yl N-3-(acetyloxy)-4-methoxypyridine-2-carbonylalaninate	100 K	None	None	colorless	None	None	None	None	N.R.Babij, Nakyen Choy, M.A.Cismesia, D.J.Couling, N.M.Hough, P.L.Johnson, J.Klosin, Xiaoyong Li, Yu Lu, E.O.McCusker, K.G.Meyer, J.M.Renga, R.B.Rogers, K.E.Stockman, N.J.Webb, G.T.Whiteker, Yuanming Zhu
HUXBOR	ACHIRAL	+ achiral molecule	NO	NO	P1	1	TRUE	FALSE	3.65	0	0	0	No Chiral atom	0	0	0	0	0						1	1	1	NA	contains following chiral atom(s)No Chiral atom	NA	NA	8.5317	9.7835	11.7665	112.465	102.759	96.788	862.554	1.41002	C36 H40 As2 Li2 O6	bis((Î¼2-1,3-Diphenyl-2-arsa-1,3-propanedionato)-(diethyl ether)-lithium)	at 100 K	None	decomposes at 397-399 K	red	None	None	None	None	S.Bruce, D.E.Hibbs, C.Jones, J.W.Steed, R.C.Thomas, T.C.Williams
HUXZIL	CHIRAL	Enantiopure	NO	NO	P1	1	TRUE	FALSE	3.26	1	1	4	C	4	3	2	2	0	(1, RSSR)	1	1	chiral	C1	1	1	1	W1_enantiopure AU	contains following chiral atom(s)C	NA	NA	6.172	9.8253	9.9996	88.876	82.437	89.162	600.958	1.38002	C27 H31 Br1 O4	2-isopropyl-5-methylcyclohexyl 2-(4-bromophenoxy)-1-oxo-1,2,3,4-tetrahydronaphthalene-2-carboxylate	120 K	None	None	colorless	None	None	None	None	K.Shibatomi, M.Kotozaki, N.Sasaki, I.Fujisawa, S.Iwasa
HUYTIH	CHIRAL	Enantiopure	NO	NO	P1	1	TRUE	FALSE	4.51	2	1	4	C	4	2	0	4	0	(2, SS)	1	2	chiral	C1	2	2	2	Wa-could be Diast	contains following chiral atom(s)C	NA	NA	7.4773	11.7162	12.747	63.437	89.061	81.803	987.211	1.36049	C23 H20 N2 O5	ethyl (7a-hydroxy-10-methyl-8-oxo-7a,13a-dihydrobenzoe1benzopyrano3,2-bindol-7(8H)-yl)carbamate	293 K	None	None	None	None	None	None	None	Jiayan Zhang, Min Liu, Min Huang, Hui Liu, Yingkun Yan, Zhouyu Wang, Xiaomei Zhang
HUYTIH01	CHIRAL	Enantiopure	NO	NO	P1	1	TRUE	FALSE	4.51	2	1	4	C	4	2	0	4	0	(2, SS)	1	2	chiral	C1	2	2	2	Wa-could be Diast	contains following chiral atom(s)C	NA	NA	7.4773	11.7162	12.747	63.437	89.061	81.803	987.211	1.36049	C23 H20 N2 O5	ethyl (7a-hydroxy-10-methyl-8-oxo-7a,13a-dihydrobenzoe1benzopyrano3,2-bindol-7(8H)-yl)carbamate	293 K	None	None	colorless	None	None	None	None	Jiayan Zhang, Min Liu, Min Huang, Hui Liu, Yingkun Yan, Zhouyu Wang, Xiaomei Zhang
HUZWAC	CHIRAL	Enantiopure	NO	NO	P1	1	TRUE	FALSE	2.99	1	1	1	C	1	1	1	0	0	(1, R)	1	1	chiral	C1	1	1	1	W2_enantiopure AU	contains following chiral atom(s)C	NA	NA	5.9629	9.6761	9.6943	83.833	82.215	89.828	550.938	1.38101	C23 H29 B1 Br1 N1 O3	4-Bromo-2-t-butyl-3-phenyl-6-(4,4,5,5-tetramethyl-1,3,2-dioxaborolan-2-yl)-2,3-dihydro-1,2-benzoxazole	100 K	None	None	colorless	None	None	None	None	E.Demory, K.Devaraj, A.Orthaber, P.J.Gates, L.T.Pilarski
IBAYOB	CHIRAL	Enantiopure	NO	NO	P1	1	TRUE	FALSE	3.98	2	1	4	C	4	4	0	4	0	(2, SS)	1	2	chiral	C1	2	2	2	Wa-could be Diast	contains following chiral atom(s)C	NA	NA	7.7765	8.343	9.3377	91.786	106.387	90.049	580.902	1.33925	C11 H14 N4 O2	3,3-(2,2-Dimethyl-1,3-dioxolane-4,5-diyl)bis(1H-pyrazole)	at 150 K	None	None	colorless	None	None	None	None	T.Jozak, Yu Sun, W.Thiel
IBENEK	CHIRAL	Enantiopure	NO	NO	P1	1	TRUE	FALSE	2.98	2	1	2	C	2	2	2	0	0	(2, R)	1	2	chiral	C1	2	2	2	Wa-could be Diast	contains following chiral atom(s)C	NA	NA	5.6076	9.3875	12.8524	70.347	89.0054	83.0633	632.296	1.56082	C14 H14 Br1 F1 O1	(R,E)-3-(2-(4-Bromophenyl)-1-fluorovinyl)cyclohexanone	at 293 K	None	None	None	None	None	isopropanol/hexane	None	C.B.Jacobsen, M.Nielsen, D.Worgull, T.Zweifel, E.Fisker, K.A.Jorgensen
IBIJAF01	ACHIRAL	+ achiral molecule	NO	NO	P1	1	TRUE	FALSE	4.12	0	0	0	No Chiral atom	0	0	0	0	0						4	4	4	NA	contains following chiral atom(s)No Chiral atom	NA	NA	7.5021	10.2661	12.1314	74.936	84.923	78.307	882.863	1.40839	C9 H9 N5	6-phenyl-1,3,5-triazine-2,4-diamine	at 293 K	None	None	colorless	polymorph II	None	None	None	G.Sundaramoorthy, J.S.Nirmalram, S.Ebenezer, P.T.Muthiah
IBIMEO	CHIRAL	Enantiopure	NO	NO	P1	1	TRUE	FALSE	4.52	2	1	12	C	12	8	4	8	0	(2, SSSRRS)	1	2	chiral	C1	2	2	2	Wa-could be Diast	contains following chiral atom(s)C	NA	NA	9.5443	9.6448	10.8445	102.54	109.711	90.785	913.242	1.21625	C20 H30 O4	1Î±,7Î²,14Î±-trihydroxy-isopimara-8(9),15-dien-6-one	103.1 K	None	442-443 K	colorless	None	None	methanol/water	None	Xiao-Jing Lv, Yong Li, Shuang-Gang Ma, Jing Qu, Yun-Bao Liu, Li Li, Ru-Bing Wang, Shi-Shan Yu
IBORIE	ACHIRAL	+ achiral molecule	NO	NO	P1	1	TRUE	FALSE	4.5	0	0	0	No Chiral atom	0	0	0	0	0						2	2	2	NA	contains following chiral atom(s)No Chiral atom	NA	NA	5.8988	11.1914	11.6421	106.781	101.292	96.496	709.709	1.29309	C18 H16 N2 O1	9-methyl-5-phenyl-1,2-dihydro-3H-pyrazolo1,2-acinnolin-3-one	293 K	None	None	light yellow	None	None	None	None	Hai-Shan Jin, Ya-Zhen Du, Qing-Yang Zhao, Li-Ming Zhao
ICERUF	CHIRAL	Enantiopure	NO	NO	P1	1	TRUE	FALSE	4.69	3	1	12	C	12	9	0	12	0	(3, SSSS)	1	3	chiral	C1	3	3	3	Wa-could be Diast	contains following chiral atom(s)C	NA	NA	11.646	13.795	14.559	76.422	78.028	74.5	2164.64	1.27049	C33 H30 Cl1 N3 O3	N-((1-(Benzoylamino)-2-(4-chlorophenyl)-3-phenylcyclopropyl)carbonyl)-N-methylphenylalaninamide	at 294 K	None	None	colorless	None	None	None	None	Wan-Yun Huang, Gui-Fa Su, Cheng-Xue Pan, Jian-Ke Qin, Xiang-Hui Yi
ICOMAO	CHIRAL	Enantiopure	NO	NO	P1	1	TRUE	FALSE	3.11	1	1	4	C	4	3	2	2	0	(1, SRRS)	1	1	chiral	C1	1	1	1	W1_enantiopure AU	contains following chiral atom(s)C	NA	NA	7.81	7.899	12.125	87.03	77.91	83.28	726.103	1.09961	C26 H48 O4 Si2	9-(t-Butyldimethylsiloxy)-11-(triethylsiloxy)-6,6-dimethyl-5,7-dioxatricyclo(9.3.0.04,8)tetradeca-1(14),2-diene	at 150.0 K	None	None	colorless	None	None	None	None	F.-D.Boyer, I.Hanna, L.Ricard
IDENIO	CHIRAL	Enantiopure	NO	NO	P1	1	TRUE	FALSE	4.49	2	1	12	C	12	12	8	4	0	(2, RRSSRR)	1	2	chiral	C1	2	2	2	Wa-could be Diast	contains following chiral atom(s)C	NA	NA	8.186	11.563	12.246	83.499	87.318	85.401	1147.15	1.17416	C27 H35 N1 O2	11-(2-methoxyphenyl)-N-(1-methyl-1-(2-hydroxy-4-methylcyclohexyl)ethyl)-9-azatricyclo(6.2.1.02,7)undeca-2,4,6-triene	at 293 K	None	None	None	None	None	None	None	R.Pedrosa, C.Andres, J.M.Iglesias, A.Perez-Encabo
IDIMUD	DIASTEREOMER		NO	NO	P1	1	TRUE	FALSE	3.79	2	1	6	C	6	2	3	3	0	(1, RSR), (1, SSR)	2	2	diast	C1	2	2	2	DIAST-1, contains DIAST	contains following chiral atom(s)C	NA	NA	8.5321	12.0941	16.6243	70.7225	85.0894	71.5179	1535.38	1.35658	C29 H35 Cl1 O9 S2	(2R)-3-((1S,4R)-7,7-Dimethyl-2-oxobicyclo(2.2.1.)hept-1-ylmethanesulfonyloxy)-2-methyl-2-(toluene-4-sulfonyloxymethyl)propyl 4-chlorobenzoate (2S)-3-((1S,4R)-7,7-Dimethyl-2-oxobicyclo(2.2.1.)hept-1-ylmethanesulfonyloxy)-2-methyl-2-(toluene-4-sulfonyloxymethyl)propyl 4-chlorobenzoate	at 291.0 K	None	347-349K	colorless	None	None	methanol/hexane	None	M.Linker, M.Schurmann, H.Preut, W.Kreiser
IDISUJ	CHIRAL	Enantiopure	NO	NO	P1	1	TRUE	FALSE	3.19	2	1	2	C	2	2	0	2	0	(2, S)	1	2	chiral	C1	2	2	2	Wa-could be Diast	contains following chiral atom(s)C	NA	NA	9.5252	11.3143	13.6606	84.852	86.093	71.928	1392.68	1.21531	C33 H35 N1 O4	(M,P,10S)-10-Benzyl-9-(2,4,6-trimethoxybenzyl)-12-oxa-9-azatricyclo(11.4.0.02,7)heptadeca-1(14),2,4,6,15,17-hexaene	at 213 K	None	None	colorless	None	None	None	None	D.R.Spring, S.Krishnan, H.E.Blackwell, S.L.Schreiber
IDOBOW	CHIRAL	Enantiopure	NO	NO	P1	1	TRUE	FALSE	3.65	2	1	2	C	2	2	0	2	0	(2, S)	1	2	chiral	C1	2	2	2	Wa-could be Diast	contains following chiral atom(s)C	NA	NA	8.8333	10.5515	16.243	108.378	91.566	95.637	1427.03	1.11413	C27 H46 N2 O3 S1	t-butyl (1-{2-2,4,6-tris(propan-2-yl)benzene-1-sulfinylethyl}piperidin-3-yl)carbamate	150.0 K	None	None	colorless	None	None	None	None	Shiwei Lu, Zipeng Wang, Xiang Gao, Kai Chen, Shifa Zhu
IDOQEA	ACHIRAL	+ achiral molecule	NO	NO	P1	1	TRUE	FALSE	4.55	0	0	0	No Chiral atom	0	0	0	0	0						8	4	4	NA	contains following chiral atom(s)No Chiral atom	NA	NA	6.6116	12.1182	15.0179	110.945	98.955	92.334	1103.97	1.35521	C10 H13 N3 O2,H2 O1	N-(4-hydroxybutylidene)pyridine-4-carbohydrazide monohydrate	200 K	None	None	light colorless	None	None	None	None	C.I.Tanase, C.Draghici, S.Shova, Anamaria Hanganu, E.Gal, C.V.A.Munteanu
IDOXUR01	CHIRAL	Enantiopure	NO	NO	P1	1	TRUE	FALSE	2.14	1	1	3	C	3	3	2	1	0	(1, RRS)	1	1	chiral	C1	1	1	1	W1_enantiopure AU	contains following chiral atom(s)C	NA	NA	4.9847	6.8193	9.2133	73.496	78.472	81.272	292.712	2.00878	C9 H11 I1 N2 O5	1-(4-hydroxy-5-(hydroxymethyl)tetrahydrofuran-2-yl)-5-iodopyrimidine-2,4(1H,3H)-dione	296 K	None	None	colorless	None	None	None	None	S.Mondal, D.Manna, G.Mugesh
IDUSOT	CHIRAL	Enantiopure	NO	NO	P1	1	TRUE	FALSE	4.89	2	1	2	C	2	2	0	2	0	(2, S)	1	2	chiral	C1	2	2	2	Wa-could be Diast	contains following chiral atom(s)C	NA	NA	9.0348	9.1064	11.2425	100.035	104.789	111.434	794.847	1.31372	C20 H26 O3	2-1-(2H-1,3-benzodioxol-5-yl)propan-2-yladamantan-2-ol	123 K	None	None	colorless	None	None	None	None	A.Kremsmair, H.R.Wilke, J.H.Harenberg, B.R.G.Bissinger, M.M.Simon, N.Alandini, P.Knochel
IDUYAK	CHIRAL	Enantiopure	NO	NO	P1	1	TRUE	FALSE	4.68	2	1	4	C	4	0	0	4	0	(2, SS)	1	2	chiral	C1	2	2	2	Wa-could be Diast	contains following chiral atom(s)C	NA	NA	11.494	11.7725	12.7954	78.086	76.309	77.663	1621.03	1.24693	C32 H36 N2 O10	di-t-butyl 3,3-bis(2-methoxy-2-oxoethyl)-2,2-dioxo-2,2,3,3-tetrahydro-1H,1H-3,3-biindole-1,1-dicarboxylate	150.0 K	None	None	colorless	None	None	None	None	Si-Kai Chen, Wen-Qiang Ma, Zhi-Bo Yan, Fu-Min Zhang, Shao-Hua Wang, Yong-Qiang Tu, Xiao-Ming Zhang, Jin-Miao Tian
IFAFUS	CHIRAL	Enantiopure	NO	NO	P1	1	TRUE	FALSE	4.23	3	1	15	C	15	15	9	6	0	(3, SRRSR)	1	3	chiral	C1	3	3	3	Wa-could be Diast	contains following chiral atom(s)C	NA	NA	8.2828	8.5783	12.4406	80.819	87.674	89.574	871.891	1.41828	C10 H16 O7	6,7,8-Trimethoxyhexahydropyrano3,2-d1,3dioxin-2-one	at 110 K	None	None	colorless	None	None	None	None	K.Mikami, A.T.Lonnecker, T.P.Gustafson, N.F.Zinnel, Pei-Jing Pai, D.H.Russell, K.L.Wooley
IFAKUV	CHIRAL	Enantiopure	NO	NO	P1	1	TRUE	FALSE	3.59	1	1	3	C	3	3	1	2	0	(1, RSS)	1	1	chiral	C1	1	1	1	W1_enantiopure AU	contains following chiral atom(s)C	NA	NA	5.723	9.215	10.156	83.64	78.29	74.64	504.798	1.3045	C23 H24 O2 S2	(1R,2S)-1-Phenyl-2-((naphth-2-yl)thio)-2-(((2S)-tetrahydropyran-2-yl)thio)ethanol	at 193 K	None	400 K	colorless	None	None	ethanol	None	K.Sipila, J.Kansikas
IFUFIB	CHIRAL	Enantiopure	NO	NO	P1	1	TRUE	FALSE	2.82	1	1	1	C	1	1	1	0	0	(1, R)	1	1	chiral	C1	1	1	1	W2_enantiopure AU	contains following chiral atom(s)C	NA	NA	5.6888	5.97	8.8898	93.367	93.923	108.637	284.375	1.44875	C10 H11 Cl2 N1 O2	2,2-dichloro-3-hydroxy-N-phenylbutanamide	200 K	None	None	colorless	None	None	None	None	Long-Sheng Zheng, P.Phansavath, V.Ratovelomanana-Vidal
IGAFAY	ACHIRAL	+ achiral molecule	NO	NO	P1	1	TRUE	FALSE	2.77	0	0	0	No Chiral atom	0	0	0	0	0						2	2	2	NA	contains following chiral atom(s)No Chiral atom	NA	NA	8.5276	8.5517	8.6259	92.919	94.209	94.146	624.709	1.26653	C11 H14 N2 O4	(E)-Methyl N-(3,4-dimethoxybenzylidene)hydrazinecarboxylate	at 273 K	None	468-470K	colorless	None	None	ethanol	None	Lu-Ping Lv, Xiao-Min Ding, Yong-Zhao Zhang, Wei-Wei Li, Xian-Chao Hu
IGAFEE	CHIRAL	Enantiopure	NO	NO	P1	1	TRUE	FALSE	2.82	1	1	2	C	2	2	0	2	0	(1, SS)	1	1	chiral	C1	1	1	1	W1_enantiopure AU	contains following chiral atom(s)C	NA	NA	5.5579	11.6199	13.7205	68.46	86.988	76.575	801.171	1.42958	C36 H31 N7 O6 S1	(S)-4-benzyl-1-(5-((S)-5-benzyl-2-oxo-3-phenylimidazolidin-1-yl)pyrazin-2-yl)-3-((2-nitrophenyl)sulfonyl)imidazolidin-2-one	100 K	None	None	pale colorless	None	None	None	None	Z.Lockhart, P.C.Knipe
IGAKOT	CHIRAL	Enantiopure + achiral molecule	NO	NO	P1	1	TRUE	FALSE	2.66	1	1	4	C	4	1	1	3	0	(1, SSSR)	1	1	chiral	C1	2	1	1	W1_enantiopure AU	contains following chiral atom(s)C	NA	NA	7.01728	8.2752	10.7566	93.959	106.285	95.686	593.545	1.34167	C26 H29 N3 O4,C1 H4 O1	2,2,8,8-tetramethyl-2,2,3,8,8a,9-hexahydro-1H,5H,6H,7H,8H,10H-spiro5a,9a-(epiminomethano)cyclopentafindolizine-7,6-pyrano3,2-findole-5,7,10-trione methanol solvate	100 K	None	None	colorless	None	None	None	None	Huaqiang Li, Weiguang Sun, Mengyi Deng, Qun Zhou, Jianping Wang, Junjun Liu, Chunmei Chen, Changxing Qi, Zengwei Luo, Yongbo Xue, Hucheng Zhu, Yonghui Zhang
IGARIT	ACHIRAL	+ achiral molecule	NO	NO	P1	1	TRUE	FALSE	4.52	0	0	0	No Chiral atom	0	0	0	0	0						10	2	2	NA	contains following chiral atom(s)No Chiral atom	NA	NA	6.6842	9.6173	25.4682	95.78	95.669	90.028	1620.82	1.43172	2(C18 H12 O4),C2 H6 O1 S1,2(H2 O1)	5-(Naphthalen-1-yl)isophthalic acid dimethyl sulfoxide solvate dihydrate	at 93 K	None	None	colorless	None	None	None	None	A.Vetter, W.Seichter, E.Weber
IGAVIW	CHIRAL	Enantiopure	NO	NO	P1	1	TRUE	FALSE	3.2	3	1	6	C	6	6	3	3	0	(3, SR)	1	3	chiral	C1	3	3	3	Wa-could be Diast	contains following chiral atom(s)C	NA	NA	6.2295	11.8164	12.8744	84.547	86.582	76.412	916.312	1.24647	C14 H15 N1 O2	4-Phenyl-3-(spiro2.2pent-1-yl)-1,3-oxazolidin-2-one	at 173 K	None	67-68 deg.C	colorless	None	None	None	None	Ting Lu, R.Hayashi, R.P.Hsung, K.A.DeKorver, A.G.Lohse, Zhenlei Song, Yu Tang
IGEKEN	CHIRAL	Enantiopure	NO	NO	P1	1	TRUE	FALSE	4.01	4	1	4	C	4	4	4	0	0	(4, R)	1	4	chiral	C1	4	4	4	Wa-could be Diast	contains following chiral atom(s)C	NA	NA	10.0693	10.121	18.5597	85.6232	85.2461	60.4624	1638.59	1.17715	C21 H22 O1	3-((4-methoxyphenyl)methylidene)-5-methyl-2,3,4,5-tetrahydro-1,1-biphenyl	150 K	None	None	colorless	None	None	None	None	C.M.Farley, K.Sasakura, You-Yun Zhou, V.V.Kanale, C.Uyeda
IGIDOU	CHIRAL	Enantiopure	NO	NO	P1	1	TRUE	FALSE	2.71	1	1	5	C	5	3	2	3	0	(1, RRSSS)	1	1	chiral	C1	1	1	1	W1_enantiopure AU	contains following chiral atom(s)C	NA	NA	6.3062	7.6848	9.7183	87.904	80.198	87.694	463.505	1.28409	C21 H26 O5	6-2-(furan-3-yl)-2-oxoethyl-9-methoxy-1,6,7-trimethyl-4,5,6,7,8,9-hexahydro-1,4-methano-3-benzoxepin-2(1H)-one	100.0 K	None	None	colorless	None	None	None	None	Rong Wang, Run-Zhu Fan, Fu-Qiang Ni, Jun Sang, Xing-Lin Xie, Si-Yuan Luo, Gui-Hua Tang, Sheng Yin
IGUMAY	ACHIRAL	+ achiral molecule	NO	NO	P1	1	TRUE	FALSE	2.67	0	0	0	No Chiral atom	0	0	0	0	0						2	2	2	NA	contains following chiral atom(s)No Chiral atom	NA	NA	8.2307	11.1691	15.0551	110.307	102.085	97.401	1238.21	1.369	C26 H24 O7 P2	(1-Hydroxyethylidene)-1,1-bis(phosphonic acid) tetraphenyl ester	at 120 K	None	None	colorless	None	None	toluene	None	P.A.Turhanen, M.J.Ahlgren, T.Jarvinen, J.J.Vepsalainen
IHAYEX	ACHIRAL	+ achiral molecule	NO	NO	P1	1	TRUE	FALSE	4.54	0	0	0	No Chiral atom	0	0	0	0	0						2	2	2	NA	contains following chiral atom(s)No Chiral atom	NA	NA	9.4846	11.7163	18.1232	82.4563	80.9773	85.2871	1967.89	1.35501	C42 H42 O12 S2	tetramethyl 4,4-dipentyl-1,1-bidibenzob,dthiophene-2,2,3,3-tetracarboxylate 5,5,5,5-tetraoxide	173 K	None	None	None	None	None	None	None	Y.Tahara, R.Matsubara, T.Shibata
IHOBEP	ACHIRAL	+ achiral molecule	NO	NO	P1	1	TRUE	FALSE	3.37	0	0	0	No Chiral atom	0	0	0	0	0						2	2	2	NA	contains following chiral atom(s)No Chiral atom	NA	NA	7.1378	9.8466	14.7942	88.9786	79.0044	74.6213	983.557	1.36902	C27 H19 N1 O3	2-hydroxy-2-(pyridin-2-yl)methoxy1,1-binaphthalene-3-carbaldehyde	93 K	None	None	pale yellow	None	None	None	None	Y.Sasaki, S.Kojima, V.Hamedpour, R.Kubota, S.Takizawa, Isao Yoshikawa, H.Houjou, Yuji Kubo, T.Minami
IHOXUY	CHIRAL	Enantiopure	NO	NO	P1	1	TRUE	FALSE	4.7	2	1	8	C	8	8	4	4	0	(2, SRSR)	1	2	chiral	C2	2	2	2	Wa-could be Diast	contains following chiral atom(s)C	NA	NA	8.2496	10.1013	11.6656	82.558	82.658	82.064	948.696	1.19167	C18 H28 O6	(6R,14R)-Dimethyl-(7R,15R)-dimethoxy-1,9-dioxacyclohexadeca-(4E,12E)-diene-2,10-dione	at 173 K	None	383-385 K	colorless	None	None	hexanes/ dichloromethane	None	Qibin Su, A.B.Beeler, E.Lobkovsky, J.A.Porco Junior, J.S.Panek
IHULUU	RACEMATE	Strict definition of kryptoracemate	KRYPTORACEMIC	NO	P1	1	TRUE	FALSE	4.06	2	1	2	C	2	2	1	1	0	(1, S), (1, R)	2	2	racemic	C1	2	2	2	RAC-1	contains following chiral atom(s)C	NA	NA	6.3305	7.859	10.7001	86.895	83.042	80.99	521.568	1.70087	C12 H11 Br1 O2	5-bromo-3-hydroxyspirocyclobutane-1,2-inden-1(3H)-one	293 K	None	None	colorless	None	None	None	None	Tanmoy Chanda, Sushobhan Chowdhury, N.Anand, S.Koley, Ashutosh Gupta, Maya Shankar Singh
IHUWOX	ACHIRAL	+ achiral molecule	NO	NO	P1	1	TRUE	FALSE	4.09	0	0	0	No Chiral atom	0	0	0	0	0						2	1	1	NA	contains following chiral atom(s)No Chiral atom	NA	NA	8.661	8.827	9.346	67.22	86.86	79.52	647.689	1.23236	C20 H14 O2,C8 H18 O1 S2	(R)-2,2-Dihydroxy-1,1-binapthyl (S)-t-butylthiosulfinate	at 289 K	None	409-411 K	None	None	None	ethanol/hexane	None	Jian Liao, Xiaoxia Sun, Xin Cui, Kaibei Yu, Jin Zhu, Jingen Deng
IJOWUA	ACHIRAL	+ achiral molecule	NO	NO	P1	1	TRUE	FALSE	3.03	0	0	0	No Chiral atom	0	0	0	0	0						1	1	1	NA	contains following chiral atom(s)No Chiral atom	NA	NA	3.8879	6.751	13.7788	97.62	96.177	92.017	355.931	1.61437	C15 H8 Cl4 O1	(E)-3-(4-Chlorophenyl)-1-(2,3,4-trichlorophenyl)prop-2-en-1-one	at 296 K	None	None	yellow	None	None	None	None	H.-K.Fun, C.S.Yeap, D.J.Prasad, S.P.Nayak, K.Laxmana
IKAHOS	ACHIRAL	+ achiral molecule	NO	NO	P1	1	TRUE	FALSE	4.43	0	0	0	No Chiral atom	0	0	0	0	0						2	2	2	NA	contains following chiral atom(s)No Chiral atom	NA	NA	7.1044	9.7393	10.9236	109.731	91.799	100.679	695.511	1.20479	C16 H16 N2 O1	N-(4-(E)-(4-Methylphenyl)iminomethylphenyl)acetamide	at 296 K	None	None	colorless	None	None	None	None	M.N.Tahir, H.A.Shad
IKEDUY	ACHIRAL	+ achiral molecule	NO	NO	P1	1	TRUE	FALSE	3.06	0	0	0	No Chiral atom	0	0	0	0	0						1	1	1	NA	contains following chiral atom(s)No Chiral atom	NA	NA	4.4235	5.685	8.705	80.819	79.943	81.804	211.298	1.43165	C9 H10 O4	2-Hydroxyethyl 4-hydroxybenzoate	at 293 K	None	None	colorless	None	None	None	None	M.Jeyalaxmi, G.Jagadeesan, J.Arulmoli, D.R.Singh, S.Aravindhan
ILAROF	CHIRAL	Enantiopure	NO	NO	P1	1	TRUE	FALSE	2.17	2	1	6	C	6	4	2	4	0	(2, SRS)	1	2	chiral	C1	2	2	2	Wa-could be Diast	contains following chiral atom(s)C	NA	NA	6.3812	10.9443	12.5497	91.187	95.078	95.29	868.916	1.42672	C20 H21 Br1 O2	2-(2-bromophenyl)methyl-3-hydroxy-2-methyl-5-phenylcyclohexan-1-one	193 K	None	None	colorless	None	None	None	None	Yi-Xuan Ding, Zhou-Hao Zhu, Han Wang, Chang-Bin Yu, Yong-Gui Zhou
ILEBIN01	ACHIRAL	+ achiral molecule	NO	NO	P1	1	TRUE	FALSE	4.98	0	0	0	No Chiral atom	0	0	0	0	0						1	1	1	NA	contains following chiral atom(s)No Chiral atom	NA	NA	4.9177	9.0079	10.8617	73.1	86.036	88.774	459.272	1.8444	C20 H12 Br2 F2 N2 O2	2,5-dibromo-N1,N4-bis(2-fluorophenyl)benzene-1,4-dicarboxamide	151.7 K	None	None	white	polymorph B	None	None	None	Hao Liu, Wentao Liu, Naoki Ando, S.Yamaguchi, Hongyu Zhang
ILUKIM	CHIRAL	Enantiopure	NO	NO	P1	1	TRUE	FALSE	2.25	2	1	18	C	18	12	6	12	0	(2, SSSSRSRRS)	1	2	chiral	C1	2	2	2	Wa-could be Diast	contains following chiral atom(s)C	NA	NA	10.8936	11.2528	16.6094	98.517	98.07	118.214	1721.86	1.23392	C38 H55 Br1 O3	23-methoxylanosta-7,24-dien-3-yl 4-bromobenzoate	153 K	None	None	None	None	None	None	None	Pei-Yuan Yang, Peng Zhao, Ming Bai, Xiao-Qi Yu, Hui Ren, Qing-Bo Liu, Bin Lin, Shao-Jiang Song, Xiao-Xiao Huang
IMAGUA	CHIRAL	Enantiopure	NO	NO	P1	1	TRUE	FALSE	4.86	1	1	3	C	3	2	2	1	0	(1, SRR)	1	1	chiral	C1	1	1	1	W1_enantiopure AU	contains following chiral atom(s)C	NA	NA	6.0963	8.7014	8.705	66.516	73.36	87.831	404.254	1.33597	C13 H25 Br1 O4	t-butyl 2-(1-bromopropyl)-2,3-dihydroxyhexanoate	100 K	None	None	colorless	None	None	pentane/diethyl ether	None	J.Malassis, N.Bartlett, Kane Hands, M.D.Selby, B.Linclau
IMISAA	ACHIRAL	+ achiral molecule	NO	NO	P1	1	TRUE	FALSE	3.07	0	0	0	No Chiral atom	0	0	0	0	0						4	4	4	NA	contains following chiral atom(s)No Chiral atom	NA	NA	12.7971	12.8656	14.0933	88.968	86.108	66.582	2124.21	1.22404	C24 H25 N1 O4	(+)-(R)-2-(2-(3,4-Dimethoxyphenyl)-5,5-dimethylhexa-2,3-dien-1-yl)-1H-isoindole-1,3(2H)-dione	100 K	None	390 K	colorless	None	None	dichloromethane/n-hexane	None	J.Ruchti, E.M.Carreira
IMOCIY	CHIRAL	Enantiopure	NO	NO	P1	1	TRUE	FALSE	3.09	1	1	8	C	8	6	1	7	0	(1, SSRSSSSS)	1	1	chiral	C1	1	1	1	W1_enantiopure AU	contains following chiral atom(s)C	NA	NA	6.2267	6.7164	13.4269	77.552	80.072	68.189	506.427	1.18876	C23 H38 O3	17-(2-methyl-1,3-dioxolan-2-yl)androstan-3-ol	100 K	None	None	colorless	None	None	None	None	C.Obradors, R.M.Martinez, R.A.Shenvi
IMOMAA	ACHIRAL	+ achiral molecule	NO	NO	P1	1	TRUE	FALSE	3.3	0	0	0	No Chiral atom	0	0	0	0	0						3	1	1	NA	contains following chiral atom(s)No Chiral atom	NA	NA	8.2876	9.3557	15.1595	87.08	81.883	73.572	1116.06	1.36151	C40 H38 N2 O8 S2,2(C4 H8 O2)	N-(3-(2,3-Dihydroxy-4-(2-hydroxy-3,6-dimethyl-5-(((4-methylphenyl)sulfonyl)amino)phenyl)-1-naphthyl)-4-hydroxy-2,5-dimethylphenyl)-4-methylbenzenesulfonamide ethyl acetate solvate	100 K	None	None	colorless	None	None	None	None	Jin-Zheng Wang, Jin Zhou, Chang Xu, Hongbin Sun, L.Kurti, Qing-Long Xu
INAGAH	CHIRAL	Enantiopure	NO	NO	P1	1	TRUE	FALSE	3.74	2	1	2	C	2	2	2	0	0	(2, R)	1	2	chiral	C1	2	2	2	Wa-could be Diast	contains following chiral atom(s)C	NA	NA	9.72	10.559	10.935	69.4	76.957	77.133	1010.72	1.30908	C18 H29 N3 O2 Se1	t-butyl (3-methyl-1-(((3-methylphenyl)carbamoselenoyl)amino)butan-2-yl)carbamate	100 K	None	None	colorless	None	None	None	None	Uday Das, B.Chattopadhyay, D.K.Hazra, V.V.Sureshbabu, A.K.Mukherjee
INANUG	CHIRAL	Enantiopure	NO	NO	P1	1	TRUE	FALSE	3.18	1	1	4	C Si	3	3	2	2	0	(1, RSRS)	1	1	chiral	C1	1	1	1	W1_enantiopure AU	contains following chiral atom(s)C,Si	NA	NA	8.1193	8.6964	9.1471	112.117	91.06	111.386	547.98	1.14733	C25 H34 O1 Si1	(SiS)-1-(1R,2S,5R)-Menthoxy-1-phenyl-1-sila-1,2,3,4-tetrahydronaphthalene	at 100 K	None	None	white	None	None	None	None	M.Oestreich, U.K.Schmid, G.Auer, M.Keller
INEKOE	CHIRAL	Enantiopure	NO	NO	P1	1	TRUE	FALSE	3.83	6	1	18	C	18	18	0	18	0	(6, SSS)	1	6	chiral	C1	6	6	6	Wa-could be Diast	contains following chiral atom(s)C	NA	NA	11.7245	11.8474	17.2813	96.797	90.853	90.566	2383.16	1.19703	C13 H22 N2 O5	N-(methoxycarbonyl)valyl-5-methylproline	100.2 K	None	None	colorless	None	None	None	None	A.L.Rheingold
INUQIT	CHIRAL	Enantiopure	NO	NO	P1	1	TRUE	FALSE	3.23	3	1	6	C	6	3	0	6	0	(3, SS)	1	3	chiral	C1	3	3	3	Wa-could be Diast	contains following chiral atom(s)C	NA	NA	11.3141	13.0066	13.3059	107.027	97.7315	113.173	1650.25	1.44713	C24 H19 Br1 N2 O2 S1	N-(1-(4-(4-bromophenyl)-5-oxo-2-phenyl-4,5-dihydro-1,3-thiazol-4-yl)ethyl)benzamide	123 K	None	None	colorless	None	None	None	None	Jun Kikuchi, N.Momiyama, M.Terada
INUSER	CHIRAL	Enantiopure + achiral molecule	NO	NO	P1	1	TRUE	FALSE	4.35	3	1	18	C	18	15	9	9	0	(3, RSSRSR)	1	3	chiral	C1	5	3	3	Wa-could be Diast	contains following chiral atom(s)C	NA	NA	9.7574	10.945	18.3652	102.359	99.183	101.095	1838.34	1.24618	C23 H34 O8,0.67(C1 H4 O1)	10-hydroxy-6,10-dimethyl-3-methylene-2,5-dioxododecahydrocyclodecabfuran-4,11-diyl bis(2-methylpropanoate) methanol solvate	105.5 K	None	None	None	None	None	None	None	Tao Zhang, Jin-Guang Si, Qiu-Bo Zhang, Gang Ding, Zhong-Mei Zou
INUWOF	CHIRAL	Enantiopure	NO	NO	P1	1	TRUE	FALSE	2.7	1	1	4	C	4	4	2	2	0	(1, RSRS)	1	1	chiral	C1	1	1	1	W1_enantiopure AU	contains following chiral atom(s)C	NA	NA	6.269	8.088	9.868	68.658	78.278	87.8	455.967	1.41992	C20 H20 Cl1 N1 O3 S1	(3S*,3aR*,4S*,6aR*)-4-chloro-1-((4-methylphenyl)sulfonyl)-3-phenylhexahydrocyclopentabpyrrol-2(1H)-one	200 K	None	None	pale yellow	None	None	None	None	M.-C.P.Yeh, Yuan-Shin Shiue, Hsin-Hui Lin, Tzu-Yu Yu, Ting-Chia Hu, Jia-Jyun Hong
IPACUA	CHIRAL	Enantiopure + achiral molecule	NO	NO	P1	1	TRUE	FALSE	2.77	1	1	6	C	6	1	3	3	0	(1, RSRSSR)	1	1	chiral	C1	2	1	1	W1_enantiopure AU	contains following chiral atom(s)C	NA	NA	8.3012	8.4452	9.7416	88.443	68.237	69.518	590.022	1.32986	C25 H28 O7,C1 H4 O1	3a-hydroxy-2,2,3,5,7,10a-hexamethyl-11-methylidene-3,3a,5,6,10,10a-hexahydro-1H,2H,4H,6H,9H-spiro5,10b-methanobenzo3,4cyclohepta1,2-cfuran-8,3-pyran-1,4,6,9-tetrone methanol solvate	102.3 K	None	None	None	None	None	None	None	Tu-Xiang Mo, Xi-Shan Huang, Wen-Xiu Zhang, T.F.Schaberle, Jiang-Ke Qin, De-Xiong Zhou, Xiao-Ya Qin, Zhao-Long Xu, Jun Li, Rui-Yun Yang
IPAHUE	CHIRAL	Enantiopure	NO	NO	P1	1	TRUE	FALSE	4.06	1	1	2	C	2	2	0	2	0	(1, SS)	1	1	chiral	C1	1	1	1	W1_enantiopure AU	contains following chiral atom(s)C	NA	NA	5.105	9.985	11.8359	65.909	85.15	82.591	545.829	1.3218	C29 H22 O4	dimethyl 14,14a-dihydro-9aH-indeno1,2-btriphenylene-9,15-dicarboxylate	173 K	None	None	yellow	None	None	None	None	Y.Aida, H.Sugiyama, H.Uekusa, Yu Shibata, K.Tanaka
IPIXUB07	ACHIRAL	+ achiral molecule	NO	NO	P1	1	TRUE	FALSE	4.8	0	0	0	No Chiral atom	0	0	0	0	0						2	2	2	NA	contains following chiral atom(s)No Chiral atom	NA	NA	7.2466	5.4999	13.926	95.541	97.665	85.025	545.963	1.49879	C14 H14 S2	bis(4-methylphenyl) disulfide	293 K	2.2 GPa	318 K	colorless	beta polymorph	None	None	None	S.Sobczak, A.Katrusiak
IPIXUB13	ACHIRAL	+ achiral molecule	NO	NO	P1	1	TRUE	FALSE	3.99	0	0	0	No Chiral atom	0	0	0	0	0						2	2	2	NA	contains following chiral atom(s)No Chiral atom	NA	NA	7.2853	5.5183	14.024	95.302	97.371	85.321	555.359	1.47343	C14 H14 S2	bis(4-methylphenyl) disulfide	293 K	1.85 GPa	318 K	colorless	beta polymorph	None	None	None	S.Sobczak, A.Katrusiak
IPIXUB15	ACHIRAL	+ achiral molecule	NO	NO	P1	1	TRUE	FALSE	4.8	0	0	0	No Chiral atom	0	0	0	0	0						2	2	2	NA	contains following chiral atom(s)No Chiral atom	NA	NA	7.1934	5.4685	13.814	95.915	98.142	84.699	533.389	1.53412	C14 H14 S2	bis(4-methylphenyl) disulfide	295 K	2.8 GPa	318 K	colorless	beta polymorph	None	None	None	S.Sobczak, A.Katrusiak
IPUVUL	CHIRAL	Enantiopure	NO	NO	P1	1	TRUE	FALSE	4.7	1	1	1	C	1	1	0	1	0	(1, S)	1	1	chiral	C1	1	1	1	W2_enantiopure AU	contains following chiral atom(s)C	NA	NA	5.2446	5.7758	13.307	80.243	84.091	78.327	388.06	1.31515	C15 H21 N3 O4	t-butyl (1S)-2-(2E)-2-benzylidenehydrazino-1-(hydroxymethyl)-2-oxoethylcarbamate	at 120 K	None	None	colorless	None	None	None	None	R.A.Howie, M.V.N.de Souza, A.Pinheiro, C.R.Kaiser, J.L.Wardell, S.M.S.V.Wardell
IPUWAS	CHIRAL	Enantiopure	NO	NO	P1	1	TRUE	FALSE	4.24	1	1	1	C	1	1	0	1	0	(1, S)	1	1	chiral	C1	1	1	1	W2_enantiopure AU	contains following chiral atom(s)C	NA	NA	5.2538	5.7264	13.691	81.078	82.35	76.869	394.219	1.362	C15 H21 N3 O5	t-butyl (1S)-2-(2E)-2-(2-hydroxybenzylidene)hydrazino-1-(hydroxymethyl)-2-oxoethylcarbamate	at 120 K	None	None	colorless	None	None	None	None	R.A.Howie, M.V.N.de Souza, A.Pinheiro, C.R.Kaiser, J.L.Wardell, S.M.S.V.Wardell
IPUZIF	CHIRAL	Enantiopure	NO	NO	P1	1	TRUE	FALSE	3.07	2	1	6	C	6	4	4	2	0	(2, RSR)	1	2	chiral	C1	2	2	2	Wa-could be Diast	contains following chiral atom(s)C	NA	NA	8.2911	11.9378	12.6828	70.465	87.273	82.694	1173.43	1.33568	C27 H22 Cl1 N3 O3	1-benzyl-6-(2-chlorophenyl)-8-hydroxy-7,8-dihydro-1H,6H-spiroindole-3,5-pyrazolo1,2-apyridazine-1,2(1H)-dione	296 K	None	None	colorless	None	None	None	None	Boqi Gu, Shuxiao Wu, Hui Xu, Wulin Yang, Zhixiang Liu, Weiping Deng
IQIGIB	CHIRAL	Enantiopure + achiral molecule	NO	NO	P1	1	TRUE	FALSE	2.6	2	1	14	C	14	8	12	2	0	(2, SRRRRRR)	1	2	chiral	C1	3	2	2	Wa-could be Diast	contains following chiral atom(s)C	NA	NA	6.83383	10.4833	14.0971	91.0286	103.611	94.4661	977.9	1.28194	C20 H32 O6,0.5(H2 O1)	4,7,10,13a,14-pentahydroxy-4,9,9,13-tetramethyl-2,3,4,5,6,7,9,10,11,13a-decahydro-3,5a-methanocyclohepta10annulen-8(1H)-one hemihydrate	298 K	None	None	colorless	None	None	None	None	Pengfei Jin, Guijuan Zheng, Xinghua Yuan, Xiaomin Ma, Yuanyuan Feng, Guangmin Yao
IQIQOQ	CHIRAL	Enantiopure	NO	NO	P1	1	TRUE	FALSE	4.8	2	1	6	C	6	4	4	2	0	(2, RRS)	1	2	chiral	C1	2	2	2	Wa-could be Diast	contains following chiral atom(s)C	NA	NA	9.4015	9.5499	12.9102	91.586	109.357	93.844	1089.6	1.09242	C23 H43 B1 N2	3,8-diisopropyl-7,17,17-trimethyl-3,8-diaza-2-boratetracyclo8.3.3.14,7.02,9heptadecane	150.2 K	None	None	colorless	None	None	None	None	J.Lam, B.A.R.Gunther, J.M.Farrell, P.Eisenberger, B.P.Bestvater, P.D.Newman, R.L.Melen, C.M.Crudden, D.W.Stephan
IRACAH	CHIRAL	Enantiopure + achiral molecule	NO	NO	P1	1	TRUE	FALSE	4.26	1	1	2	C	2	2	2	0	0	(1, RR)	1	1	chiral	C2	3	2	2	W1_enantiopure AU	contains following chiral atom(s)C	NA	NA	10.2662	12.2121	13.5689	116.566	97.2384	98.6225	1468.07	1.47407	C28 H31 F3 N4 O6,0.5(C4 H6 O6)	6-ethyl-N-(1-glycoloylpiperidin-4-yl)-1-methyl-4-oxo-5-(2-oxo-2-phenylethyl)-3-(2,2,2-trifluoroethoxy)-4,5-dihydro-1H-pyrrolo3,2-cpyridine-2-carboxamide hemikis(tartaric acid)	100 K	None	None	colorless	None	None	None	None	K.Iwata, M.Karashima, Y.Ikeda
IRAKEU	CHIRAL	Enantiopure	NO	NO	P1	1	TRUE	FALSE	3.64	1	1	3	C	3	3	2	1	0	(1, RRS)	1	1	chiral	C1	1	1	1	W1_enantiopure AU	contains following chiral atom(s)C	NA	NA	7.1193	7.3896	8.9077	91.104	90.195	97.718	464.283	1.14628	C18 H28 O3 Si1	(3-{t-butyl(dimethyl)silyloxy}-3,4-dihydro-2H-pyran-4-yl)(phenyl)methanol	293 K	None	None	colorless	None	None	None	None	R.S.Perali, U.R.Boddu, D.C.Sankar
IRICOD	CHIRAL	Enantiopure	NO	NO	P1	1	TRUE	FALSE	2.8	1	1	5	C	5	3	1	4	0	(1, SSSSR)	1	1	chiral	C1	1	1	1	W1_enantiopure AU	contains following chiral atom(s)C	NA	NA	5.65102	7.3176	10.9437	84.486	84.613	80.474	442.834	1.32152	C22 H24 O4	(2aS,4aS,6S,7aS,7bR)-6-phenethyl-7a-phenyltetrahydro- 2H,6H-1,4,7-trioxacyclopentacdinden-2a(3H)-ol	173.2 K	None	None	colorless	None	None	None	None	Song-Song Jing, Ying Wang, Yong-Ming Yan, Xia Li, Xue-Jiao Li, Cheng-Cheng Zhao, Jia-Chen Sun, Pei-Yu Qiu, Shu-Li Man, Wen-Yuan Gao
IRISOS	CHIRAL	Enantiopure	NO	NO	P1	1	TRUE	FALSE	3.67	1	1	4	C	4	4	2	2	0	(1, SRSR)	1	1	chiral	C1	1	1	1	W1_enantiopure AU	contains following chiral atom(s)C	NA	NA	9.2724	9.995	10.7241	97.451	107.894	101.483	907.259	1.29188	C41 H47 N5 O6	Diethyl 2,6-bis((6-oxo-7,11-diazatricyclo7.3.1.02,7trideca-2,4-dien-11-yl)methyl)-4-phenyl-1,4-dihydropyridine-3,5-dicarboxylate	at 295 K	None	481-483 K	colorless	None	None	hexane-benzene	The space group is P1, not P-1 as published	I.V.Kulakov, D.M.Turdybekov
ISAGOB	CHIRAL	Enantiopure	NO	NO	P1	1	TRUE	FALSE	3.53	4	1	12	C	12	8	4	8	0	(4, SRS)	1	4	chiral	C1	4	4	4	Wa-could be Diast	contains following chiral atom(s)C	NA	NA	10.0882	11.6472	14.4851	101.004	106.6	96.185	1577.07	1.28196	C18 H24 O4	1-(10-hydroxy-5,8-dimethoxy-1,3,4,9,9a,10-hexahydroanthracen-4a(2H)-yl)ethan-1-one	100 K	None	None	colorless	None	None	None	None	Min Hou, Mengmeng Xu, Baochao Yang, Haibing He, Shuanhu Gao
ISECOZ	ACHIRAL	+ achiral molecule	NO	NO	P1	1	TRUE	FALSE	4.51	0	0	0	No Chiral atom	0	0	0	0	0						2	2	2	NA	contains following chiral atom(s)No Chiral atom	NA	NA	5.9099	10.3545	10.5587	96.711	103.046	98.509	614.906	1.32473	C13 H15 N3 O2	5,5-Dimethyl-2-(pyridin-3-ylhydrazono)cyclohexane-1,3-dione	at 293 K	None	None	colorless	None	None	None	None	A.Sethukumar, B.A.Prakasam, S.Kohli, R.Verma
ISELAT	CHIRAL	Enantiopure	NO	NO	P1	1	TRUE	FALSE	3.66	1	1	3	C	3	3	1	2	0	(1, SRS)	1	1	chiral	C1	1	1	1	W1_enantiopure AU	contains following chiral atom(s)C	NA	NA	7.5408	8.2689	9.2635	69.45	69.097	69.702	488.774	1.1498	C22 H26 O3	(1R,2S,5R)-Menthyl Î±-napthoylformate	at 296 K	None	89 deg.C	colorless	None	None	None	None	J.C.Barnes, R.Hampshire, T.J.R.Weakley
ISEROP	CHIRAL	Enantiopure	NO	NO	P1	1	TRUE	FALSE	2.53	1	1	5	C	5	5	3	2	0	(1, SRRSR)	1	1	chiral	C1	1	1	1	W1_enantiopure AU	contains following chiral atom(s)C	NA	NA	5.8625	11.4751	12.6755	68.6226	81.6769	87.139	785.683	1.32456	C36 H34 O8 S1	3-(benzoyloxy)-2-((benzoyloxy)methyl)-5-(benzyloxy)-6-(ethylsulfanyl)tetrahydro-2H-pyran-4-yl benzoate	100 K	None	None	colorless	None	None	None	None	R.Smith, H.Muller-Bunz, Xiangming Zhu
ISEWUA	CHIRAL	Enantiopure	NO	NO	P1	1	TRUE	FALSE	4.2	1	1	4	C	4	3	1	3	0	(1, SSSR)	1	1	chiral	C1	1	1	1	W1_enantiopure AU	contains following chiral atom(s)C	NA	NA	5.9773	8.3694	10.2159	96.555	96.79	99.663	495.571	1.47873	C20 H25 Br1 O6	2-(4-hydroxy-6-(2-methoxy-2-oxoethyl)-3-methyl-3-vinyltetrahydro-2H-pyran-2-yl)ethyl 4-bromobenzoate	293 K	None	None	colorless	None	None	None	None	Lin Yang, Zuming Lin, Sha-Hua Huang, Ran Hong
ISEYUD	CHIRAL	Enantiopure	NO	NO	P1	1	TRUE	FALSE	3.62	2	1	18	C	18	12	6	12	0	(2, RSSSSRSSR)	1	2	chiral	C1	2	2	2	Wa-could be Diast	contains following chiral atom(s)C	NA	NA	8.1068	10.2928	16.5231	85.021	79.174	67.749	1253.15	1.23125	C26 H40 O7	3-ethoxy-4a,10b,12a-trimethyl-9-oxohexadecahydro-1H-phenanthro2,1-cpyran-5,12-diyl diacetate	100.0 K	None	None	light colorless	None	None	None	None	Zhengyuan Xin, Hui Wang, Haibing He, Xiaoli Zhao, Shuanhu Gao
ISOHOQ	CHIRAL	Enantiopure	NO	NO	P1	1	TRUE	FALSE	3.04	4	1	4	C	4	4	0	4	0	(4, S)	1	4	chiral	C1	4	4	4	Wa-could be Diast	contains following chiral atom(s)C	NA	NA	7.82378	9.79404	17.3653	88.0648	79.0877	85.7449	1302.71	1.38321	C16 H14 F1 N1 O2	4-(4-fluorophenyl)-3-phenylmorpholin-2-one	140 K	None	None	colorless	None	None	None	None	Yu-Ping He, Hua Wu, Qian Wang, Jieping Zhu
ITAKIX	CHIRAL	Enantiopure	NO	NO	P1	1	TRUE	FALSE	3.69	1	1	3	C	3	1	1	2	0	(1, RSS)	1	1	chiral	C1	1	1	1	W1_enantiopure AU	contains following chiral atom(s)C	NA	NA	6.2686	8.196	6.084	111.81	101.01	110.62	252.3	1.10076	C10 H17 N1 O1	3-hydroxy-1,2,3-trimethylcyclohexanecarbonitrile	at 298 K	None	373-376 K	colorless	None	None	ethyl acetate/hexanes	None	F.F.Fleming, Zhiyu Zhang, Qunzhao Wang, O.W.Steward
ITOLOV	CHIRAL	Enantiopure	NO	NO	P1	1	TRUE	FALSE	3.48	1	1	1	C	1	1	0	1	0	(1, S)	1	1	chiral	C1	1	1	1	W2_enantiopure AU	contains following chiral atom(s)C	NA	NA	6.4512	8.5325	8.7429	91.537	93.551	91.604	479.943	1.17438	C20 H25 N3 O2	methyl 5-{5-(dimethylhydrazinylidene)methyl-1-methyl-1H-pyrrol-2-yl}-5-phenylpent-2-enoate	293 K	None	368 K	colorless	None	None	None	None	B.Lukasik, J.Kowalska, S.Frankowski, L.Albrecht
IVELOL	ACHIRAL	+ achiral molecule	NO	NO	P1	1	TRUE	FALSE	3.48	0	0	0	No Chiral atom	0	0	0	0	0						1	1	1	NA	contains following chiral atom(s)No Chiral atom	NA	NA	4.6051	6.0189	22.2172	88.393	88.521	78.044	602.087	1.31437	C33 H24 N4	4,4-Methylenebis(N-((E)-quinolin-2-ylmethylidene)aniline)	at 293 K	None	472 K	white	None	None	None	None	D.Djamel, D.Tahar, H.Djahida, H.Hanane, C.Salah
IVIKAC	CHIRAL	Enantiopure + achiral molecule	NO	NO	P1	1	TRUE	FALSE	4.12	3	1	30	C	30	24	18	12	0	(3, RRSRRRSSSR)	1	3	chiral	C1	7	3	3	Wa-could be Diast	contains following chiral atom(s)C	NA	NA	7.04914	18.4817	18.8671	117.453	99.2141	95.3368	2113.65	1.11804	C26 H45 N1 O3,1.33(C2 H3 N1)	N-ethyl-3,12-dihydroxycholan-24-amide acetonitrile solvate	120.0 K	None	None	colorless	None	None	None	None	R.Kuosmanen, R.Puttreddy, R.-M.Willman, I.Aijalainen, J.Ulrichova, A.Galandakova, H.Salo, K.Rissanen, E.Sievanen
IVOSUK	CHIRAL	Enantiopure	NO	NO	P1	1	TRUE	FALSE	4.6	2	1	2	C	2	2	2	0	0	(2, R)	1	2	chiral	C1	2	2	2	Wa-could be Diast	contains following chiral atom(s)C	NA	NA	5.1499	9.401	22.513	94.877	92.586	95.531	1079.38	1.25994	C25 H28 F1 N1 O3	benzyl {4-fluoro-7-(naphthalen-2-yl)oxyheptyl}carbamate	293.4 K	None	None	colorless	None	None	None	None	Xi Lu
IVUFIR	CHIRAL	Enantiopure + achiral molecule	NO	NO	P1	1	TRUE	FALSE	4.98	2	1	20	C	20	10	10	10	0	(2, SSRRRRRSSS)	1	2	chiral	C1	3	2	2	Wa-could be Diast	contains following chiral atom(s)C	NA	NA	7.0101	7.223	32.7603	87.963	87.131	62.359	1467.49	1.18072	C32 H48 O5,0.5(H2 O1)	21-hydroxy-11,29-dioxoolean-12-en-3-yl acetate hemihydrate	170 K	None	None	colorless	None	None	None	None	Tong Mu, Bingcheng Wei, Dapeng Zhu, Biao Yu
IWEBAN	CHIRAL	Enantiopure	NO	NO	P1	1	TRUE	FALSE	4.1	1	1	2	C	2	1	2	0	0	(1, RR)	1	1	chiral	C1	1	1	1	W1_enantiopure AU	contains following chiral atom(s)C	NA	NA	8.183	11.275	5.736	104.161	94.974	94.356	508.615	1.47681	C24 H22 Br1 N1 O3	5-methyl-2,3-diphenyl-5-isoxazolidinylmethyl p-bromobenzoate	None	None	None	colorless	None	None	None	None	M.Shirahase, S.Kanemasa, Y.Oderaotoshi
IWEBER	CHIRAL	Enantiopure	NO	NO	P1	1	TRUE	FALSE	4.8	1	1	2	C	2	1	2	0	0	(1, RR)	1	1	chiral	C1	1	1	1	W1_enantiopure AU	contains following chiral atom(s)C	NA	NA	8.249	10.929	6.055	103.648	95.74	92.71	526.385	1.63159	C23 H19 Br2 N1 O3	4-bromo-2,3-diphenyl-4-isoxazolidinylmethyl p-bromobenzoate	None	None	None	None	None	None	None	None	M.Shirahase, S.Kanemasa, Y.Oderaotoshi
IWUGUC	CHIRAL	Enantiopure + achiral molecule	NO	NO	P1	1	TRUE	FALSE	4.31	1	1	6	C	6	6	0	6	0	(1, SSSSSS)	1	1	chiral	C1	3	1	1	W1_enantiopure AU	contains following chiral atom(s)C	NA	NA	9.583	10.186	11.581	101.71	107.84	94.98	1040.15	1.20359	C40 H55 N5 O7,2(H2 O1)	Isaridin B dihydrate	at 293 K	None	None	colorless	None	None	None	None	G.Ravindra, R.S.Ranganayaki, S.Raghothama, M.C.Srinivasan, R.D.Gillardi, I.L.Karle, P.Balaram
IWUPUL	CHIRAL	Enantiopure	NO	NO	P1	1	TRUE	FALSE	4.58	1	1	3	C	3	3	1	2	0	(1, SSR)	1	1	chiral	C1	1	1	1	W1_enantiopure AU	contains following chiral atom(s)C	NA	NA	7.717	7.757	10.127	85.211	82.903	73.06	574.743	1.25544	C25 H30 N4 O3	Ethyl 2-(1-acetyl-3-methyl-2-phenylpyrazolidin-5-yl)amino-3-(3-indolyl)propionate	at 110 K	None	427 K	yellow	None	None	methanol/diethyl ether	None	L.A.Sviridova, G.K.Vertelov, V.V.Nesterov, M.Yu.Antipin
IXAHAQ	CHIRAL	Enantiopure	NO	NO	P1	1	TRUE	FALSE	4.09	1	1	11	C	11	8	2	9	0	(1, SSSRRSSSSSS)	1	1	chiral	C1	1	1	1	W1_enantiopure AU	contains following chiral atom(s)C	NA	NA	7.6789	10.2222	11.3519	102.368	103.812	101.113	816.808	1.18884	C35 H52 O7	(E)-(20S,25S)-20,23-Diacetyl-5Î²-furost-22-ene-3Î²,26-diyl diacetate	at 296.0 K	None	436 K	colorless	None	None	methanol	None	S.Meza-Reyes, S.Montiel-Smith, J.Sandoval-Ramirez, S.Bernes, G.Hernandez-Linares, R.L.Santillan, S.Rincon
IXALEB	MESO		NO	NO	P1	1	TRUE	FALSE	2.98	2	1	24	C	24	24	12	12	0	(1, RRSSSRSRSRSR), (1, RSRSSSRSRSRR)	2	2	diast, MESO	C1	2	2	2	DIAST-1, contains DIAST	contains following chiral atom(s)C	NA	NA	7.5355	9.9658	12.0205	101.245	105.412	109.717	777.878	1.35943	C21 H22 N2 O1	N-((pyridin-2-yl)methyl)heptacyclo6.6.0.02,6.03,13.04,11.05,9.010,14tetradecane-7-carboxamide	100 K	None	None	colorless	None	None	hexane/ethyl acetate	None	X.Marset, M.Recort-Fornals, M.Kpante, A.Zielinski, C.Golz, L.M.Wolf, M.Alcarazo
IXASOR	CHIRAL	Enantiopure	NO	NO	P1	1	TRUE	FALSE	3.2	1	1	2	C	2	2	1	1	0	(1, RS)	1	1	chiral	C1	1	1	1	W1_enantiopure AU	contains following chiral atom(s)C	NA	NA	8.6349	8.6718	8.9926	107.28	95.286	117.423	549.51	1.27677	C29 H26 O3	4-methoxy-2,2,5,5-tetraphenyltetrahydrofuran-3-ol	100 K	None	None	None	None	None	None	None	Xiaoyun Hu, Dongzhi Chen, Jirong Lan, Zixing Shan
IXENUU	CHIRAL	Enantiopure	NO	NO	P1	1	TRUE	FALSE	4.13	2	1	8	C	8	8	2	6	0	(2, SSSR)	1	2	chiral	C1	2	2	2	Wa-could be Diast	contains following chiral atom(s)C	NA	NA	10.099	13.385	8.0924	106.816	90.139	89.786	1047.11	1.23532	C22 H31 N1 O5	4-((2R,3S,5R,7S)-2,3-Epoxy-5,7-(isopropylidenedioxy)-1-oxo-9-phenylnonyl)morpholine	at 296.2 K	None	None	colorless	None	None	ethyl acetate/hexane	None	S.Tosaki, Y.Horiuchi, T.Nemoto, T.Ohshima, M.Shibasaki
IXENUX	CHIRAL	Enantiopure + achiral molecule	NO	NO	P1	1	TRUE	FALSE	3.53	3	1	6	C	6	0	6	0	0	(3, RR)	1	3	chiral	C2	4	3	3	Wa-could be Diast	contains following chiral atom(s)C	NA	NA	9.177	10.764	14.832	78.244	76.814	75.066	1361.85	1.40581	C18 H16 F6 O2,0.33(H2 O1)	2,2-(1,1-biphenyl-2,2-diyl)bis(1,1,1-trifluoropropan-2-ol) hydrate	297 K	None	None	colorless	None	None	None	None	Chi-Tung Yeung, Wesley Ting Kwok Chan, Wai-Sum Lo, G.-L.Law, Wing-Tak Wong
IXILAE	CHIRAL	Enantiopure	NO	NO	P1	1	TRUE	FALSE	2.46	2	1	4	C	4	2	0	4	0	(2, SS)	1	2	chiral	C1	2	2	2	Wa-could be Diast	contains following chiral atom(s)C	NA	NA	7.1339	7.3602	9.4972	82.435	72.199	81.393	467.489	1.35116	C11 H10 O3	3-ethenylidene-7a-methyl-3a,7a-dihydro-1-benzofuran-2,5(3H,4H)-dione	100 K	None	None	colorless	None	None	None	None	Weijun Yao, Xiaowei Dou, Shan Wen, Jien Wu, J.J.Vittal, Yixin Lu
IXITEP	CHIRAL	Enantiopure + achiral molecule	NO	NO	P1	1	TRUE	FALSE	3.88	1	1	4	C	4	4	0	4	0	(1, SSSS)	1	1	chiral	C1	4	1	1	W1_enantiopure AU	contains following chiral atom(s)C	NA	NA	9.6135	10.9162	11.1246	78.551	76.081	74.519	1080.74	1.14145	C35 H56 N6 O8,3(H2 O1)	Methyl N-(2,2-dimethylpropanoyl)alanylalanyl-2-methylalanylleucyl-2-methylalanylphenylalaninate trihydrate	at 293 K	None	None	colorless	None	None	None	None	Kantharaju, S.Raghothama, S.Aravinda, N.Shamala, P.Balaram
IXOJAG	CHIRAL	Enantiopure	NO	NO	P1	1	TRUE	FALSE	4.35	2	1	4	C	4	4	0	4	0	(2, SS)	1	2	chiral	C1	2	2	2	Wa-could be Diast	contains following chiral atom(s)C	NA	NA	7.463	7.4633	23.1431	91.299	94.067	90.194	1285.45	1.4659	C26 H23 Br1 N4 O6	Methyl 4-(4-bromophenyl)-5-phenyl-6-(2,4-dinitrophenylhydrazono)hex-2-en-1-oate	at 90 K	None	None	yellow	None	None	ethyl acetate/pentane	Referenced as a private communication in J. Org. Chem. 69, 9241, 2004	O.O.Gerlits, P.Coppens
IYAVEK	CHIRAL	Enantiopure	NO	NO	P1	1	TRUE	FALSE	3.56	4	1	8	C	8	4	4	4	0	(4, SR)	1	4	chiral	C1	4	4	4	Wa-could be Diast	contains following chiral atom(s)C	NA	NA	10.7736	10.7836	22.6044	85.6376	85.6486	69.028	2441.73	1.26382	C27 H29 F1 N2 O2 S1	3a-Fluoro-5-mesityl-8-methyl-1-((4-methylphenyl)sulfonyl)-1,2,3,3a,8,8a-hexahydropyrrolo2,3-bindole	at 150 K	None	None	colorless	None	None	None	None	O.Lozano, G.Blessley, T.M.del Campo, A.L.Thompson, G.T.Giuffredi, M.Bettati, M.Walker, R.Borman, V.Gouverneur
IYEGEA02	ACHIRAL	+ achiral molecule	NO	NO	P1	1	TRUE	FALSE	3.59	0	0	0	No Chiral atom	0	0	0	0	0						4	2	2	NA	contains following chiral atom(s)No Chiral atom	NA	NA	11.1045	11.9991	12.7949	96.06	108.545	111.168	1459.66	1.41898	C26 H18 N16 Si1,C2 H3 N1	bis(azido)-(1,10-phenanthroline)-bis(5-phenyltetrazolato)-silicon acetonitrile solvate	100 K	None	None	colorless	None	None	None	None	P.Portius, M.Davis
IYIGIJ	CHIRAL	Enantiopure	NO	NO	P1	1	TRUE	FALSE	3.83	1	1	10	C	10	4	8	2	0	(1, RRSRRRRSRR)	1	1	chiral	C1	1	1	1	W1_enantiopure AU	contains following chiral atom(s)C	NA	NA	7.4365	9.3813	10.4627	71.655	70.149	89.84	647.212	1.40759	C32 H36 O8	dimethyl 16,17-dihydroxy-1,5,8,12-tetramethyl-15,18-dioxo-1a,2,4,5,8a,9,11,12-octahydro-1H,8H-1,13:6,8-diethanobiscyclopropa1,5cyclopenta1,2-a:1,2-g12annulene-5,12-dicarboxylate	100 K	None	201-202 deg. C	red	None	None	n-hexane / acetone	None	Dan-Yang Zhang, Xiao-Xia Wang, Ya-Nan Wang, Min Wang, Peng-Yu Zhuang, Yang Jin, Hang Liu
IYISAL	CHIRAL	Enantiopure	NO	NO	P1	1	TRUE	FALSE	3.55	2	1	6	C	6	6	2	4	0	(2, SRS)	1	2	chiral	C1	2	2	2	Wa-could be Diast	contains following chiral atom(s)C	NA	NA	8.6175	9.5229	14.0157	97.684	98.194	101.659	1099.17	1.47841	C23 H18 Cl2 N2 O6	(2S,3R,4S)-2,4-Dichloro-3,4-diphenylbutyl-3,5-dinitrobenzoate	at 100 K	None	None	colorless	None	None	None	None	C.Sparr, R.Gilmour
IYIXEU	CHIRAL	Enantiopure + achiral molecule	NO	NO	P1	1	TRUE	FALSE	4.41	2	1	16	C	16	12	10	6	0	(2, RRSRRSSR)	1	2	chiral	C1	5	2	2	Wa-could be Diast	contains following chiral atom(s)C	NA	NA	7.4783	11.5713	13.3812	107.895	90.072	93.959	1098.97	1.36447	C24 H28 N2 O5,1.5(H2 O1)	7-(14-Hydroxy-11-oxo-12-oxa-6-azatetracyclo5.5.2.01,9.02,6tetradec-9-en-10-yl)-2-oxa-9-azatetracyclo6.5.1.01,5.09,13tetradec-4-en-3-one sesquihydrate	at 150 K	None	None	colorless	None	None	None	Study temperature given as 150 K and 293 K in the CIF	Bing-Xin Zhao, Ying Wang, Dong-Mei Zhang, Ren-Wang Jiang, Guo-Cai Wang, Jun-Min Shi, Xiao-Jun Huang, Wei-Min Chen, Chun-Tao Che, Wen-CaiYe
IYUSIH	ACHIRAL	+ achiral molecule	NO	NO	P1	1	TRUE	FALSE	2.97	0	0	0	No Chiral atom	0	0	0	0	0						1	1	1	NA	contains following chiral atom(s)No Chiral atom	NA	NA	4.71248	6.96463	11.5455	105.617	95.7876	95.9993	359.638	1.43762	C16 H13 N3 O2 S1	N-(1,3-benzothiazol-2-yl)acetylbenzohydrazide	100 K	None	None	colorless	None	None	None	None	R.A.Azzam, G.H.Elgemeie, M.M.Seif, P.G.Jones
IZECOG	CHIRAL	Enantiopure	NO	NO	P1	1	TRUE	FALSE	2.4	1	1	4	C	4	3	1	3	0	(1, SSRS)	1	1	chiral	C1	1	1	1	W1_enantiopure AU	contains following chiral atom(s)C	NA	NA	7.7236	8.7282	9.9342	81.176	67.43	64.577	558.468	1.30685	C26 H30 F1 N1 O4	4-((4-Fluorobenzyl)oxy)-3,7-dimethoxy-17-methyl-7,8-didehydromorphinan-6-ol	133 K	None	None	colorless	None	None	None	None	Xing-Liang Zheng, Ning-Fei Jiang, Shu-Jun Chen, Xue-Hui Zhan, Qing-Feng Jiang
JAFHIH	CHIRAL	Enantiopure	NO	NO	P1	1	TRUE	FALSE	3.1	2	1	6	C	6	6	4	2	0	(2, RRS)	1	2	chiral	C1	2	2	2	Wa-could be Diast	contains following chiral atom(s)C	NA	NA	8.643	10.122	10.391	87.04	73.58	72.37	830.447	1.40496	C14 H17 N5 O6	2-Deoxy-3,5-di-O-acetyl guanosine	None	None	None	colorless	None	None	None	None	L.H.Koole, H.M.Buck, J.A.Kanters, A.Schouten
JAGXEU	CHIRAL	Enantiopure	NO	NO	P1	1	TRUE	FALSE	3.6	2	1	4	C	4	2	2	2	0	(2, RS)	1	2	chiral	C1	2	2	2	Wa-could be Diast	contains following chiral atom(s)C	NA	NA	9.0362	9.4679	14.2731	101.92	100.086	93.251	1170.84	1.19231	C29 H29 B1 O2	(3-Benzoyl-(+)-camphorato)-diphenylboron	None	None	440 K	yellow	None	None	None	None	W.R.Cullen, S.J.Rettig, J.Trotter, E.B.Wickenheiser
JAKKUB	CHIRAL	Enantiopure + achiral molecule	NO	NO	P1	1	TRUE	FALSE	3.73	1	1	5	C	5	5	4	1	0	(1, RRSRR)	1	1	chiral	C1	2	1	1	W1_enantiopure AU	contains following chiral atom(s)C	NA	NA	9.659	9.764	8.86	110.27	106.33	108.7	666.205	1.38747	C18 H25 O8 P1 S3,C3 H8 O1	1,6-Anhydro-2-O-tosyl-4-S-(5,5-dimethyl-2-thioxa-1,3,2-dioxaphosphorinan-2-yl)-Î²-D-glucopyranose 2-propanol clathrate	at 150 K	None	None	None	triclinic (z is 1) polymorph	undergoes a phase transition below 90K	None	None	M.J.Potrzebowski, M.Michalska, A.E.Koziol, S.Kazmierski, T.Lis, J.Pluskowski, W.Ciesielski
JAKKUB01	CHIRAL	Enantiopure + achiral molecule	NO	NO	P1	1	TRUE	FALSE	4.27	2	1	10	C	10	10	8	2	0	(2, RRSRR)	1	2	chiral	C1	4	2	2	Wa-could be Diast	contains following chiral atom(s)C	NA	NA	8.865	9.709	16.39	91.6	90.29	110.27	1322.65	1.39771	C18 H25 O8 P1 S3,C3 H8 O1	1,6-Anhydro-2-O-tosyl-4-S-(5,5-dimethyl-2-thioxa-1,3,2-dioxaphosphorinan-2-yl)-Î²-D-glucopyranose 2-propanol clathrate	at 85 K	None	None	None	triclinic (z is 2) polymorph	undergoes a phase transition below 90K	None	None	M.J.Potrzebowski, M.Michalska, A.E.Koziol, S.Kazmierski, T.Lis, J.Pluskowski, W.Ciesielski
JANDUX	CHIRAL	Enantiopure	NO	NO	P1	1	TRUE	FALSE	4.7	1	1	2	C P	1	1	1	1	0	(1, RS)	1	1	chiral	C1	1	1	1	W1_enantiopure AU	contains following chiral atom(s)P,C	NA	NA	5.8473	9.932	12.1997	75.92	84.46	73.01	656.976	1.22212	C30 H31 N1 O1 P2	(R)-Benzylphenyl-2(2-(S)-diphenylphosphinomethylpyrrolidin-1-yl)phosphine	None	None	418 K	None	None	None	None	None	B.Faure, A.Archavlis, G.Buono
JAPHEQ	CHIRAL	Enantiopure + achiral molecule	NO	NO	P1	1	TRUE	FALSE	4.49	1	1	2	C	2	2	0	2	0	(1, SS)	1	1	chiral	C1	2	1	1	W1_enantiopure AU	contains following chiral atom(s)C	NA	NA	7.6897	10.3258	11.4856	110.728	95.868	106.012	799.342	1.62983	C32 H20 F2 N2 O8,C6 F6	2,2-(1,3,6,8-tetraoxo-1,3,6,8-tetrahydrobenzolmn3,8phenanthroline-2,7-diyl)bis(3-(4-fluorophenyl)propanoic acid) hexafluorobenzene solvate	150 K	None	None	yellow	None	None	Hexafluorobenzene	None	J.A.Tyson, V.Mirabello, D.G.Calatayud, Haobo Ge, G.Kociok-Kohn, S.W.Botchway, G.Dan Pantos, S.I.Pascu
JAPJOZ	CHIRAL	Enantiopure	NO	NO	P1	1	TRUE	FALSE	3.8	2	1	10	C	10	10	8	2	0	(2, RSRRR)	1	2	chiral	C1	2	2	2	Wa-could be Diast	contains following chiral atom(s)C	NA	NA	7.646	10.085	15.49	78.73	88.31	80.7	1156	1.27397	C20 H29 N1 O10	(4R,5R)-4(D-arabino-1,2,3,4-Tetra-acetoxybutyl)-1,2-dimethyl-5-nitro-1-cyclohexene	None	None	360.8K	colorless	None	None	None	None	J.Loub, J.Podlahova, J.Kopf, L.Walz
JAPPEV	CHIRAL	Enantiopure + achiral molecule	NO	NO	P1	1	TRUE	FALSE	4.9	1	1	4	C P	3	3	2	2	0	(1, RSRS)	1	1	chiral	C1	3	1	1	W1_enantiopure AU	contains following chiral atom(s)C,P	NA	NA	4.852	8.3703	10.0199	104.578	102.332	93.67	381.751	1.55398	C10 H16 N3 O7 P1,2(H2 O1)	5-Methyl-2-deoxycytidine 5-monophosphate dihydrate	None	None	None	None	None	None	None	y(C4) is 1.1359 not 1.3359	H.N.Lalitha, S.Ramakumar, M.A.Viswamitra
JAQCEM	CHIRAL	Enantiopure	NO	NO	P1	1	TRUE	FALSE	2.74	1	1	2	C	2	2	2	0	0	(1, RR)	1	1	chiral	C1	1	1	1	W1_enantiopure AU	contains following chiral atom(s)C	NA	NA	5.9855	7.5028	11.7339	92.291	99.73	101.309	507.822	1.25402	C22 H25 N1 O3 S1	N-(7-hydroxy-9-phenylnon-1-en-8-yn-4-yl)-4-methylbenzenesulfonamide	150 K	None	None	colorless	None	None	None	None	D.S.B.Daniels, A.S.Jones, A.L.Thompson, R.S.Paton, E.A.Anderson
[truncated: 1,621 more rows]
[truncated: 6 more columns]

## Sheet: Z=1
REFCODE	Best-Shift	Centroid	Optimal Origin	S(Ci) -original cell	S(Ci)-best shift	S(Ci)-optimal origin
[truncated: 1,044 more rows]

[truncated: 4 more sheets: Z=2, Z=4, Z=other, Approx-CSM]
